# Supplementary material for: New water fractions and transit time distributions at Plynlimon, Wales, estimated from stable water isotopes in precipitation and streamflow
Source: Copernicus journal article supplement (doi:10.5194/hess-2019-290), 2019-06-12
Supplement: Supplementary file 1 [file hess-2019-290-supplement.zip]

Archive with 4 entries (4 files):
- DataSetDocumentation.pdf
- NewWaterFractionsPlynlimon_Supplement.pdf
- Plynlimon_isotopes_and_chloride_7hourly_2007_2009.txt
- Plynlimon_isotopes_and_chloride_weekly_2004_2009.txt
