# Supplementary material for: New water fractions and transit time distributions at Plynlimon, Wales, estimated from stable water isotopes in precipitation and streamflow
Source: Copernicus journal article supplement (doi:10.5194/hess-2019-290), 2019-06-12
Supplement: Supplementary file 1 [file hess-2019-290-supplement.zip › Plynlimon_isotopes_and_chloride_7hourly_2007_2009.txt]

sample_ID	Unique Code	Site	Date_Time yyyy.mm.dd HH:MM	Volume-weighted mean sampling time yyyy.mm.dd HH:MM	Precip sampling starts yyyy.mm.dd HH:MM	Precip sampling ends yyyy.mm.dd HH:MM	Yr	Month	Day	Time HH:MM	Date yyyy.mm.dd	Year	Year_mean_sampling	water flux (mm/hr)	log_flow	Cl mg/l	delta_18O	delta_2H	Stream flow (Cumecs)	Runoff (mm/15min)	Rainfall (mm)	Notes	Type	Description	Sample yes/no	Isotope sample yes/no	Isotope bottle acidified	Dry deposition affected (yes/no)	Dry_interval	Day_of_week	Trip	Bottle_in_trip	delta_18O RDA	delta_2H RDA	Cl mg/l RDA
432	CR432	CR	2007.07.10 19:00	2007.07.10 15:30	2007.07.10 12:00	2007.07.10 19:00	2007	7	10	19:00	2007.07.10	2007.522717	2007.522317	0		9.29713357					0	None	input	near met. site at Carreg Wen	no	no		no	7	Tuesday	19	1			9.29713357
433	CR433	CR	2007.07.11 02:00	2007.07.10 22:30	2007.07.10 19:00	2007.07.11 02:00	2007	7	11	02:00	2007.07.11	2007.523516	2007.523116	0							0	None	input	near met. site at Carreg Wen	no	no		no	14	Tuesday	19	2
434	CR434	CR	2007.07.11 09:00	2007.07.11 05:30	2007.07.11 02:00	2007.07.11 09:00	2007	7	11	09:00	2007.07.11	2007.524315	2007.523916	0							0	None	input	near met. site at Carreg Wen	no	no		no	21	Wednesday	19	3
435	CR435	CR	2007.07.11 16:00	2007.07.11 12:30	2007.07.11 09:00	2007.07.11 16:00	2007	7	11	16:00	2007.07.11	2007.525114	2007.524715	0							0	None	input	near met. site at Carreg Wen	no	no		no	28	Wednesday	19	4
436	CR436	CR	2007.07.11 23:00	2007.07.11 19:30	2007.07.11 16:00	2007.07.11 23:00	2007	7	11	23:00	2007.07.11	2007.525913	2007.525514	0							0	None	input	near met. site at Carreg Wen	no	no		no	35	Wednesday	19	5
437	CR437	CR	2007.07.12 06:00	2007.07.12 03:10	2007.07.11 23:00	2007.07.12 06:00	2007	7	12	06:00	2007.07.12	2007.526712	2007.526389	0.21428571	-0.6690068						1.5	None	input	near met. site at Carreg Wen	no	no		no	42	Wednesday	19	6
438	CR438	CR	2007.07.12 13:00	2007.07.12 10:00	2007.07.12 06:00	2007.07.12 13:00	2007	7	12	13:00	2007.07.12	2007.527511	2007.527169	0.28571429	-0.544068	6.32	-2.392	-16.627			2	None	input	near met. site at Carreg Wen	yes	yes	no	no	49	Thursday	19	7	-2.392	-16.627	6.32
439	CR439	CR	2007.07.12 20:00	2007.07.12 13:30	2007.07.12 13:00	2007.07.12 20:00	2007	7	12	20:00	2007.07.12	2007.528311	2007.527569	0.07142857	-1.146128	2.64	-2.488	-23.983			0.5	None	input	near met. site at Carreg Wen	yes	yes	no	no	7	Thursday	19	8	-2.488	-23.983	2.64
440	CR440	CR	2007.07.13 03:00	2007.07.12 23:30	2007.07.12 20:00	2007.07.13 03:00	2007	7	13	03:00	2007.07.13	2007.52911	2007.52871	0							0	None	input	near met. site at Carreg Wen	no	no		no	7	Thursday	19	9
441	CR441	CR	2007.07.13 10:00	2007.07.13 07:43	2007.07.13 03:00	2007.07.13 10:00	2007	7	13	10:00	2007.07.13	2007.529909	2007.529649	1.57142857	0.19629465	2.54	-7.293	-57.16			11	None	input	near met. site at Carreg Wen	yes	yes	no	no	14	Friday	19	10	-7.293	-57.16	2.54
442	CR442	CR	2007.07.13 17:00	2007.07.13 12:32	2007.07.13 10:00	2007.07.13 17:00	2007	7	13	17:00	2007.07.13	2007.530708	2007.5302	3	0.47712125	0.64	-9.535	-72.158			21	None	input	near met. site at Carreg Wen	yes	yes	no	no	7	Friday	19	11	-9.535	-72.158	0.64
443	CR443	CR	2007.07.14 00:00	2007.07.13 19:06	2007.07.13 17:00	2007.07.14 00:00	2007	7	14	00:00	2007.07.14	2007.531507	2007.530949	0.92857143	-0.0321847	1.73	-8.539	-64.209			6.5	None	input	near met. site at Carreg Wen	yes	yes	no	no	7	Friday	19	12	-8.539	-64.209	1.73
444	CR444	CR	2007.07.14 07:00	2007.07.14 00:50	2007.07.14 00:00	2007.07.14 07:00	2007	7	14	07:00	2007.07.14	2007.532306	2007.531602	0.21428571	-0.6690068	2.76	-5.952	-44.058			1.5	None	input	near met. site at Carreg Wen	yes	yes	no	no	7	Saturday	19	13	-5.952	-44.058	2.76
445	CR445	CR	2007.07.14 14:00	2007.07.14 10:30	2007.07.14 07:00	2007.07.14 14:00	2007	7	14	14:00	2007.07.14	2007.533105	2007.532706	0							0	None	input	near met. site at Carreg Wen	no	no		no	7	Saturday	19	14
446	CR446	CR	2007.07.14 21:00	2007.07.14 17:30	2007.07.14 14:00	2007.07.14 21:00	2007	7	14	21:00	2007.07.14	2007.533904	2007.533505	0							0	None	input	near met. site at Carreg Wen	no	no		no	14	Saturday	19	15
447	CR447	CR	2007.07.15 04:00	2007.07.15 00:30	2007.07.14 21:00	2007.07.15 04:00	2007	7	15	04:00	2007.07.15	2007.534703	2007.534304	0							0	None	input	near met. site at Carreg Wen	no	no		no	21	Saturday	19	16
448	CR448	CR	2007.07.15 11:00	2007.07.15 09:10	2007.07.15 04:00	2007.07.15 11:00	2007	7	15	11:00	2007.07.15	2007.535502	2007.535293	0.21428571	-0.6690068						1.5	None	input	near met. site at Carreg Wen	no	no		no	28	Sunday	19	17
449	CR449	CR	2007.07.15 18:00	2007.07.15 16:50	2007.07.15 11:00	2007.07.15 18:00	2007	7	15	18:00	2007.07.15	2007.536301	2007.536168	0.21428571	-0.6690068	2.11	-7.326	-51.471			1.5	None	input	near met. site at Carreg Wen	yes	yes	no	no	35	Sunday	19	18	-7.326	-51.471	2.11
450	CR450	CR	2007.07.16 01:00	2007.07.15 20:12	2007.07.15 18:00	2007.07.16 01:00	2007	7	16	01:00	2007.07.16	2007.537101	2007.536554	0.5	-0.30103	0.88	-5.643	-36.371			3.5	None	input	near met. site at Carreg Wen	yes	yes	no	no	7	Sunday	19	19	-5.643	-36.371	0.88
451	CR451	CR	2007.07.16 08:00	2007.07.16 04:30	2007.07.16 01:00	2007.07.16 08:00	2007	7	16	08:00	2007.07.16	2007.5379	2007.5375	0		0.9					0	None	input	near met. site at Carreg Wen	yes	no		no	7	Monday	19	20			0.9
452	CR452	CR	2007.07.16 15:00	2007.07.16 11:30	2007.07.16 08:00	2007.07.16 15:00	2007	7	16	15:00	2007.07.16	2007.538699	2007.538299	0							0	None	input	near met. site at Carreg Wen	no	no		no	7	Monday	19	21
453	CR453	CR	2007.07.16 22:00	2007.07.16 18:30	2007.07.16 15:00	2007.07.16 22:00	2007	7	16	22:00	2007.07.16	2007.539498	2007.539098	0							0	None	input	near met. site at Carreg Wen	no	no		no	14	Monday	19	22
454	CR454	CR	2007.07.17 05:00	2007.07.17 01:30	2007.07.16 22:00	2007.07.17 05:00	2007	7	17	05:00	2007.07.17	2007.540297	2007.539897	0							0	None	input	near met. site at Carreg Wen	no	no		no	21	Monday	19	23
455	CR455	CR	2007.07.17 12:00	2007.07.17 11:30	2007.07.17 05:00	2007.07.17 12:00	2007	7	17	12:00	2007.07.17	2007.541096	2007.541039	0.14285714	-0.845098						1	None	input	near met. site at Carreg Wen	no	no		no	28	Tuesday	19	24
456	CR456	CR	2007.07.17 19:00	2007.07.17 16:24	2007.07.17 12:00	2007.07.17 19:00	2007	7	17	19:00	2007.07.17	2007.541895	2007.541599	1.5	0.17609126	1.4	-7.07	-47.963			10.5	None	input	near met. site at Carreg Wen	yes	yes	no	no	35	Tuesday	20	1	-7.07	-47.963	1.4
457	CR457	CR	2007.07.18 02:00	2007.07.17 19:30	2007.07.17 19:00	2007.07.18 02:00	2007	7	18	02:00	2007.07.18	2007.542694	2007.541952	0.35714286	-0.447158	1.79	-6.359	-41.657			2.5	None	input	near met. site at Carreg Wen	yes	yes	no	no	7	Tuesday	20	2	-6.359	-41.657	1.79
458	CR458	CR	2007.07.18 09:00	2007.07.18 05:30	2007.07.18 02:00	2007.07.18 09:00	2007	7	18	09:00	2007.07.18	2007.543493	2007.543094	0							0	None	input	near met. site at Carreg Wen	no	no		no	7	Wednesday	20	3
459	CR459	CR	2007.07.18 16:00	2007.07.18 10:30	2007.07.18 09:00	2007.07.18 16:00	2007	7	18	16:00	2007.07.18	2007.544292	2007.543664	0.07142857	-1.146128						0.5	None	input	near met. site at Carreg Wen	no	no		no	14	Wednesday	20	4
460	CR460	CR	2007.07.18 23:00	2007.07.18 19:30	2007.07.18 16:00	2007.07.18 23:00	2007	7	18	23:00	2007.07.18	2007.545091	2007.544692	0							0	None	input	near met. site at Carreg Wen	no	no		no	21	Wednesday	20	5
461	CR461	CR	2007.07.19 06:00	2007.07.19 02:30	2007.07.18 23:00	2007.07.19 06:00	2007	7	19	06:00	2007.07.19	2007.54589	2007.545491	0							0	None	input	near met. site at Carreg Wen	no	no		no	28	Wednesday	20	6
462	CR462	CR	2007.07.19 13:00	2007.07.19 09:30	2007.07.19 06:00	2007.07.19 13:00	2007	7	19	13:00	2007.07.19	2007.54669	2007.54629	0							0	None	input	near met. site at Carreg Wen	no	no		no	35	Thursday	20	7
463	CR463	CR	2007.07.19 20:00	2007.07.19 17:47	2007.07.19 13:00	2007.07.19 20:00	2007	7	19	20:00	2007.07.19	2007.547489	2007.547236	0.5	-0.30103	5.22	-4.758	-36.785			3.5	None	input	near met. site at Carreg Wen	yes	yes	no	no	42	Thursday	20	8	-4.758	-36.785	5.22
464	CR464	CR	2007.07.20 03:00	2007.07.20 00:15	2007.07.19 20:00	2007.07.20 03:00	2007	7	20	03:00	2007.07.20	2007.548288	2007.547974	0.57142857	-0.243038	4.08					4	None	input	near met. site at Carreg Wen	yes	no		no	7	Thursday	20	9			4.08
465	CR465	CR	2007.07.20 10:00	2007.07.20 06:43	2007.07.20 03:00	2007.07.20 10:00	2007	7	20	10:00	2007.07.20	2007.549087	2007.548712	3.28571429	0.5166298	0.29	-11.982	-87.849			23	None	input	near met. site at Carreg Wen	yes	yes	no	no	7	Friday	20	10	-11.982	-87.849	0.29
466	CR466	CR	2007.07.20 17:00	2007.07.20 13:27	2007.07.20 10:00	2007.07.20 17:00	2007	7	20	17:00	2007.07.20	2007.549886	2007.549481	2.92857143	0.46665582	0.31	-16.501	-124.829			20.5	None	input	near met. site at Carreg Wen	yes	yes	no	no	7	Friday	20	11	-16.501	-124.829	0.31
467	CR467	CR	2007.07.21 00:00	2007.07.20 19:27	2007.07.20 17:00	2007.07.21 00:00	2007	7	21	00:00	2007.07.21	2007.550685	2007.550166	1.64285714	0.2155998	0.52	-10.963	-79.268			11.5	None	input	near met. site at Carreg Wen	yes	yes	no	no	7	Friday	20	12	-10.963	-79.268	0.52
468	CR468	CR	2007.07.21 07:00	2007.07.21 04:15	2007.07.21 00:00	2007.07.21 07:00	2007	7	21	07:00	2007.07.21	2007.551484	2007.55117	0.28571429	-0.544068	1.61	-8.535	-57.927			2	None	input	near met. site at Carreg Wen	yes	yes	no	no	7	Saturday	20	13	-8.535	-57.927	1.61
469	CR469	CR	2007.07.21 14:00	2007.07.21 12:45	2007.07.21 07:00	2007.07.21 14:00	2007	7	21	14:00	2007.07.21	2007.552283	2007.55214	0.57142857	-0.243038	3.14	-8.816	-62.119			4	None	input	near met. site at Carreg Wen	yes	yes	no	no	7	Saturday	20	14	-8.816	-62.119	3.14
470	CR470	CR	2007.07.21 21:00	2007.07.21 14:30	2007.07.21 14:00	2007.07.21 21:00	2007	7	21	21:00	2007.07.21	2007.553082	2007.55234	0.14285714	-0.845098	0.59	-15.748	-118.379			1	None	input	near met. site at Carreg Wen	yes	yes	no	no	7	Saturday	20	15	-15.748	-118.379	0.59
471	CR471	CR	2007.07.22 04:00	2007.07.21 21:30	2007.07.21 21:00	2007.07.22 04:00	2007	7	22	04:00	2007.07.22	2007.553881	2007.553139	0.07142857	-1.146128						0.5	None	input	near met. site at Carreg Wen	no	no		no	7	Saturday	20	16
472	CR472	CR	2007.07.22 11:00	2007.07.22 10:30	2007.07.22 04:00	2007.07.22 11:00	2007	7	22	11:00	2007.07.22	2007.55468	2007.554623	0.21428571	-0.6690068						1.5	None	input	near met. site at Carreg Wen	no	no		no	14	Sunday	20	17
473	CR473	CR	2007.07.22 18:00	2007.07.22 12:58	2007.07.22 11:00	2007.07.22 18:00	2007	7	22	18:00	2007.07.22	2007.55548	2007.554905	1.07142857	0.02996322	0.41	-9.48	-70.531			7.5	None	input	near met. site at Carreg Wen	yes	yes	no	no	21	Sunday	20	18	-9.48	-70.531	0.41
474	CR474	CR	2007.07.23 01:00	2007.07.22 19:20	2007.07.22 18:00	2007.07.23 01:00	2007	7	23	01:00	2007.07.23	2007.556279	2007.555632	0.42857143	-0.3679768	0.21	-9.151	-62.511			3	None	input	near met. site at Carreg Wen	yes	yes	no	no	7	Sunday	20	19	-9.151	-62.511	0.21
475	CR475	CR	2007.07.23 08:00	2007.07.23 07:00	2007.07.23 01:00	2007.07.23 08:00	2007	7	23	08:00	2007.07.23	2007.557078	2007.556964	0.14285714	-0.845098						1	None	input	near met. site at Carreg Wen	no	no		no	7	Monday	20	20
476	CR476	CR	2007.07.23 15:00	2007.07.23 10:15	2007.07.23 08:00	2007.07.23 15:00	2007	7	23	15:00	2007.07.23	2007.557877	2007.557335	0.28571429	-0.544068	1.78	-7.371	-54.969			2	None	input	near met. site at Carreg Wen	yes	yes	no	no	14	Monday	20	21	-7.371	-54.969	1.78
477	CR477	CR	2007.07.23 22:00	2007.07.23 18:30	2007.07.23 15:00	2007.07.23 22:00	2007	7	23	22:00	2007.07.23	2007.558676	2007.558276	0							0	None	input	near met. site at Carreg Wen	no	no		no	7	Monday	20	22
478	CR478	CR	2007.07.24 05:00	2007.07.24 01:30	2007.07.23 22:00	2007.07.24 05:00	2007	7	24	05:00	2007.07.24	2007.559475	2007.559075	0							0	None	input	near met. site at Carreg Wen	no	no		no	14	Monday	20	23
479	CR479	CR	2007.07.24 12:00	2007.07.24 08:30	2007.07.24 05:00	2007.07.24 12:00	2007	7	24	12:00	2007.07.24	2007.560274	2007.559874	0							0	None	input	near met. site at Carreg Wen	no	no		no	21	Tuesday	20	24
480	CR480	CR	2007.07.24 19:00	2007.07.24 15:30	2007.07.24 12:00	2007.07.24 19:00	2007	7	24	19:00	2007.07.24	2007.561073	2007.560674	0							0	None	input	near met. site at Carreg Wen	no	no		no	28	Tuesday	21	1
481	CR481	CR	2007.07.25 02:00	2007.07.25 01:30	2007.07.24 19:00	2007.07.25 02:00	2007	7	25	02:00	2007.07.25	2007.561872	2007.561815	0.07142857	-1.146128						0.5	None	input	near met. site at Carreg Wen	no	no		no	35	Tuesday	21	2
482	CR482	CR	2007.07.25 09:00	2007.07.25 05:56	2007.07.25 02:00	2007.07.25 09:00	2007	7	25	09:00	2007.07.25	2007.562671	2007.562322	3.07142857	0.48734042	1.47	-3.591	-19.532			21.5	None	input	near met. site at Carreg Wen	yes	yes	no	no	42	Wednesday	21	3	-3.591	-19.532	1.47
483	CR483	CR	2007.07.25 16:00	2007.07.25 11:30	2007.07.25 09:00	2007.07.25 16:00	2007	7	25	16:00	2007.07.25	2007.56347	2007.562957	0.07142857	-1.146128	0.7	-2.973	-17.27			0.5	None	input	near met. site at Carreg Wen	yes	yes	no	no	7	Wednesday	21	4	-2.973	-17.27	0.7
484	CR484	CR	2007.07.25 23:00	2007.07.25 19:30	2007.07.25 16:00	2007.07.25 23:00	2007	7	25	23:00	2007.07.25	2007.564269	2007.56387	0							0	None	input	near met. site at Carreg Wen	no	no		no	7	Wednesday	21	5
485	CR485	CR	2007.07.26 06:00	2007.07.26 02:50	2007.07.25 23:00	2007.07.26 06:00	2007	7	26	06:00	2007.07.26	2007.565069	2007.564709	1.85714286	0.26884531	10.4	-4.262	-21.883			13	None	input	near met. site at Carreg Wen	yes	yes	no	no	14	Wednesday	21	6	-4.262	-21.883	10.4
486	CR486	CR	2007.07.26 13:00	2007.07.26 09:51	2007.07.26 06:00	2007.07.26 13:00	2007	7	26	13:00	2007.07.26	2007.565868	2007.565509	3	0.47712125	2.42	-6.968	-45.864			21	None	input	near met. site at Carreg Wen	yes	yes	no	no	7	Thursday	21	7	-6.968	-45.864	2.42
487	CR487	CR	2007.07.26 20:00	2007.07.26 17:50	2007.07.26 13:00	2007.07.26 20:00	2007	7	26	20:00	2007.07.26	2007.566667	2007.566419	0.85714286	-0.0669468		-6.923	-43.985			6	None	input	near met. site at Carreg Wen	yes	yes	no	no	7	Thursday	21	8	-6.923	-43.985
488	CR488	CR	2007.07.27 03:00	2007.07.26 23:30	2007.07.26 20:00	2007.07.27 03:00	2007	7	27	03:00	2007.07.27	2007.567466	2007.567066	0							0	None	input	near met. site at Carreg Wen	no	no		no	7	Thursday	21	9
489	CR489	CR	2007.07.27 10:00	2007.07.27 08:50	2007.07.27 03:00	2007.07.27 10:00	2007	7	27	10:00	2007.07.27	2007.568265	2007.568132	0.21428571	-0.6690068	5.04					1.5	None	input	near met. site at Carreg Wen	yes	no		no	14	Friday	21	10			5.04
490	CR490	CR	2007.07.27 17:00	2007.07.27 13:30	2007.07.27 10:00	2007.07.27 17:00	2007	7	27	17:00	2007.07.27	2007.569064	2007.568664	0							0	None	input	near met. site at Carreg Wen	yes	no		no	7	Friday	21	11
491	CR491	CR	2007.07.28 00:00	2007.07.27 21:50	2007.07.27 17:00	2007.07.28 00:00	2007	7	28	00:00	2007.07.28	2007.569863	2007.569616	0.21428571	-0.6690068	9.12	-4.04	-22.724			1.5	None	input	near met. site at Carreg Wen	yes	yes	no	no	7	Friday	21	12	-4.04	-22.724	9.12
492	CR492	CR	2007.07.28 07:00	2007.07.28 03:30	2007.07.28 00:00	2007.07.28 07:00	2007	7	28	07:00	2007.07.28	2007.570662	2007.570263	0							0	None	input	near met. site at Carreg Wen	no	no		no	7	Saturday	21	13
493	CR493	CR	2007.07.28 14:00	2007.07.28 10:30	2007.07.28 07:00	2007.07.28 14:00	2007	7	28	14:00	2007.07.28	2007.571461	2007.571062	0							0	None	input	near met. site at Carreg Wen	no	no		no	14	Saturday	21	14
494	CR494	CR	2007.07.28 21:00	2007.07.28 18:48	2007.07.28 14:00	2007.07.28 21:00	2007	7	28	21:00	2007.07.28	2007.57226	2007.572009	0.71428571	-0.146128	2.96	-9.066	-69.394			5	None	input	near met. site at Carreg Wen	yes	yes	no	no	21	Saturday	21	15	-9.066	-69.394	2.96
495	CR495	CR	2007.07.29 04:00	2007.07.28 22:00	2007.07.28 21:00	2007.07.29 04:00	2007	7	29	04:00	2007.07.29	2007.573059	2007.572374	0.14285714	-0.845098	1.86	-12.61	-94.959			1	None	input	near met. site at Carreg Wen	yes	yes	no	no	7	Saturday	21	16	-12.61	-94.959	1.86
496	CR496	CR	2007.07.29 11:00	2007.07.29 07:30	2007.07.29 04:00	2007.07.29 11:00	2007	7	29	11:00	2007.07.29	2007.573858	2007.573459	0							0	None	input	near met. site at Carreg Wen	no	no		no	7	Sunday	21	17
497	CR497	CR	2007.07.29 18:00	2007.07.29 14:30	2007.07.29 11:00	2007.07.29 18:00	2007	7	29	18:00	2007.07.29	2007.574658	2007.574258	0							0	None	input	near met. site at Carreg Wen	no	no		no	14	Sunday	21	18
498	CR498	CR	2007.07.30 01:00	2007.07.29 21:30	2007.07.29 18:00	2007.07.30 01:00	2007	7	30	01:00	2007.07.30	2007.575457	2007.575057	0							0	None	input	near met. site at Carreg Wen	no	no		no	21	Sunday	21	19
499	CR499	CR	2007.07.30 08:00	2007.07.30 04:30	2007.07.30 01:00	2007.07.30 08:00	2007	7	30	08:00	2007.07.30	2007.576256	2007.575856	0							0	None	input	near met. site at Carreg Wen	no	no		no	28	Monday	21	20
500	CR500	CR	2007.07.30 15:00	2007.07.30 10:30	2007.07.30 08:00	2007.07.30 15:00	2007	7	30	15:00	2007.07.30	2007.577055	2007.576541	0.07142857	-1.146128						0.5	None	input	near met. site at Carreg Wen	no	no		no	35	Monday	21	21
501	CR501	CR	2007.07.30 22:00	2007.07.30 18:30	2007.07.30 15:00	2007.07.30 22:00	2007	7	30	22:00	2007.07.30	2007.577854	2007.577454	0							0	None	input	near met. site at Carreg Wen	no	no		no	42	Monday	21	22
502	CR502	CR	2007.07.31 05:00	2007.07.31 01:30	2007.07.30 22:00	2007.07.31 05:00	2007	7	31	05:00	2007.07.31	2007.578653	2007.578253	0							0	None	input	near met. site at Carreg Wen	no	no		no	49	Monday	21	23
503	CR503	CR	2007.07.31 12:00	2007.07.31 08:30	2007.07.31 05:00	2007.07.31 12:00	2007	7	31	12:00	2007.07.31	2007.579452	2007.579053	0							0	None	input	near met. site at Carreg Wen	no	no		no	56	Tuesday	21	24
504	CR504	CR	2007.07.31 19:00	2007.07.31 15:30	2007.07.31 12:00	2007.07.31 19:00	2007	7	31	19:00	2007.07.31	2007.580251	2007.579852	0			-11.294	-83.379			0	None	input	near met. site at Carreg Wen	yes	yes	no	no	63	Tuesday	22	1	-11.294	-83.379
505	CR505	CR	2007.08.01 02:00	2007.07.31 22:30	2007.07.31 19:00	2007.08.01 02:00	2007	8	1	02:00	2007.08.01	2007.58105	2007.580651	0							0	None	input	near met. site at Carreg Wen	no	no		no	7	Tuesday	22	2
506	CR506	CR	2007.08.01 09:00	2007.08.01 05:30	2007.08.01 02:00	2007.08.01 09:00	2007	8	1	09:00	2007.08.01	2007.581849	2007.58145	0							0	None	input	near met. site at Carreg Wen	no	no		no	14	Wednesday	22	3
507	CR507	CR	2007.08.01 16:00	2007.08.01 12:30	2007.08.01 09:00	2007.08.01 16:00	2007	8	1	16:00	2007.08.01	2007.582648	2007.582249	0							0	None	input	near met. site at Carreg Wen	no	no		no	21	Wednesday	22	4
508	CR508	CR	2007.08.01 23:00	2007.08.01 19:30	2007.08.01 16:00	2007.08.01 23:00	2007	8	1	23:00	2007.08.01	2007.583448	2007.583048	0							0	None	input	near met. site at Carreg Wen	no	no		no	28	Wednesday	22	5
509	CR509	CR	2007.08.02 06:00	2007.08.02 02:30	2007.08.01 23:00	2007.08.02 06:00	2007	8	2	06:00	2007.08.02	2007.584247	2007.583847	0							0	None	input	near met. site at Carreg Wen	no	no		no	35	Wednesday	22	6
510	CR510	CR	2007.08.02 13:00	2007.08.02 09:30	2007.08.02 06:00	2007.08.02 13:00	2007	8	2	13:00	2007.08.02	2007.585046	2007.584646	0							0	None	input	near met. site at Carreg Wen	no	no		no	42	Thursday	22	7
511	CR511	CR	2007.08.02 20:00	2007.08.02 16:30	2007.08.02 13:00	2007.08.02 20:00	2007	8	2	20:00	2007.08.02	2007.585845	2007.585445	0							0	None	input	near met. site at Carreg Wen	no	no		no	49	Thursday	22	8
512	CR512	CR	2007.08.03 03:00	2007.08.02 23:30	2007.08.02 20:00	2007.08.03 03:00	2007	8	3	03:00	2007.08.03	2007.586644	2007.586244	0		1.57	-10.42	-75.032			0	None	input	near met. site at Carreg Wen	yes	yes	no	no	56	Thursday	22	9	-10.42	-75.032	1.57
513	CR513	CR	2007.08.03 10:00	2007.08.03 06:30	2007.08.03 03:00	2007.08.03 10:00	2007	8	3	10:00	2007.08.03	2007.587443	2007.587043	0							0	None	input	near met. site at Carreg Wen	no	no		no	7	Friday	22	10
514	CR514	CR	2007.08.03 17:00	2007.08.03 14:30	2007.08.03 10:00	2007.08.03 17:00	2007	8	3	17:00	2007.08.03	2007.588242	2007.587957	0.07142857	-1.146128		-1.578	-11.839			0.5	None	input	near met. site at Carreg Wen	yes	yes	no	no	14	Friday	22	11	-1.578	-11.839
515	CR515	CR	2007.08.04 00:00	2007.08.03 20:50	2007.08.03 17:00	2007.08.04 00:00	2007	8	4	00:00	2007.08.04	2007.589041	2007.58868	0.21428571	-0.6690068		-2.183	-12.33			1.5	None	input	near met. site at Carreg Wen	yes	yes	no	no	7	Friday	22	12	-2.183	-12.33
516	CR516	CR	2007.08.04 07:00	2007.08.04 03:10	2007.08.04 00:00	2007.08.04 07:00	2007	8	4	07:00	2007.08.04	2007.58984	2007.589403	0.42857143	-0.3679768	7.98	-3.058	-12.938			3	None	input	near met. site at Carreg Wen	yes	yes	no	no	7	Saturday	22	13	-3.058	-12.938	7.98
517	CR517	CR	2007.08.04 14:00	2007.08.04 09:15	2007.08.04 07:00	2007.08.04 14:00	2007	8	4	14:00	2007.08.04	2007.590639	2007.590097	0.57142857	-0.243038	3.5	-1.982	-8.712			4	None	input	near met. site at Carreg Wen	yes	yes	no	no	7	Saturday	22	14	-1.982	-8.712	3.5
518	CR518	CR	2007.08.04 21:00	2007.08.04 17:30	2007.08.04 14:00	2007.08.04 21:00	2007	8	4	21:00	2007.08.04	2007.591438	2007.591039	0							0	None	input	near met. site at Carreg Wen	no	no		no	7	Saturday	22	15
519	CR519	CR	2007.08.05 04:00	2007.08.05 00:30	2007.08.04 21:00	2007.08.05 04:00	2007	8	5	04:00	2007.08.05	2007.592237	2007.591838	0							0	None	input	near met. site at Carreg Wen	no	no		no	14	Saturday	22	16
520	CR520	CR	2007.08.05 11:00	2007.08.05 07:30	2007.08.05 04:00	2007.08.05 11:00	2007	8	5	11:00	2007.08.05	2007.593037	2007.592637	0							0	None	input	near met. site at Carreg Wen	no	no		no	21	Sunday	22	17
521	CR521	CR	2007.08.05 18:00	2007.08.05 17:30	2007.08.05 11:00	2007.08.05 18:00	2007	8	5	18:00	2007.08.05	2007.593836	2007.593779	0.07142857	-1.146128						0.5	None	input	near met. site at Carreg Wen	no	no		no	28	Sunday	22	18
522	CR522	CR	2007.08.06 01:00	2007.08.05 20:10	2007.08.05 18:00	2007.08.06 01:00	2007	8	6	01:00	2007.08.06	2007.594635	2007.594083	0.21428571	-0.6690068	9.82	-4.141	-27.273			1.5	None	input	near met. site at Carreg Wen	yes	yes	no	no	35	Sunday	22	19	-4.141	-27.273	9.82
523	CR523	CR	2007.08.06 08:00	2007.08.06 04:47	2007.08.06 01:00	2007.08.06 08:00	2007	8	6	08:00	2007.08.06	2007.595434	2007.595067	0.5	-0.30103	5.43	-10.457	-70.958			3.5	None	input	near met. site at Carreg Wen	yes	yes	no	no	7	Monday	22	20	-10.457	-70.958	5.43
524	CR524	CR	2007.08.06 15:00	2007.08.06 11:30	2007.08.06 08:00	2007.08.06 15:00	2007	8	6	15:00	2007.08.06	2007.596233	2007.595833	0			-6.946	-47.179			0	None	input	near met. site at Carreg Wen	yes	yes	no	no	7	Monday	22	21	-6.946	-47.179
525	CR525	CR	2007.08.06 22:00	2007.08.06 18:30	2007.08.06 15:00	2007.08.06 22:00	2007	8	6	22:00	2007.08.06	2007.597032	2007.596632	0							0	None	input	near met. site at Carreg Wen	no	no		no	7	Monday	22	22
526	CR526	CR	2007.08.07 05:00	2007.08.07 02:15	2007.08.06 22:00	2007.08.07 05:00	2007	8	7	05:00	2007.08.07	2007.597831	2007.597517	0.28571429	-0.544068	5.81	-9.229	-65.365			2	None	input	near met. site at Carreg Wen	yes	yes	no	no	14	Monday	22	23	-9.229	-65.365	5.81
527	CR527	CR	2007.08.07 12:00	2007.08.07 10:30	2007.08.07 05:00	2007.08.07 12:00	2007	8	7	12:00	2007.08.07	2007.59863	2007.598459	0.07142857	-1.146128						0.5	None	input	near met. site at Carreg Wen	no	no		no	7	Tuesday	22	24
528	CR528	CR	2007.08.07 19:00	2007.08.07 12:30	2007.08.07 12:00	2007.08.07 19:00	2007	8	7	19:00	2007.08.07	2007.599429	2007.598687	0.07142857	-1.146128						0.5	None	input	near met. site at Carreg Wen	no	no		no	14	Tuesday	23	1
529	CR529	CR	2007.08.08 02:00	2007.08.07 22:30	2007.08.07 19:00	2007.08.08 02:00	2007	8	8	02:00	2007.08.08	2007.600228	2007.599829	0							0	None	input	near met. site at Carreg Wen	no	no		no	21	Tuesday	23	2
530	CR530	CR	2007.08.08 09:00	2007.08.08 08:30	2007.08.08 02:00	2007.08.08 09:00	2007	8	8	09:00	2007.08.08	2007.601027	2007.60097	0.07142857	-1.146128						0.5	None	input	near met. site at Carreg Wen	no	no		no	28	Wednesday	23	3
531	CR531	CR	2007.08.08 16:00	2007.08.08 12:30	2007.08.08 09:00	2007.08.08 16:00	2007	8	8	16:00	2007.08.08	2007.601827	2007.601427	0							0	None	input	near met. site at Carreg Wen	no	no		no	35	Wednesday	23	4
532	CR532	CR	2007.08.08 23:00	2007.08.08 19:30	2007.08.08 16:00	2007.08.08 23:00	2007	8	8	23:00	2007.08.08	2007.602626	2007.602226	0							0	None	input	near met. site at Carreg Wen	no	no		no	42	Wednesday	23	5
533	CR533	CR	2007.08.09 06:00	2007.08.09 02:30	2007.08.08 23:00	2007.08.09 06:00	2007	8	9	06:00	2007.08.09	2007.603425	2007.603025	0							0	None	input	near met. site at Carreg Wen	no	no		no	49	Wednesday	23	6
534	CR534	CR	2007.08.09 13:00	2007.08.09 09:30	2007.08.09 06:00	2007.08.09 13:00	2007	8	9	13:00	2007.08.09	2007.604224	2007.603824	0							0	None	input	near met. site at Carreg Wen	no	no		no	56	Thursday	23	7
535	CR535	CR	2007.08.09 20:00	2007.08.09 16:30	2007.08.09 13:00	2007.08.09 20:00	2007	8	9	20:00	2007.08.09	2007.605023	2007.604623	0							0	None	input	near met. site at Carreg Wen	no	no		no	63	Thursday	23	8
536	CR536	CR	2007.08.10 03:00	2007.08.09 23:30	2007.08.09 20:00	2007.08.10 03:00	2007	8	10	03:00	2007.08.10	2007.605822	2007.605422	0							0	None	input	near met. site at Carreg Wen	no	no		no	70	Thursday	23	9
537	CR537	CR	2007.08.10 10:00	2007.08.10 06:30	2007.08.10 03:00	2007.08.10 10:00	2007	8	10	10:00	2007.08.10	2007.606621	2007.606222	0							0	None	input	near met. site at Carreg Wen	no	no		no	77	Friday	23	10
538	CR538	CR	2007.08.10 17:00	2007.08.10 13:30	2007.08.10 10:00	2007.08.10 17:00	2007	8	10	17:00	2007.08.10	2007.60742	2007.607021	0		6.81	-6.614	-42.745			0	None	input	near met. site at Carreg Wen	yes	yes	no	no	84	Friday	23	11	-6.614	-42.745	6.81
539	CR539	CR	2007.08.11 00:00	2007.08.10 17:30	2007.08.10 17:00	2007.08.11 00:00	2007	8	11	00:00	2007.08.11	2007.608219	2007.607477	0.07142857	-1.146128	4.51	-6.546	-43.446			0.5	None	input	near met. site at Carreg Wen	yes	yes	no	no	7	Friday	23	12	-6.546	-43.446	4.51
540	CR540	CR	2007.08.11 07:00	2007.08.11 03:30	2007.08.11 00:00	2007.08.11 07:00	2007	8	11	07:00	2007.08.11	2007.609018	2007.608619	0		2.54	-9.165	-64.528			0	None	input	near met. site at Carreg Wen	yes	yes	no	no	7	Saturday	23	13	-9.165	-64.528	2.54
541	CR541	CR	2007.08.11 14:00	2007.08.11 10:30	2007.08.11 07:00	2007.08.11 14:00	2007	8	11	14:00	2007.08.11	2007.609817	2007.609418	0		1.87	-7.093	-50.838			0	None	input	near met. site at Carreg Wen	yes	yes	no	no	7	Saturday	23	14	-7.093	-50.838	1.87
542	CR542	CR	2007.08.11 21:00	2007.08.11 17:30	2007.08.11 14:00	2007.08.11 21:00	2007	8	11	21:00	2007.08.11	2007.610616	2007.610217	0							0	None	input	near met. site at Carreg Wen	no	no		no	7	Saturday	23	15
543	CR543	CR	2007.08.12 04:00	2007.08.12 00:40	2007.08.11 21:00	2007.08.12 04:00	2007	8	12	04:00	2007.08.12	2007.611416	2007.611035	0.42857143	-0.3679768	9.1	-3.881	-22.402			3	None	input	near met. site at Carreg Wen	yes	yes	no	no	14	Saturday	23	16	-3.881	-22.402	9.1
544	CR544	CR	2007.08.12 11:00	2007.08.12 05:35	2007.08.12 04:00	2007.08.12 11:00	2007	8	12	11:00	2007.08.12	2007.612215	2007.611597	0.78571429	-0.1047354	4.46	-8.727	-61.526			5.5	None	input	near met. site at Carreg Wen	yes	yes	no	no	7	Sunday	23	17	-8.727	-61.526	4.46
545	CR545	CR	2007.08.12 18:00	2007.08.12 14:30	2007.08.12 11:00	2007.08.12 18:00	2007	8	12	18:00	2007.08.12	2007.613014	2007.612614	0							0	None	input	near met. site at Carreg Wen	no	no		no	7	Sunday	23	18
546	CR546	CR	2007.08.13 01:00	2007.08.12 22:42	2007.08.12 18:00	2007.08.13 01:00	2007	8	13	01:00	2007.08.13	2007.613813	2007.61355	0.35714286	-0.447158	10.3	-5.372	-34.749			2.5	None	input	near met. site at Carreg Wen	yes	yes	no	no	14	Sunday	23	19	-5.372	-34.749	10.3
547	CR547	CR	2007.08.13 08:00	2007.08.13 03:21	2007.08.13 01:00	2007.08.13 08:00	2007	8	13	08:00	2007.08.13	2007.614612	2007.614082	1	0	3.13	-6.453	-40.1			7	None	input	near met. site at Carreg Wen	yes	yes	no	no	7	Monday	23	20	-6.453	-40.1	3.13
548	CR548	CR	2007.08.13 15:00	2007.08.13 12:30	2007.08.13 08:00	2007.08.13 15:00	2007	8	13	15:00	2007.08.13	2007.615411	2007.615126	0.07142857	-1.146128						0.5	None	input	near met. site at Carreg Wen	no	no		no	7	Monday	23	21
549	CR549	CR	2007.08.13 22:00	2007.08.13 20:15	2007.08.13 15:00	2007.08.13 22:00	2007	8	13	22:00	2007.08.13	2007.61621	2007.61601	0.28571429	-0.544068	3.31	-5.652	-33.745			2	None	input	near met. site at Carreg Wen	yes	yes	no	no	14	Monday	23	22	-5.652	-33.745	3.31
550	CR550	CR	2007.08.14 05:00	2007.08.14 00:30	2007.08.13 22:00	2007.08.14 05:00	2007	8	14	05:00	2007.08.14	2007.617009	2007.616495	0.5	-0.30103	2.3	-5.419	-30.459			3.5	None	input	near met. site at Carreg Wen	yes	yes	no	no	7	Monday	23	23	-5.419	-30.459	2.3
551	CR551	CR	2007.08.14 12:00	2007.08.14 07:48	2007.08.14 05:00	2007.08.14 12:00	2007	8	14	12:00	2007.08.14	2007.617808	2007.617331	1.35714286	0.13262557	2.36	-9.91	-71.647			9.5	None	input	near met. site at Carreg Wen	yes	yes	no	no	7	Tuesday	23	24	-9.91	-71.647	2.36
552	CR552	CR	2007.08.14 19:00	2007.08.14 14:18	2007.08.14 12:00	2007.08.14 19:00	2007	8	14	19:00	2007.08.14	2007.618607	2007.618071	0.35714286	-0.447158	2.19	-7.474	-54.104			2.5	None	input	near met. site at Carreg Wen	yes	yes	no	no	7	Tuesday	24	1	-7.474	-54.104	2.19
553	CR553	CR	2007.08.15 02:00	2007.08.14 22:18	2007.08.14 19:00	2007.08.15 02:00	2007	8	15	02:00	2007.08.15	2007.619406	2007.618984	1.07142857	0.02996322	5.56	-4.028	-25.169			7.5	None	input	near met. site at Carreg Wen	yes	yes	no	no	7	Tuesday	24	2	-4.028	-25.169	5.56
554	CR554	CR	2007.08.15 09:00	2007.08.15 07:00	2007.08.15 02:00	2007.08.15 09:00	2007	8	15	09:00	2007.08.15	2007.620206	2007.619977	0.14285714	-0.845098	6.01	-4.615	-28.72			1	None	input	near met. site at Carreg Wen	yes	yes	no	no	7	Wednesday	24	3	-4.615	-28.72	6.01
555	CR555	CR	2007.08.15 16:00	2007.08.15 11:18	2007.08.15 09:00	2007.08.15 16:00	2007	8	15	16:00	2007.08.15	2007.621005	2007.620468	0.35714286	-0.447158	2.39	-9.36	-70.058			2.5	None	input	near met. site at Carreg Wen	yes	yes	no	no	7	Wednesday	24	4	-9.36	-70.058	2.39
556	CR556	CR	2007.08.15 23:00	2007.08.15 20:42	2007.08.15 16:00	2007.08.15 23:00	2007	8	15	23:00	2007.08.15	2007.621804	2007.621541	0.35714286	-0.447158	3.17	-7.468	-50.582			2.5	None	input	near met. site at Carreg Wen	yes	yes	no	no	7	Wednesday	24	5	-7.468	-50.582	3.17
557	CR557	CR	2007.08.16 06:00	2007.08.16 02:30	2007.08.15 23:00	2007.08.16 06:00	2007	8	16	06:00	2007.08.16	2007.622603	2007.622203	0							0	None	input	near met. site at Carreg Wen	no	no		no	7	Wednesday	24	6
558	CR558	CR	2007.08.16 13:00	2007.08.16 08:30	2007.08.16 06:00	2007.08.16 13:00	2007	8	16	13:00	2007.08.16	2007.623402	2007.622888	0.35714286	-0.447158	9.01	-7.113	-43.788			2.5	None	input	near met. site at Carreg Wen	yes	yes	no	no	14	Thursday	24	7	-7.113	-43.788	9.01
559	CR559	CR	2007.08.16 20:00	2007.08.16 16:30	2007.08.16 13:00	2007.08.16 20:00	2007	8	16	20:00	2007.08.16	2007.624201	2007.623801	0							0	None	input	near met. site at Carreg Wen	no	no		no	7	Thursday	24	8
560	CR560	CR	2007.08.17 03:00	2007.08.16 23:30	2007.08.16 20:00	2007.08.17 03:00	2007	8	17	03:00	2007.08.17	2007.625	2007.624601	0.07142857	-1.146128						0.5	None	input	near met. site at Carreg Wen	no	no		no	14	Thursday	24	9
561	CR561	CR	2007.08.17 10:00	2007.08.17 06:30	2007.08.17 03:00	2007.08.17 10:00	2007	8	17	10:00	2007.08.17	2007.625799	2007.6254	0							0	None	input	near met. site at Carreg Wen	no	no		no	21	Friday	24	10
562	CR562	CR	2007.08.17 17:00	2007.08.17 15:00	2007.08.17 10:00	2007.08.17 17:00	2007	8	17	17:00	2007.08.17	2007.626598	2007.62637	0.14285714	-0.845098						1	None	input	near met. site at Carreg Wen	no	no		no	28	Friday	24	11
563	CR563	CR	2007.08.18 00:00	2007.08.17 21:23	2007.08.17 17:00	2007.08.18 00:00	2007	8	18	00:00	2007.08.18	2007.627397	2007.627099	0.64285714	-0.1918855	6.57	-3.283	-16.433			4.5	None	input	near met. site at Carreg Wen	yes	yes	no	no	35	Friday	24	12	-3.283	-16.433	6.57
564	CR564	CR	2007.08.18 07:00	2007.08.18 03:30	2007.08.18 00:00	2007.08.18 07:00	2007	8	18	07:00	2007.08.18	2007.628196	2007.627797	0.14285714	-0.845098	2.26	-5.168	-29.242			1	None	input	near met. site at Carreg Wen	yes	yes	no	no	7	Saturday	24	13	-5.168	-29.242	2.26
565	CR565	CR	2007.08.18 14:00	2007.08.18 10:03	2007.08.18 07:00	2007.08.18 14:00	2007	8	18	14:00	2007.08.18	2007.628995	2007.628545	1.28571429	0.10914447	1.01	-5.241	-33.822			9	None	input	near met. site at Carreg Wen	yes	yes	no	no	7	Saturday	24	14	-5.241	-33.822	1.01
566	CR566	CR	2007.08.18 21:00	2007.08.18 18:30	2007.08.18 14:00	2007.08.18 21:00	2007	8	18	21:00	2007.08.18	2007.629795	2007.629509	0.57142857	-0.243038	4.16	-3.612	-26.384			4	None	input	near met. site at Carreg Wen	yes	yes	no	no	7	Saturday	24	15	-3.612	-26.384	4.16
567	CR567	CR	2007.08.19 04:00	2007.08.19 00:21	2007.08.18 21:00	2007.08.19 04:00	2007	8	19	04:00	2007.08.19	2007.630594	2007.630178	0.5	-0.30103	2.9	-6.345	-42.29			3.5	None	input	near met. site at Carreg Wen	yes	yes	no	no	7	Saturday	24	16	-6.345	-42.29	2.9
568	CR568	CR	2007.08.19 11:00	2007.08.19 06:30	2007.08.19 04:00	2007.08.19 11:00	2007	8	19	11:00	2007.08.19	2007.631393	2007.630879	0.07142857	-1.146128						0.5	None	input	near met. site at Carreg Wen	no	no		no	7	Sunday	24	17
569	CR569	CR	2007.08.19 18:00	2007.08.19 14:30	2007.08.19 11:00	2007.08.19 18:00	2007	8	19	18:00	2007.08.19	2007.632192	2007.631792	0							0	None	input	near met. site at Carreg Wen	no	no		no	14	Sunday	24	18
570	CR570	CR	2007.08.20 01:00	2007.08.19 21:30	2007.08.19 18:00	2007.08.20 01:00	2007	8	20	01:00	2007.08.20	2007.632991	2007.632591	0							0	None	input	near met. site at Carreg Wen	no	no		no	21	Sunday	24	19
571	CR571	CR	2007.08.20 08:00	2007.08.20 04:30	2007.08.20 01:00	2007.08.20 08:00	2007	8	20	08:00	2007.08.20	2007.63379	2007.63339	0.07142857	-1.146128						0.5	None	input	near met. site at Carreg Wen	no	no		no	28	Monday	24	20
572	CR572	CR	2007.08.20 15:00	2007.08.20 11:30	2007.08.20 08:00	2007.08.20 15:00	2007	8	20	15:00	2007.08.20	2007.634589	2007.63419	0							0	None	input	near met. site at Carreg Wen	no	no		no	35	Monday	24	21
573	CR573	CR	2007.08.20 22:00	2007.08.20 18:30	2007.08.20 15:00	2007.08.20 22:00	2007	8	20	22:00	2007.08.20	2007.635388	2007.634989	0							0	None	input	near met. site at Carreg Wen	no	no		no	42	Monday	24	22
574	CR574	CR	2007.08.21 05:00	2007.08.21 01:30	2007.08.20 22:00	2007.08.21 05:00	2007	8	21	05:00	2007.08.21	2007.636187	2007.635788	0							0	None	input	near met. site at Carreg Wen	no	no		no	49	Monday	24	23
575	CR575	CR	2007.08.21 12:00	2007.08.21 08:30	2007.08.21 05:00	2007.08.21 12:00	2007	8	21	12:00	2007.08.21	2007.636986	2007.636587	0							0	None	input	near met. site at Carreg Wen	no	no		no	56	Tuesday	24	24
576	CR576	CR	2007.08.21 19:00	2007.08.21 15:30	2007.08.21 12:00	2007.08.21 19:00	2007	8	21	19:00	2007.08.21	2007.637785	2007.637386	0							0	No useable rain fall	input	near met. site at Carreg Wen	no	no		no	63	Tuesday	25	1
577	CR577	CR	2007.08.22 02:00	2007.08.21 22:30	2007.08.21 19:00	2007.08.22 02:00	2007	8	22	02:00	2007.08.22	2007.638585	2007.638185	0							0	No useable rain fall	input	near met. site at Carreg Wen	no	no		no	70	Tuesday	25	2
578	CR578	CR	2007.08.22 09:00	2007.08.22 05:30	2007.08.22 02:00	2007.08.22 09:00	2007	8	22	09:00	2007.08.22	2007.639384	2007.638984	0							0	No useable rain fall	input	near met. site at Carreg Wen	no	no		no	77	Wednesday	25	3
579	CR579	CR	2007.08.22 16:00	2007.08.22 12:30	2007.08.22 09:00	2007.08.22 16:00	2007	8	22	16:00	2007.08.22	2007.640183	2007.639783	0							0	No useable rain fall	input	near met. site at Carreg Wen	no	no		no	84	Wednesday	25	4
580	CR580	CR	2007.08.22 23:00	2007.08.22 19:30	2007.08.22 16:00	2007.08.22 23:00	2007	8	22	23:00	2007.08.22	2007.640982	2007.640582	0							0	No useable rain fall	input	near met. site at Carreg Wen	no	no		no	91	Wednesday	25	5
581	CR581	CR	2007.08.23 06:00	2007.08.23 02:30	2007.08.22 23:00	2007.08.23 06:00	2007	8	23	06:00	2007.08.23	2007.641781	2007.641381	0							0	No useable rain fall	input	near met. site at Carreg Wen	no	no		no	98	Wednesday	25	6
582	CR582	CR	2007.08.23 13:00	2007.08.23 09:30	2007.08.23 06:00	2007.08.23 13:00	2007	8	23	13:00	2007.08.23	2007.64258	2007.64218	0							0	No useable rain fall	input	near met. site at Carreg Wen	no	no		no	105	Thursday	25	7
583	CR583	CR	2007.08.23 20:00	2007.08.23 16:30	2007.08.23 13:00	2007.08.23 20:00	2007	8	23	20:00	2007.08.23	2007.643379	2007.64298	0							0	No useable rain fall	input	near met. site at Carreg Wen	no	no		no	112	Thursday	25	8
584	CR584	CR	2007.08.24 03:00	2007.08.23 23:30	2007.08.23 20:00	2007.08.24 03:00	2007	8	24	03:00	2007.08.24	2007.644178	2007.643779	0							0	No useable rain fall	input	near met. site at Carreg Wen	no	no		no	119	Thursday	25	9
585	CR585	CR	2007.08.24 10:00	2007.08.24 06:30	2007.08.24 03:00	2007.08.24 10:00	2007	8	24	10:00	2007.08.24	2007.644977	2007.644578	0							0	No useable rain fall	input	near met. site at Carreg Wen	no	no		no	126	Friday	25	10
586	CR586	CR	2007.08.24 17:00	2007.08.24 13:30	2007.08.24 10:00	2007.08.24 17:00	2007	8	24	17:00	2007.08.24	2007.645776	2007.645377	0							0	No useable rain fall	input	near met. site at Carreg Wen	no	no		no	133	Friday	25	11
587	CR587	CR	2007.08.25 00:00	2007.08.24 20:30	2007.08.24 17:00	2007.08.25 00:00	2007	8	25	00:00	2007.08.25	2007.646575	2007.646176	0							0	No useable rain fall	input	near met. site at Carreg Wen	no	no		no	140	Friday	25	12
588	CR588	CR	2007.08.25 07:00	2007.08.25 03:30	2007.08.25 00:00	2007.08.25 07:00	2007	8	25	07:00	2007.08.25	2007.647374	2007.646975	0							0	No useable rain fall	input	near met. site at Carreg Wen	no	no		no	147	Saturday	25	13
589	CR589	CR	2007.08.25 14:00	2007.08.25 10:30	2007.08.25 07:00	2007.08.25 14:00	2007	8	25	14:00	2007.08.25	2007.648174	2007.647774	0							0	No useable rain fall	input	near met. site at Carreg Wen	no	no		no	154	Saturday	25	14
590	CR590	CR	2007.08.25 21:00	2007.08.25 17:30	2007.08.25 14:00	2007.08.25 21:00	2007	8	25	21:00	2007.08.25	2007.648973	2007.648573	0							0	No useable rain fall	input	near met. site at Carreg Wen	no	no		no	161	Saturday	25	15
591	CR591	CR	2007.08.26 04:00	2007.08.26 00:30	2007.08.25 21:00	2007.08.26 04:00	2007	8	26	04:00	2007.08.26	2007.649772	2007.649372	0							0	No useable rain fall	input	near met. site at Carreg Wen	no	no		no	168	Saturday	25	16
592	CR592	CR	2007.08.26 11:00	2007.08.26 07:30	2007.08.26 04:00	2007.08.26 11:00	2007	8	26	11:00	2007.08.26	2007.650571	2007.650171	0							0	No useable rain fall	input	near met. site at Carreg Wen	no	no		no	175	Sunday	25	17
593	CR593	CR	2007.08.26 18:00	2007.08.26 14:30	2007.08.26 11:00	2007.08.26 18:00	2007	8	26	18:00	2007.08.26	2007.65137	2007.65097	0							0	No useable rain fall	input	near met. site at Carreg Wen	no	no		no	182	Sunday	25	18
594	CR594	CR	2007.08.27 01:00	2007.08.26 21:30	2007.08.26 18:00	2007.08.27 01:00	2007	8	27	01:00	2007.08.27	2007.652169	2007.651769	0							0	No useable rain fall	input	near met. site at Carreg Wen	no	no		no	189	Sunday	25	19
595	CR595	CR	2007.08.27 08:00	2007.08.27 04:30	2007.08.27 01:00	2007.08.27 08:00	2007	8	27	08:00	2007.08.27	2007.652968	2007.652569	0							0	No useable rain fall	input	near met. site at Carreg Wen	no	no		no	196	Monday	25	20
596	CR596	CR	2007.08.27 15:00	2007.08.27 11:30	2007.08.27 08:00	2007.08.27 15:00	2007	8	27	15:00	2007.08.27	2007.653767	2007.653368	0							0	No useable rain fall	input	near met. site at Carreg Wen	no	no		no	203	Monday	25	21
597	CR597	CR	2007.08.27 22:00	2007.08.27 18:30	2007.08.27 15:00	2007.08.27 22:00	2007	8	27	22:00	2007.08.27	2007.654566	2007.654167	0							0	No useable rain fall	input	near met. site at Carreg Wen	no	no		no	210	Monday	25	22
598	CR598	CR	2007.08.28 05:00	2007.08.28 01:30	2007.08.27 22:00	2007.08.28 05:00	2007	8	28	05:00	2007.08.28	2007.655365	2007.654966	0							0	No useable rain fall	input	near met. site at Carreg Wen	no	no		no	217	Monday	25	23
599	CR599	CR	2007.08.28 12:00	2007.08.28 08:30	2007.08.28 05:00	2007.08.28 12:00	2007	8	28	12:00	2007.08.28	2007.656164	2007.655765	0							0	No useable rain fall	input	near met. site at Carreg Wen	no	no		no	224	Tuesday	25	24
600	CR600	CR	2007.08.28 19:00	2007.08.28 15:30	2007.08.28 12:00	2007.08.28 19:00	2007	8	28	19:00	2007.08.28	2007.656964	2007.656564	0							0	None	input	near met. site at Carreg Wen	no	no		no	231	Tuesday	26	1
601	CR601	CR	2007.08.29 02:00	2007.08.28 22:30	2007.08.28 19:00	2007.08.29 02:00	2007	8	29	02:00	2007.08.29	2007.657763	2007.657363	0							0	None	input	near met. site at Carreg Wen	no	no		no	238	Tuesday	26	2
602	CR602	CR	2007.08.29 09:00	2007.08.29 05:30	2007.08.29 02:00	2007.08.29 09:00	2007	8	29	09:00	2007.08.29	2007.658562	2007.658162	0							0	None	input	near met. site at Carreg Wen	no	no		no	245	Wednesday	26	3
603	CR603	CR	2007.08.29 16:00	2007.08.29 12:30	2007.08.29 09:00	2007.08.29 16:00	2007	8	29	16:00	2007.08.29	2007.659361	2007.658961	0							0	None	input	near met. site at Carreg Wen	no	no		no	252	Wednesday	26	4
604	CR604	CR	2007.08.29 23:00	2007.08.29 19:30	2007.08.29 16:00	2007.08.29 23:00	2007	8	29	23:00	2007.08.29	2007.66016	2007.65976	0							0	None	input	near met. site at Carreg Wen	no	no		no	259	Wednesday	26	5
605	CR605	CR	2007.08.30 06:00	2007.08.30 03:00	2007.08.29 23:00	2007.08.30 06:00	2007	8	30	06:00	2007.08.30	2007.660959	2007.660616	0.14285714	-0.845098						1	None	input	near met. site at Carreg Wen	yes	no		no	266	Wednesday	26	6
606	CR606	CR	2007.08.30 13:00	2007.08.30 09:30	2007.08.30 06:00	2007.08.30 13:00	2007	8	30	13:00	2007.08.30	2007.661758	2007.661358	0							0	None	input	near met. site at Carreg Wen	no	no		no	7	Thursday	26	7
607	CR607	CR	2007.08.30 20:00	2007.08.30 16:30	2007.08.30 13:00	2007.08.30 20:00	2007	8	30	20:00	2007.08.30	2007.662557	2007.662158	0							0	None	input	near met. site at Carreg Wen	no	no		no	14	Thursday	26	8
608	CR608	CR	2007.08.31 03:00	2007.08.30 23:30	2007.08.30 20:00	2007.08.31 03:00	2007	8	31	03:00	2007.08.31	2007.663356	2007.662957	0							0	None	input	near met. site at Carreg Wen	no	no		no	21	Thursday	26	9
609	CR609	CR	2007.08.31 10:00	2007.08.31 06:10	2007.08.31 03:00	2007.08.31 10:00	2007	8	31	10:00	2007.08.31	2007.664155	2007.663718	0.21428571	-0.6690068	10.1	-2.913	-16.002			1.5	None	input	near met. site at Carreg Wen	yes	yes	no	no	28	Friday	26	10	-2.913	-16.002	10.1
610	CR610	CR	2007.08.31 17:00	2007.08.31 11:30	2007.08.31 10:00	2007.08.31 17:00	2007	8	31	17:00	2007.08.31	2007.664954	2007.664327	0.07142857	-1.146128	7.62	-1.765	-8.16			0.5	None	input	near met. site at Carreg Wen	yes	yes	no	no	7	Friday	26	11	-1.765	-8.16	7.62
611	CR611	CR	2007.09.01 00:00	2007.08.31 21:50	2007.08.31 17:00	2007.09.01 00:00	2007	9	1	00:00	2007.09.01	2007.665753	2007.665506	0.21428571	-0.6690068		-2.343	-9.659			1.5	None	input	near met. site at Carreg Wen	yes	yes	no	no	7	Friday	26	12	-2.343	-9.659
612	CR612	CR	2007.09.01 07:00	2007.09.01 03:30	2007.09.01 00:00	2007.09.01 07:00	2007	9	1	07:00	2007.09.01	2007.666553	2007.666153	0							0	None	input	near met. site at Carreg Wen	yes	no		no	7	Saturday	26	13
613	CR613	CR	2007.09.01 14:00	2007.09.01 10:30	2007.09.01 07:00	2007.09.01 14:00	2007	9	1	14:00	2007.09.01	2007.667352	2007.666952	0							0	None	input	near met. site at Carreg Wen	no	no		no	7	Saturday	26	14
614	CR614	CR	2007.09.01 21:00	2007.09.01 17:30	2007.09.01 14:00	2007.09.01 21:00	2007	9	1	21:00	2007.09.01	2007.668151	2007.667751	0							0	None	input	near met. site at Carreg Wen	no	no		no	14	Saturday	26	15
615	CR615	CR	2007.09.02 04:00	2007.09.01 23:00	2007.09.01 21:00	2007.09.02 04:00	2007	9	2	04:00	2007.09.02	2007.66895	2007.668379	0.14285714	-0.845098	10.1	-2.607	-10.334			1	None	input	near met. site at Carreg Wen	yes	yes	no	no	21	Saturday	26	16	-2.607	-10.334	10.1
616	CR616	CR	2007.09.02 11:00	2007.09.02 09:51	2007.09.02 04:00	2007.09.02 11:00	2007	9	2	11:00	2007.09.02	2007.669749	2007.669618	1.21428571	0.08432089						8.5	None	input	near met. site at Carreg Wen	no	no		no	7	Sunday	26	17
617	CR617	CR	2007.09.02 18:00	2007.09.02 15:05	2007.09.02 11:00	2007.09.02 18:00	2007	9	2	18:00	2007.09.02	2007.670548	2007.670216	2.42857143	0.38535088	1.06					17	None	input	near met. site at Carreg Wen	yes	no		no	14	Sunday	26	18			1.06
618	CR618	CR	2007.09.03 01:00	2007.09.02 18:30	2007.09.02 18:00	2007.09.03 01:00	2007	9	3	01:00	2007.09.03	2007.671347	2007.670605	0.07142857	-1.146128	1.79	-2.016	-7.995			0.5	None	input	near met. site at Carreg Wen	yes	yes	no	no	7	Sunday	26	19	-2.016	-7.995	1.79
619	CR619	CR	2007.09.03 08:00	2007.09.03 04:30	2007.09.03 01:00	2007.09.03 08:00	2007	9	3	08:00	2007.09.03	2007.672146	2007.671747	0							0	None	input	near met. site at Carreg Wen	no	no		no	7	Monday	26	20
620	CR620	CR	2007.09.03 15:00	2007.09.03 11:30	2007.09.03 08:00	2007.09.03 15:00	2007	9	3	15:00	2007.09.03	2007.672945	2007.672546	0							0	None	input	near met. site at Carreg Wen	no	no		no	14	Monday	26	21
621	CR621	CR	2007.09.03 22:00	2007.09.03 18:30	2007.09.03 15:00	2007.09.03 22:00	2007	9	3	22:00	2007.09.03	2007.673744	2007.673345	0							0	None	input	near met. site at Carreg Wen	no	no		no	21	Monday	26	22
622	CR622	CR	2007.09.04 05:00	2007.09.04 01:30	2007.09.03 22:00	2007.09.04 05:00	2007	9	4	05:00	2007.09.04	2007.674543	2007.674144	0							0	None	input	near met. site at Carreg Wen	no	no		no	28	Monday	26	23
623	CR623	CR	2007.09.04 12:00	2007.09.04 10:30	2007.09.04 05:00	2007.09.04 12:00	2007	9	4	12:00	2007.09.04	2007.675343	2007.675171	0.07142857	-1.146128						0.5	None	input	near met. site at Carreg Wen	no	no		no	35	Tuesday	26	24
624	CR624	CR	2007.09.04 19:00	2007.09.04 15:30	2007.09.04 12:00	2007.09.04 19:00	2007	9	4	19:00	2007.09.04	2007.676142	2007.675742	0							0	None	input	near met. site at Carreg Wen	no	no		no	42	Tuesday	27	1
625	CR625	CR	2007.09.05 02:00	2007.09.04 22:30	2007.09.04 19:00	2007.09.05 02:00	2007	9	5	02:00	2007.09.05	2007.676941	2007.676541	0							0	None	input	near met. site at Carreg Wen	no	no		no	49	Tuesday	27	2
626	CR626	CR	2007.09.05 09:00	2007.09.05 05:30	2007.09.05 02:00	2007.09.05 09:00	2007	9	5	09:00	2007.09.05	2007.67774	2007.67734	0							0	None	input	near met. site at Carreg Wen	no	no		no	56	Wednesday	27	3
627	CR627	CR	2007.09.05 16:00	2007.09.05 12:30	2007.09.05 09:00	2007.09.05 16:00	2007	9	5	16:00	2007.09.05	2007.678539	2007.678139	0							0	None	input	near met. site at Carreg Wen	no	no		no	63	Wednesday	27	4
628	CR628	CR	2007.09.05 23:00	2007.09.05 19:30	2007.09.05 16:00	2007.09.05 23:00	2007	9	5	23:00	2007.09.05	2007.679338	2007.678938	0							0	None	input	near met. site at Carreg Wen	no	no		no	70	Wednesday	27	5
629	CR629	CR	2007.09.06 06:00	2007.09.06 02:30	2007.09.05 23:00	2007.09.06 06:00	2007	9	6	06:00	2007.09.06	2007.680137	2007.679737	0							0	None	input	near met. site at Carreg Wen	no	no		no	77	Wednesday	27	6
630	CR630	CR	2007.09.06 13:00	2007.09.06 09:30	2007.09.06 06:00	2007.09.06 13:00	2007	9	6	13:00	2007.09.06	2007.680936	2007.680537	0							0	None	input	near met. site at Carreg Wen	no	no		no	84	Thursday	27	7
631	CR631	CR	2007.09.06 20:00	2007.09.06 16:30	2007.09.06 13:00	2007.09.06 20:00	2007	9	6	20:00	2007.09.06	2007.681735	2007.681336	0							0	None	input	near met. site at Carreg Wen	no	no		no	91	Thursday	27	8
632	CR632	CR	2007.09.07 03:00	2007.09.06 23:30	2007.09.06 20:00	2007.09.07 03:00	2007	9	7	03:00	2007.09.07	2007.682534	2007.682135	0							0	None	input	near met. site at Carreg Wen	no	no		no	98	Thursday	27	9
633	CR633	CR	2007.09.07 10:00	2007.09.07 06:30	2007.09.07 03:00	2007.09.07 10:00	2007	9	7	10:00	2007.09.07	2007.683333	2007.682934	0							0	None	input	near met. site at Carreg Wen	no	no		no	105	Friday	27	10
634	CR634	CR	2007.09.07 17:00	2007.09.07 13:30	2007.09.07 10:00	2007.09.07 17:00	2007	9	7	17:00	2007.09.07	2007.684132	2007.683733	0			-4.035	-17.67			0	None	input	near met. site at Carreg Wen	no	yes	no	no	112	Friday	27	11	-4.035	-17.67
635	CR635	CR	2007.09.08 00:00	2007.09.07 20:30	2007.09.07 17:00	2007.09.08 00:00	2007	9	8	00:00	2007.09.08	2007.684932	2007.684532	0							0	None	input	near met. site at Carreg Wen	no	no		no	119	Friday	27	12
636	CR636	CR	2007.09.08 07:00	2007.09.08 05:30	2007.09.08 00:00	2007.09.08 07:00	2007	9	8	07:00	2007.09.08	2007.685731	2007.685559	0.07142857	-1.146128		-5.596	-18.794			0.5	None	input	near met. site at Carreg Wen	no	yes	no	no	126	Saturday	27	13	-5.596	-18.794
637	CR637	CR	2007.09.08 14:00	2007.09.08 10:30	2007.09.08 07:00	2007.09.08 14:00	2007	9	8	14:00	2007.09.08	2007.68653	2007.68613	0							0	None	input	near met. site at Carreg Wen	no	no		no	133	Saturday	27	14
638	CR638	CR	2007.09.08 21:00	2007.09.08 17:30	2007.09.08 14:00	2007.09.08 21:00	2007	9	8	21:00	2007.09.08	2007.687329	2007.686929	0							0	None	input	near met. site at Carreg Wen	no	no		no	140	Saturday	27	15
639	CR639	CR	2007.09.09 04:00	2007.09.09 00:30	2007.09.08 21:00	2007.09.09 04:00	2007	9	9	04:00	2007.09.09	2007.688128	2007.687728	0							0	None	input	near met. site at Carreg Wen	no	no		no	147	Saturday	27	16
640	CR640	CR	2007.09.09 11:00	2007.09.09 07:30	2007.09.09 04:00	2007.09.09 11:00	2007	9	9	11:00	2007.09.09	2007.688927	2007.688527	0							0	None	input	near met. site at Carreg Wen	no	no		no	154	Sunday	27	17
641	CR641	CR	2007.09.09 18:00	2007.09.09 14:30	2007.09.09 11:00	2007.09.09 18:00	2007	9	9	18:00	2007.09.09	2007.689726	2007.689327	0			-4.657	-23.768			0	None	input	near met. site at Carreg Wen	no	yes	no	no	161	Sunday	27	18	-4.657	-23.768
642	CR642	CR	2007.09.10 01:00	2007.09.09 21:30	2007.09.09 18:00	2007.09.10 01:00	2007	9	10	01:00	2007.09.10	2007.690525	2007.690126	0							0	None	input	near met. site at Carreg Wen	no	no		no	168	Sunday	27	19
643	CR643	CR	2007.09.10 08:00	2007.09.10 04:30	2007.09.10 01:00	2007.09.10 08:00	2007	9	10	08:00	2007.09.10	2007.691324	2007.690925	0			-6.207	-33.257			0	None	input	near met. site at Carreg Wen	no	yes	no	no	175	Monday	27	20	-6.207	-33.257
644	CR644	CR	2007.09.10 15:00	2007.09.10 11:30	2007.09.10 08:00	2007.09.10 15:00	2007	9	10	15:00	2007.09.10	2007.692123	2007.691724	0							0	None	input	near met. site at Carreg Wen	no	no		no	182	Monday	27	21
645	CR645	CR	2007.09.10 22:00	2007.09.10 18:30	2007.09.10 15:00	2007.09.10 22:00	2007	9	10	22:00	2007.09.10	2007.692922	2007.692523	0							0	None	input	near met. site at Carreg Wen	no	no		no	189	Monday	27	22
646	CR646	CR	2007.09.11 05:00	2007.09.11 01:30	2007.09.10 22:00	2007.09.11 05:00	2007	9	11	05:00	2007.09.11	2007.693722	2007.693322	0			-7.337	-40.366			0	None	input	near met. site at Carreg Wen	no	yes	no	no	196	Monday	27	23	-7.337	-40.366
647	CR647	CR	2007.09.11 12:00	2007.09.11 11:30	2007.09.11 05:00	2007.09.11 12:00	2007	9	11	12:00	2007.09.11	2007.694521	2007.694464	0.07142857	-1.146128						0.5	100+ dead flying ants in collector	input	near met. site at Carreg Wen	no	no		no	203	Tuesday	27	24
648	CR648	CR	2007.09.11 19:00	2007.09.11 15:30	2007.09.11 12:00	2007.09.11 19:00	2007	9	11	19:00	2007.09.11	2007.69532	2007.69492	0							0	None	input	near met. site at Carreg Wen	no	no		no	210	Tuesday	28	1
649	CR649	CR	2007.09.12 02:00	2007.09.11 22:30	2007.09.11 19:00	2007.09.12 02:00	2007	9	12	02:00	2007.09.12	2007.696119	2007.695719	0							0	None	input	near met. site at Carreg Wen	no	no		no	217	Tuesday	28	2
650	CR650	CR	2007.09.12 09:00	2007.09.12 05:30	2007.09.12 02:00	2007.09.12 09:00	2007	9	12	09:00	2007.09.12	2007.696918	2007.696518	0							0	None	input	near met. site at Carreg Wen	no	no		no	224	Wednesday	28	3
651	CR651	CR	2007.09.12 16:00	2007.09.12 12:30	2007.09.12 09:00	2007.09.12 16:00	2007	9	12	16:00	2007.09.12	2007.697717	2007.697317	0							0	None	input	near met. site at Carreg Wen	no	no		no	231	Wednesday	28	4
652	CR652	CR	2007.09.12 23:00	2007.09.12 19:30	2007.09.12 16:00	2007.09.12 23:00	2007	9	12	23:00	2007.09.12	2007.698516	2007.698116	0							0	None	input	near met. site at Carreg Wen	no	no		no	238	Wednesday	28	5
653	CR653	CR	2007.09.13 06:00	2007.09.13 02:30	2007.09.12 23:00	2007.09.13 06:00	2007	9	13	06:00	2007.09.13	2007.699315	2007.698916	0							0	None	input	near met. site at Carreg Wen	no	no		no	245	Wednesday	28	6
654	CR654	CR	2007.09.13 13:00	2007.09.13 09:30	2007.09.13 06:00	2007.09.13 13:00	2007	9	13	13:00	2007.09.13	2007.700114	2007.699715	0							0	None	input	near met. site at Carreg Wen	no	no		no	252	Thursday	28	7
655	CR655	CR	2007.09.13 20:00	2007.09.13 16:30	2007.09.13 13:00	2007.09.13 20:00	2007	9	13	20:00	2007.09.13	2007.700913	2007.700514	0							0	None	input	near met. site at Carreg Wen	no	no		no	259	Thursday	28	8
656	CR656	CR	2007.09.14 03:00	2007.09.13 23:30	2007.09.13 20:00	2007.09.14 03:00	2007	9	14	03:00	2007.09.14	2007.701712	2007.701313	0							0	None	input	near met. site at Carreg Wen	no	no		no	266	Thursday	28	9
657	CR657	CR	2007.09.14 10:00	2007.09.14 05:21	2007.09.14 03:00	2007.09.14 10:00	2007	9	14	10:00	2007.09.14	2007.702511	2007.701981	1	0	10.9					7	None	input	near met. site at Carreg Wen	yes	no		yes	273	Friday	28	10			10.9
658	CR658	CR	2007.09.14 17:00	2007.09.14 13:30	2007.09.14 10:00	2007.09.14 17:00	2007	9	14	17:00	2007.09.14	2007.703311	2007.702911	0		1.32					0	None	input	near met. site at Carreg Wen	yes	no		no	7	Friday	28	11			1.32
659	CR659	CR	2007.09.15 00:00	2007.09.14 20:30	2007.09.14 17:00	2007.09.15 00:00	2007	9	15	00:00	2007.09.15	2007.70411	2007.70371	0							0	None	input	near met. site at Carreg Wen	no	no		no	7	Friday	28	12
660	CR660	CR	2007.09.15 07:00	2007.09.15 03:30	2007.09.15 00:00	2007.09.15 07:00	2007	9	15	07:00	2007.09.15	2007.704909	2007.704509	0.07142857	-1.146128						0.5	None	input	near met. site at Carreg Wen	yes	no		no	14	Saturday	28	13
661	CR661	CR	2007.09.15 14:00	2007.09.15 10:30	2007.09.15 07:00	2007.09.15 14:00	2007	9	15	14:00	2007.09.15	2007.705708	2007.705308	0							0	None	input	near met. site at Carreg Wen	yes	no		no	7	Saturday	28	14
662	CR662	CR	2007.09.15 21:00	2007.09.15 17:30	2007.09.15 14:00	2007.09.15 21:00	2007	9	15	21:00	2007.09.15	2007.706507	2007.706107	0							0	None	input	near met. site at Carreg Wen	no	no		no	7	Saturday	28	15
663	CR663	CR	2007.09.16 04:00	2007.09.16 00:30	2007.09.15 21:00	2007.09.16 04:00	2007	9	16	04:00	2007.09.16	2007.707306	2007.706906	0							0	None	input	near met. site at Carreg Wen	no	no		no	14	Saturday	28	16
664	CR664	CR	2007.09.16 11:00	2007.09.16 07:30	2007.09.16 04:00	2007.09.16 11:00	2007	9	16	11:00	2007.09.16	2007.708105	2007.707706	0							0	None	input	near met. site at Carreg Wen	no	no		no	21	Sunday	28	17
665	CR665	CR	2007.09.16 18:00	2007.09.16 14:38	2007.09.16 11:00	2007.09.16 18:00	2007	9	16	18:00	2007.09.16	2007.708904	2007.70852	2.07142857	0.31626996	0.96					14.5	None	input	near met. site at Carreg Wen	yes	no		no	28	Sunday	28	18			0.96
666	CR666	CR	2007.09.17 01:00	2007.09.16 23:00	2007.09.16 18:00	2007.09.17 01:00	2007	9	17	01:00	2007.09.17	2007.709703	2007.709475	0.14285714	-0.845098						1	None	input	near met. site at Carreg Wen	yes	no		no	7	Sunday	28	19
667	CR667	CR	2007.09.17 08:00	2007.09.17 03:30	2007.09.17 01:00	2007.09.17 08:00	2007	9	17	08:00	2007.09.17	2007.710502	2007.709989	0.14285714	-0.845098	11.3					1	None	input	near met. site at Carreg Wen	yes	no		no	7	Monday	28	20			11.3
668	CR668	CR	2007.09.17 15:00	2007.09.17 11:30	2007.09.17 08:00	2007.09.17 15:00	2007	9	17	15:00	2007.09.17	2007.711301	2007.710902	0							0	None	input	near met. site at Carreg Wen	no	no		no	7	Monday	28	21
669	CR669	CR	2007.09.17 22:00	2007.09.17 17:30	2007.09.17 15:00	2007.09.17 22:00	2007	9	17	22:00	2007.09.17	2007.712101	2007.711587	0.07142857	-1.146128						0.5	None	input	near met. site at Carreg Wen	yes	no		no	14	Monday	28	22
670	CR670	CR	2007.09.18 05:00	2007.09.18 00:30	2007.09.17 22:00	2007.09.18 05:00	2007	9	18	05:00	2007.09.18	2007.7129	2007.712386	0.07142857	-1.146128						0.5	None	input	near met. site at Carreg Wen	yes	no		no	7	Monday	28	23
671	CR671	CR	2007.09.18 12:00	2007.09.18 08:30	2007.09.18 05:00	2007.09.18 12:00	2007	9	18	12:00	2007.09.18	2007.713699	2007.713299	0							0	None	input	near met. site at Carreg Wen	no	no		no	7	Tuesday	28	24
672	CR672	CR	2007.09.18 19:00	2007.09.18 15:30	2007.09.18 12:00	2007.09.18 19:00	2007	9	18	19:00	2007.09.18	2007.714498	2007.714098	0							0	shift in samples corrected	input	near met. site at Carreg Wen	no	no		no	14	Tuesday	29	1
673	CR673	CR	2007.09.19 02:00	2007.09.19 00:24	2007.09.18 19:00	2007.09.19 02:00	2007	9	19	02:00	2007.09.19	2007.715297	2007.715115	0.78571429	-0.1047354	14.5	-4.02	-11.664			5.5	None	input	near met. site at Carreg Wen	yes	yes	no	no	7	Tuesday	29	2	-4.02	-11.664	14.5
674	CR674	CR	2007.09.19 09:00	2007.09.19 06:23	2007.09.19 02:00	2007.09.19 09:00	2007	9	19	09:00	2007.09.19	2007.716096	2007.715798	3.78571429	0.57814783	5.3	-3.439	-7.852			26.5	None	input	near met. site at Carreg Wen	yes	yes	no	no	7	Wednesday	29	3	-3.439	-7.852	5.3
675	CR675	CR	2007.09.19 16:00	2007.09.19 12:15	2007.09.19 09:00	2007.09.19 16:00	2007	9	19	16:00	2007.09.19	2007.716895	2007.716468	3.57142857	0.55284197	4.73	-2.633	-4.979			25	None	input	near met. site at Carreg Wen	yes	yes	no	no	7	Wednesday	29	4	-2.633	-4.979	4.73
676	CR676	CR	2007.09.19 23:00	2007.09.19 19:25	2007.09.19 16:00	2007.09.19 23:00	2007	9	19	23:00	2007.09.19	2007.717694	2007.717286	4.64285714	0.66678532	5.35	-2.343	-6.95			32.5	None	input	near met. site at Carreg Wen	yes	yes	no	no	7	Wednesday	29	5	-2.343	-6.95	5.35
677	CR677	CR	2007.09.20 06:00	2007.09.20 03:01	2007.09.19 23:00	2007.09.20 06:00	2007	9	20	06:00	2007.09.20	2007.718493	2007.718153	1.5	0.17609126	7.46	-2.811	-11.563			10.5	None	input	near met. site at Carreg Wen	yes	yes	no	no	7	Wednesday	29	6	-2.811	-11.563	7.46
678	CR678	CR	2007.09.20 13:00	2007.09.20 07:30	2007.09.20 06:00	2007.09.20 13:00	2007	9	20	13:00	2007.09.20	2007.719292	2007.718664	0.07142857	-1.146128	7.13	-1.349	-1.197			0.5	None	input	near met. site at Carreg Wen	yes	yes	no	no	7	Thursday	29	7	-1.349	-1.197	7.13
679	CR679	CR	2007.09.20 20:00	2007.09.20 16:30	2007.09.20 13:00	2007.09.20 20:00	2007	9	20	20:00	2007.09.20	2007.720091	2007.719692	0							0	None	input	near met. site at Carreg Wen	no	no		no	14	Thursday	29	8
680	CR680	CR	2007.09.21 03:00	2007.09.21 00:47	2007.09.20 20:00	2007.09.21 03:00	2007	9	21	03:00	2007.09.21	2007.72089	2007.720639	1.21428571	0.08432089	1.75	-3.328	-12.185			8.5	None	input	near met. site at Carreg Wen	yes	yes	no	no	7	Thursday	29	9	-3.328	-12.185	1.75
681	CR681	CR	2007.09.21 10:00	2007.09.21 06:50	2007.09.21 03:00	2007.09.21 10:00	2007	9	21	10:00	2007.09.21	2007.72169	2007.721328	1.71428571	0.23408321	1.59	-2.638	-7.231			12	None	input	near met. site at Carreg Wen	yes	yes	no	no	7	Friday	29	10	-2.638	-7.231	1.59
682	CR682	CR	2007.09.21 17:00	2007.09.21 11:40	2007.09.21 10:00	2007.09.21 17:00	2007	9	21	17:00	2007.09.21	2007.722489	2007.72188	0.85714286	-0.0669468	2.47	-5.791	-35.932			6	None	input	near met. site at Carreg Wen	yes	yes	no	no	7	Friday	29	11	-5.791	-35.932	2.47
683	CR683	CR	2007.09.22 00:00	2007.09.21 20:30	2007.09.21 17:00	2007.09.22 00:00	2007	9	22	00:00	2007.09.22	2007.723288	2007.722888	0							0	None	input	near met. site at Carreg Wen	no	no		no	14	Friday	29	12
684	CR684	CR	2007.09.22 07:00	2007.09.22 03:30	2007.09.22 00:00	2007.09.22 07:00	2007	9	22	07:00	2007.09.22	2007.724087	2007.723687	0							0	None	input	near met. site at Carreg Wen	no	no		no	21	Saturday	29	13
685	CR685	CR	2007.09.22 14:00	2007.09.22 09:50	2007.09.22 07:00	2007.09.22 14:00	2007	9	22	14:00	2007.09.22	2007.724886	2007.72441	0.21428571	-0.6690068	7.36	-4.735	-28.589			1.5	None	input	near met. site at Carreg Wen	yes	yes	no	no	7	Saturday	29	14	-4.735	-28.589	7.36
686	CR686	CR	2007.09.22 21:00	2007.09.22 14:30	2007.09.22 14:00	2007.09.22 21:00	2007	9	22	21:00	2007.09.22	2007.725685	2007.724943	0.07142857	-1.146128						0.5	None	input	near met. site at Carreg Wen	no	no		no	14	Saturday	29	15
687	CR687	CR	2007.09.23 04:00	2007.09.23 00:30	2007.09.22 21:00	2007.09.23 04:00	2007	9	23	04:00	2007.09.23	2007.726484	2007.726085	0							0	None	input	near met. site at Carreg Wen	no	no		no	21	Saturday	29	16
688	CR688	CR	2007.09.23 11:00	2007.09.23 07:43	2007.09.23 04:00	2007.09.23 11:00	2007	9	23	11:00	2007.09.23	2007.727283	2007.72691	0.92857143	-0.0321847	1.13	-3.448	-16.704			6.5	None	input	near met. site at Carreg Wen	yes	yes	no	no	7	Sunday	29	17	-3.448	-16.704	1.13
689	CR689	CR	2007.09.23 18:00	2007.09.23 13:10	2007.09.23 11:00	2007.09.23 18:00	2007	9	23	18:00	2007.09.23	2007.728082	2007.72753	0.42857143	-0.3679768	3.12	-1.411	-4.875			3	None	input	near met. site at Carreg Wen	yes	yes	no	no	7	Sunday	29	18	-1.411	-4.875	3.12
690	CR690	CR	2007.09.24 01:00	2007.09.24 00:18	2007.09.23 18:00	2007.09.24 01:00	2007	9	24	01:00	2007.09.24	2007.728881	2007.728801	1.07142857	0.02996322						7.5	None	input	near met. site at Carreg Wen	no	no		no	14	Sunday	29	19
691	CR691	CR	2007.09.24 08:00	2007.09.24 02:34	2007.09.24 01:00	2007.09.24 08:00	2007	9	24	08:00	2007.09.24	2007.72968	2007.729061	4.07142857	0.60974682	2.6	-9.335	-58.062			28.5	None	input	near met. site at Carreg Wen	yes	yes	no	no	7	Monday	29	20	-9.335	-58.062	2.6
692	CR692	CR	2007.09.24 15:00	2007.09.24 09:51	2007.09.24 08:00	2007.09.24 15:00	2007	9	24	15:00	2007.09.24	2007.73048	2007.729892	1	0	27.7	-6.25	-32.677			7	None	input	near met. site at Carreg Wen	yes	yes	no	yes	7	Monday	29	21	-6.25	-32.677	27.7
693	CR693	CR	2007.09.24 22:00	2007.09.24 17:14	2007.09.24 15:00	2007.09.24 22:00	2007	9	24	22:00	2007.09.24	2007.731279	2007.730734	1.07142857	0.02996322	17	-7.424	-38.659			7.5	None	input	near met. site at Carreg Wen	yes	yes	no	no	7	Monday	29	22	-7.424	-38.659	17
694	CR694	CR	2007.09.25 05:00	2007.09.25 01:42	2007.09.24 22:00	2007.09.25 05:00	2007	9	25	05:00	2007.09.25	2007.732078	2007.731702	2.07142857	0.31626996	12.8	-5.614	-27.887			14.5	None	input	near met. site at Carreg Wen	yes	yes	no	no	7	Monday	29	23	-5.614	-27.887	12.8
695	CR695	CR	2007.09.25 12:00	2007.09.25 06:48	2007.09.25 05:00	2007.09.25 12:00	2007	9	25	12:00	2007.09.25	2007.732877	2007.732284	1.64285714	0.2155998	11.8	-5.185	-26.213			11.5	None	input	near met. site at Carreg Wen	yes	yes	no	no	7	Tuesday	29	24	-5.185	-26.213	11.8
696	CR696	CR	2007.09.25 19:00	2007.09.25 15:30	2007.09.25 12:00	2007.09.25 19:00	2007	9	25	19:00	2007.09.25	2007.733676	2007.733276	0							0	None	input	near met. site at Carreg Wen	no	no		no	14	Tuesday	30	1
697	CR697	CR	2007.09.26 02:00	2007.09.25 22:30	2007.09.25 19:00	2007.09.26 02:00	2007	9	26	02:00	2007.09.26	2007.734475	2007.734075	0							0	None	input	near met. site at Carreg Wen	no	no		no	21	Tuesday	30	2
698	CR698	CR	2007.09.26 09:00	2007.09.26 07:22	2007.09.26 02:00	2007.09.26 09:00	2007	9	26	09:00	2007.09.26	2007.735274	2007.735089	0.57142857	-0.243038	5.97	-6.646	-37.12			4	None	input	near met. site at Carreg Wen	yes	yes	no	no	7	Wednesday	30	3	-6.646	-37.12	5.97
699	CR699	CR	2007.09.26 16:00	2007.09.26 09:30	2007.09.26 09:00	2007.09.26 16:00	2007	9	26	16:00	2007.09.26	2007.736073	2007.735331	0.07142857	-1.146128	0.62	-7.368	-42.296			0.5	None	input	near met. site at Carreg Wen	yes	yes	no	no	7	Wednesday	30	4	-7.368	-42.296	0.62
700	CR700	CR	2007.09.26 23:00	2007.09.26 19:30	2007.09.26 16:00	2007.09.26 23:00	2007	9	26	23:00	2007.09.26	2007.736872	2007.736473	0							0	None	input	near met. site at Carreg Wen	no	no		no	14	Wednesday	30	5
701	CR701	CR	2007.09.27 06:00	2007.09.27 02:30	2007.09.26 23:00	2007.09.27 06:00	2007	9	27	06:00	2007.09.27	2007.737671	2007.737272	0							0	None	input	near met. site at Carreg Wen	no	no		no	21	Wednesday	30	6
702	CR702	CR	2007.09.27 13:00	2007.09.27 09:30	2007.09.27 06:00	2007.09.27 13:00	2007	9	27	13:00	2007.09.27	2007.73847	2007.738071	0							0	None	input	near met. site at Carreg Wen	no	no		no	28	Thursday	30	7
703	CR703	CR	2007.09.27 20:00	2007.09.27 16:30	2007.09.27 13:00	2007.09.27 20:00	2007	9	27	20:00	2007.09.27	2007.739269	2007.73887	0							0	None	input	near met. site at Carreg Wen	no	no		no	35	Thursday	30	8
704	CR704	CR	2007.09.28 03:00	2007.09.28 02:30	2007.09.27 20:00	2007.09.28 03:00	2007	9	28	03:00	2007.09.28	2007.740069	2007.740011	0.07142857	-1.146128						0.5	None	input	near met. site at Carreg Wen	no	no		no	42	Thursday	30	9
705	CR705	CR	2007.09.28 10:00	2007.09.28 06:30	2007.09.28 03:00	2007.09.28 10:00	2007	9	28	10:00	2007.09.28	2007.740868	2007.740468	0							0	None	input	near met. site at Carreg Wen	no	no		no	49	Friday	30	10
706	CR706	CR	2007.09.28 17:00	2007.09.28 13:30	2007.09.28 10:00	2007.09.28 17:00	2007	9	28	17:00	2007.09.28	2007.741667	2007.741267	0							0	None	input	near met. site at Carreg Wen	no	no		no	56	Friday	30	11
707	CR707	CR	2007.09.29 00:00	2007.09.28 20:30	2007.09.28 17:00	2007.09.29 00:00	2007	9	29	00:00	2007.09.29	2007.742466	2007.742066	0							0	None	input	near met. site at Carreg Wen	no	no		no	63	Friday	30	12
708	CR708	CR	2007.09.29 07:00	2007.09.29 03:30	2007.09.29 00:00	2007.09.29 07:00	2007	9	29	07:00	2007.09.29	2007.743265	2007.742865	0.07142857	-1.146128						0.5	None	input	near met. site at Carreg Wen	no	no		no	70	Saturday	30	13
709	CR709	CR	2007.09.29 14:00	2007.09.29 10:30	2007.09.29 07:00	2007.09.29 14:00	2007	9	29	14:00	2007.09.29	2007.744064	2007.743664	0							0	None	input	near met. site at Carreg Wen	no	no		no	77	Saturday	30	14
710	CR710	CR	2007.09.29 21:00	2007.09.29 17:30	2007.09.29 14:00	2007.09.29 21:00	2007	9	29	21:00	2007.09.29	2007.744863	2007.744464	0							0	None	input	near met. site at Carreg Wen	no	no		no	84	Saturday	30	15
711	CR711	CR	2007.09.30 04:00	2007.09.30 00:30	2007.09.29 21:00	2007.09.30 04:00	2007	9	30	04:00	2007.09.30	2007.745662	2007.745263	0							0	None	input	near met. site at Carreg Wen	no	no		no	91	Saturday	30	16
712	CR712	CR	2007.09.30 11:00	2007.09.30 07:30	2007.09.30 04:00	2007.09.30 11:00	2007	9	30	11:00	2007.09.30	2007.746461	2007.746062	0							0	None	input	near met. site at Carreg Wen	no	no		no	98	Sunday	30	17
713	CR713	CR	2007.09.30 18:00	2007.09.30 14:30	2007.09.30 11:00	2007.09.30 18:00	2007	9	30	18:00	2007.09.30	2007.74726	2007.746861	0							0	None	input	near met. site at Carreg Wen	no	no		no	105	Sunday	30	18
714	CR714	CR	2007.10.01 01:00	2007.09.30 23:30	2007.09.30 18:00	2007.10.01 01:00	2007	10	1	01:00	2007.10.01	2007.748059	2007.747888	0.07142857	-1.146128						0.5	None	input	near met. site at Carreg Wen	no	no		no	112	Sunday	30	19
715	CR715	CR	2007.10.01 08:00	2007.10.01 02:30	2007.10.01 01:00	2007.10.01 08:00	2007	10	1	08:00	2007.10.01	2007.748858	2007.748231	0.07142857	-1.146128						0.5	None	input	near met. site at Carreg Wen	yes	no		no	7	Monday	30	20
716	CR716	CR	2007.10.01 15:00	2007.10.01 10:10	2007.10.01 08:00	2007.10.01 15:00	2007	10	1	15:00	2007.10.01	2007.749658	2007.749106	0.21428571	-0.6690068	1.61	-6.799	-41.626			1.5	None	input	near met. site at Carreg Wen	yes	yes	no	no	7	Monday	30	21	-6.799	-41.626	1.61
717	CR717	CR	2007.10.01 22:00	2007.10.01 18:30	2007.10.01 15:00	2007.10.01 22:00	2007	10	1	22:00	2007.10.01	2007.750457	2007.750057	0.07142857	-1.146128						0.5	None	input	near met. site at Carreg Wen	no	no		no	14	Monday	30	22
718	CR718	CR	2007.10.02 05:00	2007.10.02 01:30	2007.10.01 22:00	2007.10.02 05:00	2007	10	2	05:00	2007.10.02	2007.751256	2007.750856	0							0	None	input	near met. site at Carreg Wen	no	no		no	21	Monday	30	23
719	CR719	CR	2007.10.02 12:00	2007.10.02 08:30	2007.10.02 05:00	2007.10.02 12:00	2007	10	2	12:00	2007.10.02	2007.752055	2007.751655	0							0	None	input	near met. site at Carreg Wen	no	no		no	28	Tuesday	30	24
720	CR720	CR	2007.10.02 19:00	2007.10.02 15:30	2007.10.02 12:00	2007.10.02 19:00	2007	10	2	19:00	2007.10.02	2007.752854	2007.752454	0							0	None	input	near met. site at Carreg Wen	no	no		no	35	Tuesday	31	1
721	CR721	CR	2007.10.03 02:00	2007.10.02 22:30	2007.10.02 19:00	2007.10.03 02:00	2007	10	3	02:00	2007.10.03	2007.753653	2007.753253	0		2.35	-5.235	-27.698			0	None	input	near met. site at Carreg Wen	yes	yes	no	no	7	Tuesday	31	2	-5.235	-27.698	2.35
722	CR722	CR	2007.10.03 09:00	2007.10.03 05:30	2007.10.03 02:00	2007.10.03 09:00	2007	10	3	09:00	2007.10.03	2007.754452	2007.754053	0							0	None	input	near met. site at Carreg Wen	no	no		no	14	Wednesday	31	3
723	CR723	CR	2007.10.03 16:00	2007.10.03 12:50	2007.10.03 09:00	2007.10.03 16:00	2007	10	3	16:00	2007.10.03	2007.755251	2007.75489	0.21428571	-0.6690068						1.5	None	input	near met. site at Carreg Wen	yes	no		no	7	Wednesday	31	4
724	CR724	CR	2007.10.03 23:00	2007.10.03 17:57	2007.10.03 16:00	2007.10.03 23:00	2007	10	3	23:00	2007.10.03	2007.75605	2007.755475	0.92857143	-0.0321847	1.91	-4.826	-29.083			6.5	None	input	near met. site at Carreg Wen	yes	yes	no	no	7	Wednesday	31	5	-4.826	-29.083	1.91
725	CR725	CR	2007.10.04 06:00	2007.10.04 02:30	2007.10.03 23:00	2007.10.04 06:00	2007	10	4	06:00	2007.10.04	2007.756849	2007.75645	0							0	None	input	near met. site at Carreg Wen	no	no		no	14	Wednesday	31	6
726	CR726	CR	2007.10.04 13:00	2007.10.04 09:30	2007.10.04 06:00	2007.10.04 13:00	2007	10	4	13:00	2007.10.04	2007.757648	2007.757249	0		0.9	-4.802	-25.29			0	None	input	near met. site at Carreg Wen	yes	yes	no	no	7	Thursday	31	7	-4.802	-25.29	0.9
727	CR727	CR	2007.10.04 20:00	2007.10.04 16:30	2007.10.04 13:00	2007.10.04 20:00	2007	10	4	20:00	2007.10.04	2007.758448	2007.758048	0							0	None	input	near met. site at Carreg Wen	no	no		no	14	Thursday	31	8
728	CR728	CR	2007.10.05 03:00	2007.10.04 23:30	2007.10.04 20:00	2007.10.05 03:00	2007	10	5	03:00	2007.10.05	2007.759247	2007.758847	0							0	None	input	near met. site at Carreg Wen	no	no		no	21	Thursday	31	9
729	CR729	CR	2007.10.05 10:00	2007.10.05 08:30	2007.10.05 03:00	2007.10.05 10:00	2007	10	5	10:00	2007.10.05	2007.760046	2007.759874	0.07142857	-1.146128						0.5	None	input	near met. site at Carreg Wen	no	no		no	28	Friday	31	10
730	CR730	CR	2007.10.05 17:00	2007.10.05 13:30	2007.10.05 10:00	2007.10.05 17:00	2007	10	5	17:00	2007.10.05	2007.760845	2007.760445	0							0	None	input	near met. site at Carreg Wen	no	no		no	35	Friday	31	11
731	CR731	CR	2007.10.06 00:00	2007.10.05 20:30	2007.10.05 17:00	2007.10.06 00:00	2007	10	6	00:00	2007.10.06	2007.761644	2007.761244	0							0	None	input	near met. site at Carreg Wen	no	no		no	42	Friday	31	12
732	CR732	CR	2007.10.06 07:00	2007.10.06 03:30	2007.10.06 00:00	2007.10.06 07:00	2007	10	6	07:00	2007.10.06	2007.762443	2007.762043	0							0	None	input	near met. site at Carreg Wen	no	no		no	49	Saturday	31	13
733	CR733	CR	2007.10.06 14:00	2007.10.06 10:30	2007.10.06 07:00	2007.10.06 14:00	2007	10	6	14:00	2007.10.06	2007.763242	2007.762843	0							0	None	input	near met. site at Carreg Wen	no	no		no	56	Saturday	31	14
734	CR734	CR	2007.10.06 21:00	2007.10.06 17:30	2007.10.06 14:00	2007.10.06 21:00	2007	10	6	21:00	2007.10.06	2007.764041	2007.763642	0							0	None	input	near met. site at Carreg Wen	no	no		no	63	Saturday	31	15
735	CR735	CR	2007.10.07 04:00	2007.10.07 00:30	2007.10.06 21:00	2007.10.07 04:00	2007	10	7	04:00	2007.10.07	2007.76484	2007.764441	0							0	None	input	near met. site at Carreg Wen	no	no		no	70	Saturday	31	16
736	CR736	CR	2007.10.07 11:00	2007.10.07 07:30	2007.10.07 04:00	2007.10.07 11:00	2007	10	7	11:00	2007.10.07	2007.765639	2007.76524	0							0	None	input	near met. site at Carreg Wen	no	no		no	77	Sunday	31	17
737	CR737	CR	2007.10.07 18:00	2007.10.07 14:30	2007.10.07 11:00	2007.10.07 18:00	2007	10	7	18:00	2007.10.07	2007.766438	2007.766039	0							0	None	input	near met. site at Carreg Wen	no	no		no	84	Sunday	31	18
738	CR738	CR	2007.10.08 01:00	2007.10.07 21:30	2007.10.07 18:00	2007.10.08 01:00	2007	10	8	01:00	2007.10.08	2007.767237	2007.766838	0							0	None	input	near met. site at Carreg Wen	no	no		no	91	Sunday	31	19
739	CR739	CR	2007.10.08 08:00	2007.10.08 04:30	2007.10.08 01:00	2007.10.08 08:00	2007	10	8	08:00	2007.10.08	2007.768037	2007.767637	0							0	None	input	near met. site at Carreg Wen	no	no		no	98	Monday	31	20
740	CR740	CR	2007.10.08 15:00	2007.10.08 11:30	2007.10.08 08:00	2007.10.08 15:00	2007	10	8	15:00	2007.10.08	2007.768836	2007.768436	0							0	None	input	near met. site at Carreg Wen	no	no		no	105	Monday	31	21
741	CR741	CR	2007.10.08 22:00	2007.10.08 20:30	2007.10.08 15:00	2007.10.08 22:00	2007	10	8	22:00	2007.10.08	2007.769635	2007.769464	0.14285714	-0.845098		-4.222	-20.105			1	None	input	near met. site at Carreg Wen	yes	yes	no	no	7	Monday	31	22	-4.222	-20.105
742	CR742	CR	2007.10.09 05:00	2007.10.09 02:47	2007.10.08 22:00	2007.10.09 05:00	2007	10	9	05:00	2007.10.09	2007.770434	2007.770181	2.5	0.39794001	1.07	-4.724	-24.444			17.5	None	input	near met. site at Carreg Wen	yes	yes	no	no	7	Monday	31	23	-4.724	-24.444	1.07
743	CR743	CR	2007.10.09 12:00	2007.10.09 09:58	2007.10.09 05:00	2007.10.09 12:00	2007	10	9	12:00	2007.10.09	2007.771233	2007.771002	1.78571429	0.25181197	3.65	-5.639	-30.252			12.5	None	input	near met. site at Carreg Wen	yes	yes	no	no	7	Tuesday	31	24	-5.639	-30.252	3.65
744	CR744	CR	2007.10.09 19:00	2007.10.09 14:10	2007.10.09 12:00	2007.10.09 19:00	2007	10	9	19:00	2007.10.09	2007.772032	2007.77148	0.21428571	-0.6690068	4.25	-5.045	-27.001			1.5	None	input	near met. site at Carreg Wen	yes	yes	no	no	7	Tuesday	32	1	-5.045	-27.001	4.25
745	CR745	CR	2007.10.10 02:00	2007.10.09 22:30	2007.10.09 19:00	2007.10.10 02:00	2007	10	10	02:00	2007.10.10	2007.772831	2007.772432	0							0	None	input	near met. site at Carreg Wen	no	no		no	14	Tuesday	32	2
746	CR746	CR	2007.10.10 09:00	2007.10.10 05:30	2007.10.10 02:00	2007.10.10 09:00	2007	10	10	09:00	2007.10.10	2007.77363	2007.773231	0							0	None	input	near met. site at Carreg Wen	no	no		no	21	Wednesday	32	3
747	CR747	CR	2007.10.10 16:00	2007.10.10 12:30	2007.10.10 09:00	2007.10.10 16:00	2007	10	10	16:00	2007.10.10	2007.774429	2007.77403	0							0	None	input	near met. site at Carreg Wen	no	no		no	28	Wednesday	32	4
748	CR748	CR	2007.10.10 23:00	2007.10.10 19:30	2007.10.10 16:00	2007.10.10 23:00	2007	10	10	23:00	2007.10.10	2007.775228	2007.774829	0							0	None	input	near met. site at Carreg Wen	no	no		no	35	Wednesday	32	5
749	CR749	CR	2007.10.11 06:00	2007.10.11 04:30	2007.10.10 23:00	2007.10.11 06:00	2007	10	11	06:00	2007.10.11	2007.776027	2007.775856	0.07142857	-1.146128						0.5	None	input	near met. site at Carreg Wen	no	no		no	42	Wednesday	32	6
750	CR750	CR	2007.10.11 13:00	2007.10.11 09:30	2007.10.11 06:00	2007.10.11 13:00	2007	10	11	13:00	2007.10.11	2007.776827	2007.776427	0							0	None	input	near met. site at Carreg Wen	no	no		no	49	Thursday	32	7
751	CR751	CR	2007.10.11 20:00	2007.10.11 16:30	2007.10.11 13:00	2007.10.11 20:00	2007	10	11	20:00	2007.10.11	2007.777626	2007.777226	0							0	None	input	near met. site at Carreg Wen	no	no		no	56	Thursday	32	8
752	CR752	CR	2007.10.12 03:00	2007.10.11 23:30	2007.10.11 20:00	2007.10.12 03:00	2007	10	12	03:00	2007.10.12	2007.778425	2007.778025	0							0	None	input	near met. site at Carreg Wen	no	no		no	63	Thursday	32	9
753	CR753	CR	2007.10.12 10:00	2007.10.12 06:30	2007.10.12 03:00	2007.10.12 10:00	2007	10	12	10:00	2007.10.12	2007.779224	2007.778824	0							0	None	input	near met. site at Carreg Wen	no	no		no	70	Friday	32	10
754	CR754	CR	2007.10.12 17:00	2007.10.12 11:30	2007.10.12 10:00	2007.10.12 17:00	2007	10	12	17:00	2007.10.12	2007.780023	2007.779395	0.07142857	-1.146128						0.5	None	input	near met. site at Carreg Wen	no	no		no	77	Friday	32	11
755	CR755	CR	2007.10.13 00:00	2007.10.12 20:30	2007.10.12 17:00	2007.10.13 00:00	2007	10	13	00:00	2007.10.13	2007.780822	2007.780422	0							0	None	input	near met. site at Carreg Wen	no	no		no	84	Friday	32	12
756	CR756	CR	2007.10.13 07:00	2007.10.13 02:30	2007.10.13 00:00	2007.10.13 07:00	2007	10	13	07:00	2007.10.13	2007.781621	2007.781107	0.21428571	-0.6690068	3.6	-4.468	-24.802			1.5	None	input	near met. site at Carreg Wen	yes	yes	no	no	7	Saturday	32	13	-4.468	-24.802	3.6
757	CR757	CR	2007.10.13 14:00	2007.10.13 10:30	2007.10.13 07:00	2007.10.13 14:00	2007	10	13	14:00	2007.10.13	2007.78242	2007.782021	0							0	None	input	near met. site at Carreg Wen	no	no		no	14	Saturday	32	14
758	CR758	CR	2007.10.13 21:00	2007.10.13 18:00	2007.10.13 14:00	2007.10.13 21:00	2007	10	13	21:00	2007.10.13	2007.783219	2007.782877	0.28571429	-0.544068	1.21	-4.475	-23.796			2	None	input	near met. site at Carreg Wen	yes	yes	no	no	7	Saturday	32	15	-4.475	-23.796	1.21
759	CR759	CR	2007.10.14 04:00	2007.10.14 00:30	2007.10.13 21:00	2007.10.14 04:00	2007	10	14	04:00	2007.10.14	2007.784018	2007.783619	0							0	None	input	near met. site at Carreg Wen	no	no		no	14	Saturday	32	16
760	CR760	CR	2007.10.14 11:00	2007.10.14 07:30	2007.10.14 04:00	2007.10.14 11:00	2007	10	14	11:00	2007.10.14	2007.784817	2007.784418	0.07142857	-1.146128						0.5	None	input	near met. site at Carreg Wen	yes	no		no	7	Sunday	32	17
761	CR761	CR	2007.10.14 18:00	2007.10.14 11:30	2007.10.14 11:00	2007.10.14 18:00	2007	10	14	18:00	2007.10.14	2007.785616	2007.784874	0.07142857	-1.146128						0.5	None	input	near met. site at Carreg Wen	no	no		no	14	Sunday	32	18
762	CR762	CR	2007.10.15 01:00	2007.10.14 22:30	2007.10.14 18:00	2007.10.15 01:00	2007	10	15	01:00	2007.10.15	2007.786416	2007.78613	0.14285714	-0.845098						1	None	input	near met. site at Carreg Wen	yes	no		no	7	Sunday	32	19
763	CR763	CR	2007.10.15 08:00	2007.10.15 04:30	2007.10.15 01:00	2007.10.15 08:00	2007	10	15	08:00	2007.10.15	2007.787215	2007.786815	0							0	None	input	near met. site at Carreg Wen	no	no		no	14	Monday	32	20
764	CR764	CR	2007.10.15 15:00	2007.10.15 11:30	2007.10.15 08:00	2007.10.15 15:00	2007	10	15	15:00	2007.10.15	2007.788014	2007.787614	0							0	None	input	near met. site at Carreg Wen	no	no		no	21	Monday	32	21
765	CR765	CR	2007.10.15 22:00	2007.10.15 17:10	2007.10.15 15:00	2007.10.15 22:00	2007	10	15	22:00	2007.10.15	2007.788813	2007.788262	2.42857143	0.38535088	0.44	-3.059	-11.103			17	None	input	near met. site at Carreg Wen	yes	yes	no	no	7	Monday	32	22	-3.059	-11.103	0.44
766	CR766	CR	2007.10.16 05:00	2007.10.16 01:30	2007.10.15 22:00	2007.10.16 05:00	2007	10	16	05:00	2007.10.16	2007.789612	2007.789212	0							0	None	input	near met. site at Carreg Wen	no	no		no	14	Monday	32	23
767	CR767	CR	2007.10.16 12:00	2007.10.16 09:54	2007.10.16 05:00	2007.10.16 12:00	2007	10	16	12:00	2007.10.16	2007.790411	2007.790171	0.35714286	-0.447158	6.08	-3.424	-9.679			2.5	None	input	near met. site at Carreg Wen	yes	yes	no	no	7	Tuesday	32	24	-3.424	-9.679	6.08
768	CR768	CR	2007.10.16 19:00	2007.10.16 14:55	2007.10.16 12:00	2007.10.16 19:00	2007	10	16	19:00	2007.10.16	2007.79121	2007.790744	0.85714286	-0.0669468	6.89	-5.288	-25.139			6	None	input	near met. site at Carreg Wen	yes	yes	no	no	7	Tuesday	33	1	-5.288	-25.139	6.89
769	CR769	CR	2007.10.17 02:00	2007.10.17 01:30	2007.10.16 19:00	2007.10.17 02:00	2007	10	17	02:00	2007.10.17	2007.792009	2007.791952	0.07142857	-1.146128		-15.303	-109.447			0.5	None	input	near met. site at Carreg Wen	yes	yes	no	no	7	Tuesday	33	2	-15.303	-109.447
770	CR770	CR	2007.10.17 09:00	2007.10.17 05:30	2007.10.17 02:00	2007.10.17 09:00	2007	10	17	09:00	2007.10.17	2007.792808	2007.792409	0							0	None	input	near met. site at Carreg Wen	yes	no		no	7	Wednesday	33	3
771	CR771	CR	2007.10.17 16:00	2007.10.17 12:30	2007.10.17 09:00	2007.10.17 16:00	2007	10	17	16:00	2007.10.17	2007.793607	2007.793208	0							0	None	input	near met. site at Carreg Wen	no	no		no	14	Wednesday	33	4
772	CR772	CR	2007.10.17 23:00	2007.10.17 19:30	2007.10.17 16:00	2007.10.17 23:00	2007	10	17	23:00	2007.10.17	2007.794406	2007.794007	0							0	None	input	near met. site at Carreg Wen	no	no		no	21	Wednesday	33	5
773	CR773	CR	2007.10.18 06:00	2007.10.18 02:30	2007.10.17 23:00	2007.10.18 06:00	2007	10	18	06:00	2007.10.18	2007.795206	2007.794806	0							0	None	input	near met. site at Carreg Wen	no	no		no	28	Wednesday	33	6
774	CR774	CR	2007.10.18 13:00	2007.10.18 09:30	2007.10.18 06:00	2007.10.18 13:00	2007	10	18	13:00	2007.10.18	2007.796005	2007.795605	0							0	None	input	near met. site at Carreg Wen	no	no		no	35	Thursday	33	7
775	CR775	CR	2007.10.18 20:00	2007.10.18 16:30	2007.10.18 13:00	2007.10.18 20:00	2007	10	18	20:00	2007.10.18	2007.796804	2007.796404	0							0	None	input	near met. site at Carreg Wen	no	no		no	42	Thursday	33	8
776	CR776	CR	2007.10.19 03:00	2007.10.18 23:30	2007.10.18 20:00	2007.10.19 03:00	2007	10	19	03:00	2007.10.19	2007.797603	2007.797203	0							0	None	input	near met. site at Carreg Wen	no	no		no	49	Thursday	33	9
777	CR777	CR	2007.10.19 10:00	2007.10.19 06:30	2007.10.19 03:00	2007.10.19 10:00	2007	10	19	10:00	2007.10.19	2007.798402	2007.798002	0							0	None	input	near met. site at Carreg Wen	no	no		no	56	Friday	33	10
778	CR778	CR	2007.10.19 17:00	2007.10.19 13:30	2007.10.19 10:00	2007.10.19 17:00	2007	10	19	17:00	2007.10.19	2007.799201	2007.798801	0.07142857	-1.146128						0.5	None	input	near met. site at Carreg Wen	no	no		no	63	Friday	33	11
779	CR779	CR	2007.10.20 00:00	2007.10.19 20:30	2007.10.19 17:00	2007.10.20 00:00	2007	10	20	00:00	2007.10.20	2007.8	2007.799601	0							0	None	input	near met. site at Carreg Wen	no	no		no	70	Friday	33	12
780	CR780	CR	2007.10.20 07:00	2007.10.20 03:30	2007.10.20 00:00	2007.10.20 07:00	2007	10	20	07:00	2007.10.20	2007.800799	2007.8004	0							0	None	input	near met. site at Carreg Wen	no	no		no	77	Saturday	33	13
781	CR781	CR	2007.10.20 14:00	2007.10.20 10:30	2007.10.20 07:00	2007.10.20 14:00	2007	10	20	14:00	2007.10.20	2007.801598	2007.801199	0							0	None	input	near met. site at Carreg Wen	no	no		no	84	Saturday	33	14
782	CR782	CR	2007.10.20 21:00	2007.10.20 17:30	2007.10.20 14:00	2007.10.20 21:00	2007	10	20	21:00	2007.10.20	2007.802397	2007.801998	0							0	None	input	near met. site at Carreg Wen	no	no		no	91	Saturday	33	15
783	CR783	CR	2007.10.21 04:00	2007.10.21 00:30	2007.10.20 21:00	2007.10.21 04:00	2007	10	21	04:00	2007.10.21	2007.803196	2007.802797	0							0	None	input	near met. site at Carreg Wen	no	no		no	98	Saturday	33	16
784	CR784	CR	2007.10.21 11:00	2007.10.21 07:30	2007.10.21 04:00	2007.10.21 11:00	2007	10	21	11:00	2007.10.21	2007.803995	2007.803596	0							0	None	input	near met. site at Carreg Wen	no	no		no	105	Sunday	33	17
785	CR785	CR	2007.10.21 18:00	2007.10.21 14:30	2007.10.21 11:00	2007.10.21 18:00	2007	10	21	18:00	2007.10.21	2007.804795	2007.804395	0							0	None	input	near met. site at Carreg Wen	no	no		no	112	Sunday	33	18
786	CR786	CR	2007.10.22 01:00	2007.10.21 21:30	2007.10.21 18:00	2007.10.22 01:00	2007	10	22	01:00	2007.10.22	2007.805594	2007.805194	0							0	None	input	near met. site at Carreg Wen	no	no		no	119	Sunday	33	19
787	CR787	CR	2007.10.22 08:00	2007.10.22 04:30	2007.10.22 01:00	2007.10.22 08:00	2007	10	22	08:00	2007.10.22	2007.806393	2007.805993	0							0	None	input	near met. site at Carreg Wen	no	no		no	126	Monday	33	20
788	CR788	CR	2007.10.22 15:00	2007.10.22 11:30	2007.10.22 08:00	2007.10.22 15:00	2007	10	22	15:00	2007.10.22	2007.807192	2007.806792	0							0	None	input	near met. site at Carreg Wen	no	no		no	133	Monday	33	21
789	CR789	CR	2007.10.22 22:00	2007.10.22 18:30	2007.10.22 15:00	2007.10.22 22:00	2007	10	22	22:00	2007.10.22	2007.807991	2007.807591	0							0	None	input	near met. site at Carreg Wen	no	no		no	140	Monday	33	22
790	CR790	CR	2007.10.23 05:00	2007.10.23 01:30	2007.10.22 22:00	2007.10.23 05:00	2007	10	23	05:00	2007.10.23	2007.80879	2007.80839	0							0	None	input	near met. site at Carreg Wen	no	no		no	147	Monday	33	23
791	CR791	CR	2007.10.23 12:00	2007.10.23 08:30	2007.10.23 05:00	2007.10.23 12:00	2007	10	23	12:00	2007.10.23	2007.809589	2007.80919	0							0	None	input	near met. site at Carreg Wen	no	no		no	154	Tuesday	33	24
792	CR792	CR	2007.10.23 19:00	2007.10.23 15:30	2007.10.23 12:00	2007.10.23 19:00	2007	10	23	19:00	2007.10.23	2007.810388	2007.809989	0							0	end of corrected sample shift	input	near met. site at Carreg Wen	no	no		no	161	Tuesday	34	1
793	CR793	CR	2007.10.24 02:00	2007.10.23 22:30	2007.10.23 19:00	2007.10.24 02:00	2007	10	24	02:00	2007.10.24	2007.811187	2007.810788	0							0	None	input	near met. site at Carreg Wen	no	no		no	168	Tuesday	34	2
794	CR794	CR	2007.10.24 09:00	2007.10.24 05:30	2007.10.24 02:00	2007.10.24 09:00	2007	10	24	09:00	2007.10.24	2007.811986	2007.811587	0							0	None	input	near met. site at Carreg Wen	no	no		no	175	Wednesday	34	3
795	CR795	CR	2007.10.24 16:00	2007.10.24 12:30	2007.10.24 09:00	2007.10.24 16:00	2007	10	24	16:00	2007.10.24	2007.812785	2007.812386	0							0	None	input	near met. site at Carreg Wen	no	no		no	182	Wednesday	34	4
796	CR796	CR	2007.10.24 23:00	2007.10.24 19:30	2007.10.24 16:00	2007.10.24 23:00	2007	10	24	23:00	2007.10.24	2007.813585	2007.813185	0							0	None	input	near met. site at Carreg Wen	no	no		no	189	Wednesday	34	5
797	CR797	CR	2007.10.25 06:00	2007.10.25 02:30	2007.10.24 23:00	2007.10.25 06:00	2007	10	25	06:00	2007.10.25	2007.814384	2007.813984	0							0	None	input	near met. site at Carreg Wen	no	no		no	196	Wednesday	34	6
798	CR798	CR	2007.10.25 13:00	2007.10.25 09:30	2007.10.25 06:00	2007.10.25 13:00	2007	10	25	13:00	2007.10.25	2007.815183	2007.814783	0							0	None	input	near met. site at Carreg Wen	no	no		no	203	Thursday	34	7
799	CR799	CR	2007.10.25 20:00	2007.10.25 16:30	2007.10.25 13:00	2007.10.25 20:00	2007	10	25	20:00	2007.10.25	2007.815982	2007.815582	0							0	None	input	near met. site at Carreg Wen	no	no		no	210	Thursday	34	8
800	CR800	CR	2007.10.26 03:00	2007.10.25 23:30	2007.10.25 20:00	2007.10.26 03:00	2007	10	26	03:00	2007.10.26	2007.816781	2007.816381	0							0	None	input	near met. site at Carreg Wen	no	no		no	217	Thursday	34	9
801	CR801	CR	2007.10.26 10:00	2007.10.26 06:30	2007.10.26 03:00	2007.10.26 10:00	2007	10	26	10:00	2007.10.26	2007.81758	2007.81718	0							0	None	input	near met. site at Carreg Wen	no	no		no	224	Friday	34	10
802	CR802	CR	2007.10.26 17:00	2007.10.26 13:30	2007.10.26 10:00	2007.10.26 17:00	2007	10	26	17:00	2007.10.26	2007.818379	2007.81798	0							0	None	input	near met. site at Carreg Wen	no	no		no	231	Friday	34	11
803	CR803	CR	2007.10.27 00:00	2007.10.26 21:50	2007.10.26 17:00	2007.10.27 00:00	2007	10	27	00:00	2007.10.27	2007.819178	2007.818931	0.64285714	-0.1918855	9.93	-4.601	-20.255			4.5	None	input	near met. site at Carreg Wen	yes	yes	no	no	238	Friday	34	12	-4.601	-20.255	9.93
804	CR804	CR	2007.10.27 07:00	2007.10.27 01:51	2007.10.27 00:00	2007.10.27 07:00	2007	10	27	07:00	2007.10.27	2007.819977	2007.819391	0.78571429	-0.1047354	1.19	-3.82	-14.142			5.5	None	input	near met. site at Carreg Wen	yes	yes	no	no	7	Saturday	34	13	-3.82	-14.142	1.19
805	CR805	CR	2007.10.27 14:00	2007.10.27 09:00	2007.10.27 07:00	2007.10.27 14:00	2007	10	27	14:00	2007.10.27	2007.820776	2007.820206	0.14285714	-0.845098						1	None	input	near met. site at Carreg Wen	yes	no		no	7	Saturday	34	14
806	CR806	CR	2007.10.27 21:00	2007.10.27 17:24	2007.10.27 14:00	2007.10.27 21:00	2007	10	27	21:00	2007.10.27	2007.821575	2007.821165	0.78571429	-0.1047354	0.81	-2.726	-13.988			5.5	None	input	near met. site at Carreg Wen	yes	yes	no	no	7	Saturday	34	15	-2.726	-13.988	0.81
807	CR807	CR	2007.10.28 04:00	2007.10.28 01:16	2007.10.27 21:00	2007.10.28 04:00	2007	10	28	04:00	2007.10.28	2007.822374	2007.822063	0.92857143	-0.0321847	2.18	-3.215	-14.995			6.5	None	input	near met. site at Carreg Wen	yes	yes	no	no	7	Saturday	34	16	-3.215	-14.995	2.18
808	CR808	CR	2007.10.28 11:00	2007.10.28 06:20	2007.10.28 04:00	2007.10.28 11:00	2007	10	28	11:00	2007.10.28	2007.823174	2007.822641	4.71428571	0.6734159	0.6	-5.976	-37.988			33	None	input	near met. site at Carreg Wen	yes	yes	no	no	7	Sunday	34	17	-5.976	-37.988	0.6
809	CR809	CR	2007.10.28 18:00	2007.10.28 17:23	2007.10.28 11:00	2007.10.28 18:00	2007	10	28	18:00	2007.10.28	2007.823973	2007.823903	0.64285714	-0.1918855						4.5	None	input	near met. site at Carreg Wen	yes	no		no	7	Sunday	34	18
810	CR810	CR	2007.10.29 01:00	2007.10.28 20:00	2007.10.28 18:00	2007.10.29 01:00	2007	10	29	01:00	2007.10.29	2007.824772	2007.824201	0.28571429	-0.544068	4.66	-7.117	-35.166			2	None	input	near met. site at Carreg Wen	yes	yes	no	no	7	Sunday	34	19	-7.117	-35.166	4.66
811	CR811	CR	2007.10.29 08:00	2007.10.29 04:30	2007.10.29 01:00	2007.10.29 08:00	2007	10	29	08:00	2007.10.29	2007.825571	2007.825171	0							0	None	input	near met. site at Carreg Wen	yes	no		no	7	Monday	34	20
812	CR812	CR	2007.10.29 15:00	2007.10.29 09:30	2007.10.29 08:00	2007.10.29 15:00	2007	10	29	15:00	2007.10.29	2007.82637	2007.825742	0.07142857	-1.146128						0.5	None	input	near met. site at Carreg Wen	yes	no		no	7	Monday	34	21
813	CR813	CR	2007.10.29 22:00	2007.10.29 18:30	2007.10.29 15:00	2007.10.29 22:00	2007	10	29	22:00	2007.10.29	2007.827169	2007.826769	0							0	None	input	near met. site at Carreg Wen	no	no		no	7	Monday	34	22
814	CR814	CR	2007.10.30 05:00	2007.10.30 01:12	2007.10.29 22:00	2007.10.30 05:00	2007	10	30	05:00	2007.10.30	2007.827968	2007.827536	0.5	-0.30103	7.16	-5.718	-23.57			3.5	None	input	near met. site at Carreg Wen	yes	yes	no	no	14	Monday	34	23	-5.718	-23.57	7.16
815	CR815	CR	2007.10.30 12:00	2007.10.30 08:30	2007.10.30 05:00	2007.10.30 12:00	2007	10	30	12:00	2007.10.30	2007.828767	2007.828368	0							0	None	input	near met. site at Carreg Wen	no	no		no	7	Tuesday	34	24
816	CR816	CR	2007.10.30 19:00	2007.10.30 15:30	2007.10.30 12:00	2007.10.30 19:00	2007	10	30	19:00	2007.10.30	2007.829566	2007.829167	0							0	Changed 11:15 not raining	input	near met. site at Carreg Wen	no	no		no	14	Tuesday	35	1
817	CR817	CR	2007.10.31 02:00	2007.10.31 00:30	2007.10.30 19:00	2007.10.31 02:00	2007	10	31	02:00	2007.10.31	2007.830365	2007.830194	0.07142857	-1.146128						0.5	None	input	near met. site at Carreg Wen	no	no		no	21	Tuesday	35	2
818	CR818	CR	2007.10.31 09:00	2007.10.31 05:30	2007.10.31 02:00	2007.10.31 09:00	2007	10	31	09:00	2007.10.31	2007.831164	2007.830765	0							0	None	input	near met. site at Carreg Wen	no	no		no	28	Wednesday	35	3
819	CR819	CR	2007.10.31 16:00	2007.10.31 12:30	2007.10.31 09:00	2007.10.31 16:00	2007	10	31	16:00	2007.10.31	2007.831964	2007.831564	0							0	None	input	near met. site at Carreg Wen	no	no		no	35	Wednesday	35	4
820	CR820	CR	2007.10.31 23:00	2007.10.31 19:30	2007.10.31 16:00	2007.10.31 23:00	2007	10	31	23:00	2007.10.31	2007.832763	2007.832363	0							0	None	input	near met. site at Carreg Wen	no	no		no	42	Wednesday	35	5
821	CR821	CR	2007.11.01 06:00	2007.11.01 05:30	2007.10.31 23:00	2007.11.01 06:00	2007	11	1	06:00	2007.11.01	2007.833562	2007.833505	0.07142857	-1.146128						0.5	None	input	near met. site at Carreg Wen	no	no		no	49	Wednesday	35	6
822	CR822	CR	2007.11.01 13:00	2007.11.01 09:30	2007.11.01 06:00	2007.11.01 13:00	2007	11	1	13:00	2007.11.01	2007.834361	2007.833961	0							0	None	input	near met. site at Carreg Wen	no	no		no	56	Thursday	35	7
823	CR823	CR	2007.11.01 20:00	2007.11.01 16:30	2007.11.01 13:00	2007.11.01 20:00	2007	11	1	20:00	2007.11.01	2007.83516	2007.83476	0							0	None	input	near met. site at Carreg Wen	no	no		no	63	Thursday	35	8
824	CR824	CR	2007.11.02 03:00	2007.11.01 23:30	2007.11.01 20:00	2007.11.02 03:00	2007	11	2	03:00	2007.11.02	2007.835959	2007.835559	0							0	None	input	near met. site at Carreg Wen	no	no		no	70	Thursday	35	9
825	CR825	CR	2007.11.02 10:00	2007.11.02 06:30	2007.11.02 03:00	2007.11.02 10:00	2007	11	2	10:00	2007.11.02	2007.836758	2007.836358	0							0	None	input	near met. site at Carreg Wen	no	no		no	77	Friday	35	10
826	CR826	CR	2007.11.02 17:00	2007.11.02 13:30	2007.11.02 10:00	2007.11.02 17:00	2007	11	2	17:00	2007.11.02	2007.837557	2007.837158	0							0	None	input	near met. site at Carreg Wen	no	no		no	84	Friday	35	11
827	CR827	CR	2007.11.03 00:00	2007.11.02 20:30	2007.11.02 17:00	2007.11.03 00:00	2007	11	3	00:00	2007.11.03	2007.838356	2007.837957	0							0	None	input	near met. site at Carreg Wen	no	no		no	91	Friday	35	12
828	CR828	CR	2007.11.03 07:00	2007.11.03 03:30	2007.11.03 00:00	2007.11.03 07:00	2007	11	3	07:00	2007.11.03	2007.839155	2007.838756	0							0	None	input	near met. site at Carreg Wen	no	no		no	98	Saturday	35	13
829	CR829	CR	2007.11.03 14:00	2007.11.03 10:30	2007.11.03 07:00	2007.11.03 14:00	2007	11	3	14:00	2007.11.03	2007.839954	2007.839555	0							0	None	input	near met. site at Carreg Wen	no	no		no	105	Saturday	35	14
830	CR830	CR	2007.11.03 21:00	2007.11.03 18:30	2007.11.03 14:00	2007.11.03 21:00	2007	11	3	21:00	2007.11.03	2007.840753	2007.840468	0.07142857	-1.146128						0.5	None	input	near met. site at Carreg Wen	yes	no		no	112	Saturday	35	15
831	CR831	CR	2007.11.04 04:00	2007.11.04 00:30	2007.11.03 21:00	2007.11.04 04:00	2007	11	4	04:00	2007.11.04	2007.841553	2007.841153	0							0	None	input	near met. site at Carreg Wen	no	no		no	7	Saturday	35	16
832	CR832	CR	2007.11.04 11:00	2007.11.04 07:30	2007.11.04 04:00	2007.11.04 11:00	2007	11	4	11:00	2007.11.04	2007.842352	2007.841952	0							0	None	input	near met. site at Carreg Wen	no	no		no	14	Sunday	35	17
833	CR833	CR	2007.11.04 18:00	2007.11.04 14:30	2007.11.04 11:00	2007.11.04 18:00	2007	11	4	18:00	2007.11.04	2007.843151	2007.842751	0							0	None	input	near met. site at Carreg Wen	no	no		no	21	Sunday	35	18
834	CR834	CR	2007.11.05 01:00	2007.11.04 21:30	2007.11.04 18:00	2007.11.05 01:00	2007	11	5	01:00	2007.11.05	2007.84395	2007.84355	0							0	None	input	near met. site at Carreg Wen	no	no		no	28	Sunday	35	19
835	CR835	CR	2007.11.05 08:00	2007.11.05 06:50	2007.11.05 01:00	2007.11.05 08:00	2007	11	5	08:00	2007.11.05	2007.844749	2007.844616	0.21428571	-0.6690068						1.5	None	input	near met. site at Carreg Wen	no	no		no	35	Monday	35	20
836	CR836	CR	2007.11.05 15:00	2007.11.05 12:56	2007.11.05 08:00	2007.11.05 15:00	2007	11	5	15:00	2007.11.05	2007.845548	2007.845313	0.64285714	-0.1918855	2.72	-4.09	-19.0922227			4.5	None	input	near met. site at Carreg Wen	yes	yes	yes	no	42	Monday	35	21	-4.09	-19.776	2.72
837	CR837	CR	2007.11.05 22:00	2007.11.05 18:30	2007.11.05 15:00	2007.11.05 22:00	2007	11	5	22:00	2007.11.05	2007.846347	2007.845948	0							0	None	input	near met. site at Carreg Wen	yes	no		no	7	Monday	35	22
838	CR838	CR	2007.11.06 05:00	2007.11.06 01:30	2007.11.05 22:00	2007.11.06 05:00	2007	11	6	05:00	2007.11.06	2007.847146	2007.846747	0							0	None	input	near met. site at Carreg Wen	no	no		no	7	Monday	35	23
839	CR839	CR	2007.11.06 12:00	2007.11.06 08:30	2007.11.06 05:00	2007.11.06 12:00	2007	11	6	12:00	2007.11.06	2007.847945	2007.847546	0							0	None	input	near met. site at Carreg Wen	no	no		no	14	Tuesday	35	24
840	CR840	CR	2007.11.06 19:00	2007.11.06 15:30	2007.11.06 12:00	2007.11.06 19:00	2007	11	6	19:00	2007.11.06	2007.848744	2007.848345	0							0	Changed 11:46 not raining	input	near met. site at Carreg Wen	no	no		no	21	Tuesday	36	1
841	CR841	CR	2007.11.07 02:00	2007.11.06 22:30	2007.11.06 19:00	2007.11.07 02:00	2007	11	7	02:00	2007.11.07	2007.849543	2007.849144	0							0	None	input	near met. site at Carreg Wen	no	no		no	28	Tuesday	36	2
842	CR842	CR	2007.11.07 09:00	2007.11.07 05:30	2007.11.07 02:00	2007.11.07 09:00	2007	11	7	09:00	2007.11.07	2007.850343	2007.849943	0.07142857	-1.146128						0.5	None	input	near met. site at Carreg Wen	no	no		no	35	Wednesday	36	3
843	CR843	CR	2007.11.07 16:00	2007.11.07 12:30	2007.11.07 09:00	2007.11.07 16:00	2007	11	7	16:00	2007.11.07	2007.851142	2007.850742	0							0	None	input	near met. site at Carreg Wen	no	no		no	42	Wednesday	36	4
844	CR844	CR	2007.11.07 23:00	2007.11.07 18:30	2007.11.07 16:00	2007.11.07 23:00	2007	11	7	23:00	2007.11.07	2007.851941	2007.851427	0.07142857	-1.146128						0.5	None	input	near met. site at Carreg Wen	no	no		no	49	Wednesday	36	5
845	CR845	CR	2007.11.08 06:00	2007.11.08 05:30	2007.11.07 23:00	2007.11.08 06:00	2007	11	8	06:00	2007.11.08	2007.85274	2007.852683	0.14285714	-0.845098						1	None	input	near met. site at Carreg Wen	no	no		no	56	Wednesday	36	6
846	CR846	CR	2007.11.08 13:00	2007.11.08 10:51	2007.11.08 06:00	2007.11.08 13:00	2007	11	8	13:00	2007.11.08	2007.853539	2007.853295	1.78571429	0.25181197	8.41	-4.514	-22.2972227			12.5	None	input	near met. site at Carreg Wen	yes	yes	yes	no	63	Thursday	36	7	-4.514	-22.981	8.41
847	CR847	CR	2007.11.08 20:00	2007.11.08 16:30	2007.11.08 13:00	2007.11.08 20:00	2007	11	8	20:00	2007.11.08	2007.854338	2007.853938	0		17.4	-5.05	-25.1622227			0	None	input	near met. site at Carreg Wen	yes	yes	yes	no	7	Thursday	36	8	-5.05	-25.846	17.4
848	CR848	CR	2007.11.09 03:00	2007.11.08 23:30	2007.11.08 20:00	2007.11.09 03:00	2007	11	9	03:00	2007.11.09	2007.855137	2007.854737	0.07142857	-1.146128						0.5	None	input	near met. site at Carreg Wen	yes	no		no	7	Thursday	36	9
849	CR849	CR	2007.11.09 10:00	2007.11.09 03:30	2007.11.09 03:00	2007.11.09 10:00	2007	11	9	10:00	2007.11.09	2007.855936	2007.855194	0.14285714	-0.845098	31.4	-3.611	-3.750222697			1	None	input	near met. site at Carreg Wen	yes	yes	yes	yes	7	Friday	36	10	-3.611	-4.434	31.4
850	CR850	CR	2007.11.09 17:00	2007.11.09 13:30	2007.11.09 10:00	2007.11.09 17:00	2007	11	9	17:00	2007.11.09	2007.856735	2007.856336	0		15.3	-3.238	-8.073222697			0	None	input	near met. site at Carreg Wen	yes	yes	yes	no	7	Friday	36	11	-3.238	-8.757	15.3
851	CR851	CR	2007.11.10 00:00	2007.11.09 22:30	2007.11.09 17:00	2007.11.10 00:00	2007	11	10	00:00	2007.11.10	2007.857534	2007.857363	0.28571429	-0.544068						2	None	input	near met. site at Carreg Wen	yes	no		no	7	Friday	36	12
852	CR852	CR	2007.11.10 07:00	2007.11.10 03:06	2007.11.10 00:00	2007.11.10 07:00	2007	11	10	07:00	2007.11.10	2007.858333	2007.857888	0.35714286	-0.447158	36.3					2.5	None	input	near met. site at Carreg Wen	yes	no		yes	7	Saturday	36	13			36.3
853	CR853	CR	2007.11.10 14:00	2007.11.10 07:50	2007.11.10 07:00	2007.11.10 14:00	2007	11	10	14:00	2007.11.10	2007.859132	2007.858429	0.21428571	-0.6690068	20.1	-3.136	-8.469222697			1.5	None	input	near met. site at Carreg Wen	yes	yes	yes	no	7	Saturday	36	14	-3.136	-9.153	20.1
854	CR854	CR	2007.11.10 21:00	2007.11.10 14:54	2007.11.10 14:00	2007.11.10 21:00	2007	11	10	21:00	2007.11.10	2007.859932	2007.859235	0.35714286	-0.447158	13.6	-3.164	-8.282222697			2.5	None	input	near met. site at Carreg Wen	yes	yes	yes	no	7	Saturday	36	15	-3.164	-8.966	13.6
855	CR855	CR	2007.11.11 04:00	2007.11.11 01:06	2007.11.10 21:00	2007.11.11 04:00	2007	11	11	04:00	2007.11.11	2007.860731	2007.8604	0.71428571	-0.146128	13.7	-3.326	-10.0032227			5	None	input	near met. site at Carreg Wen	yes	yes	yes	no	7	Saturday	36	16	-3.326	-10.687	13.7
856	CR856	CR	2007.11.11 11:00	2007.11.11 05:46	2007.11.11 04:00	2007.11.11 11:00	2007	11	11	11:00	2007.11.11	2007.86153	2007.860933	0.78571429	-0.1047354	9.38	-3.32	-10.5212227			5.5	None	input	near met. site at Carreg Wen	yes	yes	yes	no	7	Sunday	36	17	-3.32	-11.205	9.38
857	CR857	CR	2007.11.11 18:00	2007.11.11 17:30	2007.11.11 11:00	2007.11.11 18:00	2007	11	11	18:00	2007.11.11	2007.862329	2007.862272	0.07142857	-1.146128						0.5	None	input	near met. site at Carreg Wen	yes	no		no	7	Sunday	36	18
858	CR858	CR	2007.11.12 01:00	2007.11.11 21:30	2007.11.11 18:00	2007.11.12 01:00	2007	11	12	01:00	2007.11.12	2007.863128	2007.862728	0							0	None	input	near met. site at Carreg Wen	no	no		no	7	Sunday	36	19
859	CR859	CR	2007.11.12 08:00	2007.11.12 04:30	2007.11.12 01:00	2007.11.12 08:00	2007	11	12	08:00	2007.11.12	2007.863927	2007.863527	0							0	None	input	near met. site at Carreg Wen	no	no		no	14	Monday	36	20
860	CR860	CR	2007.11.12 15:00	2007.11.12 11:30	2007.11.12 08:00	2007.11.12 15:00	2007	11	12	15:00	2007.11.12	2007.864726	2007.864327	0							0	None	input	near met. site at Carreg Wen	no	no		no	21	Monday	36	21
861	CR861	CR	2007.11.12 22:00	2007.11.12 18:30	2007.11.12 15:00	2007.11.12 22:00	2007	11	12	22:00	2007.11.12	2007.865525	2007.865126	0							0	None	input	near met. site at Carreg Wen	no	no		no	28	Monday	36	22
862	CR862	CR	2007.11.13 05:00	2007.11.13 00:30	2007.11.12 22:00	2007.11.13 05:00	2007	11	13	05:00	2007.11.13	2007.866324	2007.865811	0.85714286	-0.0669468	2.21	-4.221	-11.4262227			6	None	input	near met. site at Carreg Wen	yes	yes	yes	no	35	Monday	36	23	-4.221	-12.11	2.21
863	CR863	CR	2007.11.13 12:00	2007.11.13 08:00	2007.11.13 05:00	2007.11.13 12:00	2007	11	13	12:00	2007.11.13	2007.867123	2007.866667	0.14285714	-0.845098						1	None	input	near met. site at Carreg Wen	yes	no		no	7	Tuesday	36	24
864	CR864	CR	2007.11.13 19:00	2007.11.13 14:50	2007.11.13 12:00	2007.11.13 19:00	2007	11	13	19:00	2007.11.13	2007.867922	2007.867447	0.21428571	-0.6690068	23.4	-1.663	6.320777303			1.5	None	input	near met. site at Carreg Wen	yes	yes	yes	no	7	Tuesday	37	1	-1.663	5.637	23.4
865	CR865	CR	2007.11.14 02:00	2007.11.13 19:30	2007.11.13 19:00	2007.11.14 02:00	2007	11	14	02:00	2007.11.14	2007.868722	2007.86798	0.14285714	-0.845098		-4.166	-13.3822227			1	None	input	near met. site at Carreg Wen	yes	yes	yes	no	7	Tuesday	37	2	-4.166	-14.066
866	CR866	CR	2007.11.14 09:00	2007.11.14 05:30	2007.11.14 02:00	2007.11.14 09:00	2007	11	14	09:00	2007.11.14	2007.869521	2007.869121	0.07142857	-1.146128						0.5	None	input	near met. site at Carreg Wen	no	no		no	7	Wednesday	37	3
867	CR867	CR	2007.11.14 16:00	2007.11.14 11:30	2007.11.14 09:00	2007.11.14 16:00	2007	11	14	16:00	2007.11.14	2007.87032	2007.869806	0.07142857	-1.146128	2.58					0.5	None	input	near met. site at Carreg Wen	yes	no		no	14	Wednesday	37	4			2.58
868	CR868	CR	2007.11.14 23:00	2007.11.14 19:30	2007.11.14 16:00	2007.11.14 23:00	2007	11	14	23:00	2007.11.14	2007.871119	2007.870719	0							0	None	input	near met. site at Carreg Wen	no	no		no	7	Wednesday	37	5
869	CR869	CR	2007.11.15 06:00	2007.11.15 02:30	2007.11.14 23:00	2007.11.15 06:00	2007	11	15	06:00	2007.11.15	2007.871918	2007.871518	0							0	None	input	near met. site at Carreg Wen	no	no		no	14	Wednesday	37	6
870	CR870	CR	2007.11.15 13:00	2007.11.15 08:30	2007.11.15 06:00	2007.11.15 13:00	2007	11	15	13:00	2007.11.15	2007.872717	2007.872203	0.07142857	-1.146128						0.5	None	input	near met. site at Carreg Wen	no	no		no	21	Thursday	37	7
871	CR871	CR	2007.11.15 20:00	2007.11.15 16:30	2007.11.15 13:00	2007.11.15 20:00	2007	11	15	20:00	2007.11.15	2007.873516	2007.873116	0							0	None	input	near met. site at Carreg Wen	no	no		no	28	Thursday	37	8
872	CR872	CR	2007.11.16 03:00	2007.11.15 23:30	2007.11.15 20:00	2007.11.16 03:00	2007	11	16	03:00	2007.11.16	2007.874315	2007.873916	0							0	None	input	near met. site at Carreg Wen	no	no		no	35	Thursday	37	9
873	CR873	CR	2007.11.16 10:00	2007.11.16 06:30	2007.11.16 03:00	2007.11.16 10:00	2007	11	16	10:00	2007.11.16	2007.875114	2007.874715	0							0	None	input	near met. site at Carreg Wen	no	no		no	42	Friday	37	10
874	CR874	CR	2007.11.16 17:00	2007.11.16 15:30	2007.11.16 10:00	2007.11.16 17:00	2007	11	16	17:00	2007.11.16	2007.875913	2007.875742	0.07142857	-1.146128		-4.312	-7.874222697			0.5	None	input	near met. site at Carreg Wen	no	yes	yes	no	49	Friday	37	11	-4.312	-8.558
875	CR875	CR	2007.11.17 00:00	2007.11.16 21:00	2007.11.16 17:00	2007.11.17 00:00	2007	11	17	00:00	2007.11.17	2007.876712	2007.87637	0.14285714	-0.845098	4.28	-4.7	-10.6792227			1	None	input	near met. site at Carreg Wen	yes	yes	yes	no	56	Friday	37	12	-4.7	-11.363	4.28
876	CR876	CR	2007.11.17 07:00	2007.11.17 03:30	2007.11.17 00:00	2007.11.17 07:00	2007	11	17	07:00	2007.11.17	2007.877511	2007.877112	0							0	None	input	near met. site at Carreg Wen	no	no		no	7	Saturday	37	13
877	CR877	CR	2007.11.17 14:00	2007.11.17 10:30	2007.11.17 07:00	2007.11.17 14:00	2007	11	17	14:00	2007.11.17	2007.878311	2007.877911	0							0	None	input	near met. site at Carreg Wen	no	no		no	14	Saturday	37	14
878	CR878	CR	2007.11.17 21:00	2007.11.17 18:20	2007.11.17 14:00	2007.11.17 21:00	2007	11	17	21:00	2007.11.17	2007.87911	2007.878805	0.42857143	-0.3679768	22.5	-9.934	-58.0512227			3	None	input	near met. site at Carreg Wen	yes	yes	yes	no	21	Saturday	37	15	-9.934	-58.735	22.5
879	CR879	CR	2007.11.18 04:00	2007.11.17 23:07	2007.11.17 21:00	2007.11.18 04:00	2007	11	18	04:00	2007.11.18	2007.879909	2007.879352	0.57142857	-0.243038	2.38	-18.779	-134.8562227			4	None	input	near met. site at Carreg Wen	yes	yes	yes	no	7	Saturday	37	16	-18.779	-135.54	2.38
880	CR880	CR	2007.11.18 11:00	2007.11.18 04:30	2007.11.18 04:00	2007.11.18 11:00	2007	11	18	11:00	2007.11.18	2007.880708	2007.879966	0.07142857	-1.146128						0.5	None	input	near met. site at Carreg Wen	yes	no		no	7	Sunday	37	17
881	CR881	CR	2007.11.18 18:00	2007.11.18 12:30	2007.11.18 11:00	2007.11.18 18:00	2007	11	18	18:00	2007.11.18	2007.881507	2007.880879	0.07142857	-1.146128						0.5	None	input	near met. site at Carreg Wen	yes	no		no	7	Sunday	37	18
882	CR882	CR	2007.11.19 01:00	2007.11.18 21:30	2007.11.18 18:00	2007.11.19 01:00	2007	11	19	01:00	2007.11.19	2007.882306	2007.881906	0							0	None	input	near met. site at Carreg Wen	no	no		no	7	Sunday	37	19
883	CR883	CR	2007.11.19 08:00	2007.11.19 04:30	2007.11.19 01:00	2007.11.19 08:00	2007	11	19	08:00	2007.11.19	2007.883105	2007.882706	0							0	None	input	near met. site at Carreg Wen	no	no		no	14	Monday	37	20
884	CR884	CR	2007.11.19 15:00	2007.11.19 14:15	2007.11.19 08:00	2007.11.19 15:00	2007	11	19	15:00	2007.11.19	2007.883904	2007.883819	0.28571429	-0.544068		-15.291	-108.4322227			2	None	input	near met. site at Carreg Wen	yes	yes	yes	no	21	Monday	37	21	-15.291	-109.116
885	CR885	CR	2007.11.19 22:00	2007.11.19 16:12	2007.11.19 15:00	2007.11.19 22:00	2007	11	19	22:00	2007.11.19	2007.884703	2007.884041	0.71428571	-0.146128	0.94	-14.987	-106.1652227			5	None	input	near met. site at Carreg Wen	yes	yes	yes	no	7	Monday	37	22	-14.987	-106.849	0.94
886	CR886	CR	2007.11.20 05:00	2007.11.20 00:30	2007.11.19 22:00	2007.11.20 05:00	2007	11	20	05:00	2007.11.20	2007.885502	2007.884989	0.07142857	-1.146128						0.5	None	input	near met. site at Carreg Wen	no	no		no	7	Monday	37	23
887	CR887	CR	2007.11.20 12:00	2007.11.20 08:30	2007.11.20 05:00	2007.11.20 12:00	2007	11	20	12:00	2007.11.20	2007.886301	2007.885902	0							0	Black greasy soot deposit in sampler 'clock face'	input	near met. site at Carreg Wen	no	no		no	14	Tuesday	37	24
888	CR888	CR	2007.11.20 19:00	2007.11.20 15:30	2007.11.20 12:00	2007.11.20 19:00	2007	11	20	19:00	2007.11.20	2007.887101	2007.886701	0							0	None	input	near met. site at Carreg Wen	no	no		no	21	Tuesday	38	1
889	CR889	CR	2007.11.21 02:00	2007.11.20 21:22	2007.11.20 19:00	2007.11.21 02:00	2007	11	21	02:00	2007.11.21	2007.8879	2007.887372	0.57142857	-0.243038	0.62	-13.484	-94.7902227			4	None	input	near met. site at Carreg Wen	yes	yes	yes	no	28	Tuesday	38	2	-13.484	-95.474	0.62
890	CR890	CR	2007.11.21 09:00	2007.11.21 05:30	2007.11.21 02:00	2007.11.21 09:00	2007	11	21	09:00	2007.11.21	2007.888699	2007.888299	0							0	None	input	near met. site at Carreg Wen	no	no		no	7	Wednesday	38	3
891	CR891	CR	2007.11.21 16:00	2007.11.21 11:20	2007.11.21 09:00	2007.11.21 16:00	2007	11	21	16:00	2007.11.21	2007.889498	2007.888965	0.42857143	-0.3679768	4.39	-12.659	-89.1412227			3	None	input	near met. site at Carreg Wen	yes	yes	yes	no	14	Wednesday	38	4	-12.659	-89.825	4.39
892	CR892	CR	2007.11.21 23:00	2007.11.21 18:00	2007.11.21 16:00	2007.11.21 23:00	2007	11	21	23:00	2007.11.21	2007.890297	2007.889726	0.14285714	-0.845098						1	None	input	near met. site at Carreg Wen	yes	no		no	7	Wednesday	38	5
893	CR893	CR	2007.11.22 06:00	2007.11.22 02:30	2007.11.21 23:00	2007.11.22 06:00	2007	11	22	06:00	2007.11.22	2007.891096	2007.890696	0							0	None	input	near met. site at Carreg Wen	no	no		no	7	Wednesday	38	6
894	CR894	CR	2007.11.22 13:00	2007.11.22 09:30	2007.11.22 06:00	2007.11.22 13:00	2007	11	22	13:00	2007.11.22	2007.891895	2007.891495	0.35714286	-0.447158	6.99	-7.509	-46.0752227			2.5	None	input	near met. site at Carreg Wen	yes	yes	yes	no	14	Thursday	38	7	-7.509	-46.759	6.99
895	CR895	CR	2007.11.22 20:00	2007.11.22 16:30	2007.11.22 13:00	2007.11.22 20:00	2007	11	22	20:00	2007.11.22	2007.892694	2007.892295	0							0	None	input	near met. site at Carreg Wen	no	no		no	7	Thursday	38	8
896	CR896	CR	2007.11.23 03:00	2007.11.22 23:30	2007.11.22 20:00	2007.11.23 03:00	2007	11	23	03:00	2007.11.23	2007.893493	2007.893094	0							0	None	input	near met. site at Carreg Wen	no	no		no	14	Thursday	38	9
897	CR897	CR	2007.11.23 10:00	2007.11.23 09:30	2007.11.23 03:00	2007.11.23 10:00	2007	11	23	10:00	2007.11.23	2007.894292	2007.894235	0.07142857	-1.146128						0.5	None	input	near met. site at Carreg Wen	no	no		no	21	Friday	38	10
898	CR898	CR	2007.11.23 17:00	2007.11.23 13:30	2007.11.23 10:00	2007.11.23 17:00	2007	11	23	17:00	2007.11.23	2007.895091	2007.894692	0							0	None	input	near met. site at Carreg Wen	no	no		no	28	Friday	38	11
899	CR899	CR	2007.11.24 00:00	2007.11.23 20:30	2007.11.23 17:00	2007.11.24 00:00	2007	11	24	00:00	2007.11.24	2007.89589	2007.895491	0							0	None	input	near met. site at Carreg Wen	no	no		no	35	Friday	38	12
900	CR900	CR	2007.11.24 07:00	2007.11.24 03:30	2007.11.24 00:00	2007.11.24 07:00	2007	11	24	07:00	2007.11.24	2007.89669	2007.89629	0		0.93	-4.552	-14.5992227			0	None	input	near met. site at Carreg Wen	yes	yes	yes	no	42	Saturday	38	13	-4.552	-15.283	0.93
901	CR901	CR	2007.11.24 14:00	2007.11.24 09:47	2007.11.24 07:00	2007.11.24 14:00	2007	11	24	14:00	2007.11.24	2007.897489	2007.897008	2.21428571	0.34523366	10.9	-4.688	-11.7042227			15.5	None	input	near met. site at Carreg Wen	yes	yes	yes	no	7	Saturday	38	14	-4.688	-12.388	10.9
902	CR902	CR	2007.11.24 21:00	2007.11.24 17:30	2007.11.24 14:00	2007.11.24 21:00	2007	11	24	21:00	2007.11.24	2007.898288	2007.897888	0.14285714	-0.845098						1	None	input	near met. site at Carreg Wen	yes	no		no	7	Saturday	38	15
903	CR903	CR	2007.11.25 04:00	2007.11.25 03:30	2007.11.24 21:00	2007.11.25 04:00	2007	11	25	04:00	2007.11.25	2007.899087	2007.89903	0.07142857	-1.146128						0.5	None	input	near met. site at Carreg Wen	yes	no		no	7	Saturday	38	16
904	CR904	CR	2007.11.25 11:00	2007.11.25 07:30	2007.11.25 04:00	2007.11.25 11:00	2007	11	25	11:00	2007.11.25	2007.899886	2007.899486	0							0	None	input	near met. site at Carreg Wen	no	no		no	7	Sunday	38	17
905	CR905	CR	2007.11.25 18:00	2007.11.25 16:30	2007.11.25 11:00	2007.11.25 18:00	2007	11	25	18:00	2007.11.25	2007.900685	2007.900514	0.07142857	-1.146128						0.5	None	input	near met. site at Carreg Wen	no	no		no	14	Sunday	38	18
906	CR906	CR	2007.11.26 01:00	2007.11.25 20:15	2007.11.25 18:00	2007.11.26 01:00	2007	11	26	01:00	2007.11.26	2007.901484	2007.900942	0.28571429	-0.544068	6.13	-3.321	-8.634222697			2	None	input	near met. site at Carreg Wen	yes	yes	yes	no	21	Sunday	38	19	-3.321	-9.318	6.13
907	CR907	CR	2007.11.26 08:00	2007.11.26 03:00	2007.11.26 01:00	2007.11.26 08:00	2007	11	26	08:00	2007.11.26	2007.902283	2007.901712	0.14285714	-0.845098	4.62	-3.04	-9.143222697			1	None	input	near met. site at Carreg Wen	yes	yes	yes	no	7	Monday	38	20	-3.04	-9.827	4.62
908	CR908	CR	2007.11.26 15:00	2007.11.26 10:30	2007.11.26 08:00	2007.11.26 15:00	2007	11	26	15:00	2007.11.26	2007.903082	2007.902569	0.07142857	-1.146128						0.5	None	input	near met. site at Carreg Wen	no	no		no	7	Monday	38	21
909	CR909	CR	2007.11.26 22:00	2007.11.26 20:30	2007.11.26 15:00	2007.11.26 22:00	2007	11	26	22:00	2007.11.26	2007.903881	2007.90371	0.28571429	-0.544068						2	None	input	near met. site at Carreg Wen	yes	no		no	14	Monday	38	22
910	CR910	CR	2007.11.27 05:00	2007.11.27 01:47	2007.11.26 22:00	2007.11.27 05:00	2007	11	27	05:00	2007.11.27	2007.90468	2007.904313	0.5	-0.30103	0.6	-4.488	-21.6302227			3.5	None	input	near met. site at Carreg Wen	yes	yes	yes	no	7	Monday	38	23	-4.488	-22.314	0.6
911	CR911	CR	2007.11.27 12:00	2007.11.27 08:30	2007.11.27 05:00	2007.11.27 12:00	2007	11	27	12:00	2007.11.27	2007.90548	2007.90508	0							0	None	input	near met. site at Carreg Wen	no	no		no	7	Tuesday	38	24
912	CR912	CR	2007.11.27 19:00	2007.11.27 18:00	2007.11.27 12:00	2007.11.27 19:00	2007	11	27	19:00	2007.11.27	2007.906279	2007.906164	0.14285714	-0.845098						1	Sampler failed see full notes on paper lab sheet	input	near met. site at Carreg Wen	no	no		no	14	Tuesday	39	1
913	CR913	CR	2007.11.28 02:00	2007.11.27 22:30	2007.11.27 19:00	2007.11.28 02:00	2007	11	28	02:00	2007.11.28	2007.907078	2007.906678	0.28571429	-0.544068						2	Sampler failed	input	near met. site at Carreg Wen	no	no		no	21	Tuesday	39	2
914	CR914	CR	2007.11.28 09:00	2007.11.28 05:15	2007.11.28 02:00	2007.11.28 09:00	2007	11	28	09:00	2007.11.28	2007.907877	2007.907449	0.28571429	-0.544068						2	Sampler failed	input	near met. site at Carreg Wen	no	no		no	28	Wednesday	39	3
915	CR915	CR	2007.11.28 16:00	2007.11.28 12:43	2007.11.28 09:00	2007.11.28 16:00	2007	11	28	16:00	2007.11.28	2007.908676	2007.908302	1.28571429	0.10914447						9	Sampler failed	input	near met. site at Carreg Wen	no	no		no	35	Wednesday	39	4
916	CR916	CR	2007.11.28 23:00	2007.11.28 21:54	2007.11.28 16:00	2007.11.28 23:00	2007	11	28	23:00	2007.11.28	2007.909475	2007.909349	0.71428571	-0.146128						5	Sampler failed	input	near met. site at Carreg Wen	no	no		no	42	Wednesday	39	5
917	CR917	CR	2007.11.29 06:00	2007.11.29 02:21	2007.11.28 23:00	2007.11.29 06:00	2007	11	29	06:00	2007.11.29	2007.910274	2007.909858	0.5	-0.30103						3.5	Sampler failed	input	near met. site at Carreg Wen	no	no		no	49	Wednesday	39	6
918	CR918	CR	2007.11.29 13:00	2007.11.29 09:30	2007.11.29 06:00	2007.11.29 13:00	2007	11	29	13:00	2007.11.29	2007.911073	2007.910674	0							0	Sampler failed	input	near met. site at Carreg Wen	no	no		no	56	Thursday	39	7
919	CR919	CR	2007.11.29 20:00	2007.11.29 16:30	2007.11.29 13:00	2007.11.29 20:00	2007	11	29	20:00	2007.11.29	2007.911872	2007.911473	0							0	Sampler failed	input	near met. site at Carreg Wen	no	no		no	63	Thursday	39	8
920	CR920	CR	2007.11.30 03:00	2007.11.30 00:43	2007.11.29 20:00	2007.11.30 03:00	2007	11	30	03:00	2007.11.30	2007.912671	2007.912411	1.92857143	0.28523573						13.5	Sampler failed	input	near met. site at Carreg Wen	no	no		no	70	Thursday	39	9
921	CR921	CR	2007.11.30 10:00	2007.11.30 06:03	2007.11.30 03:00	2007.11.30 10:00	2007	11	30	10:00	2007.11.30	2007.91347	2007.913021	1.14285714	0.05799195						8	Sampler failed	input	near met. site at Carreg Wen	no	no		no	77	Friday	39	10
922	CR922	CR	2007.11.30 17:00	2007.11.30 15:04	2007.11.30 10:00	2007.11.30 17:00	2007	11	30	17:00	2007.11.30	2007.914269	2007.914049	2	0.30103						14	Sampler failed	input	near met. site at Carreg Wen	no	no		no	84	Friday	39	11
923	CR923	CR	2007.12.01 00:00	2007.11.30 21:27	2007.11.30 17:00	2007.12.01 00:00	2007	12	1	00:00	2007.12.01	2007.915069	2007.914779	1.92857143	0.28523573						13.5	Sampler failed	input	near met. site at Carreg Wen	no	no		no	91	Friday	39	12
924	CR924	CR	2007.12.01 07:00	2007.12.01 03:10	2007.12.01 00:00	2007.12.01 07:00	2007	12	1	07:00	2007.12.01	2007.915868	2007.91543	0.21428571	-0.6690068						1.5	Sampler failed	input	near met. site at Carreg Wen	no	no		no	98	Saturday	39	13
925	CR925	CR	2007.12.01 14:00	2007.12.01 11:02	2007.12.01 07:00	2007.12.01 14:00	2007	12	1	14:00	2007.12.01	2007.916667	2007.916328	1.07142857	0.02996322						7.5	Sampler failed	input	near met. site at Carreg Wen	no	no		no	105	Saturday	39	14
926	CR926	CR	2007.12.01 21:00	2007.12.01 16:22	2007.12.01 14:00	2007.12.01 21:00	2007	12	1	21:00	2007.12.01	2007.917466	2007.916939	1.21428571	0.08432089						8.5	Sampler failed	input	near met. site at Carreg Wen	no	no		no	112	Saturday	39	15
927	CR927	CR	2007.12.02 04:00	2007.12.02 03:30	2007.12.01 21:00	2007.12.02 04:00	2007	12	2	04:00	2007.12.02	2007.918265	2007.918208	0.78571429	-0.1047354						5.5	Sampler failed	input	near met. site at Carreg Wen	no	no		no	119	Saturday	39	16
928	CR928	CR	2007.12.02 11:00	2007.12.02 05:52	2007.12.02 04:00	2007.12.02 11:00	2007	12	2	11:00	2007.12.02	2007.919064	2007.918478	2.71428571	0.43365556						19	Sampler failed	input	near met. site at Carreg Wen	no	no		no	126	Sunday	39	17
929	CR929	CR	2007.12.02 18:00	2007.12.02 17:07	2007.12.02 11:00	2007.12.02 18:00	2007	12	2	18:00	2007.12.02	2007.919863	2007.919763	0.57142857	-0.243038						4	Sampler failed	input	near met. site at Carreg Wen	no	no		no	133	Sunday	39	18
930	CR930	CR	2007.12.03 01:00	2007.12.02 19:57	2007.12.02 18:00	2007.12.03 01:00	2007	12	3	01:00	2007.12.03	2007.920662	2007.920086	0.78571429	-0.1047354						5.5	Sampler failed	input	near met. site at Carreg Wen	no	no		no	140	Sunday	39	19
931	CR931	CR	2007.12.03 08:00	2007.12.03 06:30	2007.12.03 01:00	2007.12.03 08:00	2007	12	3	08:00	2007.12.03	2007.921461	2007.92129	0.21428571	-0.6690068						1.5	Sampler failed	input	near met. site at Carreg Wen	no	no		no	147	Monday	39	20
932	CR932	CR	2007.12.03 15:00	2007.12.03 08:40	2007.12.03 08:00	2007.12.03 15:00	2007	12	3	15:00	2007.12.03	2007.92226	2007.921538	1.21428571	0.08432089						8.5	Sampler failed	input	near met. site at Carreg Wen	no	no		no	154	Monday	39	21
933	CR933	CR	2007.12.03 22:00	2007.12.03 17:10	2007.12.03 15:00	2007.12.03 22:00	2007	12	3	22:00	2007.12.03	2007.923059	2007.922508	0.64285714	-0.1918855						4.5	Sampler failed	input	near met. site at Carreg Wen	no	no		no	161	Monday	39	22
934	CR934	CR	2007.12.04 05:00	2007.12.04 04:30	2007.12.03 22:00	2007.12.04 05:00	2007	12	4	05:00	2007.12.04	2007.923858	2007.923801	0.14285714	-0.845098						1	Sampler failed	input	near met. site at Carreg Wen	no	no		no	168	Monday	39	23
935	CR935	CR	2007.12.04 12:00	2007.12.04 08:30	2007.12.04 05:00	2007.12.04 12:00	2007	12	4	12:00	2007.12.04	2007.924658	2007.924258	0.64285714	-0.1918855						4.5	Sampler failed	input	near met. site at Carreg Wen	no	no		no	175	Tuesday	39	24
936	CR936	CR	2007.12.04 19:00	2007.12.04 15:51	2007.12.04 12:00	2007.12.04 19:00	2007	12	4	19:00	2007.12.04	2007.925457	2007.925098	1	0						7	Sampler failed see full notes on original lab sheet	input	near met. site at Carreg Wen	no	no		no	182	Tuesday	40	1
937	CR937	CR	2007.12.05 02:00	2007.12.04 23:27	2007.12.04 19:00	2007.12.05 02:00	2007	12	5	02:00	2007.12.05	2007.926256	2007.925966	1.85714286	0.26884531						13	Sampler failed	input	near met. site at Carreg Wen	no	no		no	189	Tuesday	40	2
938	CR938	CR	2007.12.05 09:00	2007.12.05 03:55	2007.12.05 02:00	2007.12.05 09:00	2007	12	5	09:00	2007.12.05	2007.927055	2007.926476	3.14285714	0.49732464						22	Sampler failed	input	near met. site at Carreg Wen	no	no		no	196	Wednesday	40	3
939	CR939	CR	2007.12.05 16:00	2007.12.05 10:30	2007.12.05 09:00	2007.12.05 16:00	2007	12	5	16:00	2007.12.05	2007.927854	2007.927226	0.14285714	-0.845098						1	Sampler failed	input	near met. site at Carreg Wen	no	no		no	203	Wednesday	40	4
940	CR940	CR	2007.12.05 23:00	2007.12.05 19:30	2007.12.05 16:00	2007.12.05 23:00	2007	12	5	23:00	2007.12.05	2007.928653	2007.928253	0							0	Sampler failed	input	near met. site at Carreg Wen	no	no		no	210	Wednesday	40	5
941	CR941	CR	2007.12.06 06:00	2007.12.06 03:26	2007.12.05 23:00	2007.12.06 06:00	2007	12	6	06:00	2007.12.06	2007.929452	2007.92916	2.42857143	0.38535088						17	Sampler failed	input	near met. site at Carreg Wen	no	no		no	217	Wednesday	40	6
942	CR942	CR	2007.12.06 13:00	2007.12.06 08:10	2007.12.06 06:00	2007.12.06 13:00	2007	12	6	13:00	2007.12.06	2007.930251	2007.9297	3.5	0.54406804						24.5	Sampler failed	input	near met. site at Carreg Wen	no	no		no	224	Thursday	40	7
943	CR943	CR	2007.12.06 20:00	2007.12.06 16:08	2007.12.06 13:00	2007.12.06 20:00	2007	12	6	20:00	2007.12.06	2007.93105	2007.930611	6.5	0.81291336						45.5	Sampler failed	input	near met. site at Carreg Wen	no	no		no	231	Thursday	40	8
944	CR944	CR	2007.12.07 03:00	2007.12.06 22:27	2007.12.06 20:00	2007.12.07 03:00	2007	12	7	03:00	2007.12.07	2007.931849	2007.931331	1.64285714	0.2155998						11.5	Sampler failed	input	near met. site at Carreg Wen	no	no		no	238	Thursday	40	9
945	CR945	CR	2007.12.07 10:00	2007.12.07 06:42	2007.12.07 03:00	2007.12.07 10:00	2007	12	7	10:00	2007.12.07	2007.932648	2007.932272	1.07142857	0.02996322						7.5	Sampler failed	input	near met. site at Carreg Wen	no	no		no	245	Friday	40	10
946	CR946	CR	2007.12.07 17:00	2007.12.07 13:30	2007.12.07 10:00	2007.12.07 17:00	2007	12	7	17:00	2007.12.07	2007.933448	2007.933048	0.21428571	-0.6690068						1.5	Sampler failed	input	near met. site at Carreg Wen	no	no		no	252	Friday	40	11
947	CR947	CR	2007.12.08 00:00	2007.12.07 23:00	2007.12.07 17:00	2007.12.08 00:00	2007	12	8	00:00	2007.12.08	2007.934247	2007.934132	0.14285714	-0.845098						1	Sampler failed	input	near met. site at Carreg Wen	no	no		no	259	Friday	40	12
948	CR948	CR	2007.12.08 07:00	2007.12.08 04:15	2007.12.08 00:00	2007.12.08 07:00	2007	12	8	07:00	2007.12.08	2007.935046	2007.934732	0.28571429	-0.544068						2	Sampler failed	input	near met. site at Carreg Wen	no	no		no	266	Saturday	40	13
949	CR949	CR	2007.12.08 14:00	2007.12.08 11:10	2007.12.08 07:00	2007.12.08 14:00	2007	12	8	14:00	2007.12.08	2007.935845	2007.935522	2.64285714	0.42207369						18.5	Sampler failed	input	near met. site at Carreg Wen	no	no		no	273	Saturday	40	14
950	CR950	CR	2007.12.08 21:00	2007.12.08 16:38	2007.12.08 14:00	2007.12.08 21:00	2007	12	8	21:00	2007.12.08	2007.936644	2007.936146	0.5	-0.30103						3.5	Sampler failed	input	near met. site at Carreg Wen	no	no		no	280	Saturday	40	15
951	CR951	CR	2007.12.09 04:00	2007.12.09 03:04	2007.12.08 21:00	2007.12.09 04:00	2007	12	9	04:00	2007.12.09	2007.937443	2007.937337	0.5	-0.30103						3.5	Sampler failed	input	near met. site at Carreg Wen	no	no		no	287	Saturday	40	16
952	CR952	CR	2007.12.09 11:00	2007.12.09 06:05	2007.12.09 04:00	2007.12.09 11:00	2007	12	9	11:00	2007.12.09	2007.938242	2007.937681	1.71428571	0.23408321						12	Sampler failed	input	near met. site at Carreg Wen	no	no		no	294	Sunday	40	17
953	CR953	CR	2007.12.09 18:00	2007.12.09 15:42	2007.12.09 11:00	2007.12.09 18:00	2007	12	9	18:00	2007.12.09	2007.939041	2007.938779	0.71428571	-0.146128						5	Sampler failed	input	near met. site at Carreg Wen	no	no		no	301	Sunday	40	18
954	CR954	CR	2007.12.10 01:00	2007.12.09 21:30	2007.12.09 18:00	2007.12.10 01:00	2007	12	10	01:00	2007.12.10	2007.93984	2007.939441	0.07142857	-1.146128						0.5	Sampler failed	input	near met. site at Carreg Wen	no	no		no	308	Sunday	40	19
955	CR955	CR	2007.12.10 08:00	2007.12.10 04:30	2007.12.10 01:00	2007.12.10 08:00	2007	12	10	08:00	2007.12.10	2007.940639	2007.94024	0							0	Sampler failed	input	near met. site at Carreg Wen	no	no		no	315	Monday	40	20
956	CR956	CR	2007.12.10 15:00	2007.12.10 11:30	2007.12.10 08:00	2007.12.10 15:00	2007	12	10	15:00	2007.12.10	2007.941438	2007.941039	0							0	Sampler failed	input	near met. site at Carreg Wen	no	no		no	322	Monday	40	21
957	CR957	CR	2007.12.10 22:00	2007.12.10 18:30	2007.12.10 15:00	2007.12.10 22:00	2007	12	10	22:00	2007.12.10	2007.942237	2007.941838	0							0	Sampler failed	input	near met. site at Carreg Wen	no	no		no	329	Monday	40	22
958	CR958	CR	2007.12.11 05:00	2007.12.11 01:30	2007.12.10 22:00	2007.12.11 05:00	2007	12	11	05:00	2007.12.11	2007.943037	2007.942637	0							0	Sampler failed	input	near met. site at Carreg Wen	no	no		no	336	Monday	40	23
959	CR959	CR	2007.12.11 12:00	2007.12.11 08:30	2007.12.11 05:00	2007.12.11 12:00	2007	12	11	12:00	2007.12.11	2007.943836	2007.943436	0							0	Sampler failed	input	near met. site at Carreg Wen	no	no		no	343	Tuesday	40	24
960	CR960	CR	2007.12.11 19:00	2007.12.11 15:30	2007.12.11 12:00	2007.12.11 19:00	2007	12	11	19:00	2007.12.11	2007.944635	2007.944235	0							0	Sampler working	input	near met. site at Carreg Wen	yes	no		no	350	Tuesday	41	1
961	CR961	CR	2007.12.12 02:00	2007.12.11 22:30	2007.12.11 19:00	2007.12.12 02:00	2007	12	12	02:00	2007.12.12	2007.945434	2007.945034	0							0	None	input	near met. site at Carreg Wen	yes	no		no	7	Tuesday	41	2
962	CR962	CR	2007.12.12 09:00	2007.12.12 05:30	2007.12.12 02:00	2007.12.12 09:00	2007	12	12	09:00	2007.12.12	2007.946233	2007.945833	0							0	None	input	near met. site at Carreg Wen	yes	no		no	7	Wednesday	41	3
963	CR963	CR	2007.12.12 16:00	2007.12.12 12:30	2007.12.12 09:00	2007.12.12 16:00	2007	12	12	16:00	2007.12.12	2007.947032	2007.946632	0							0	None	input	near met. site at Carreg Wen	yes	no		no	7	Wednesday	41	4
964	CR964	CR	2007.12.12 23:00	2007.12.12 19:30	2007.12.12 16:00	2007.12.12 23:00	2007	12	12	23:00	2007.12.12	2007.947831	2007.947432	0							0	None	input	near met. site at Carreg Wen	yes	no		no	7	Wednesday	41	5
965	CR965	CR	2007.12.13 06:00	2007.12.13 02:30	2007.12.12 23:00	2007.12.13 06:00	2007	12	13	06:00	2007.12.13	2007.94863	2007.948231	0							0	None	input	near met. site at Carreg Wen	yes	no		no	7	Wednesday	41	6
966	CR966	CR	2007.12.13 13:00	2007.12.13 09:30	2007.12.13 06:00	2007.12.13 13:00	2007	12	13	13:00	2007.12.13	2007.949429	2007.94903	0.07142857	-1.146128						0.5	None	input	near met. site at Carreg Wen	yes	no		no	7	Thursday	41	7
967	CR967	CR	2007.12.13 20:00	2007.12.13 16:30	2007.12.13 13:00	2007.12.13 20:00	2007	12	13	20:00	2007.12.13	2007.950228	2007.949829	0							0	None	input	near met. site at Carreg Wen	yes	no		no	7	Thursday	41	8
968	CR968	CR	2007.12.14 03:00	2007.12.13 23:30	2007.12.13 20:00	2007.12.14 03:00	2007	12	14	03:00	2007.12.14	2007.951027	2007.950628	0							0	None	input	near met. site at Carreg Wen	yes	no		no	7	Thursday	41	9
969	CR969	CR	2007.12.14 10:00	2007.12.14 08:30	2007.12.14 03:00	2007.12.14 10:00	2007	12	14	10:00	2007.12.14	2007.951827	2007.951655	0.07142857	-1.146128						0.5	None	input	near met. site at Carreg Wen	yes	no		no	7	Friday	41	10
970	CR970	CR	2007.12.14 17:00	2007.12.14 13:30	2007.12.14 10:00	2007.12.14 17:00	2007	12	14	17:00	2007.12.14	2007.952626	2007.952226	0							0	None	input	near met. site at Carreg Wen	yes	no		no	7	Friday	41	11
971	CR971	CR	2007.12.15 00:00	2007.12.14 20:30	2007.12.14 17:00	2007.12.15 00:00	2007	12	15	00:00	2007.12.15	2007.953425	2007.953025	0							0	None	input	near met. site at Carreg Wen	yes	no		no	7	Friday	41	12
972	CR972	CR	2007.12.15 07:00	2007.12.15 03:30	2007.12.15 00:00	2007.12.15 07:00	2007	12	15	07:00	2007.12.15	2007.954224	2007.953824	0							0	None	input	near met. site at Carreg Wen	yes	no		no	7	Saturday	41	13
973	CR973	CR	2007.12.15 14:00	2007.12.15 10:30	2007.12.15 07:00	2007.12.15 14:00	2007	12	15	14:00	2007.12.15	2007.955023	2007.954623	0							0	None	input	near met. site at Carreg Wen	yes	no		no	7	Saturday	41	14
974	CR974	CR	2007.12.15 21:00	2007.12.15 17:30	2007.12.15 14:00	2007.12.15 21:00	2007	12	15	21:00	2007.12.15	2007.955822	2007.955422	0							0	None	input	near met. site at Carreg Wen	yes	no		no	7	Saturday	41	15
975	CR975	CR	2007.12.16 04:00	2007.12.16 00:30	2007.12.15 21:00	2007.12.16 04:00	2007	12	16	04:00	2007.12.16	2007.956621	2007.956222	0							0	None	input	near met. site at Carreg Wen	yes	no		no	7	Saturday	41	16
976	CR976	CR	2007.12.16 11:00	2007.12.16 07:30	2007.12.16 04:00	2007.12.16 11:00	2007	12	16	11:00	2007.12.16	2007.95742	2007.957021	0							0	None	input	near met. site at Carreg Wen	yes	no		no	7	Sunday	41	17
977	CR977	CR	2007.12.16 18:00	2007.12.16 14:30	2007.12.16 11:00	2007.12.16 18:00	2007	12	16	18:00	2007.12.16	2007.958219	2007.95782	0							0	None	input	near met. site at Carreg Wen	yes	no		no	7	Sunday	41	18
978	CR978	CR	2007.12.17 01:00	2007.12.16 21:30	2007.12.16 18:00	2007.12.17 01:00	2007	12	17	01:00	2007.12.17	2007.959018	2007.958619	0							0	None	input	near met. site at Carreg Wen	yes	no		no	7	Sunday	41	19
979	CR979	CR	2007.12.17 08:00	2007.12.17 04:30	2007.12.17 01:00	2007.12.17 08:00	2007	12	17	08:00	2007.12.17	2007.959817	2007.959418	0							0	None	input	near met. site at Carreg Wen	yes	no		no	7	Monday	41	20
980	CR980	CR	2007.12.17 15:00	2007.12.17 11:30	2007.12.17 08:00	2007.12.17 15:00	2007	12	17	15:00	2007.12.17	2007.960616	2007.960217	0							0	None	input	near met. site at Carreg Wen	yes	no		no	7	Monday	41	21
981	CR981	CR	2007.12.17 22:00	2007.12.17 18:30	2007.12.17 15:00	2007.12.17 22:00	2007	12	17	22:00	2007.12.17	2007.961416	2007.961016	0							0	None	input	near met. site at Carreg Wen	yes	no		no	7	Monday	41	22
982	CR982	CR	2007.12.18 05:00	2007.12.18 01:30	2007.12.17 22:00	2007.12.18 05:00	2007	12	18	05:00	2007.12.18	2007.962215	2007.961815	0							0	None	input	near met. site at Carreg Wen	yes	no		no	7	Monday	41	23
983	CR983	CR	2007.12.18 12:00	2007.12.18 08:30	2007.12.18 05:00	2007.12.18 12:00	2007	12	18	12:00	2007.12.18	2007.963014	2007.962614	0							0	None	input	near met. site at Carreg Wen	yes	no		no	7	Tuesday	41	24
984	CR984	CR	2007.12.18 19:00	2007.12.18 15:30	2007.12.18 12:00	2007.12.18 19:00	2007	12	18	19:00	2007.12.18	2007.963813	2007.963413	0							0	None	input	near met. site at Carreg Wen	no	no		no	7	Tuesday	42	1
985	CR985	CR	2007.12.19 02:00	2007.12.18 22:30	2007.12.18 19:00	2007.12.19 02:00	2007	12	19	02:00	2007.12.19	2007.964612	2007.964212	0							0	None	input	near met. site at Carreg Wen	no	no		no	14	Tuesday	42	2
986	CR986	CR	2007.12.19 09:00	2007.12.19 05:30	2007.12.19 02:00	2007.12.19 09:00	2007	12	19	09:00	2007.12.19	2007.965411	2007.965011	0							0	None	input	near met. site at Carreg Wen	no	no		no	21	Wednesday	42	3
987	CR987	CR	2007.12.19 16:00	2007.12.19 12:30	2007.12.19 09:00	2007.12.19 16:00	2007	12	19	16:00	2007.12.19	2007.96621	2007.965811	0							0	None	input	near met. site at Carreg Wen	no	no		no	28	Wednesday	42	4
988	CR988	CR	2007.12.19 23:00	2007.12.19 19:30	2007.12.19 16:00	2007.12.19 23:00	2007	12	19	23:00	2007.12.19	2007.967009	2007.96661	0							0	None	input	near met. site at Carreg Wen	no	no		no	35	Wednesday	42	5
989	CR989	CR	2007.12.20 06:00	2007.12.20 02:30	2007.12.19 23:00	2007.12.20 06:00	2007	12	20	06:00	2007.12.20	2007.967808	2007.967409	0							0	None	input	near met. site at Carreg Wen	no	no		no	42	Wednesday	42	6
990	CR990	CR	2007.12.20 13:00	2007.12.20 09:30	2007.12.20 06:00	2007.12.20 13:00	2007	12	20	13:00	2007.12.20	2007.968607	2007.968208	0							0	None	input	near met. site at Carreg Wen	no	no		no	49	Thursday	42	7
991	CR991	CR	2007.12.20 20:00	2007.12.20 16:30	2007.12.20 13:00	2007.12.20 20:00	2007	12	20	20:00	2007.12.20	2007.969406	2007.969007	0							0	None	input	near met. site at Carreg Wen	no	no		no	56	Thursday	42	8
992	CR992	CR	2007.12.21 03:00	2007.12.20 23:30	2007.12.20 20:00	2007.12.21 03:00	2007	12	21	03:00	2007.12.21	2007.970206	2007.969806	0		9.37					0	None	input	near met. site at Carreg Wen	yes	no		no	63	Thursday	42	9			9.37
993	CR993	CR	2007.12.21 10:00	2007.12.21 06:30	2007.12.21 03:00	2007.12.21 10:00	2007	12	21	10:00	2007.12.21	2007.971005	2007.970605	0							0	None	input	near met. site at Carreg Wen	no	no		no	7	Friday	42	10
994	CR994	CR	2007.12.21 17:00	2007.12.21 13:30	2007.12.21 10:00	2007.12.21 17:00	2007	12	21	17:00	2007.12.21	2007.971804	2007.971404	0							0	None	input	near met. site at Carreg Wen	no	no		no	14	Friday	42	11
995	CR995	CR	2007.12.22 00:00	2007.12.21 20:30	2007.12.21 17:00	2007.12.22 00:00	2007	12	22	00:00	2007.12.22	2007.972603	2007.972203	0							0	None	input	near met. site at Carreg Wen	no	no		no	21	Friday	42	12
996	CR996	CR	2007.12.22 07:00	2007.12.22 05:30	2007.12.22 00:00	2007.12.22 07:00	2007	12	22	07:00	2007.12.22	2007.973402	2007.973231	0.07142857	-1.146128						0.5	None	input	near met. site at Carreg Wen	no	no		no	28	Saturday	42	13
997	CR997	CR	2007.12.22 14:00	2007.12.22 11:45	2007.12.22 07:00	2007.12.22 14:00	2007	12	22	14:00	2007.12.22	2007.974201	2007.973944	0.57142857	-0.243038	14.7					4	None	input	near met. site at Carreg Wen	yes	no		no	35	Saturday	42	14			14.7
998	CR998	CR	2007.12.22 21:00	2007.12.22 17:30	2007.12.22 14:00	2007.12.22 21:00	2007	12	22	21:00	2007.12.22	2007.975	2007.974601	0							0	None	input	near met. site at Carreg Wen	no	no		no	7	Saturday	42	15
999	CR999	CR	2007.12.23 04:00	2007.12.23 00:30	2007.12.22 21:00	2007.12.23 04:00	2007	12	23	04:00	2007.12.23	2007.975799	2007.9754	0							0	None	input	near met. site at Carreg Wen	no	no		no	14	Saturday	42	16
1000	CR1000	CR	2007.12.23 11:00	2007.12.23 09:30	2007.12.23 04:00	2007.12.23 11:00	2007	12	23	11:00	2007.12.23	2007.976598	2007.976427	0.07142857	-1.146128						0.5	None	input	near met. site at Carreg Wen	no	no		no	21	Sunday	42	17
1001	CR1001	CR	2007.12.23 18:00	2007.12.23 14:30	2007.12.23 11:00	2007.12.23 18:00	2007	12	23	18:00	2007.12.23	2007.977397	2007.976998	0							0	None	input	near met. site at Carreg Wen	no	no		no	28	Sunday	42	18
1002	CR1002	CR	2007.12.24 01:00	2007.12.23 21:30	2007.12.23 18:00	2007.12.24 01:00	2007	12	24	01:00	2007.12.24	2007.978196	2007.977797	0							0	None	input	near met. site at Carreg Wen	no	no		no	35	Sunday	42	19
1003	CR1003	CR	2007.12.24 08:00	2007.12.24 07:30	2007.12.24 01:00	2007.12.24 08:00	2007	12	24	08:00	2007.12.24	2007.978995	2007.978938	0.42857143	-0.3679768						3	None	input	near met. site at Carreg Wen	no	no		no	42	Monday	42	20
1004	CR1004	CR	2007.12.24 15:00	2007.12.24 11:05	2007.12.24 08:00	2007.12.24 15:00	2007	12	24	15:00	2007.12.24	2007.979795	2007.979347	2.57142857	0.41017447	3.44					18	None	input	near met. site at Carreg Wen	yes	no		no	49	Monday	42	21			3.44
1005	CR1005	CR	2007.12.24 22:00	2007.12.24 17:54	2007.12.24 15:00	2007.12.24 22:00	2007	12	24	22:00	2007.12.24	2007.980594	2007.980126	1.78571429	0.25181197						12.5	None	input	near met. site at Carreg Wen	no	no		no	7	Monday	42	22
1006	CR1006	CR	2007.12.25 05:00	2007.12.24 23:30	2007.12.24 22:00	2007.12.25 05:00	2007	12	25	05:00	2007.12.25	2007.981393	2007.980765	0.07142857	-1.146128						0.5	None	input	near met. site at Carreg Wen	no	no		no	14	Monday	42	23
1007	CR1007	CR	2007.12.25 12:00	2007.12.25 06:30	2007.12.25 05:00	2007.12.25 12:00	2007	12	25	12:00	2007.12.25	2007.982192	2007.981564	0.07142857	-1.146128						0.5	None	input	near met. site at Carreg Wen	no	no		no	21	Tuesday	42	24
1008	CR1008	CR	2007.12.25 19:00	2007.12.25 18:30	2007.12.25 12:00	2007.12.25 19:00	2007	12	25	19:00	2007.12.25	2007.982991	2007.982934	0.57142857	-0.243038						4	None	input	near met. site at Carreg Wen	no	no		no	28	Tuesday	43	1
1009	CR1009	CR	2007.12.26 02:00	2007.12.25 19:43	2007.12.25 19:00	2007.12.26 02:00	2007	12	26	02:00	2007.12.26	2007.98379	2007.983073	0.64285714	-0.1918855						4.5	None	input	near met. site at Carreg Wen	no	no		no	35	Tuesday	43	2
1010	CR1010	CR	2007.12.26 09:00	2007.12.26 05:30	2007.12.26 02:00	2007.12.26 09:00	2007	12	26	09:00	2007.12.26	2007.984589	2007.98419	0							0	None	input	near met. site at Carreg Wen	no	no		no	42	Wednesday	43	3
1011	CR1011	CR	2007.12.26 16:00	2007.12.26 12:30	2007.12.26 09:00	2007.12.26 16:00	2007	12	26	16:00	2007.12.26	2007.985388	2007.984989	0		0.18					0	None	input	near met. site at Carreg Wen	yes	no		no	49	Wednesday	43	4			0.18
1012	CR1012	CR	2007.12.26 23:00	2007.12.26 20:30	2007.12.26 16:00	2007.12.26 23:00	2007	12	26	23:00	2007.12.26	2007.986187	2007.985902	0.07142857	-1.146128	0.15					0.5	None	input	near met. site at Carreg Wen	yes	no		no	7	Wednesday	43	5			0.15
1013	CR1013	CR	2007.12.27 06:00	2007.12.27 02:30	2007.12.26 23:00	2007.12.27 06:00	2007	12	27	06:00	2007.12.27	2007.986986	2007.986587	0		0.66					0	None	input	near met. site at Carreg Wen	yes	no		no	7	Wednesday	43	6			0.66
1014	CR1014	CR	2007.12.27 13:00	2007.12.27 09:13	2007.12.27 06:00	2007.12.27 13:00	2007	12	27	13:00	2007.12.27	2007.987785	2007.987354	2.07142857	0.31626996	17.6					14.5	None	input	near met. site at Carreg Wen	yes	no		no	7	Thursday	43	7			17.6
1015	CR1015	CR	2007.12.27 20:00	2007.12.27 16:30	2007.12.27 13:00	2007.12.27 20:00	2007	12	27	20:00	2007.12.27	2007.988585	2007.988185	0							0	None	input	near met. site at Carreg Wen	no	no		no	7	Thursday	43	8
1016	CR1016	CR	2007.12.28 03:00	2007.12.28 00:20	2007.12.27 20:00	2007.12.28 03:00	2007	12	28	03:00	2007.12.28	2007.989384	2007.989081	0.92857143	-0.0321847	10					6.5	None	input	near met. site at Carreg Wen	yes	no		no	14	Thursday	43	9			10
1017	CR1017	CR	2007.12.28 10:00	2007.12.28 06:24	2007.12.28 03:00	2007.12.28 10:00	2007	12	28	10:00	2007.12.28	2007.990183	2007.989773	4.21428571	0.62472398	0.49					29.5	None	input	near met. site at Carreg Wen	yes	no		no	7	Friday	43	10			0.49
1018	CR1018	CR	2007.12.28 17:00	2007.12.28 13:18	2007.12.28 10:00	2007.12.28 17:00	2007	12	28	17:00	2007.12.28	2007.990982	2007.990559	2.85714286	0.45593196	0.2					20	None	input	near met. site at Carreg Wen	yes	no		no	7	Friday	43	11			0.2
1019	CR1019	CR	2007.12.29 00:00	2007.12.28 20:00	2007.12.28 17:00	2007.12.29 00:00	2007	12	29	00:00	2007.12.29	2007.991781	2007.991324	1.71428571	0.23408321	11.4					12	None	input	near met. site at Carreg Wen	yes	no		no	7	Friday	43	12			11.4
1020	CR1020	CR	2007.12.29 07:00	2007.12.29 01:18	2007.12.29 00:00	2007.12.29 07:00	2007	12	29	07:00	2007.12.29	2007.99258	2007.991929	0.35714286	-0.447158	20.6					2.5	None	input	near met. site at Carreg Wen	yes	no		no	7	Saturday	43	13			20.6
1021	CR1021	CR	2007.12.29 14:00	2007.12.29 10:30	2007.12.29 07:00	2007.12.29 14:00	2007	12	29	14:00	2007.12.29	2007.993379	2007.99298	0.21428571	-0.6690068	68.3					1.5	None	input	near met. site at Carreg Wen	yes	no		yes	7	Saturday	43	14			68.3
1022	CR1022	CR	2007.12.29 21:00	2007.12.29 17:30	2007.12.29 14:00	2007.12.29 21:00	2007	12	29	21:00	2007.12.29	2007.994178	2007.993779	0.07142857	-1.146128	86.2					0.5	None	input	near met. site at Carreg Wen	yes	no		no	7	Saturday	43	15			86.2
1023	CR1023	CR	2007.12.30 04:00	2007.12.30 00:30	2007.12.29 21:00	2007.12.30 04:00	2007	12	30	04:00	2007.12.30	2007.994977	2007.994578	0							0	None	input	near met. site at Carreg Wen	no	no		no	7	Saturday	43	16
1024	CR1024	CR	2007.12.30 11:00	2007.12.30 07:30	2007.12.30 04:00	2007.12.30 11:00	2007	12	30	11:00	2007.12.30	2007.995776	2007.995377	0							0	None	input	near met. site at Carreg Wen	no	no		no	14	Sunday	43	17
1025	CR1025	CR	2007.12.30 18:00	2007.12.30 12:30	2007.12.30 11:00	2007.12.30 18:00	2007	12	30	18:00	2007.12.30	2007.996575	2007.995948	0.07142857	-1.146128	37.8					0.5	None	input	near met. site at Carreg Wen	yes	no		yes	21	Sunday	43	18			37.8
1026	CR1026	CR	2007.12.31 01:00	2007.12.30 21:30	2007.12.30 18:00	2007.12.31 01:00	2007	12	31	01:00	2007.12.31	2007.997374	2007.996975	0							0	None	input	near met. site at Carreg Wen	no	no		no	7	Sunday	43	19
1027	CR1027	CR	2007.12.31 08:00	2007.12.31 04:30	2007.12.31 01:00	2007.12.31 08:00	2007	12	31	08:00	2007.12.31	2007.998174	2007.997774	0							0	None	input	near met. site at Carreg Wen	no	no		no	14	Monday	43	20
1028	CR1028	CR	2007.12.31 15:00	2007.12.31 09:30	2007.12.31 08:00	2007.12.31 15:00	2007	12	31	15:00	2007.12.31	2007.998973	2007.998345	0.07142857	-1.146128						0.5	None	input	near met. site at Carreg Wen	no	no		no	21	Monday	43	21
1029	CR1029	CR	2007.12.31 22:00	2007.12.31 19:30	2007.12.31 15:00	2007.12.31 22:00	2007	12	31	22:00	2007.12.31	2007.999772	2007.999486	0.07142857	-1.146128						0.5	None	input	near met. site at Carreg Wen	no	no		no	28	Monday	43	22
1030	CR1030	CR	2008.01.01 05:00	2008.01.01 01:30	2007.12.31 22:00	2008.01.01 05:00	2008	1	1	05:00	2008.01.01	2008.000569	2008.000171	0							0	None	input	near met. site at Carreg Wen	no	no		no	35	Monday	43	23
1031	CR1031	CR	2008.01.01 12:00	2008.01.01 08:30	2008.01.01 05:00	2008.01.01 12:00	2008	1	1	12:00	2008.01.01	2008.001366	2008.000968	0							0	None	input	near met. site at Carreg Wen	no	no		no	42	Tuesday	43	24
1032	CR1032	CR	2008.01.01 19:00	2008.01.01 15:30	2008.01.01 12:00	2008.01.01 19:00	2008	1	1	19:00	2008.01.01	2008.002163	2008.001765	0							0	None	input	near met. site at Carreg Wen	no	no		no	49	Tuesday	44	1
1033	CR1033	CR	2008.01.02 02:00	2008.01.01 22:30	2008.01.01 19:00	2008.01.02 02:00	2008	1	2	02:00	2008.01.02	2008.00296	2008.002562	0							0	None	input	near met. site at Carreg Wen	no	no		no	56	Tuesday	44	2
1034	CR1034	CR	2008.01.02 09:00	2008.01.02 05:30	2008.01.02 02:00	2008.01.02 09:00	2008	1	2	09:00	2008.01.02	2008.003757	2008.003358	0							0	None	input	near met. site at Carreg Wen	no	no		no	63	Wednesday	44	3
1035	CR1035	CR	2008.01.02 16:00	2008.01.02 12:30	2008.01.02 09:00	2008.01.02 16:00	2008	1	2	16:00	2008.01.02	2008.004554	2008.004155	0							0	None	input	near met. site at Carreg Wen	no	no		no	70	Wednesday	44	4
1036	CR1036	CR	2008.01.02 23:00	2008.01.02 19:30	2008.01.02 16:00	2008.01.02 23:00	2008	1	2	23:00	2008.01.02	2008.005351	2008.004952	0							0	None	input	near met. site at Carreg Wen	no	no		no	77	Wednesday	44	5
1037	CR1037	CR	2008.01.03 06:00	2008.01.03 02:30	2008.01.02 23:00	2008.01.03 06:00	2008	1	3	06:00	2008.01.03	2008.006148	2008.005749	0							0	None	input	near met. site at Carreg Wen	no	no		no	84	Wednesday	44	6
1038	CR1038	CR	2008.01.03 13:00	2008.01.03 09:30	2008.01.03 06:00	2008.01.03 13:00	2008	1	3	13:00	2008.01.03	2008.006944	2008.006546	0							0	None	input	near met. site at Carreg Wen	no	no		no	91	Thursday	44	7
1039	CR1039	CR	2008.01.03 20:00	2008.01.03 16:30	2008.01.03 13:00	2008.01.03 20:00	2008	1	3	20:00	2008.01.03	2008.007741	2008.007343	0							0	None	input	near met. site at Carreg Wen	no	no		no	98	Thursday	44	8
1040	CR1040	CR	2008.01.04 03:00	2008.01.03 23:30	2008.01.03 20:00	2008.01.04 03:00	2008	1	4	03:00	2008.01.04	2008.008538	2008.00814	0							0	None	input	near met. site at Carreg Wen	no	no		no	105	Thursday	44	9
1041	CR1041	CR	2008.01.04 10:00	2008.01.04 06:30	2008.01.04 03:00	2008.01.04 10:00	2008	1	4	10:00	2008.01.04	2008.009335	2008.008937	0							0	None	input	near met. site at Carreg Wen	no	no		no	112	Friday	44	10
1042	CR1042	CR	2008.01.04 17:00	2008.01.04 14:58	2008.01.04 10:00	2008.01.04 17:00	2008	1	4	17:00	2008.01.04	2008.010132	2008.009902	1.5	0.17609126	4.94					10.5	None	input	near met. site at Carreg Wen	yes	no		no	119	Friday	44	11			4.94
1043	CR1043	CR	2008.01.05 00:00	2008.01.04 21:20	2008.01.04 17:00	2008.01.05 00:00	2008	1	5	00:00	2008.01.05	2008.010929	2008.010625	0.42857143	-0.3679768	56.8					3	None	input	near met. site at Carreg Wen	yes	no		yes	7	Friday	44	12			56.8
1044	CR1044	CR	2008.01.05 07:00	2008.01.05 04:54	2008.01.05 00:00	2008.01.05 07:00	2008	1	5	07:00	2008.01.05	2008.011726	2008.011487	0.35714286	-0.447158	47.4					2.5	None	input	near met. site at Carreg Wen	yes	no		no	7	Saturday	44	13			47.4
1045	CR1045	CR	2008.01.05 14:00	2008.01.05 10:30	2008.01.05 07:00	2008.01.05 14:00	2008	1	5	14:00	2008.01.05	2008.012523	2008.012124	0							0	None	input	near met. site at Carreg Wen	no	no		no	7	Saturday	44	14
1046	CR1046	CR	2008.01.05 21:00	2008.01.05 17:30	2008.01.05 14:00	2008.01.05 21:00	2008	1	5	21:00	2008.01.05	2008.01332	2008.012921	0							0	None	input	near met. site at Carreg Wen	no	no		no	14	Saturday	44	15
1047	CR1047	CR	2008.01.06 04:00	2008.01.06 00:30	2008.01.05 21:00	2008.01.06 04:00	2008	1	6	04:00	2008.01.06	2008.014117	2008.013718	0							0	None	input	near met. site at Carreg Wen	no	no		no	21	Saturday	44	16
1048	CR1048	CR	2008.01.06 11:00	2008.01.06 07:30	2008.01.06 04:00	2008.01.06 11:00	2008	1	6	11:00	2008.01.06	2008.014914	2008.014515	0							0	None	input	near met. site at Carreg Wen	no	no		no	28	Sunday	44	17
1049	CR1049	CR	2008.01.06 18:00	2008.01.06 16:15	2008.01.06 11:00	2008.01.06 18:00	2008	1	6	18:00	2008.01.06	2008.01571	2008.015511	0.28571429	-0.544068	36.8					2	None	input	near met. site at Carreg Wen	yes	no		yes	35	Sunday	44	18			36.8
1050	CR1050	CR	2008.01.07 01:00	2008.01.06 19:21	2008.01.06 18:00	2008.01.07 01:00	2008	1	7	01:00	2008.01.07	2008.016507	2008.015865	0.5	-0.30103	7.65					3.5	None	input	near met. site at Carreg Wen	yes	no		no	7	Sunday	44	19			7.65
1051	CR1051	CR	2008.01.07 08:00	2008.01.07 05:30	2008.01.07 01:00	2008.01.07 08:00	2008	1	7	08:00	2008.01.07	2008.017304	2008.01702	0.57142857	-0.243038	272					4	None	input	near met. site at Carreg Wen	yes	no		yes	7	Monday	44	20			272
1052	CR1052	CR	2008.01.07 15:00	2008.01.07 09:37	2008.01.07 08:00	2008.01.07 15:00	2008	1	7	15:00	2008.01.07	2008.018101	2008.017489	0.57142857	-0.243038	33.2					4	None	input	near met. site at Carreg Wen	yes	no		no	7	Monday	44	21			33.2
1053	CR1053	CR	2008.01.07 22:00	2008.01.07 20:00	2008.01.07 15:00	2008.01.07 22:00	2008	1	7	22:00	2008.01.07	2008.018898	2008.01867	0.14285714	-0.845098	74.7					1	None	input	near met. site at Carreg Wen	yes	no		yes	7	Monday	44	22			74.7
1054	CR1054	CR	2008.01.08 05:00	2008.01.08 03:30	2008.01.07 22:00	2008.01.08 05:00	2008	1	8	05:00	2008.01.08	2008.019695	2008.019524	0.92857143	-0.0321847	15.9					6.5	None	input	near met. site at Carreg Wen	yes	no		no	7	Monday	44	23			15.9
1055	CR1055	CR	2008.01.08 12:00	2008.01.08 08:09	2008.01.08 05:00	2008.01.08 12:00	2008	1	8	12:00	2008.01.08	2008.020492	2008.020054	2.5	0.39794001	1.5					17.5	None	input	near met. site at Carreg Wen	yes	no		no	7	Tuesday	44	24			1.5
1056	CR1056	CR	2008.01.08 19:00	2008.01.08 15:10	2008.01.08 12:00	2008.01.08 19:00	2008	1	8	19:00	2008.01.08	2008.021289	2008.020852	0.42857143	-0.3679768	13.8					3	None	input	near met. site at Carreg Wen	yes	no		no	7	Tuesday	45	1			13.8
1057	CR1057	CR	2008.01.09 02:00	2008.01.08 22:30	2008.01.08 19:00	2008.01.09 02:00	2008	1	9	02:00	2008.01.09	2008.022086	2008.021687	0		25					0	None	input	near met. site at Carreg Wen	yes	no		no	7	Tuesday	45	2			25
1058	CR1058	CR	2008.01.09 09:00	2008.01.09 06:00	2008.01.09 02:00	2008.01.09 09:00	2008	1	9	09:00	2008.01.09	2008.022883	2008.022541	0.14285714	-0.845098	32.4					1	None	input	near met. site at Carreg Wen	yes	no		yes	7	Wednesday	45	3			32.4
1059	CR1059	CR	2008.01.09 16:00	2008.01.09 13:34	2008.01.09 09:00	2008.01.09 16:00	2008	1	9	16:00	2008.01.09	2008.023679	2008.023404	0.92857143	-0.0321847	18.2					6.5	None	input	near met. site at Carreg Wen	yes	no		no	7	Wednesday	45	4			18.2
1060	CR1060	CR	2008.01.09 23:00	2008.01.09 19:10	2008.01.09 16:00	2008.01.09 23:00	2008	1	9	23:00	2008.01.09	2008.024476	2008.024041	2	0.30103	9.19					14	None	input	near met. site at Carreg Wen	yes	no		no	7	Wednesday	45	5			9.19
1061	CR1061	CR	2008.01.10 06:00	2008.01.10 01:12	2008.01.09 23:00	2008.01.10 06:00	2008	1	10	06:00	2008.01.10	2008.025273	2008.024727	2.42857143	0.38535088	7.3					17	None	input	near met. site at Carreg Wen	yes	no		no	7	Wednesday	45	6			7.3
1062	CR1062	CR	2008.01.10 13:00	2008.01.10 09:00	2008.01.10 06:00	2008.01.10 13:00	2008	1	10	13:00	2008.01.10	2008.02607	2008.025617	2.35714286	0.3723859	8.35					16.5	None	input	near met. site at Carreg Wen	yes	no		no	7	Thursday	45	7			8.35
1063	CR1063	CR	2008.01.10 20:00	2008.01.10 16:30	2008.01.10 13:00	2008.01.10 20:00	2008	1	10	20:00	2008.01.10	2008.026867	2008.026469	0.07142857	-1.146128	10.3					0.5	None	input	near met. site at Carreg Wen	yes	no		no	7	Thursday	45	8			10.3
1064	CR1064	CR	2008.01.11 03:00	2008.01.10 23:30	2008.01.10 20:00	2008.01.11 03:00	2008	1	11	03:00	2008.01.11	2008.027664	2008.027266	0							0	None	input	near met. site at Carreg Wen	no	no		no	7	Thursday	45	9
1065	CR1065	CR	2008.01.11 10:00	2008.01.11 06:30	2008.01.11 03:00	2008.01.11 10:00	2008	1	11	10:00	2008.01.11	2008.028461	2008.028062	0							0	None	input	near met. site at Carreg Wen	no	no		no	14	Friday	45	10
1066	CR1066	CR	2008.01.11 17:00	2008.01.11 11:30	2008.01.11 10:00	2008.01.11 17:00	2008	1	11	17:00	2008.01.11	2008.029258	2008.028632	0.07142857	-1.146128	6.34					0.5	None	input	near met. site at Carreg Wen	yes	no		no	21	Friday	45	11			6.34
1067	CR1067	CR	2008.01.12 00:00	2008.01.11 20:30	2008.01.11 17:00	2008.01.12 00:00	2008	1	12	00:00	2008.01.12	2008.030055	2008.029656	0							0	None	input	near met. site at Carreg Wen	no	no		no	7	Friday	45	12
1068	CR1068	CR	2008.01.12 07:00	2008.01.12 04:00	2008.01.12 00:00	2008.01.12 07:00	2008	1	12	07:00	2008.01.12	2008.030852	2008.03051	0.14285714	-0.845098	7.63					1	None	input	near met. site at Carreg Wen	yes	no		no	14	Saturday	45	13			7.63
1069	CR1069	CR	2008.01.12 14:00	2008.01.12 10:30	2008.01.12 07:00	2008.01.12 14:00	2008	1	12	14:00	2008.01.12	2008.031649	2008.03125	0							0	None	input	near met. site at Carreg Wen	no	no		no	7	Saturday	45	14
1070	CR1070	CR	2008.01.12 21:00	2008.01.12 18:05	2008.01.12 14:00	2008.01.12 21:00	2008	1	12	21:00	2008.01.12	2008.032445	2008.032113	0.85714286	-0.0669468	1.29					6	None	input	near met. site at Carreg Wen	yes	no		no	14	Saturday	45	15			1.29
1071	CR1071	CR	2008.01.13 04:00	2008.01.12 23:25	2008.01.12 21:00	2008.01.13 04:00	2008	1	13	04:00	2008.01.13	2008.033242	2008.032721	0.92857143	-0.0321847	3.99					6.5	None	input	near met. site at Carreg Wen	yes	no		no	7	Saturday	45	16			3.99
1072	CR1072	CR	2008.01.13 11:00	2008.01.13 08:06	2008.01.13 04:00	2008.01.13 11:00	2008	1	13	11:00	2008.01.13	2008.034039	2008.033709	0.35714286	-0.447158	4.82					2.5	None	input	near met. site at Carreg Wen	yes	no		no	7	Sunday	45	17			4.82
1073	CR1073	CR	2008.01.13 18:00	2008.01.13 15:05	2008.01.13 11:00	2008.01.13 18:00	2008	1	13	18:00	2008.01.13	2008.034836	2008.034504	0.85714286	-0.0669468	1.52					6	None	input	near met. site at Carreg Wen	yes	no		no	7	Sunday	45	18			1.52
1074	CR1074	CR	2008.01.14 01:00	2008.01.13 20:12	2008.01.13 18:00	2008.01.14 01:00	2008	1	14	01:00	2008.01.14	2008.035633	2008.035087	0.71428571	-0.146128	0.94					5	None	input	near met. site at Carreg Wen	yes	no		no	7	Sunday	45	19			0.94
1075	CR1075	CR	2008.01.14 08:00	2008.01.14 04:45	2008.01.14 01:00	2008.01.14 08:00	2008	1	14	08:00	2008.01.14	2008.03643	2008.03606	0.57142857	-0.243038	2.64					4	None	input	near met. site at Carreg Wen	yes	no		no	7	Monday	45	20			2.64
1076	CR1076	CR	2008.01.14 15:00	2008.01.14 11:15	2008.01.14 08:00	2008.01.14 15:00	2008	1	14	15:00	2008.01.14	2008.037227	2008.0368	2	0.30103	13.9					14	None	input	near met. site at Carreg Wen	yes	no		no	7	Monday	45	21			13.9
1077	CR1077	CR	2008.01.14 22:00	2008.01.14 20:30	2008.01.14 15:00	2008.01.14 22:00	2008	1	14	22:00	2008.01.14	2008.038024	2008.037853	1.14285714	0.05799195	18.4					8	None	input	near met. site at Carreg Wen	yes	no		no	7	Monday	45	22			18.4
1078	CR1078	CR	2008.01.15 05:00	2008.01.15 02:30	2008.01.14 22:00	2008.01.15 05:00	2008	1	15	05:00	2008.01.15	2008.038821	2008.038536	2.42857143	0.38535088	0.08					17	None	input	near met. site at Carreg Wen	yes	no		no	7	Monday	45	23			0.08
1079	CR1079	CR	2008.01.15 12:00	2008.01.15 06:03	2008.01.15 05:00	2008.01.15 12:00	2008	1	15	12:00	2008.01.15	2008.039618	2008.03894	1.42857143	0.15490196	0.94					10	None	input	near met. site at Carreg Wen	yes	no		no	7	Tuesday	45	24			0.94
1080	CR1080	CR	2008.01.15 19:00	2008.01.15 17:07	2008.01.15 12:00	2008.01.15 19:00	2008	1	15	19:00	2008.01.15	2008.040414	2008.040201	0.57142857	-0.243038	1					4	None	input	near met. site at Carreg Wen	yes	no		no	7	Tuesday	46	1			1
1081	CR1081	CR	2008.01.16 02:00	2008.01.15 21:30	2008.01.15 19:00	2008.01.16 02:00	2008	1	16	02:00	2008.01.16	2008.041211	2008.040699	0.42857143	-0.3679768	13.2					3	None	input	near met. site at Carreg Wen	yes	no		no	7	Tuesday	46	2			13.2
1082	CR1082	CR	2008.01.16 09:00	2008.01.16 04:30	2008.01.16 02:00	2008.01.16 09:00	2008	1	16	09:00	2008.01.16	2008.042008	2008.041496	0.07142857	-1.146128	16.9					0.5	None	input	near met. site at Carreg Wen	yes	no		no	7	Wednesday	46	3			16.9
1083	CR1083	CR	2008.01.16 16:00	2008.01.16 09:30	2008.01.16 09:00	2008.01.16 16:00	2008	1	16	16:00	2008.01.16	2008.042805	2008.042065	0.07142857	-1.146128						0.5	None	input	near met. site at Carreg Wen	no	no		no	7	Wednesday	46	4
1084	CR1084	CR	2008.01.16 23:00	2008.01.16 20:30	2008.01.16 16:00	2008.01.16 23:00	2008	1	16	23:00	2008.01.16	2008.043602	2008.043317	0.14285714	-0.845098						1	None	input	near met. site at Carreg Wen	no	no		no	14	Wednesday	46	5
1085	CR1085	CR	2008.01.17 06:00	2008.01.17 04:45	2008.01.16 23:00	2008.01.17 06:00	2008	1	17	06:00	2008.01.17	2008.044399	2008.044257	0.28571429	-0.544068	4.03					2	None	input	near met. site at Carreg Wen	yes	no		no	21	Wednesday	46	6			4.03
1086	CR1086	CR	2008.01.17 13:00	2008.01.17 10:20	2008.01.17 06:00	2008.01.17 13:00	2008	1	17	13:00	2008.01.17	2008.045196	2008.044892	0.85714286	-0.0669468	18					6	None	input	near met. site at Carreg Wen	yes	no		no	7	Thursday	46	7			18
1087	CR1087	CR	2008.01.17 20:00	2008.01.17 17:10	2008.01.17 13:00	2008.01.17 20:00	2008	1	17	20:00	2008.01.17	2008.045993	2008.04567	0.64285714	-0.1918855	44.1					4.5	None	input	near met. site at Carreg Wen	yes	no		yes	7	Thursday	46	8			44.1
1088	CR1088	CR	2008.01.18 03:00	2008.01.17 23:30	2008.01.17 20:00	2008.01.18 03:00	2008	1	18	03:00	2008.01.18	2008.04679	2008.046391	0							0	None	input	near met. site at Carreg Wen	no	no		no	7	Thursday	46	9
1089	CR1089	CR	2008.01.18 10:00	2008.01.18 07:28	2008.01.18 03:00	2008.01.18 10:00	2008	1	18	10:00	2008.01.18	2008.047587	2008.047299	3.14285714	0.49732464	22.9					22	None	input	near met. site at Carreg Wen	yes	no		yes	14	Friday	46	10			22.9
1090	CR1090	CR	2008.01.18 17:00	2008.01.18 12:38	2008.01.18 10:00	2008.01.18 17:00	2008	1	18	17:00	2008.01.18	2008.048383	2008.047887	6.85714286	0.8361432						48	None	input	near met. site at Carreg Wen	yes	no		no	7	Friday	46	11
1091	CR1091	CR	2008.01.19 00:00	2008.01.18 21:46	2008.01.18 17:00	2008.01.19 00:00	2008	1	19	00:00	2008.01.19	2008.04918	2008.048927	3.14285714	0.49732464	0.84					22	None	input	near met. site at Carreg Wen	yes	no		no	7	Friday	46	12			0.84
1092	CR1092	CR	2008.01.19 07:00	2008.01.19 02:53	2008.01.19 00:00	2008.01.19 07:00	2008	1	19	07:00	2008.01.19	2008.049977	2008.049509	2.21428571	0.34523366	0.23					15.5	None	input	near met. site at Carreg Wen	yes	no		no	7	Saturday	46	13			0.23
1093	CR1093	CR	2008.01.19 14:00	2008.01.19 10:46	2008.01.19 07:00	2008.01.19 14:00	2008	1	19	14:00	2008.01.19	2008.050774	2008.050407	0.78571429	-0.1047354	0.31					5.5	None	input	near met. site at Carreg Wen	yes	no		no	7	Saturday	46	14			0.31
1094	CR1094	CR	2008.01.19 21:00	2008.01.19 18:04	2008.01.19 14:00	2008.01.19 21:00	2008	1	19	21:00	2008.01.19	2008.051571	2008.051237	4.28571429	0.63202321	0.45					30	None	input	near met. site at Carreg Wen	yes	no		no	7	Saturday	46	15			0.45
1095	CR1095	CR	2008.01.20 04:00	2008.01.19 23:13	2008.01.19 21:00	2008.01.20 04:00	2008	1	20	04:00	2008.01.20	2008.052368	2008.051824	4.35714286	0.6392018	0.99					30.5	None	input	near met. site at Carreg Wen	yes	no		no	7	Saturday	46	16			0.99
1096	CR1096	CR	2008.01.20 11:00	2008.01.20 07:12	2008.01.20 04:00	2008.01.20 11:00	2008	1	20	11:00	2008.01.20	2008.053165	2008.052734	6	0.77815125	0.48					42	None	input	near met. site at Carreg Wen	yes	no		no	7	Sunday	46	17			0.48
1097	CR1097	CR	2008.01.20 18:00	2008.01.20 14:03	2008.01.20 11:00	2008.01.20 18:00	2008	1	20	18:00	2008.01.20	2008.053962	2008.053513	2.42857143	0.38535088	0.21					17	None	input	near met. site at Carreg Wen	yes	no		no	7	Sunday	46	18			0.21
1098	CR1098	CR	2008.01.21 01:00	2008.01.20 22:36	2008.01.20 18:00	2008.01.21 01:00	2008	1	21	01:00	2008.01.21	2008.054759	2008.054487	3.07142857	0.48734042	0.61					21.5	None	input	near met. site at Carreg Wen	yes	no		no	7	Sunday	46	19			0.61
1099	CR1099	CR	2008.01.21 08:00	2008.01.21 04:52	2008.01.21 01:00	2008.01.21 08:00	2008	1	21	08:00	2008.01.21	2008.055556	2008.055201	1.5	0.17609126	7.15					10.5	None	input	near met. site at Carreg Wen	yes	no		no	7	Monday	46	20			7.15
1100	CR1100	CR	2008.01.21 15:00	2008.01.21 09:48	2008.01.21 08:00	2008.01.21 15:00	2008	1	21	15:00	2008.01.21	2008.056353	2008.055761	1.64285714	0.2155998	6.84					11.5	None	input	near met. site at Carreg Wen	yes	no		no	7	Monday	46	21			6.84
1101	CR1101	CR	2008.01.21 22:00	2008.01.21 16:38	2008.01.21 15:00	2008.01.21 22:00	2008	1	21	22:00	2008.01.21	2008.057149	2008.05654	0.5	-0.30103	15.5					3.5	None	input	near met. site at Carreg Wen	yes	no		no	7	Monday	46	22			15.5
1102	CR1102	CR	2008.01.22 05:00	2008.01.22 01:30	2008.01.21 22:00	2008.01.22 05:00	2008	1	22	05:00	2008.01.22	2008.057946	2008.057548	0							0	None	input	near met. site at Carreg Wen	no	no		no	7	Monday	46	23
1103	CR1103	CR	2008.01.22 12:00	2008.01.22 11:30	2008.01.22 05:00	2008.01.22 12:00	2008	1	22	12:00	2008.01.22	2008.058743	2008.058686	0.07142857	-1.146128						0.5	None	input	near met. site at Carreg Wen	no	no		no	14	Tuesday	46	24
1104	CR1104	CR	2008.01.22 19:00	2008.01.22 16:43	2008.01.22 12:00	2008.01.22 19:00	2008	1	22	19:00	2008.01.22	2008.05954	2008.059281	0.64285714	-0.1918855	4.71					4.5	None	input	near met. site at Carreg Wen	yes	no		no	21	Tuesday	47	1			4.71
1105	CR1105	CR	2008.01.23 02:00	2008.01.22 21:36	2008.01.22 19:00	2008.01.23 02:00	2008	1	23	02:00	2008.01.23	2008.060337	2008.059837	1.28571429	0.10914447	2.15					9	None	input	near met. site at Carreg Wen	yes	no		no	7	Tuesday	47	2			2.15
1106	CR1106	CR	2008.01.23 09:00	2008.01.23 06:10	2008.01.23 02:00	2008.01.23 09:00	2008	1	23	09:00	2008.01.23	2008.061134	2008.060811	0.21428571	-0.6690068	5.37					1.5	None	input	near met. site at Carreg Wen	yes	no		no	7	Wednesday	47	3			5.37
1107	CR1107	CR	2008.01.23 16:00	2008.01.23 12:10	2008.01.23 09:00	2008.01.23 16:00	2008	1	23	16:00	2008.01.23	2008.061931	2008.061494	0.64285714	-0.1918855	2.47					4.5	None	input	near met. site at Carreg Wen	yes	no		no	7	Wednesday	47	4			2.47
1108	CR1108	CR	2008.01.23 23:00	2008.01.23 19:54	2008.01.23 16:00	2008.01.23 23:00	2008	1	23	23:00	2008.01.23	2008.062728	2008.062375	1.42857143	0.15490196	1					10	None	input	near met. site at Carreg Wen	yes	no		no	7	Wednesday	47	5			1
1109	CR1109	CR	2008.01.24 06:00	2008.01.24 01:22	2008.01.23 23:00	2008.01.24 06:00	2008	1	24	06:00	2008.01.24	2008.063525	2008.062998	0.57142857	-0.243038	5.29					4	None	input	near met. site at Carreg Wen	yes	no		no	7	Wednesday	47	6			5.29
1110	CR1110	CR	2008.01.24 13:00	2008.01.24 09:30	2008.01.24 06:00	2008.01.24 13:00	2008	1	24	13:00	2008.01.24	2008.064322	2008.063923	0							0	None	input	near met. site at Carreg Wen	no	no		no	7	Thursday	47	7
1111	CR1111	CR	2008.01.24 20:00	2008.01.24 16:30	2008.01.24 13:00	2008.01.24 20:00	2008	1	24	20:00	2008.01.24	2008.065118	2008.06472	0							0	None	input	near met. site at Carreg Wen	no	no		no	14	Thursday	47	8
1112	CR1112	CR	2008.01.25 03:00	2008.01.24 23:30	2008.01.24 20:00	2008.01.25 03:00	2008	1	25	03:00	2008.01.25	2008.065915	2008.065517	0							0	None	input	near met. site at Carreg Wen	no	no		no	21	Thursday	47	9
1113	CR1113	CR	2008.01.25 10:00	2008.01.25 06:30	2008.01.25 03:00	2008.01.25 10:00	2008	1	25	10:00	2008.01.25	2008.066712	2008.066314	0							0	None	input	near met. site at Carreg Wen	no	no		no	28	Friday	47	10
1114	CR1114	CR	2008.01.25 17:00	2008.01.25 13:30	2008.01.25 10:00	2008.01.25 17:00	2008	1	25	17:00	2008.01.25	2008.067509	2008.067111	0							0	None	input	near met. site at Carreg Wen	no	no		no	35	Friday	47	11
1115	CR1115	CR	2008.01.26 00:00	2008.01.25 20:30	2008.01.25 17:00	2008.01.26 00:00	2008	1	26	00:00	2008.01.26	2008.068306	2008.067908	0							0	None	input	near met. site at Carreg Wen	no	no		no	42	Friday	47	12
1116	CR1116	CR	2008.01.26 07:00	2008.01.26 05:10	2008.01.26 00:00	2008.01.26 07:00	2008	1	26	07:00	2008.01.26	2008.069103	2008.068894	0.21428571	-0.6690068	70.8					1.5	None	input	near met. site at Carreg Wen	yes	no		yes	49	Saturday	47	13			70.8
1117	CR1117	CR	2008.01.26 14:00	2008.01.26 10:30	2008.01.26 07:00	2008.01.26 14:00	2008	1	26	14:00	2008.01.26	2008.0699	2008.069501	0							0	None	input	near met. site at Carreg Wen	no	no		no	7	Saturday	47	14
1118	CR1118	CR	2008.01.26 21:00	2008.01.26 17:30	2008.01.26 14:00	2008.01.26 21:00	2008	1	26	21:00	2008.01.26	2008.070697	2008.070298	0							0	None	input	near met. site at Carreg Wen	no	no		no	14	Saturday	47	15
1119	CR1119	CR	2008.01.27 04:00	2008.01.27 00:30	2008.01.26 21:00	2008.01.27 04:00	2008	1	27	04:00	2008.01.27	2008.071494	2008.071095	0							0	None	input	near met. site at Carreg Wen	no	no		no	21	Saturday	47	16
1120	CR1120	CR	2008.01.27 11:00	2008.01.27 07:30	2008.01.27 04:00	2008.01.27 11:00	2008	1	27	11:00	2008.01.27	2008.072291	2008.071892	0							0	None	input	near met. site at Carreg Wen	no	no		no	28	Sunday	47	17
1121	CR1121	CR	2008.01.27 18:00	2008.01.27 14:30	2008.01.27 11:00	2008.01.27 18:00	2008	1	27	18:00	2008.01.27	2008.073087	2008.072689	0							0	None	input	near met. site at Carreg Wen	no	no		no	35	Sunday	47	18
1122	CR1122	CR	2008.01.28 01:00	2008.01.27 21:30	2008.01.27 18:00	2008.01.28 01:00	2008	1	28	01:00	2008.01.28	2008.073884	2008.073486	0							0	None	input	near met. site at Carreg Wen	no	no		no	42	Sunday	47	19
1123	CR1123	CR	2008.01.28 08:00	2008.01.28 04:30	2008.01.28 01:00	2008.01.28 08:00	2008	1	28	08:00	2008.01.28	2008.074681	2008.074283	0							0	None	input	near met. site at Carreg Wen	no	no		no	49	Monday	47	20
1124	CR1124	CR	2008.01.28 15:00	2008.01.28 11:30	2008.01.28 08:00	2008.01.28 15:00	2008	1	28	15:00	2008.01.28	2008.075478	2008.07508	0							0	None	input	near met. site at Carreg Wen	no	no		no	56	Monday	47	21
1125	CR1125	CR	2008.01.28 22:00	2008.01.28 21:30	2008.01.28 15:00	2008.01.28 22:00	2008	1	28	22:00	2008.01.28	2008.076275	2008.076218	0.07142857	-1.146128						0.5	None	input	near met. site at Carreg Wen	no	no		no	63	Monday	47	22
1126	CR1126	CR	2008.01.29 05:00	2008.01.29 04:10	2008.01.28 22:00	2008.01.29 05:00	2008	1	29	05:00	2008.01.29	2008.077072	2008.076977	0.21428571	-0.6690068	37.2					1.5	None	input	near met. site at Carreg Wen	yes	no		yes	70	Monday	47	23			37.2
1127	CR1127	CR	2008.01.29 12:00	2008.01.29 08:30	2008.01.29 05:00	2008.01.29 12:00	2008	1	29	12:00	2008.01.29	2008.077869	2008.07747	0		10.4					0	None	input	near met. site at Carreg Wen	yes	no		no	7	Tuesday	47	24			10.4
1128	CR1128	CR	2008.01.29 19:00	2008.01.29 14:57	2008.01.29 12:00	2008.01.29 19:00	2008	1	29	19:00	2008.01.29	2008.078666	2008.078205	1.57142857	0.19629465						11	None	input	near met. site at Carreg Wen	no	no		no	7	Tuesday	48	1
1129	CR1129	CR	2008.01.30 02:00	2008.01.29 19:30	2008.01.29 19:00	2008.01.30 02:00	2008	1	30	02:00	2008.01.30	2008.079463	2008.078723	0.07142857	-1.146128	5.18					0.5	None	input	near met. site at Carreg Wen	yes	no		no	14	Tuesday	48	2			5.18
1130	CR1130	CR	2008.01.30 09:00	2008.01.30 05:30	2008.01.30 02:00	2008.01.30 09:00	2008	1	30	09:00	2008.01.30	2008.08026	2008.079861	0							0	None	input	near met. site at Carreg Wen	no	no		no	7	Wednesday	48	3
1131	CR1131	CR	2008.01.30 16:00	2008.01.30 12:30	2008.01.30 09:00	2008.01.30 16:00	2008	1	30	16:00	2008.01.30	2008.081057	2008.080658	0							0	None	input	near met. site at Carreg Wen	no	no		no	14	Wednesday	48	4
1132	CR1132	CR	2008.01.30 23:00	2008.01.30 20:07	2008.01.30 16:00	2008.01.30 23:00	2008	1	30	23:00	2008.01.30	2008.081853	2008.081526	0.57142857	-0.243038	18					4	None	input	near met. site at Carreg Wen	yes	no		no	21	Wednesday	48	5			18
1133	CR1133	CR	2008.01.31 06:00	2008.01.31 03:53	2008.01.30 23:00	2008.01.31 06:00	2008	1	31	06:00	2008.01.31	2008.08265	2008.08241	1.28571429	0.10914447	15					9	None	input	near met. site at Carreg Wen	yes	no		no	7	Wednesday	48	6			15
1134	CR1134	CR	2008.01.31 13:00	2008.01.31 07:10	2008.01.31 06:00	2008.01.31 13:00	2008	1	31	13:00	2008.01.31	2008.083447	2008.082783	1.28571429	0.10914447	10.8					9	None	input	near met. site at Carreg Wen	yes	no		no	7	Thursday	48	7			10.8
1135	CR1135	CR	2008.01.31 20:00	2008.01.31 17:30	2008.01.31 13:00	2008.01.31 20:00	2008	1	31	20:00	2008.01.31	2008.084244	2008.08396	0.07142857	-1.146128						0.5	None	input	near met. site at Carreg Wen	no	no		no	7	Thursday	48	8
1136	CR1136	CR	2008.02.01 03:00	2008.01.31 23:30	2008.01.31 20:00	2008.02.01 03:00	2008	2	1	03:00	2008.02.01	2008.085041	2008.084643	0							0	None	input	near met. site at Carreg Wen	no	no		no	14	Thursday	48	9
1137	CR1137	CR	2008.02.01 10:00	2008.02.01 09:30	2008.02.01 03:00	2008.02.01 10:00	2008	2	1	10:00	2008.02.01	2008.085838	2008.085781	0.21428571	-0.6690068	125					1.5	None	input	near met. site at Carreg Wen	yes	no		yes	21	Friday	48	10			125
1138	CR1138	CR	2008.02.01 17:00	2008.02.01 11:10	2008.02.01 10:00	2008.02.01 17:00	2008	2	1	17:00	2008.02.01	2008.086635	2008.085971	0.21428571	-0.6690068						1.5	None	input	near met. site at Carreg Wen	no	no		no	7	Friday	48	11
1139	CR1139	CR	2008.02.02 00:00	2008.02.01 20:30	2008.02.01 17:00	2008.02.02 00:00	2008	2	2	00:00	2008.02.02	2008.087432	2008.087033	0		1.71					0	None	input	near met. site at Carreg Wen	yes	no		no	14	Friday	48	12			1.71
1140	CR1140	CR	2008.02.02 07:00	2008.02.02 03:30	2008.02.02 00:00	2008.02.02 07:00	2008	2	2	07:00	2008.02.02	2008.088229	2008.08783	0							0	None	input	near met. site at Carreg Wen	no	no		no	7	Saturday	48	13
1141	CR1141	CR	2008.02.02 14:00	2008.02.02 10:30	2008.02.02 07:00	2008.02.02 14:00	2008	2	2	14:00	2008.02.02	2008.089026	2008.088627	0							0	None	input	near met. site at Carreg Wen	no	no		no	14	Saturday	48	14
1142	CR1142	CR	2008.02.02 21:00	2008.02.02 19:55	2008.02.02 14:00	2008.02.02 21:00	2008	2	2	21:00	2008.02.02	2008.089822	2008.0897	0.5	-0.30103	43.5					3.5	None	input	near met. site at Carreg Wen	yes	no		yes	21	Saturday	48	15			43.5
1143	CR1143	CR	2008.02.03 04:00	2008.02.02 22:47	2008.02.02 21:00	2008.02.03 04:00	2008	2	3	04:00	2008.02.03	2008.090619	2008.090026	0.5	-0.30103	12.5					3.5	None	input	near met. site at Carreg Wen	yes	no		no	7	Saturday	48	16			12.5
1144	CR1144	CR	2008.02.03 11:00	2008.02.03 07:30	2008.02.03 04:00	2008.02.03 11:00	2008	2	3	11:00	2008.02.03	2008.091416	2008.091018	0							0	None	input	near met. site at Carreg Wen	no	no		no	7	Sunday	48	17
1145	CR1145	CR	2008.02.03 18:00	2008.02.03 15:20	2008.02.03 11:00	2008.02.03 18:00	2008	2	3	18:00	2008.02.03	2008.092213	2008.09191	0.42857143	-0.3679768	10.7					3	None	input	near met. site at Carreg Wen	yes	no		no	14	Sunday	48	18			10.7
1146	CR1146	CR	2008.02.04 01:00	2008.02.03 22:06	2008.02.03 18:00	2008.02.04 01:00	2008	2	4	01:00	2008.02.04	2008.09301	2008.09268	0.35714286	-0.447158	0.97					2.5	None	input	near met. site at Carreg Wen	yes	no		no	7	Sunday	48	19			0.97
1147	CR1147	CR	2008.02.04 08:00	2008.02.04 04:30	2008.02.04 01:00	2008.02.04 08:00	2008	2	4	08:00	2008.02.04	2008.093807	2008.093409	0							0	None	input	near met. site at Carreg Wen	no	no		no	7	Monday	48	20
1148	CR1148	CR	2008.02.04 15:00	2008.02.04 11:40	2008.02.04 08:00	2008.02.04 15:00	2008	2	4	15:00	2008.02.04	2008.094604	2008.094226	1.21428571	0.08432089	11					8.5	None	input	near met. site at Carreg Wen	yes	no		no	14	Monday	48	21			11
1149	CR1149	CR	2008.02.04 22:00	2008.02.04 20:50	2008.02.04 15:00	2008.02.04 22:00	2008	2	4	22:00	2008.02.04	2008.095401	2008.095268	0.21428571	-0.6690068						1.5	None	input	near met. site at Carreg Wen	no	no		no	7	Monday	48	22
1150	CR1150	CR	2008.02.05 05:00	2008.02.05 00:07	2008.02.04 22:00	2008.02.05 05:00	2008	2	5	05:00	2008.02.05	2008.096198	2008.095643	1.14285714	0.05799195	3.39					8	None	input	near met. site at Carreg Wen	yes	no		no	14	Monday	48	23			3.39
1151	CR1151	CR	2008.02.05 12:00	2008.02.05 11:30	2008.02.05 05:00	2008.02.05 12:00	2008	2	5	12:00	2008.02.05	2008.096995	2008.096938	0.21428571	-0.6690068						1.5	None	input	near met. site at Carreg Wen	no	no		no	7	Tuesday	48	24
1152	CR1152	CR	2008.02.05 19:00	2008.02.05 13:48	2008.02.05 12:00	2008.02.05 19:00	2008	2	5	19:00	2008.02.05	2008.097791	2008.0972	0.71428571	-0.146128	5.81					5	None	input	near met. site at Carreg Wen	yes	no		no	14	Tuesday	49	1			5.81
1153	CR1153	CR	2008.02.06 02:00	2008.02.05 21:30	2008.02.05 19:00	2008.02.06 02:00	2008	2	6	02:00	2008.02.06	2008.098588	2008.098076	1.07142857	0.02996322	13.4					7.5	None	input	near met. site at Carreg Wen	yes	no		no	7	Tuesday	49	2			13.4
1154	CR1154	CR	2008.02.06 09:00	2008.02.06 02:30	2008.02.06 02:00	2008.02.06 09:00	2008	2	6	09:00	2008.02.06	2008.099385	2008.098645	0.07142857	-1.146128	10.8					0.5	None	input	near met. site at Carreg Wen	yes	no		no	7	Wednesday	49	3			10.8
1155	CR1155	CR	2008.02.06 16:00	2008.02.06 12:30	2008.02.06 09:00	2008.02.06 16:00	2008	2	6	16:00	2008.02.06	2008.100182	2008.099784	0							0	None	input	near met. site at Carreg Wen	no	no		no	7	Wednesday	49	4
1156	CR1156	CR	2008.02.06 23:00	2008.02.06 19:30	2008.02.06 16:00	2008.02.06 23:00	2008	2	6	23:00	2008.02.06	2008.100979	2008.100581	0							0	None	input	near met. site at Carreg Wen	no	no		no	14	Wednesday	49	5
1157	CR1157	CR	2008.02.07 06:00	2008.02.07 02:30	2008.02.06 23:00	2008.02.07 06:00	2008	2	7	06:00	2008.02.07	2008.101776	2008.101378	0							0	None	input	near met. site at Carreg Wen	no	no		no	21	Wednesday	49	6
1158	CR1158	CR	2008.02.07 13:00	2008.02.07 07:30	2008.02.07 06:00	2008.02.07 13:00	2008	2	7	13:00	2008.02.07	2008.102573	2008.101947	0.07142857	-1.146128	17					0.5	None	input	near met. site at Carreg Wen	yes	no		no	28	Thursday	49	7			17
1159	CR1159	CR	2008.02.07 20:00	2008.02.07 16:10	2008.02.07 13:00	2008.02.07 20:00	2008	2	7	20:00	2008.02.07	2008.10337	2008.102933	0.21428571	-0.6690068	2.18					1.5	None	input	near met. site at Carreg Wen	yes	no		no	7	Thursday	49	8			2.18
1160	CR1160	CR	2008.02.08 03:00	2008.02.07 23:30	2008.02.07 20:00	2008.02.08 03:00	2008	2	8	03:00	2008.02.08	2008.104167	2008.103768	0							0	None	input	near met. site at Carreg Wen	no	no		no	7	Thursday	49	9
1161	CR1161	CR	2008.02.08 10:00	2008.02.08 06:30	2008.02.08 03:00	2008.02.08 10:00	2008	2	8	10:00	2008.02.08	2008.104964	2008.104565	0							0	None	input	near met. site at Carreg Wen	no	no		no	14	Friday	49	10
1162	CR1162	CR	2008.02.08 17:00	2008.02.08 13:30	2008.02.08 10:00	2008.02.08 17:00	2008	2	8	17:00	2008.02.08	2008.105761	2008.105362	0							0	None	input	near met. site at Carreg Wen	no	no		no	21	Friday	49	11
1163	CR1163	CR	2008.02.09 00:00	2008.02.08 20:30	2008.02.08 17:00	2008.02.09 00:00	2008	2	9	00:00	2008.02.09	2008.106557	2008.106159	0							0	None	input	near met. site at Carreg Wen	no	no		no	28	Friday	49	12
1164	CR1164	CR	2008.02.09 07:00	2008.02.09 03:30	2008.02.09 00:00	2008.02.09 07:00	2008	2	9	07:00	2008.02.09	2008.107354	2008.106956	0							0	None	input	near met. site at Carreg Wen	no	no		no	35	Saturday	49	13
1165	CR1165	CR	2008.02.09 14:00	2008.02.09 10:30	2008.02.09 07:00	2008.02.09 14:00	2008	2	9	14:00	2008.02.09	2008.108151	2008.107753	0							0	None	input	near met. site at Carreg Wen	no	no		no	42	Saturday	49	14
1166	CR1166	CR	2008.02.09 21:00	2008.02.09 17:30	2008.02.09 14:00	2008.02.09 21:00	2008	2	9	21:00	2008.02.09	2008.108948	2008.10855	0							0	None	input	near met. site at Carreg Wen	no	no		no	49	Saturday	49	15
1167	CR1167	CR	2008.02.10 04:00	2008.02.10 00:30	2008.02.09 21:00	2008.02.10 04:00	2008	2	10	04:00	2008.02.10	2008.109745	2008.109347	0							0	None	input	near met. site at Carreg Wen	no	no		no	56	Saturday	49	16
1168	CR1168	CR	2008.02.10 11:00	2008.02.10 10:30	2008.02.10 04:00	2008.02.10 11:00	2008	2	10	11:00	2008.02.10	2008.110542	2008.110485	0.5	-0.30103						3.5	None	input	near met. site at Carreg Wen	no	no		no	63	Sunday	49	17
1169	CR1169	CR	2008.02.10 18:00	2008.02.10 14:30	2008.02.10 11:00	2008.02.10 18:00	2008	2	10	18:00	2008.02.10	2008.111339	2008.11094	0							0	None	input	near met. site at Carreg Wen	no	no		no	70	Sunday	49	18
1170	CR1170	CR	2008.02.11 01:00	2008.02.10 21:30	2008.02.10 18:00	2008.02.11 01:00	2008	2	11	01:00	2008.02.11	2008.112136	2008.111737	0							0	None	input	near met. site at Carreg Wen	no	no		no	77	Sunday	49	19
1171	CR1171	CR	2008.02.11 08:00	2008.02.11 04:30	2008.02.11 01:00	2008.02.11 08:00	2008	2	11	08:00	2008.02.11	2008.112933	2008.112534	0							0	None	input	near met. site at Carreg Wen	no	no		no	84	Monday	49	20
1172	CR1172	CR	2008.02.11 15:00	2008.02.11 11:30	2008.02.11 08:00	2008.02.11 15:00	2008	2	11	15:00	2008.02.11	2008.11373	2008.113331	0							0	None	input	near met. site at Carreg Wen	no	no		no	91	Monday	49	21
1173	CR1173	CR	2008.02.11 22:00	2008.02.11 18:30	2008.02.11 15:00	2008.02.11 22:00	2008	2	11	22:00	2008.02.11	2008.114526	2008.114128	0							0	None	input	near met. site at Carreg Wen	no	no		no	98	Monday	49	22
1174	CR1174	CR	2008.02.12 05:00	2008.02.12 01:30	2008.02.11 22:00	2008.02.12 05:00	2008	2	12	05:00	2008.02.12	2008.115323	2008.114925	0							0	None	input	near met. site at Carreg Wen	no	no		no	105	Monday	49	23
1175	CR1175	CR	2008.02.12 12:00	2008.02.12 08:30	2008.02.12 05:00	2008.02.12 12:00	2008	2	12	12:00	2008.02.12	2008.11612	2008.115722	0		27.9					0	None	input	near met. site at Carreg Wen	yes	no		yes	112	Tuesday	49	24			27.9
1176	CR1176	CR	2008.02.12 19:00	2008.02.12 15:30	2008.02.12 12:00	2008.02.12 19:00	2008	2	12	19:00	2008.02.12	2008.116917	2008.116519	0							0	None	input	near met. site at Carreg Wen	no	no		no	7	Tuesday	50	1
1177	CR1177	CR	2008.02.13 02:00	2008.02.12 22:30	2008.02.12 19:00	2008.02.13 02:00	2008	2	13	02:00	2008.02.13	2008.117714	2008.117316	0							0	None	input	near met. site at Carreg Wen	no	no		no	14	Tuesday	50	2
1178	CR1178	CR	2008.02.13 09:00	2008.02.13 05:30	2008.02.13 02:00	2008.02.13 09:00	2008	2	13	09:00	2008.02.13	2008.118511	2008.118113	0							0	None	input	near met. site at Carreg Wen	no	no		no	21	Wednesday	50	3
1179	CR1179	CR	2008.02.13 16:00	2008.02.13 12:30	2008.02.13 09:00	2008.02.13 16:00	2008	2	13	16:00	2008.02.13	2008.119308	2008.118909	0							0	None	input	near met. site at Carreg Wen	no	no		no	28	Wednesday	50	4
1180	CR1180	CR	2008.02.13 23:00	2008.02.13 19:30	2008.02.13 16:00	2008.02.13 23:00	2008	2	13	23:00	2008.02.13	2008.120105	2008.119706	0							0	None	input	near met. site at Carreg Wen	no	no		no	35	Wednesday	50	5
1181	CR1181	CR	2008.02.14 06:00	2008.02.14 02:30	2008.02.13 23:00	2008.02.14 06:00	2008	2	14	06:00	2008.02.14	2008.120902	2008.120503	0							0	None	input	near met. site at Carreg Wen	no	no		no	42	Wednesday	50	6
1182	CR1182	CR	2008.02.14 13:00	2008.02.14 09:30	2008.02.14 06:00	2008.02.14 13:00	2008	2	14	13:00	2008.02.14	2008.121699	2008.1213	0.07142857	-1.146128						0.5	None	input	near met. site at Carreg Wen	no	no		no	49	Thursday	50	7
1183	CR1183	CR	2008.02.14 20:00	2008.02.14 16:30	2008.02.14 13:00	2008.02.14 20:00	2008	2	14	20:00	2008.02.14	2008.122495	2008.122097	0							0	None	input	near met. site at Carreg Wen	no	no		no	56	Thursday	50	8
1184	CR1184	CR	2008.02.15 03:00	2008.02.14 23:30	2008.02.14 20:00	2008.02.15 03:00	2008	2	15	03:00	2008.02.15	2008.123292	2008.122894	0							0	None	input	near met. site at Carreg Wen	no	no		no	63	Thursday	50	9
1185	CR1185	CR	2008.02.15 10:00	2008.02.15 06:30	2008.02.15 03:00	2008.02.15 10:00	2008	2	15	10:00	2008.02.15	2008.124089	2008.123691	0							0	None	input	near met. site at Carreg Wen	no	no		no	70	Friday	50	10
1186	CR1186	CR	2008.02.15 17:00	2008.02.15 13:30	2008.02.15 10:00	2008.02.15 17:00	2008	2	15	17:00	2008.02.15	2008.124886	2008.124488	0							0	None	input	near met. site at Carreg Wen	no	no		no	77	Friday	50	11
1187	CR1187	CR	2008.02.16 00:00	2008.02.15 20:30	2008.02.15 17:00	2008.02.16 00:00	2008	2	16	00:00	2008.02.16	2008.125683	2008.125285	0							0	None	input	near met. site at Carreg Wen	no	no		no	84	Friday	50	12
1188	CR1188	CR	2008.02.16 07:00	2008.02.16 03:30	2008.02.16 00:00	2008.02.16 07:00	2008	2	16	07:00	2008.02.16	2008.12648	2008.126082	0							0	None	input	near met. site at Carreg Wen	no	no		no	91	Saturday	50	13
1189	CR1189	CR	2008.02.16 14:00	2008.02.16 10:30	2008.02.16 07:00	2008.02.16 14:00	2008	2	16	14:00	2008.02.16	2008.127277	2008.126878	0							0	None	input	near met. site at Carreg Wen	no	no		no	98	Saturday	50	14
1190	CR1190	CR	2008.02.16 21:00	2008.02.16 17:30	2008.02.16 14:00	2008.02.16 21:00	2008	2	16	21:00	2008.02.16	2008.128074	2008.127675	0							0	None	input	near met. site at Carreg Wen	no	no		no	105	Saturday	50	15
1191	CR1191	CR	2008.02.17 04:00	2008.02.17 00:30	2008.02.16 21:00	2008.02.17 04:00	2008	2	17	04:00	2008.02.17	2008.128871	2008.128472	0							0	None	input	near met. site at Carreg Wen	no	no		no	112	Saturday	50	16
1192	CR1192	CR	2008.02.17 11:00	2008.02.17 07:30	2008.02.17 04:00	2008.02.17 11:00	2008	2	17	11:00	2008.02.17	2008.129668	2008.129269	0							0	None	input	near met. site at Carreg Wen	no	no		no	119	Sunday	50	17
1193	CR1193	CR	2008.02.17 18:00	2008.02.17 14:30	2008.02.17 11:00	2008.02.17 18:00	2008	2	17	18:00	2008.02.17	2008.130465	2008.130066	0							0	None	input	near met. site at Carreg Wen	no	no		no	126	Sunday	50	18
1194	CR1194	CR	2008.02.18 01:00	2008.02.17 21:30	2008.02.17 18:00	2008.02.18 01:00	2008	2	18	01:00	2008.02.18	2008.131261	2008.130863	0							0	None	input	near met. site at Carreg Wen	no	no		no	133	Sunday	50	19
1195	CR1195	CR	2008.02.18 08:00	2008.02.18 04:30	2008.02.18 01:00	2008.02.18 08:00	2008	2	18	08:00	2008.02.18	2008.132058	2008.13166	0							0	None	input	near met. site at Carreg Wen	no	no		no	140	Monday	50	20
1196	CR1196	CR	2008.02.18 15:00	2008.02.18 11:30	2008.02.18 08:00	2008.02.18 15:00	2008	2	18	15:00	2008.02.18	2008.132855	2008.132457	0							0	None	input	near met. site at Carreg Wen	no	no		no	147	Monday	50	21
1197	CR1197	CR	2008.02.18 22:00	2008.02.18 18:30	2008.02.18 15:00	2008.02.18 22:00	2008	2	18	22:00	2008.02.18	2008.133652	2008.133254	0							0	None	input	near met. site at Carreg Wen	no	no		no	154	Monday	50	22
1198	CR1198	CR	2008.02.19 05:00	2008.02.19 01:30	2008.02.18 22:00	2008.02.19 05:00	2008	2	19	05:00	2008.02.19	2008.134449	2008.134051	0							0	None	input	near met. site at Carreg Wen	no	no		no	161	Monday	50	23
1199	CR1199	CR	2008.02.19 12:00	2008.02.19 08:30	2008.02.19 05:00	2008.02.19 12:00	2008	2	19	12:00	2008.02.19	2008.135246	2008.134847	0							0	None	input	near met. site at Carreg Wen	no	no		no	168	Tuesday	50	24
1200	CR1200	CR	2008.02.19 19:00	2008.02.19 15:30	2008.02.19 12:00	2008.02.19 19:00	2008	2	19	19:00	2008.02.19	2008.136043	2008.135644	0		0.66					0	None	input	near met. site at Carreg Wen	yes	no		no	175	Tuesday	51	1			0.66
1201	CR1201	CR	2008.02.20 02:00	2008.02.19 22:30	2008.02.19 19:00	2008.02.20 02:00	2008	2	20	02:00	2008.02.20	2008.13684	2008.136441	0		0.12					0	None	input	near met. site at Carreg Wen	yes	no		no	7	Tuesday	51	2			0.12
1202	CR1202	CR	2008.02.20 09:00	2008.02.20 05:30	2008.02.20 02:00	2008.02.20 09:00	2008	2	20	09:00	2008.02.20	2008.137637	2008.137238	0							0	None	input	near met. site at Carreg Wen	no	no		no	7	Wednesday	51	3
1203	CR1203	CR	2008.02.20 16:00	2008.02.20 12:30	2008.02.20 09:00	2008.02.20 16:00	2008	2	20	16:00	2008.02.20	2008.138434	2008.138035	0							0	None	input	near met. site at Carreg Wen	no	no		no	14	Wednesday	51	4
1204	CR1204	CR	2008.02.20 23:00	2008.02.20 21:30	2008.02.20 16:00	2008.02.20 23:00	2008	2	20	23:00	2008.02.20	2008.13923	2008.13906	0.14285714	-0.845098						1	None	input	near met. site at Carreg Wen	no	no		no	21	Wednesday	51	5
1205	CR1205	CR	2008.02.21 06:00	2008.02.21 05:15	2008.02.20 23:00	2008.02.21 06:00	2008	2	21	06:00	2008.02.21	2008.140027	2008.139942	0.28571429	-0.544068	16.4					2	None	input	near met. site at Carreg Wen	yes	no		no	28	Wednesday	51	6			16.4
1206	CR1206	CR	2008.02.21 13:00	2008.02.21 08:52	2008.02.21 06:00	2008.02.21 13:00	2008	2	21	13:00	2008.02.21	2008.140824	2008.140355	1.71428571	0.23408321	4.4					12	None	input	near met. site at Carreg Wen	yes	no		no	7	Thursday	51	7			4.4
1207	CR1207	CR	2008.02.21 20:00	2008.02.21 14:50	2008.02.21 13:00	2008.02.21 20:00	2008	2	21	20:00	2008.02.21	2008.141621	2008.141033	0.21428571	-0.6690068	13.5					1.5	None	input	near met. site at Carreg Wen	yes	no		no	7	Thursday	51	8			13.5
1208	CR1208	CR	2008.02.22 03:00	2008.02.22 01:06	2008.02.21 20:00	2008.02.22 03:00	2008	2	22	03:00	2008.02.22	2008.142418	2008.142202	0.35714286	-0.447158	8.26					2.5	None	input	near met. site at Carreg Wen	yes	no		no	7	Thursday	51	9			8.26
1209	CR1209	CR	2008.02.22 10:00	2008.02.22 06:34	2008.02.22 03:00	2008.02.22 10:00	2008	2	22	10:00	2008.02.22	2008.143215	2008.142825	0.92857143	-0.0321847	4.3					6.5	None	input	near met. site at Carreg Wen	yes	no		no	7	Friday	51	10			4.3
1210	CR1210	CR	2008.02.22 17:00	2008.02.22 10:30	2008.02.22 10:00	2008.02.22 17:00	2008	2	22	17:00	2008.02.22	2008.144012	2008.143272	0.07142857	-1.146128	5.77					0.5	None	input	near met. site at Carreg Wen	yes	no		no	7	Friday	51	11			5.77
1211	CR1211	CR	2008.02.23 00:00	2008.02.22 20:30	2008.02.22 17:00	2008.02.23 00:00	2008	2	23	00:00	2008.02.23	2008.144809	2008.14441	0							0	None	input	near met. site at Carreg Wen	no	no		no	7	Friday	51	12
1212	CR1212	CR	2008.02.23 07:00	2008.02.23 04:52	2008.02.23 00:00	2008.02.23 07:00	2008	2	23	07:00	2008.02.23	2008.145606	2008.145364	0.57142857	-0.243038	8.97					4	None	input	near met. site at Carreg Wen	yes	no		no	14	Saturday	51	13			8.97
1213	CR1213	CR	2008.02.23 14:00	2008.02.23 09:42	2008.02.23 07:00	2008.02.23 14:00	2008	2	23	14:00	2008.02.23	2008.146403	2008.145913	0.35714286	-0.447158	1.25					2.5	None	input	near met. site at Carreg Wen	yes	no		no	7	Saturday	51	14			1.25
1214	CR1214	CR	2008.02.23 21:00	2008.02.23 16:30	2008.02.23 14:00	2008.02.23 21:00	2008	2	23	21:00	2008.02.23	2008.1472	2008.146687	0.28571429	-0.544068	2.36					2	None	input	near met. site at Carreg Wen	yes	no		no	7	Saturday	51	15			2.36
1215	CR1215	CR	2008.02.24 04:00	2008.02.24 00:30	2008.02.23 21:00	2008.02.24 04:00	2008	2	24	04:00	2008.02.24	2008.147996	2008.147598	0							0	None	input	near met. site at Carreg Wen	no	no		no	7	Saturday	51	16
1216	CR1216	CR	2008.02.24 11:00	2008.02.24 08:24	2008.02.24 04:00	2008.02.24 11:00	2008	2	24	11:00	2008.02.24	2008.148793	2008.148497	0.71428571	-0.146128	0.82					5	None	input	near met. site at Carreg Wen	yes	no		no	14	Sunday	51	17			0.82
1217	CR1217	CR	2008.02.24 18:00	2008.02.24 11:30	2008.02.24 11:00	2008.02.24 18:00	2008	2	24	18:00	2008.02.24	2008.14959	2008.14885	0.07142857	-1.146128	3.3					0.5	None	input	near met. site at Carreg Wen	yes	no		no	7	Sunday	51	18			3.3
1218	CR1218	CR	2008.02.25 01:00	2008.02.24 21:30	2008.02.24 18:00	2008.02.25 01:00	2008	2	25	01:00	2008.02.25	2008.150387	2008.149989	0							0	None	input	near met. site at Carreg Wen	no	no		no	7	Sunday	51	19
1219	CR1219	CR	2008.02.25 08:00	2008.02.25 04:30	2008.02.25 01:00	2008.02.25 08:00	2008	2	25	08:00	2008.02.25	2008.151184	2008.150786	0							0	None	input	near met. site at Carreg Wen	no	no		no	14	Monday	51	20
1220	CR1220	CR	2008.02.25 15:00	2008.02.25 11:30	2008.02.25 08:00	2008.02.25 15:00	2008	2	25	15:00	2008.02.25	2008.151981	2008.151582	0							0	None	input	near met. site at Carreg Wen	no	no		no	21	Monday	51	21
1221	CR1221	CR	2008.02.25 22:00	2008.02.25 19:55	2008.02.25 15:00	2008.02.25 22:00	2008	2	25	22:00	2008.02.25	2008.152778	2008.152541	3.21428571	0.50708448	0.72					22.5	None	input	near met. site at Carreg Wen	yes	no		no	28	Monday	51	22			0.72
1222	CR1222	CR	2008.02.26 05:00	2008.02.25 23:44	2008.02.25 22:00	2008.02.26 05:00	2008	2	26	05:00	2008.02.26	2008.153575	2008.152976	2.35714286	0.3723859	6.76					16.5	None	input	near met. site at Carreg Wen	yes	no		no	7	Monday	51	23			6.76
1223	CR1223	CR	2008.02.26 12:00	2008.02.26 08:30	2008.02.26 05:00	2008.02.26 12:00	2008	2	26	12:00	2008.02.26	2008.154372	2008.153973	0.07142857	-1.146128						0.5	None	input	near met. site at Carreg Wen	no	no		no	7	Tuesday	51	24
1224	CR1224	CR	2008.02.26 19:00	2008.02.26 15:30	2008.02.26 12:00	2008.02.26 19:00	2008	2	26	19:00	2008.02.26	2008.155169	2008.15477	0							0	None	input	near met. site at Carreg Wen	no	no		no	14	Tuesday	52	1
1225	CR1225	CR	2008.02.27 02:00	2008.02.26 22:30	2008.02.26 19:00	2008.02.27 02:00	2008	2	27	02:00	2008.02.27	2008.155965	2008.155567	0							0	None	input	near met. site at Carreg Wen	no	no		no	21	Tuesday	52	2
1226	CR1226	CR	2008.02.27 09:00	2008.02.27 05:30	2008.02.27 02:00	2008.02.27 09:00	2008	2	27	09:00	2008.02.27	2008.156762	2008.156364	0							0	None	input	near met. site at Carreg Wen	no	no		no	28	Wednesday	52	3
1227	CR1227	CR	2008.02.27 16:00	2008.02.27 12:30	2008.02.27 09:00	2008.02.27 16:00	2008	2	27	16:00	2008.02.27	2008.157559	2008.157161	0							0	None	input	near met. site at Carreg Wen	no	no		no	35	Wednesday	52	4
1228	CR1228	CR	2008.02.27 23:00	2008.02.27 19:30	2008.02.27 16:00	2008.02.27 23:00	2008	2	27	23:00	2008.02.27	2008.158356	2008.157958	0							0	None	input	near met. site at Carreg Wen	no	no		no	42	Wednesday	52	5
1229	CR1229	CR	2008.02.28 06:00	2008.02.28 02:30	2008.02.27 23:00	2008.02.28 06:00	2008	2	28	06:00	2008.02.28	2008.159153	2008.158755	0							0	None	input	near met. site at Carreg Wen	no	no		no	49	Wednesday	52	6
1230	CR1230	CR	2008.02.28 13:00	2008.02.28 09:30	2008.02.28 06:00	2008.02.28 13:00	2008	2	28	13:00	2008.02.28	2008.15995	2008.159552	0							0	None	input	near met. site at Carreg Wen	no	no		no	56	Thursday	52	7
1231	CR1231	CR	2008.02.28 20:00	2008.02.28 16:30	2008.02.28 13:00	2008.02.28 20:00	2008	2	28	20:00	2008.02.28	2008.160747	2008.160348	0							0	None	input	near met. site at Carreg Wen	no	no		no	63	Thursday	52	8
1232	CR1232	CR	2008.02.29 03:00	2008.02.28 23:30	2008.02.28 20:00	2008.02.29 03:00	2008	2	29	03:00	2008.02.29	2008.161544	2008.161145	0							0	None	input	near met. site at Carreg Wen	no	no		no	70	Thursday	52	9
1233	CR1233	CR	2008.02.29 10:00	2008.02.29 09:12	2008.02.29 03:00	2008.02.29 10:00	2008	2	29	10:00	2008.02.29	2008.162341	2008.162251	0.5	-0.30103	5.86					3.5	None	input	near met. site at Carreg Wen	yes	no		no	77	Friday	52	10			5.86
1234	CR1234	CR	2008.02.29 17:00	2008.02.29 12:28	2008.02.29 10:00	2008.02.29 17:00	2008	2	29	17:00	2008.02.29	2008.163138	2008.162622	4.71428571	0.6734159	3.18					33	None	input	near met. site at Carreg Wen	yes	no		no	7	Friday	52	11			3.18
1235	CR1235	CR	2008.03.01 00:00	2008.02.29 21:00	2008.02.29 17:00	2008.03.01 00:00	2008	3	1	00:00	2008.03.01	2008.163934	2008.163593	0.85714286	-0.0669468	30					6	None	input	near met. site at Carreg Wen	yes	no		yes	7	Friday	52	12			30
1236	CR1236	CR	2008.03.01 07:00	2008.03.01 00:30	2008.03.01 00:00	2008.03.01 07:00	2008	3	1	07:00	2008.03.01	2008.164731	2008.163991	0.28571429	-0.544068	14.8					2	None	input	near met. site at Carreg Wen	yes	no		no	7	Saturday	52	13			14.8
1237	CR1237	CR	2008.03.01 14:00	2008.03.01 10:30	2008.03.01 07:00	2008.03.01 14:00	2008	3	1	14:00	2008.03.01	2008.165528	2008.16513	0							0	None	input	near met. site at Carreg Wen	no	no		no	7	Saturday	52	14
1238	CR1238	CR	2008.03.01 21:00	2008.03.01 17:24	2008.03.01 14:00	2008.03.01 21:00	2008	3	1	21:00	2008.03.01	2008.166325	2008.165916	1.57142857	0.19629465	16.7					11	None	input	near met. site at Carreg Wen	yes	no		no	14	Saturday	52	15			16.7
1239	CR1239	CR	2008.03.02 04:00	2008.03.01 22:13	2008.03.01 21:00	2008.03.02 04:00	2008	3	2	04:00	2008.03.02	2008.167122	2008.166464	1.28571429	0.10914447	4.7					9	None	input	near met. site at Carreg Wen	yes	no		no	7	Saturday	52	16			4.7
1240	CR1240	CR	2008.03.02 11:00	2008.03.02 07:30	2008.03.02 04:00	2008.03.02 11:00	2008	3	2	11:00	2008.03.02	2008.167919	2008.167521	0							0	None	input	near met. site at Carreg Wen	no	no		no	7	Sunday	52	17
1241	CR1241	CR	2008.03.02 18:00	2008.03.02 14:30	2008.03.02 11:00	2008.03.02 18:00	2008	3	2	18:00	2008.03.02	2008.168716	2008.168317	0.07142857	-1.146128						0.5	None	input	near met. site at Carreg Wen	no	no		no	14	Sunday	52	18
1242	CR1242	CR	2008.03.03 01:00	2008.03.02 20:54	2008.03.02 18:00	2008.03.03 01:00	2008	3	3	01:00	2008.03.03	2008.169513	2008.169046	0.35714286	-0.447158	29.8					2.5	None	input	near met. site at Carreg Wen	yes	no		yes	21	Sunday	52	19			29.8
1243	CR1243	CR	2008.03.03 08:00	2008.03.03 04:30	2008.03.03 01:00	2008.03.03 08:00	2008	3	3	08:00	2008.03.03	2008.17031	2008.169911	0							0	None	input	near met. site at Carreg Wen	no	no		no	7	Monday	52	20
1244	CR1244	CR	2008.03.03 15:00	2008.03.03 11:30	2008.03.03 08:00	2008.03.03 15:00	2008	3	3	15:00	2008.03.03	2008.171107	2008.170708	0.21428571	-0.6690068	22.2					1.5	None	input	near met. site at Carreg Wen	yes	no		no	14	Monday	52	21			22.2
1245	CR1245	CR	2008.03.03 22:00	2008.03.03 18:30	2008.03.03 15:00	2008.03.03 22:00	2008	3	3	22:00	2008.03.03	2008.171904	2008.171505	0							0	None	input	near met. site at Carreg Wen	no	no		no	7	Monday	52	22
1246	CR1246	CR	2008.03.04 05:00	2008.03.04 01:30	2008.03.03 22:00	2008.03.04 05:00	2008	3	4	05:00	2008.03.04	2008.1727	2008.172302	0							0	None	input	near met. site at Carreg Wen	no	no		no	14	Monday	52	23
1247	CR1247	CR	2008.03.04 12:00	2008.03.04 09:06	2008.03.04 05:00	2008.03.04 12:00	2008	3	4	12:00	2008.03.04	2008.173497	2008.173167	0.71428571	-0.146128	10.5					5	None	input	near met. site at Carreg Wen	yes	no		no	21	Tuesday	52	24			10.5
1248	CR1248	CR	2008.03.04 19:00	2008.03.04 15:30	2008.03.04 12:00	2008.03.04 19:00	2008	3	4	19:00	2008.03.04	2008.174294	2008.173896	0		11.5					0	None	input	near met. site at Carreg Wen	yes	no		no	7	Tuesday	53	1			11.5
1249	CR1249	CR	2008.03.05 02:00	2008.03.04 22:30	2008.03.04 19:00	2008.03.05 02:00	2008	3	5	02:00	2008.03.05	2008.175091	2008.174693	0							0	None	input	near met. site at Carreg Wen	no	no		no	7	Tuesday	53	2
1250	CR1250	CR	2008.03.05 09:00	2008.03.05 07:30	2008.03.05 02:00	2008.03.05 09:00	2008	3	5	09:00	2008.03.05	2008.175888	2008.175717	0.14285714	-0.845098	11.2					1	None	input	near met. site at Carreg Wen	yes	no		no	14	Wednesday	53	3			11.2
1251	CR1251	CR	2008.03.05 16:00	2008.03.05 12:30	2008.03.05 09:00	2008.03.05 16:00	2008	3	5	16:00	2008.03.05	2008.176685	2008.176286	0							0	None	input	near met. site at Carreg Wen	no	no		no	7	Wednesday	53	4
1252	CR1252	CR	2008.03.05 23:00	2008.03.05 22:30	2008.03.05 16:00	2008.03.05 23:00	2008	3	5	23:00	2008.03.05	2008.177482	2008.177425	0.07142857	-1.146128						0.5	None	input	near met. site at Carreg Wen	no	no		no	14	Wednesday	53	5
1253	CR1253	CR	2008.03.06 06:00	2008.03.06 02:30	2008.03.05 23:00	2008.03.06 06:00	2008	3	6	06:00	2008.03.06	2008.178279	2008.17788	0							0	None	input	near met. site at Carreg Wen	no	no		no	21	Wednesday	53	6
1254	CR1254	CR	2008.03.06 13:00	2008.03.06 09:30	2008.03.06 06:00	2008.03.06 13:00	2008	3	6	13:00	2008.03.06	2008.179076	2008.178677	0							0	None	input	near met. site at Carreg Wen	no	no		no	28	Thursday	53	7
1255	CR1255	CR	2008.03.06 20:00	2008.03.06 16:30	2008.03.06 13:00	2008.03.06 20:00	2008	3	6	20:00	2008.03.06	2008.179873	2008.179474	0.07142857	-1.146128	21.5					0.5	None	input	near met. site at Carreg Wen	yes	no		no	35	Thursday	53	8			21.5
1256	CR1256	CR	2008.03.07 03:00	2008.03.07 01:16	2008.03.06 20:00	2008.03.07 03:00	2008	3	7	03:00	2008.03.07	2008.180669	2008.180473	1.28571429	0.10914447	1.22					9	None	input	near met. site at Carreg Wen	yes	no		no	7	Thursday	53	9			1.22
1257	CR1257	CR	2008.03.07 10:00	2008.03.07 06:21	2008.03.07 03:00	2008.03.07 10:00	2008	3	7	10:00	2008.03.07	2008.181466	2008.181052	0.5	-0.30103	4.64					3.5	None	input	near met. site at Carreg Wen	yes	no		no	7	Friday	53	10			4.64
1258	CR1258	CR	2008.03.07 17:00	2008.03.07 13:30	2008.03.07 10:00	2008.03.07 17:00	2008	3	7	17:00	2008.03.07	2008.182263	2008.181865	0		0.64					0	None	input	near met. site at Carreg Wen	yes	no		no	7	Friday	53	11			0.64
1259	CR1259	CR	2008.03.08 00:00	2008.03.07 20:30	2008.03.07 17:00	2008.03.08 00:00	2008	3	8	00:00	2008.03.08	2008.18306	2008.182662	0							0	None	input	near met. site at Carreg Wen	no	no		no	7	Friday	53	12
1260	CR1260	CR	2008.03.08 07:00	2008.03.08 04:12	2008.03.08 00:00	2008.03.08 07:00	2008	3	8	07:00	2008.03.08	2008.183857	2008.183538	1.42857143	0.15490196	13.2					10	None	input	near met. site at Carreg Wen	yes	no		no	14	Saturday	53	13			13.2
1261	CR1261	CR	2008.03.08 14:00	2008.03.08 10:56	2008.03.08 07:00	2008.03.08 14:00	2008	3	8	14:00	2008.03.08	2008.184654	2008.184305	1.14285714	0.05799195						8	None	input	near met. site at Carreg Wen	yes	no		no	7	Saturday	53	14
1262	CR1262	CR	2008.03.08 21:00	2008.03.08 15:00	2008.03.08 14:00	2008.03.08 21:00	2008	3	8	21:00	2008.03.08	2008.185451	2008.184768	1	0	3.43					7	None	input	near met. site at Carreg Wen	yes	no		no	7	Saturday	53	15			3.43
1263	CR1263	CR	2008.03.09 04:00	2008.03.09 00:55	2008.03.08 21:00	2008.03.09 04:00	2008	3	9	04:00	2008.03.09	2008.186248	2008.185898	1	0	20.8					7	None	input	near met. site at Carreg Wen	yes	no		no	7	Saturday	53	16			20.8
1264	CR1264	CR	2008.03.09 11:00	2008.03.09 08:30	2008.03.09 04:00	2008.03.09 11:00	2008	3	9	11:00	2008.03.09	2008.187045	2008.18676	0.07142857	-1.146128	8.56					0.5	None	input	near met. site at Carreg Wen	yes	no		no	7	Sunday	53	17			8.56
1265	CR1265	CR	2008.03.09 18:00	2008.03.09 14:50	2008.03.09 11:00	2008.03.09 18:00	2008	3	9	18:00	2008.03.09	2008.187842	2008.187481	0.21428571	-0.6690068	10.2					1.5	None	input	near met. site at Carreg Wen	yes	no		no	7	Sunday	53	18			10.2
1266	CR1266	CR	2008.03.10 01:00	2008.03.09 21:30	2008.03.09 18:00	2008.03.10 01:00	2008	3	10	01:00	2008.03.10	2008.188638	2008.18824	0		14.2					0	None	input	near met. site at Carreg Wen	yes	no		no	7	Sunday	53	19			14.2
1267	CR1267	CR	2008.03.10 08:00	2008.03.10 04:15	2008.03.10 01:00	2008.03.10 08:00	2008	3	10	08:00	2008.03.10	2008.189435	2008.18901	2.71428571	0.43365556	2.02					19	None	input	near met. site at Carreg Wen	yes	no		no	7	Monday	53	20			2.02
1268	CR1268	CR	2008.03.10 15:00	2008.03.10 11:10	2008.03.10 08:00	2008.03.10 15:00	2008	3	10	15:00	2008.03.10	2008.190232	2008.189796	0.64285714	-0.1918855	12.5					4.5	None	input	near met. site at Carreg Wen	yes	no		no	7	Monday	53	21			12.5
1269	CR1269	CR	2008.03.10 22:00	2008.03.10 19:10	2008.03.10 15:00	2008.03.10 22:00	2008	3	10	22:00	2008.03.10	2008.191029	2008.190707	1.28571429	0.10914447	8.21					9	None	input	near met. site at Carreg Wen	yes	no		no	7	Monday	53	22			8.21
1270	CR1270	CR	2008.03.11 05:00	2008.03.11 01:30	2008.03.10 22:00	2008.03.11 05:00	2008	3	11	05:00	2008.03.11	2008.191826	2008.191428	0		11.4					0	None	input	near met. site at Carreg Wen	yes	no		no	7	Monday	53	23			11.4
1271	CR1271	CR	2008.03.11 12:00	2008.03.11 08:30	2008.03.11 05:00	2008.03.11 12:00	2008	3	11	12:00	2008.03.11	2008.192623	2008.192225	0.92857143	-0.0321847	15.6					6.5	None	input	near met. site at Carreg Wen	yes	no		no	7	Tuesday	53	24			15.6
1272	CR1272	CR	2008.03.11 19:00	2008.03.11 15:30	2008.03.11 12:00	2008.03.11 19:00	2008	3	11	19:00	2008.03.11	2008.19342	2008.193021	0							0	None	input	near met. site at Carreg Wen	no	no		no	7	Tuesday	54	1
1273	CR1273	CR	2008.03.12 02:00	2008.03.11 19:30	2008.03.11 19:00	2008.03.12 02:00	2008	3	12	02:00	2008.03.12	2008.194217	2008.193477	0.21428571	-0.6690068	63.7	-6.034	-22.906			1.5	None	input	near met. site at Carreg Wen	yes	yes	no	yes	14	Tuesday	54	2	-6.034	-22.906	63.7
1274	CR1274	CR	2008.03.12 09:00	2008.03.12 04:30	2008.03.12 02:00	2008.03.12 09:00	2008	3	12	09:00	2008.03.12	2008.195014	2008.194501	0.07142857	-1.146128						0.5	None	input	near met. site at Carreg Wen	no	no		no	7	Wednesday	54	3
1275	CR1275	CR	2008.03.12 16:00	2008.03.12 12:30	2008.03.12 09:00	2008.03.12 16:00	2008	3	12	16:00	2008.03.12	2008.195811	2008.195412	0							0	None	input	near met. site at Carreg Wen	no	no		no	14	Wednesday	54	4
1276	CR1276	CR	2008.03.12 23:00	2008.03.12 17:30	2008.03.12 16:00	2008.03.12 23:00	2008	3	12	23:00	2008.03.12	2008.196608	2008.195981	0.07142857	-1.146128	270					0.5	None	input	near met. site at Carreg Wen	yes	no		yes	21	Wednesday	54	5			270
1277	CR1277	CR	2008.03.13 06:00	2008.03.13 00:30	2008.03.12 23:00	2008.03.13 06:00	2008	3	13	06:00	2008.03.13	2008.197404	2008.196778	0.14285714	-0.845098	68	-5.412	-18.159			1	None	input	near met. site at Carreg Wen	yes	yes	no	no	7	Wednesday	54	6	-5.412	-18.159	68
1278	CR1278	CR	2008.03.13 13:00	2008.03.13 09:30	2008.03.13 06:00	2008.03.13 13:00	2008	3	13	13:00	2008.03.13	2008.198201	2008.197803	0							0	None	input	near met. site at Carreg Wen	no	no		no	7	Thursday	54	7
1279	CR1279	CR	2008.03.13 20:00	2008.03.13 16:30	2008.03.13 13:00	2008.03.13 20:00	2008	3	13	20:00	2008.03.13	2008.198998	2008.1986	0							0	None	input	near met. site at Carreg Wen	no	no		no	14	Thursday	54	8
1280	CR1280	CR	2008.03.14 03:00	2008.03.13 21:00	2008.03.13 20:00	2008.03.14 03:00	2008	3	14	03:00	2008.03.14	2008.199795	2008.199112	0.28571429	-0.544068	27.2	-6.296	-37.608			2	None	input	near met. site at Carreg Wen	yes	yes	no	yes	21	Thursday	54	9	-6.296	-37.608	27.2
1281	CR1281	CR	2008.03.14 10:00	2008.03.14 06:30	2008.03.14 03:00	2008.03.14 10:00	2008	3	14	10:00	2008.03.14	2008.200592	2008.200194	0							0	None	input	near met. site at Carreg Wen	no	no		no	7	Friday	54	10
1282	CR1282	CR	2008.03.14 17:00	2008.03.14 13:30	2008.03.14 10:00	2008.03.14 17:00	2008	3	14	17:00	2008.03.14	2008.201389	2008.20099	0							0	None	input	near met. site at Carreg Wen	no	no		no	14	Friday	54	11
1283	CR1283	CR	2008.03.15 00:00	2008.03.14 20:30	2008.03.14 17:00	2008.03.15 00:00	2008	3	15	00:00	2008.03.15	2008.202186	2008.201787	0							0	None	input	near met. site at Carreg Wen	no	no		no	21	Friday	54	12
1284	CR1284	CR	2008.03.15 07:00	2008.03.15 01:10	2008.03.15 00:00	2008.03.15 07:00	2008	3	15	07:00	2008.03.15	2008.202983	2008.202319	0.21428571	-0.6690068	9.19	-3.185	-9.706			1.5	None	input	near met. site at Carreg Wen	yes	yes	no	no	28	Saturday	54	13	-3.185	-9.706	9.19
1285	CR1285	CR	2008.03.15 14:00	2008.03.15 12:20	2008.03.15 07:00	2008.03.15 14:00	2008	3	15	14:00	2008.03.15	2008.20378	2008.20359	0.42857143	-0.3679768	3.21	-3.33	-12.519			3	None	input	near met. site at Carreg Wen	yes	yes	no	no	7	Saturday	54	14	-3.33	-12.519	3.21
1286	CR1286	CR	2008.03.15 21:00	2008.03.15 17:27	2008.03.15 14:00	2008.03.15 21:00	2008	3	15	21:00	2008.03.15	2008.204577	2008.204173	3.42857143	0.5351132	0.18	-9.14	-54.875			24	None	input	near met. site at Carreg Wen	yes	yes	no	no	7	Saturday	54	15	-9.14	-54.875	0.18
1287	CR1287	CR	2008.03.16 04:00	2008.03.15 23:15	2008.03.15 21:00	2008.03.16 04:00	2008	3	16	04:00	2008.03.16	2008.205373	2008.204834	1.21428571	0.08432089	0.48	-10.358	-69.156			8.5	None	input	near met. site at Carreg Wen	yes	yes	no	no	7	Saturday	54	16	-10.358	-69.156	0.48
1288	CR1288	CR	2008.03.16 11:00	2008.03.16 04:50	2008.03.16 04:00	2008.03.16 11:00	2008	3	16	11:00	2008.03.16	2008.20617	2008.205468	0.21428571	-0.6690068	0.72	-10.458	-71.099			1.5	None	input	near met. site at Carreg Wen	yes	yes	no	no	7	Sunday	54	17	-10.458	-71.099	0.72
1289	CR1289	CR	2008.03.16 18:00	2008.03.16 14:30	2008.03.16 11:00	2008.03.16 18:00	2008	3	16	18:00	2008.03.16	2008.206967	2008.206569	0							0	None	input	near met. site at Carreg Wen	no	no		no	7	Sunday	54	18
1290	CR1290	CR	2008.03.17 01:00	2008.03.16 21:30	2008.03.16 18:00	2008.03.17 01:00	2008	3	17	01:00	2008.03.17	2008.207764	2008.207366	0							0	None	input	near met. site at Carreg Wen	no	no		no	14	Sunday	54	19
1291	CR1291	CR	2008.03.17 08:00	2008.03.17 04:30	2008.03.17 01:00	2008.03.17 08:00	2008	3	17	08:00	2008.03.17	2008.208561	2008.208163	0							0	None	input	near met. site at Carreg Wen	no	no		no	21	Monday	54	20
1292	CR1292	CR	2008.03.17 15:00	2008.03.17 11:30	2008.03.17 08:00	2008.03.17 15:00	2008	3	17	15:00	2008.03.17	2008.209358	2008.20896	0							0	None	input	near met. site at Carreg Wen	no	no		no	28	Monday	54	21
1293	CR1293	CR	2008.03.17 22:00	2008.03.17 18:30	2008.03.17 15:00	2008.03.17 22:00	2008	3	17	22:00	2008.03.17	2008.210155	2008.209756	0							0	None	input	near met. site at Carreg Wen	no	no		no	35	Monday	54	22
1294	CR1294	CR	2008.03.18 05:00	2008.03.18 01:30	2008.03.17 22:00	2008.03.18 05:00	2008	3	18	05:00	2008.03.18	2008.210952	2008.210553	0							0	None	input	near met. site at Carreg Wen	no	no		no	42	Monday	54	23
1295	CR1295	CR	2008.03.18 12:00	2008.03.18 08:30	2008.03.18 05:00	2008.03.18 12:00	2008	3	18	12:00	2008.03.18	2008.211749	2008.21135	0							0	None	input	near met. site at Carreg Wen	no	no		no	49	Tuesday	54	24
1296	CR1296	CR	2008.03.18 19:00	2008.03.18 15:30	2008.03.18 12:00	2008.03.18 19:00	2008	3	18	19:00	2008.03.18	2008.212546	2008.212147	0							0	None	input	near met. site at Carreg Wen	no	no		no	56	Tuesday	55	1
1297	CR1297	CR	2008.03.19 02:00	2008.03.18 22:30	2008.03.18 19:00	2008.03.19 02:00	2008	3	19	02:00	2008.03.19	2008.213342	2008.212944	0							0	None	input	near met. site at Carreg Wen	no	no		no	63	Tuesday	55	2
1298	CR1298	CR	2008.03.19 09:00	2008.03.19 07:30	2008.03.19 02:00	2008.03.19 09:00	2008	3	19	09:00	2008.03.19	2008.214139	2008.213969	0.07142857	-1.146128						0.5	None	input	near met. site at Carreg Wen	no	no		no	70	Wednesday	55	3
1299	CR1299	CR	2008.03.19 16:00	2008.03.19 12:30	2008.03.19 09:00	2008.03.19 16:00	2008	3	19	16:00	2008.03.19	2008.214936	2008.214538	0							0	None	input	near met. site at Carreg Wen	no	no		no	77	Wednesday	55	4
1300	CR1300	CR	2008.03.19 23:00	2008.03.19 19:30	2008.03.19 16:00	2008.03.19 23:00	2008	3	19	23:00	2008.03.19	2008.215733	2008.215335	0							0	None	input	near met. site at Carreg Wen	no	no		no	84	Wednesday	55	5
1301	CR1301	CR	2008.03.20 06:00	2008.03.20 02:30	2008.03.19 23:00	2008.03.20 06:00	2008	3	20	06:00	2008.03.20	2008.21653	2008.216132	0							0	None	input	near met. site at Carreg Wen	no	no		no	91	Wednesday	55	6
1302	CR1302	CR	2008.03.20 13:00	2008.03.20 11:30	2008.03.20 06:00	2008.03.20 13:00	2008	3	20	13:00	2008.03.20	2008.217327	2008.217156	0.5	-0.30103	16.7	-3.862	-14.454			3.5	None	input	near met. site at Carreg Wen	yes	yes	no	yes	98	Thursday	55	7	-3.862	-14.454	16.7
1303	CR1303	CR	2008.03.20 20:00	2008.03.20 16:25	2008.03.20 13:00	2008.03.20 20:00	2008	3	20	20:00	2008.03.20	2008.218124	2008.217716	3.42857143	0.5351132	3.91	-3.34	-14.665			24	None	input	near met. site at Carreg Wen	yes	yes	no	no	7	Thursday	55	8	-3.34	-14.665	3.91
1304	CR1304	CR	2008.03.21 03:00	2008.03.20 21:42	2008.03.20 20:00	2008.03.21 03:00	2008	3	21	03:00	2008.03.21	2008.218921	2008.218317	0.71428571	-0.146128						5	None	input	near met. site at Carreg Wen	no	no		no	7	Thursday	55	9
1305	CR1305	CR	2008.03.21 10:00	2008.03.21 06:45	2008.03.21 03:00	2008.03.21 10:00	2008	3	21	10:00	2008.03.21	2008.219718	2008.219348	0.28571429	-0.544068	36.6	-4.605	-14.071			2	None	input	near met. site at Carreg Wen	yes	yes	no	yes	14	Friday	55	10	-4.605	-14.071	36.6
1306	CR1306	CR	2008.03.21 17:00	2008.03.21 13:30	2008.03.21 10:00	2008.03.21 17:00	2008	3	21	17:00	2008.03.21	2008.220515	2008.220116	0.85714286	-0.0669468	33.5	-5.743	-24.235			6	None	input	near met. site at Carreg Wen	yes	yes	no	yes	7	Friday	55	11	-5.743	-24.235	33.5
1307	CR1307	CR	2008.03.22 00:00	2008.03.21 20:30	2008.03.21 17:00	2008.03.22 00:00	2008	3	22	00:00	2008.03.22	2008.221312	2008.220913	0		9.84	-9.894	-57.208			0	None	input	near met. site at Carreg Wen	yes	yes	no	no	7	Friday	55	12	-9.894	-57.208	9.84
1308	CR1308	CR	2008.03.22 07:00	2008.03.22 03:30	2008.03.22 00:00	2008.03.22 07:00	2008	3	22	07:00	2008.03.22	2008.222108	2008.22171	0							0	None	input	near met. site at Carreg Wen	no	no		no	7	Saturday	55	13
1309	CR1309	CR	2008.03.22 14:00	2008.03.22 08:47	2008.03.22 07:00	2008.03.22 14:00	2008	3	22	14:00	2008.03.22	2008.222905	2008.222312	0.5	-0.30103						3.5	None	input	near met. site at Carreg Wen	no	no		no	14	Saturday	55	14
1310	CR1310	CR	2008.03.22 21:00	2008.03.22 17:30	2008.03.22 14:00	2008.03.22 21:00	2008	3	22	21:00	2008.03.22	2008.223702	2008.223304	0		11.1					0	None	input	near met. site at Carreg Wen	yes	no		no	21	Saturday	55	15			11.1
1311	CR1311	CR	2008.03.23 04:00	2008.03.23 00:30	2008.03.22 21:00	2008.03.23 04:00	2008	3	23	04:00	2008.03.23	2008.224499	2008.224101	0							0	None	input	near met. site at Carreg Wen	no	no		no	7	Saturday	55	16
1312	CR1312	CR	2008.03.23 11:00	2008.03.23 10:26	2008.03.23 04:00	2008.03.23 11:00	2008	3	23	11:00	2008.03.23	2008.225296	2008.225233	1.35714286	0.13262557						9.5	None	input	near met. site at Carreg Wen	no	no		no	14	Sunday	55	17
1313	CR1313	CR	2008.03.23 18:00	2008.03.23 11:30	2008.03.23 11:00	2008.03.23 18:00	2008	3	23	18:00	2008.03.23	2008.226093	2008.225353	0.21428571	-0.6690068	10.5	-7.968	-44.755			1.5	None	input	near met. site at Carreg Wen	yes	yes	no	no	21	Sunday	55	18	-7.968	-44.755	10.5
1314	CR1314	CR	2008.03.24 01:00	2008.03.23 21:30	2008.03.23 18:00	2008.03.24 01:00	2008	3	24	01:00	2008.03.24	2008.22689	2008.226491	0							0	None	input	near met. site at Carreg Wen	no	no		no	7	Sunday	55	19
1315	CR1315	CR	2008.03.24 08:00	2008.03.24 07:30	2008.03.24 01:00	2008.03.24 08:00	2008	3	24	08:00	2008.03.24	2008.227687	2008.22763	0.21428571	-0.6690068						1.5	None	input	near met. site at Carreg Wen	no	no		no	14	Monday	55	20
1316	CR1316	CR	2008.03.24 15:00	2008.03.24 10:45	2008.03.24 08:00	2008.03.24 15:00	2008	3	24	15:00	2008.03.24	2008.228484	2008.228	0.28571429	-0.544068	6.8	-5.896	-26.337			2	None	input	near met. site at Carreg Wen	yes	yes	no	no	21	Monday	55	21	-5.896	-26.337	6.8
1317	CR1317	CR	2008.03.24 22:00	2008.03.24 15:30	2008.03.24 15:00	2008.03.24 22:00	2008	3	24	22:00	2008.03.24	2008.229281	2008.228541	0.07142857	-1.146128						0.5	None	input	near met. site at Carreg Wen	no	no		no	7	Monday	55	22
1318	CR1318	CR	2008.03.25 05:00	2008.03.25 01:30	2008.03.24 22:00	2008.03.25 05:00	2008	3	25	05:00	2008.03.25	2008.230077	2008.229679	0							0	None	input	near met. site at Carreg Wen	no	no		no	14	Monday	55	23
1319	CR1319	CR	2008.03.25 12:00	2008.03.25 08:30	2008.03.25 05:00	2008.03.25 12:00	2008	3	25	12:00	2008.03.25	2008.230874	2008.230476	0							0	None	input	near met. site at Carreg Wen	no	no		no	21	Tuesday	55	24
1320	CR1320	CR	2008.03.25 19:00	2008.03.25 17:10	2008.03.25 12:00	2008.03.25 19:00	2008	3	25	19:00	2008.03.25	2008.231671	2008.231463	0.21428571	-0.6690068	16.7	-4.028	-13.682			1.5	None	input	near met. site at Carreg Wen	yes	yes	no	no	28	Tuesday	56	1	-4.028	-13.682	16.7
1321	CR1321	CR	2008.03.26 02:00	2008.03.25 20:15	2008.03.25 19:00	2008.03.26 02:00	2008	3	26	02:00	2008.03.26	2008.232468	2008.231814	0.28571429	-0.544068	5.09	-4.809	-19.329			2	None	input	near met. site at Carreg Wen	yes	yes	no	no	7	Tuesday	56	2	-4.809	-19.329	5.09
1322	CR1322	CR	2008.03.26 09:00	2008.03.26 04:47	2008.03.26 02:00	2008.03.26 09:00	2008	3	26	09:00	2008.03.26	2008.233265	2008.232785	0.5	-0.30103		-4.948	-23.355			3.5	None	input	near met. site at Carreg Wen	yes	yes	no	no	7	Wednesday	56	3	-4.948	-23.355
1323	CR1323	CR	2008.03.26 16:00	2008.03.26 12:30	2008.03.26 09:00	2008.03.26 16:00	2008	3	26	16:00	2008.03.26	2008.234062	2008.233664	0							0	None	input	near met. site at Carreg Wen	no	no		no	7	Wednesday	56	4
1324	CR1324	CR	2008.03.26 23:00	2008.03.26 21:30	2008.03.26 16:00	2008.03.26 23:00	2008	3	26	23:00	2008.03.26	2008.234859	2008.234688	0.07142857	-1.146128	10.7					0.5	None	input	near met. site at Carreg Wen	yes	no		no	14	Wednesday	56	5			10.7
1325	CR1325	CR	2008.03.27 06:00	2008.03.27 02:30	2008.03.26 23:00	2008.03.27 06:00	2008	3	27	06:00	2008.03.27	2008.235656	2008.235257	0							0	None	input	near met. site at Carreg Wen	no	no		no	7	Wednesday	56	6
1326	CR1326	CR	2008.03.27 13:00	2008.03.27 07:42	2008.03.27 06:00	2008.03.27 13:00	2008	3	27	13:00	2008.03.27	2008.236453	2008.235849	0.71428571	-0.146128	3.62	-2.368	-9.42			5	None	input	near met. site at Carreg Wen	yes	yes	no	no	14	Thursday	56	7	-2.368	-9.42	3.62
1327	CR1327	CR	2008.03.27 20:00	2008.03.27 16:30	2008.03.27 13:00	2008.03.27 20:00	2008	3	27	20:00	2008.03.27	2008.23725	2008.236851	0							0	None	input	near met. site at Carreg Wen	no	no		no	7	Thursday	56	8
1328	CR1328	CR	2008.03.28 03:00	2008.03.28 01:42	2008.03.27 20:00	2008.03.28 03:00	2008	3	28	03:00	2008.03.28	2008.238046	2008.237899	0.35714286	-0.447158	1.25	-7.495	-42.064			2.5	None	input	near met. site at Carreg Wen	yes	yes	no	no	14	Thursday	56	9	-7.495	-42.064	1.25
1329	CR1329	CR	2008.03.28 10:00	2008.03.28 07:23	2008.03.28 03:00	2008.03.28 10:00	2008	3	28	10:00	2008.03.28	2008.238843	2008.238547	2.07142857	0.31626996	3.02	-5.046	-28.118			14.5	None	input	near met. site at Carreg Wen	yes	yes	no	no	7	Friday	56	10	-5.046	-28.118	3.02
1330	CR1330	CR	2008.03.28 17:00	2008.03.28 15:18	2008.03.28 10:00	2008.03.28 17:00	2008	3	28	17:00	2008.03.28	2008.23964	2008.239448	1.14285714	0.05799195	9.93	-8.429	-45.769			8	None	input	near met. site at Carreg Wen	yes	yes	no	no	7	Friday	56	11	-8.429	-45.769	9.93
1331	CR1331	CR	2008.03.29 00:00	2008.03.28 18:42	2008.03.28 17:00	2008.03.29 00:00	2008	3	29	00:00	2008.03.29	2008.240437	2008.239834	0.71428571	-0.146128	8.27	-9.362	-51.523			5	None	input	near met. site at Carreg Wen	yes	yes	no	no	7	Friday	56	12	-9.362	-51.523	8.27
1332	CR1332	CR	2008.03.29 07:00	2008.03.29 01:50	2008.03.29 00:00	2008.03.29 07:00	2008	3	29	07:00	2008.03.29	2008.241234	2008.240646	0.21428571	-0.6690068	13.4	-7.35	-34.828			1.5	None	input	near met. site at Carreg Wen	yes	yes	no	no	7	Saturday	56	13	-7.35	-34.828	13.4
1333	CR1333	CR	2008.03.29 14:00	2008.03.29 11:50	2008.03.29 07:00	2008.03.29 14:00	2008	3	29	14:00	2008.03.29	2008.242031	2008.241784	0.85714286	-0.0669468	8.87	-6.558	-33.32			6	None	input	near met. site at Carreg Wen	yes	yes	no	no	7	Saturday	56	14	-6.558	-33.32	8.87
1334	CR1334	CR	2008.03.29 21:00	2008.03.29 18:00	2008.03.29 14:00	2008.03.29 21:00	2008	3	29	21:00	2008.03.29	2008.242828	2008.242486	2.14285714	0.33099322	7.79	-11.512	-73.06			15	None	input	near met. site at Carreg Wen	yes	yes	no	no	7	Saturday	56	15	-11.512	-73.06	7.79
1335	CR1335	CR	2008.03.30 04:00	2008.03.29 21:51	2008.03.29 21:00	2008.03.30 04:00	2008	3	30	04:00	2008.03.30	2008.243625	2008.242925	1	0	5.04	-10.133	-63.498			7	None	input	near met. site at Carreg Wen	yes	yes	no	no	7	Saturday	56	16	-10.133	-63.498	5.04
1336	CR1336	CR	2008.03.30 11:00	2008.03.30 07:30	2008.03.30 04:00	2008.03.30 11:00	2008	3	30	11:00	2008.03.30	2008.244422	2008.244023	0							0	None	input	near met. site at Carreg Wen	no	no		no	7	Sunday	56	17
1337	CR1337	CR	2008.03.30 18:00	2008.03.30 12:10	2008.03.30 11:00	2008.03.30 18:00	2008	3	30	18:00	2008.03.30	2008.245219	2008.244555	0.42857143	-0.3679768		-7.546	-44.129			3	None	input	near met. site at Carreg Wen	yes	yes	no	no	14	Sunday	56	18	-7.546	-44.129
1338	CR1338	CR	2008.03.31 01:00	2008.03.30 20:00	2008.03.30 18:00	2008.03.31 01:00	2008	3	31	01:00	2008.03.31	2008.246016	2008.245446	0.14285714	-0.845098	9.58					1	None	input	near met. site at Carreg Wen	yes	no		no	7	Sunday	56	19			9.58
1339	CR1339	CR	2008.03.31 08:00	2008.03.31 04:30	2008.03.31 01:00	2008.03.31 08:00	2008	3	31	08:00	2008.03.31	2008.246812	2008.246414	0							0	None	input	near met. site at Carreg Wen	no	no		no	7	Monday	56	20
1340	CR1340	CR	2008.03.31 15:00	2008.03.31 11:30	2008.03.31 08:00	2008.03.31 15:00	2008	3	31	15:00	2008.03.31	2008.247609	2008.247211	0							0	None	input	near met. site at Carreg Wen	no	no		no	14	Monday	56	21
1341	CR1341	CR	2008.03.31 22:00	2008.03.31 18:30	2008.03.31 15:00	2008.03.31 22:00	2008	3	31	22:00	2008.03.31	2008.248406	2008.248008	0							0	None	input	near met. site at Carreg Wen	no	no		no	21	Monday	56	22
1342	CR1342	CR	2008.04.01 05:00	2008.04.01 01:20	2008.03.31 22:00	2008.04.01 05:00	2008	4	1	05:00	2008.04.01	2008.249203	2008.248786	1.71428571	0.23408321	5.05	-2.709	-13.232			12	None	input	near met. site at Carreg Wen	yes	yes	no	no	28	Monday	56	23	-2.709	-13.232	5.05
1343	CR1343	CR	2008.04.01 12:00	2008.04.01 08:30	2008.04.01 05:00	2008.04.01 12:00	2008	4	1	12:00	2008.04.01	2008.25	2008.249602	0							0	None	input	near met. site at Carreg Wen	no	no		no	7	Tuesday	56	24
1344	CR1344	CR	2008.04.01 19:00	2008.04.01 15:30	2008.04.01 12:00	2008.04.01 19:00	2008	4	1	19:00	2008.04.01	2008.250797	2008.250399	0							0	None	input	near met. site at Carreg Wen	no	no		no	14	Tuesday	57	1
1345	CR1345	CR	2008.04.02 02:00	2008.04.01 22:30	2008.04.01 19:00	2008.04.02 02:00	2008	4	2	02:00	2008.04.02	2008.251594	2008.251195	0							0	None	input	near met. site at Carreg Wen	no	no		no	21	Tuesday	57	2
1346	CR1346	CR	2008.04.02 09:00	2008.04.02 05:30	2008.04.02 02:00	2008.04.02 09:00	2008	4	2	09:00	2008.04.02	2008.252391	2008.251992	0.78571429	-0.1047354	17.7	-2.508	-5.911			5.5	None	input	near met. site at Carreg Wen	yes	yes	no	no	28	Wednesday	57	3	-2.508	-5.911	17.7
1347	CR1347	CR	2008.04.02 16:00	2008.04.02 10:10	2008.04.02 09:00	2008.04.02 16:00	2008	4	2	16:00	2008.04.02	2008.253188	2008.252524	0.21428571	-0.6690068	5.29	-0.961	-1.563			1.5	None	input	near met. site at Carreg Wen	yes	yes	no	no	7	Wednesday	57	4	-0.961	-1.563	5.29
1348	CR1348	CR	2008.04.02 23:00	2008.04.02 19:30	2008.04.02 16:00	2008.04.02 23:00	2008	4	2	23:00	2008.04.02	2008.253985	2008.253586	0							0	None	input	near met. site at Carreg Wen	no	no		no	7	Wednesday	57	5
1349	CR1349	CR	2008.04.03 06:00	2008.04.03 02:30	2008.04.02 23:00	2008.04.03 06:00	2008	4	3	06:00	2008.04.03	2008.254781	2008.254383	0							0	None	input	near met. site at Carreg Wen	no	no		no	14	Wednesday	57	6
1350	CR1350	CR	2008.04.03 13:00	2008.04.03 09:30	2008.04.03 06:00	2008.04.03 13:00	2008	4	3	13:00	2008.04.03	2008.255578	2008.25518	0							0	None	input	near met. site at Carreg Wen	no	no		no	21	Thursday	57	7
1351	CR1351	CR	2008.04.03 20:00	2008.04.03 16:30	2008.04.03 13:00	2008.04.03 20:00	2008	4	3	20:00	2008.04.03	2008.256375	2008.255977	0							0	None	input	near met. site at Carreg Wen	no	no		no	28	Thursday	57	8
1352	CR1352	CR	2008.04.04 03:00	2008.04.03 23:30	2008.04.03 20:00	2008.04.04 03:00	2008	4	4	03:00	2008.04.04	2008.257172	2008.256774	0							0	None	input	near met. site at Carreg Wen	no	no		no	35	Thursday	57	9
1353	CR1353	CR	2008.04.04 10:00	2008.04.04 06:30	2008.04.04 03:00	2008.04.04 10:00	2008	4	4	10:00	2008.04.04	2008.257969	2008.257571	0							0	None	input	near met. site at Carreg Wen	no	no		no	42	Friday	57	10
1354	CR1354	CR	2008.04.04 17:00	2008.04.04 13:30	2008.04.04 10:00	2008.04.04 17:00	2008	4	4	17:00	2008.04.04	2008.258766	2008.258368	0							0	None	input	near met. site at Carreg Wen	no	no		no	49	Friday	57	11
1355	CR1355	CR	2008.04.05 00:00	2008.04.04 21:40	2008.04.04 17:00	2008.04.05 00:00	2008	4	5	00:00	2008.04.05	2008.259563	2008.259297	0.42857143	-0.3679768	7.25	-2.695	-8.068			3	None	input	near met. site at Carreg Wen	yes	yes	no	no	56	Friday	57	12	-2.695	-8.068	7.25
1356	CR1356	CR	2008.04.05 07:00	2008.04.05 06:30	2008.04.05 00:00	2008.04.05 07:00	2008	4	5	07:00	2008.04.05	2008.26036	2008.260303	0.07142857	-1.146128						0.5	None	input	near met. site at Carreg Wen	no	no		no	7	Saturday	57	13
1357	CR1357	CR	2008.04.05 14:00	2008.04.05 10:30	2008.04.05 07:00	2008.04.05 14:00	2008	4	5	14:00	2008.04.05	2008.261157	2008.260758	0							0	None	input	near met. site at Carreg Wen	no	no		no	14	Saturday	57	14
1358	CR1358	CR	2008.04.05 21:00	2008.04.05 17:30	2008.04.05 14:00	2008.04.05 21:00	2008	4	5	21:00	2008.04.05	2008.261954	2008.261555	0							0	None	input	near met. site at Carreg Wen	no	no		no	21	Saturday	57	15
1359	CR1359	CR	2008.04.06 04:00	2008.04.06 00:30	2008.04.05 21:00	2008.04.06 04:00	2008	4	6	04:00	2008.04.06	2008.262751	2008.262352	0							0	None	input	near met. site at Carreg Wen	no	no		no	28	Saturday	57	16
1360	CR1360	CR	2008.04.06 11:00	2008.04.06 08:36	2008.04.06 04:00	2008.04.06 11:00	2008	4	6	11:00	2008.04.06	2008.263547	2008.263275	0.64285714	-0.1918855	4.37	-7.567	-39.93			4.5	None	input	near met. site at Carreg Wen	yes	yes	no	no	35	Sunday	57	17	-7.567	-39.93	4.37
1361	CR1361	CR	2008.04.06 18:00	2008.04.06 16:30	2008.04.06 11:00	2008.04.06 18:00	2008	4	6	18:00	2008.04.06	2008.264344	2008.264174	0.07142857	-1.146128	3.73	-7.253	-37.472			0.5	None	input	near met. site at Carreg Wen	yes	yes	no	no	7	Sunday	57	18	-7.253	-37.472	3.73
1362	CR1362	CR	2008.04.07 01:00	2008.04.06 21:30	2008.04.06 18:00	2008.04.07 01:00	2008	4	7	01:00	2008.04.07	2008.265141	2008.264743	0							0	None	input	near met. site at Carreg Wen	no	no		no	7	Sunday	57	19
1363	CR1363	CR	2008.04.07 08:00	2008.04.07 07:10	2008.04.07 01:00	2008.04.07 08:00	2008	4	7	08:00	2008.04.07	2008.265938	2008.265843	0.21428571	-0.6690068						1.5	None	input	near met. site at Carreg Wen	no	no		no	14	Monday	57	20
1364	CR1364	CR	2008.04.07 15:00	2008.04.07 14:15	2008.04.07 08:00	2008.04.07 15:00	2008	4	7	15:00	2008.04.07	2008.266735	2008.26665	0.28571429	-0.544068	7.32	-6.933	-36.922			2	None	input	near met. site at Carreg Wen	yes	yes	no	no	21	Monday	57	21	-6.933	-36.922	7.32
1365	CR1365	CR	2008.04.07 22:00	2008.04.07 18:30	2008.04.07 15:00	2008.04.07 22:00	2008	4	7	22:00	2008.04.07	2008.267532	2008.267133	0		3.23	-9.985	-61.549			0	None	input	near met. site at Carreg Wen	yes	yes	no	no	7	Monday	57	22	-9.985	-61.549	3.23
1366	CR1366	CR	2008.04.08 05:00	2008.04.08 01:30	2008.04.07 22:00	2008.04.08 05:00	2008	4	8	05:00	2008.04.08	2008.268329	2008.26793	0							0	None	input	near met. site at Carreg Wen	no	no		no	7	Monday	57	23
1367	CR1367	CR	2008.04.08 12:00	2008.04.08 07:30	2008.04.08 05:00	2008.04.08 12:00	2008	4	8	12:00	2008.04.08	2008.269126	2008.268613	0.42857143	-0.3679768	7.31	-7.47	-39.772			3	None	input	near met. site at Carreg Wen	yes	yes	no	no	14	Tuesday	57	24	-7.47	-39.772	7.31
1368	CR1368	CR	2008.04.08 19:00	2008.04.08 15:30	2008.04.08 12:00	2008.04.08 19:00	2008	4	8	19:00	2008.04.08	2008.269923	2008.269524	0							0	None	input	near met. site at Carreg Wen	no	no		no	7	Tuesday	58	1
1369	CR1369	CR	2008.04.09 02:00	2008.04.08 22:30	2008.04.08 19:00	2008.04.09 02:00	2008	4	9	02:00	2008.04.09	2008.27072	2008.270321	0							0	None	input	near met. site at Carreg Wen	no	no		no	14	Tuesday	58	2
1370	CR1370	CR	2008.04.09 09:00	2008.04.09 06:30	2008.04.09 02:00	2008.04.09 09:00	2008	4	9	09:00	2008.04.09	2008.271516	2008.271232	0.07142857	-1.146128						0.5	None	input	near met. site at Carreg Wen	no	no		no	21	Wednesday	58	3
1371	CR1371	CR	2008.04.09 16:00	2008.04.09 11:00	2008.04.09 09:00	2008.04.09 16:00	2008	4	9	16:00	2008.04.09	2008.272313	2008.271744	0.14285714	-0.845098	1.66	-7.89	-47.555			1	None	input	near met. site at Carreg Wen	yes	yes	no	no	28	Wednesday	58	4	-7.89	-47.555	1.66
1372	CR1372	CR	2008.04.09 23:00	2008.04.09 22:00	2008.04.09 16:00	2008.04.09 23:00	2008	4	9	23:00	2008.04.09	2008.27311	2008.272996	0.14285714	-0.845098						1	None	input	near met. site at Carreg Wen	no	no		no	7	Wednesday	58	5
1373	CR1373	CR	2008.04.10 06:00	2008.04.10 02:15	2008.04.09 23:00	2008.04.10 06:00	2008	4	10	06:00	2008.04.10	2008.273907	2008.27348	0.28571429	-0.544068	4.76	-6.348	-31.745			2	None	input	near met. site at Carreg Wen	yes	yes	no	no	14	Wednesday	58	6	-6.348	-31.745	4.76
1374	CR1374	CR	2008.04.10 13:00	2008.04.10 11:40	2008.04.10 06:00	2008.04.10 13:00	2008	4	10	13:00	2008.04.10	2008.274704	2008.274552	0.42857143	-0.3679768	0.78	-7.666	-44.294			3	None	input	near met. site at Carreg Wen	yes	yes	no	no	7	Thursday	58	7	-7.666	-44.294	0.78
1375	CR1375	CR	2008.04.10 20:00	2008.04.10 14:30	2008.04.10 13:00	2008.04.10 20:00	2008	4	10	20:00	2008.04.10	2008.275501	2008.274875	0.07142857	-1.146128	0.72	-7.689	-46.867			0.5	None	input	near met. site at Carreg Wen	yes	yes	no	no	7	Thursday	58	8	-7.689	-46.867	0.72
1376	CR1376	CR	2008.04.11 03:00	2008.04.10 20:30	2008.04.10 20:00	2008.04.11 03:00	2008	4	11	03:00	2008.04.11	2008.276298	2008.275558	0.07142857	-1.146128						0.5	None	input	near met. site at Carreg Wen	no	no		no	7	Thursday	58	9
1377	CR1377	CR	2008.04.11 10:00	2008.04.11 08:06	2008.04.11 03:00	2008.04.11 10:00	2008	4	11	10:00	2008.04.11	2008.277095	2008.276878	1.07142857	0.02996322	10.6	-9.76	-58.132			7.5	None	input	near met. site at Carreg Wen	yes	yes	no	no	14	Friday	58	10	-9.76	-58.132	10.6
1378	CR1378	CR	2008.04.11 17:00	2008.04.11 11:06	2008.04.11 10:00	2008.04.11 17:00	2008	4	11	17:00	2008.04.11	2008.277892	2008.27722	0.35714286	-0.447158	3.8	-9.489	-56.684			2.5	None	input	near met. site at Carreg Wen	yes	yes	no	no	7	Friday	58	11	-9.489	-56.684	3.8
1379	CR1379	CR	2008.04.12 00:00	2008.04.11 19:40	2008.04.11 17:00	2008.04.12 00:00	2008	4	12	00:00	2008.04.12	2008.278689	2008.278195	0.42857143	-0.3679768	5.23	-9.862	-57.46			3	None	input	near met. site at Carreg Wen	yes	yes	no	no	7	Friday	58	12	-9.862	-57.46	5.23
1380	CR1380	CR	2008.04.12 07:00	2008.04.12 04:38	2008.04.12 00:00	2008.04.12 07:00	2008	4	12	07:00	2008.04.12	2008.279485	2008.279216	1.07142857	0.02996322	4.3	-9.943	-58.859			7.5	None	input	near met. site at Carreg Wen	yes	yes	no	no	7	Saturday	58	13	-9.943	-58.859	4.3
1381	CR1381	CR	2008.04.12 14:00	2008.04.12 08:02	2008.04.12 07:00	2008.04.12 14:00	2008	4	12	14:00	2008.04.12	2008.280282	2008.279604	0.78571429	-0.1047354	2.03	-8.703	-52.424			5.5	None	input	near met. site at Carreg Wen	yes	yes	no	no	7	Saturday	58	14	-8.703	-52.424	2.03
1382	CR1382	CR	2008.04.12 21:00	2008.04.12 17:30	2008.04.12 14:00	2008.04.12 21:00	2008	4	12	21:00	2008.04.12	2008.281079	2008.280681	0							0	None	input	near met. site at Carreg Wen	no	no		no	7	Saturday	58	15
1383	CR1383	CR	2008.04.13 04:00	2008.04.13 01:00	2008.04.12 21:00	2008.04.13 04:00	2008	4	13	04:00	2008.04.13	2008.281876	2008.281535	0.85714286	-0.0669468	5.03	-8.967	-55.144			6	None	input	near met. site at Carreg Wen	yes	yes	no	no	14	Saturday	58	16	-8.967	-55.144	5.03
1384	CR1384	CR	2008.04.13 11:00	2008.04.13 07:10	2008.04.13 04:00	2008.04.13 11:00	2008	4	13	11:00	2008.04.13	2008.282673	2008.282237	0.21428571	-0.6690068	1.68	-10.754	-71.788			1.5	None	input	near met. site at Carreg Wen	yes	yes	no	no	7	Sunday	58	17	-10.754	-71.788	1.68
1385	CR1385	CR	2008.04.13 18:00	2008.04.13 11:45	2008.04.13 11:00	2008.04.13 18:00	2008	4	13	18:00	2008.04.13	2008.28347	2008.282758	0.28571429	-0.544068	0.4	-14.173	-100.327			2	None	input	near met. site at Carreg Wen	yes	yes	no	no	7	Sunday	58	18	-14.173	-100.327	0.4
1386	CR1386	CR	2008.04.14 01:00	2008.04.13 21:30	2008.04.13 18:00	2008.04.14 01:00	2008	4	14	01:00	2008.04.14	2008.284267	2008.283868	0							0	None	input	near met. site at Carreg Wen	no	no		no	7	Sunday	58	19
1387	CR1387	CR	2008.04.14 08:00	2008.04.14 05:54	2008.04.14 01:00	2008.04.14 08:00	2008	4	14	08:00	2008.04.14	2008.285064	2008.284825	0.35714286	-0.447158	2.01	-8.482	-52.032			2.5	None	input	near met. site at Carreg Wen	yes	yes	no	no	14	Monday	58	20	-8.482	-52.032	2.01
1388	CR1388	CR	2008.04.14 15:00	2008.04.14 11:30	2008.04.14 08:00	2008.04.14 15:00	2008	4	14	15:00	2008.04.14	2008.285861	2008.285462	0							0	None	input	near met. site at Carreg Wen	no	no		no	7	Monday	58	21
1389	CR1389	CR	2008.04.14 22:00	2008.04.14 18:30	2008.04.14 15:00	2008.04.14 22:00	2008	4	14	22:00	2008.04.14	2008.286658	2008.286259	0							0	None	input	near met. site at Carreg Wen	no	no		no	14	Monday	58	22
1390	CR1390	CR	2008.04.15 05:00	2008.04.15 01:30	2008.04.14 22:00	2008.04.15 05:00	2008	4	15	05:00	2008.04.15	2008.287455	2008.287056	0							0	None	input	near met. site at Carreg Wen	no	no		no	21	Monday	58	23
1391	CR1391	CR	2008.04.15 12:00	2008.04.15 08:30	2008.04.15 05:00	2008.04.15 12:00	2008	4	15	12:00	2008.04.15	2008.288251	2008.287853	0		3.28	-6.982	-39.61			0	None	input	near met. site at Carreg Wen	yes	yes	no	no	28	Tuesday	58	24	-6.982	-39.61	3.28
1392	CR1392	CR	2008.04.15 19:00	2008.04.15 12:30	2008.04.15 12:00	2008.04.15 19:00	2008	4	15	19:00	2008.04.15	2008.289048	2008.288308	0.07142857	-1.146128	4.66					0.5	None	input	near met. site at Carreg Wen	yes	no		no	7	Tuesday	59	1			4.66
1393	CR1393	CR	2008.04.16 02:00	2008.04.15 22:30	2008.04.15 19:00	2008.04.16 02:00	2008	4	16	02:00	2008.04.16	2008.289845	2008.289447	0							0	None	input	near met. site at Carreg Wen	no	no		no	7	Tuesday	59	2
1394	CR1394	CR	2008.04.16 09:00	2008.04.16 06:30	2008.04.16 02:00	2008.04.16 09:00	2008	4	16	09:00	2008.04.16	2008.290642	2008.290358	0.07142857	-1.146128	40.7					0.5	None	input	near met. site at Carreg Wen	yes	no		yes	14	Wednesday	59	3			40.7
1395	CR1395	CR	2008.04.16 16:00	2008.04.16 12:30	2008.04.16 09:00	2008.04.16 16:00	2008	4	16	16:00	2008.04.16	2008.291439	2008.291041	0							0	None	input	near met. site at Carreg Wen	no	no		no	7	Wednesday	59	4
1396	CR1396	CR	2008.04.16 23:00	2008.04.16 19:30	2008.04.16 16:00	2008.04.16 23:00	2008	4	16	23:00	2008.04.16	2008.292236	2008.291837	0							0	None	input	near met. site at Carreg Wen	no	no		no	14	Wednesday	59	5
1397	CR1397	CR	2008.04.17 06:00	2008.04.17 02:30	2008.04.16 23:00	2008.04.17 06:00	2008	4	17	06:00	2008.04.17	2008.293033	2008.292634	0							0	None	input	near met. site at Carreg Wen	no	no		no	21	Wednesday	59	6
1398	CR1398	CR	2008.04.17 13:00	2008.04.17 09:30	2008.04.17 06:00	2008.04.17 13:00	2008	4	17	13:00	2008.04.17	2008.29383	2008.293431	0		20.5					0	None	input	near met. site at Carreg Wen	yes	no		no	28	Thursday	59	7			20.5
1399	CR1399	CR	2008.04.17 20:00	2008.04.17 14:30	2008.04.17 13:00	2008.04.17 20:00	2008	4	17	20:00	2008.04.17	2008.294627	2008.294001	0.07142857	-1.146128						0.5	None	input	near met. site at Carreg Wen	no	no		no	7	Thursday	59	8
1400	CR1400	CR	2008.04.18 03:00	2008.04.17 23:30	2008.04.17 20:00	2008.04.18 03:00	2008	4	18	03:00	2008.04.18	2008.295424	2008.295025	0							0	None	input	near met. site at Carreg Wen	no	no		no	14	Thursday	59	9
1401	CR1401	CR	2008.04.18 10:00	2008.04.18 06:30	2008.04.18 03:00	2008.04.18 10:00	2008	4	18	10:00	2008.04.18	2008.29622	2008.295822	0							0	None	input	near met. site at Carreg Wen	no	no		no	21	Friday	59	10
1402	CR1402	CR	2008.04.18 17:00	2008.04.18 13:30	2008.04.18 10:00	2008.04.18 17:00	2008	4	18	17:00	2008.04.18	2008.297017	2008.296619	0							0	None	input	near met. site at Carreg Wen	no	no		no	28	Friday	59	11
1403	CR1403	CR	2008.04.19 00:00	2008.04.18 20:30	2008.04.18 17:00	2008.04.19 00:00	2008	4	19	00:00	2008.04.19	2008.297814	2008.297416	0							0	None	input	near met. site at Carreg Wen	no	no		no	35	Friday	59	12
1404	CR1404	CR	2008.04.19 07:00	2008.04.19 03:30	2008.04.19 00:00	2008.04.19 07:00	2008	4	19	07:00	2008.04.19	2008.298611	2008.298213	0							0	None	input	near met. site at Carreg Wen	no	no		no	42	Saturday	59	13
1405	CR1405	CR	2008.04.19 14:00	2008.04.19 10:30	2008.04.19 07:00	2008.04.19 14:00	2008	4	19	14:00	2008.04.19	2008.299408	2008.29901	0							0	None	input	near met. site at Carreg Wen	no	no		no	49	Saturday	59	14
1406	CR1406	CR	2008.04.19 21:00	2008.04.19 17:42	2008.04.19 14:00	2008.04.19 21:00	2008	4	19	21:00	2008.04.19	2008.300205	2008.299829	0.35714286	-0.447158	8.67	-9.838	-65.134			2.5	None	input	near met. site at Carreg Wen	yes	yes	no	no	56	Saturday	59	15	-9.838	-65.134	8.67
1407	CR1407	CR	2008.04.20 04:00	2008.04.20 00:30	2008.04.19 21:00	2008.04.20 04:00	2008	4	20	04:00	2008.04.20	2008.301002	2008.300603	0.07142857	-1.146128	24.2					0.5	None	input	near met. site at Carreg Wen	yes	no		no	7	Saturday	59	16			24.2
1408	CR1408	CR	2008.04.20 11:00	2008.04.20 06:30	2008.04.20 04:00	2008.04.20 11:00	2008	4	20	11:00	2008.04.20	2008.301799	2008.301286	0.14285714	-0.845098	7.62	-5.948	-36.084			1	None	input	near met. site at Carreg Wen	yes	yes	no	no	7	Sunday	59	17	-5.948	-36.084	7.62
1409	CR1409	CR	2008.04.20 18:00	2008.04.20 17:30	2008.04.20 11:00	2008.04.20 18:00	2008	4	20	18:00	2008.04.20	2008.302596	2008.302539	0.07142857	-1.146128						0.5	None	input	near met. site at Carreg Wen	no	no		no	7	Sunday	59	18
1410	CR1410	CR	2008.04.21 01:00	2008.04.20 21:30	2008.04.20 18:00	2008.04.21 01:00	2008	4	21	01:00	2008.04.21	2008.303393	2008.302994	0							0	None	input	near met. site at Carreg Wen	no	no		no	14	Sunday	59	19
1411	CR1411	CR	2008.04.21 08:00	2008.04.21 04:30	2008.04.21 01:00	2008.04.21 08:00	2008	4	21	08:00	2008.04.21	2008.304189	2008.303791	0							0	None	input	near met. site at Carreg Wen	no	no		no	21	Monday	59	20
1412	CR1412	CR	2008.04.21 15:00	2008.04.21 11:30	2008.04.21 08:00	2008.04.21 15:00	2008	4	21	15:00	2008.04.21	2008.304986	2008.304588	0							0	None	input	near met. site at Carreg Wen	no	no		no	28	Monday	59	21
1413	CR1413	CR	2008.04.21 22:00	2008.04.21 18:30	2008.04.21 15:00	2008.04.21 22:00	2008	4	21	22:00	2008.04.21	2008.305783	2008.305385	0							0	None	input	near met. site at Carreg Wen	no	no		no	35	Monday	59	22
1414	CR1414	CR	2008.04.22 05:00	2008.04.22 01:30	2008.04.21 22:00	2008.04.22 05:00	2008	4	22	05:00	2008.04.22	2008.30658	2008.306182	0							0	None	input	near met. site at Carreg Wen	no	no		no	42	Monday	59	23
1415	CR1415	CR	2008.04.22 12:00	2008.04.22 08:30	2008.04.22 05:00	2008.04.22 12:00	2008	4	22	12:00	2008.04.22	2008.307377	2008.306979	0.07142857	-1.146128						0.5	None	input	near met. site at Carreg Wen	no	no		no	49	Tuesday	59	24
1416	CR1416	CR	2008.04.22 19:00	2008.04.22 15:30	2008.04.22 12:00	2008.04.22 19:00	2008	4	22	19:00	2008.04.22	2008.308174	2008.307776	0							0	None	input	near met. site at Carreg Wen	no	no		no	56	Tuesday	60	1
1417	CR1417	CR	2008.04.23 02:00	2008.04.23 00:40	2008.04.22 19:00	2008.04.23 02:00	2008	4	23	02:00	2008.04.23	2008.308971	2008.308819	0.42857143	-0.3679768	2.62	-10.784	-79.998			3	None	input	near met. site at Carreg Wen	yes	yes	no	no	63	Tuesday	60	2	-10.784	-79.998	2.62
1418	CR1418	CR	2008.04.23 09:00	2008.04.23 05:30	2008.04.23 02:00	2008.04.23 09:00	2008	4	23	09:00	2008.04.23	2008.309768	2008.309369	0		0.99					0	None	input	near met. site at Carreg Wen	yes	no		no	7	Wednesday	60	3			0.99
1419	CR1419	CR	2008.04.23 16:00	2008.04.23 12:30	2008.04.23 09:00	2008.04.23 16:00	2008	4	23	16:00	2008.04.23	2008.310565	2008.310166	0							0	None	input	near met. site at Carreg Wen	no	no		no	7	Wednesday	60	4
1420	CR1420	CR	2008.04.23 23:00	2008.04.23 19:30	2008.04.23 16:00	2008.04.23 23:00	2008	4	23	23:00	2008.04.23	2008.311362	2008.310963	0							0	None	input	near met. site at Carreg Wen	no	no		no	14	Wednesday	60	5
1421	CR1421	CR	2008.04.24 06:00	2008.04.24 03:48	2008.04.23 23:00	2008.04.24 06:00	2008	4	24	06:00	2008.04.24	2008.312159	2008.311908	1.42857143	0.15490196	4.94	-5.829	-33.845			10	None	input	near met. site at Carreg Wen	yes	yes	no	no	21	Wednesday	60	6	-5.829	-33.845	4.94
1422	CR1422	CR	2008.04.24 13:00	2008.04.24 07:30	2008.04.24 06:00	2008.04.24 13:00	2008	4	24	13:00	2008.04.24	2008.312955	2008.312329	0.07142857	-1.146128	6.92					0.5	None	input	near met. site at Carreg Wen	yes	no		no	7	Thursday	60	7			6.92
1423	CR1423	CR	2008.04.24 20:00	2008.04.24 16:30	2008.04.24 13:00	2008.04.24 20:00	2008	4	24	20:00	2008.04.24	2008.313752	2008.313354	0							0	None	input	near met. site at Carreg Wen	no	no		no	7	Thursday	60	8
1424	CR1424	CR	2008.04.25 03:00	2008.04.24 23:30	2008.04.24 20:00	2008.04.25 03:00	2008	4	25	03:00	2008.04.25	2008.314549	2008.314151	0							0	None	input	near met. site at Carreg Wen	no	no		no	14	Thursday	60	9
1425	CR1425	CR	2008.04.25 10:00	2008.04.25 09:30	2008.04.25 03:00	2008.04.25 10:00	2008	4	25	10:00	2008.04.25	2008.315346	2008.315289	0.21428571	-0.6690068	46.1					1.5	None	input	near met. site at Carreg Wen	yes	no		yes	21	Friday	60	10			46.1
1426	CR1426	CR	2008.04.25 17:00	2008.04.25 13:52	2008.04.25 10:00	2008.04.25 17:00	2008	4	25	17:00	2008.04.25	2008.316143	2008.315787	1.92857143	0.28523573	1.93	-2.051	-1.067			13.5	None	input	near met. site at Carreg Wen	yes	yes	no	no	7	Friday	60	11	-2.051	-1.067	1.93
1427	CR1427	CR	2008.04.26 00:00	2008.04.25 19:30	2008.04.25 17:00	2008.04.26 00:00	2008	4	26	00:00	2008.04.26	2008.31694	2008.316428	0.42857143	-0.3679768	5.18	-2.438	-7.03			3	None	input	near met. site at Carreg Wen	yes	yes	no	no	7	Friday	60	12	-2.438	-7.03	5.18
1428	CR1428	CR	2008.04.26 07:00	2008.04.26 03:30	2008.04.26 00:00	2008.04.26 07:00	2008	4	26	07:00	2008.04.26	2008.317737	2008.317338	0							0	None	input	near met. site at Carreg Wen	no	no		no	7	Saturday	60	13
1429	CR1429	CR	2008.04.26 14:00	2008.04.26 10:30	2008.04.26 07:00	2008.04.26 14:00	2008	4	26	14:00	2008.04.26	2008.318534	2008.318135	0							0	None	input	near met. site at Carreg Wen	no	no		no	14	Saturday	60	14
1430	CR1430	CR	2008.04.26 21:00	2008.04.26 17:30	2008.04.26 14:00	2008.04.26 21:00	2008	4	26	21:00	2008.04.26	2008.319331	2008.318932	0							0	None	input	near met. site at Carreg Wen	no	no		no	21	Saturday	60	15
1431	CR1431	CR	2008.04.27 04:00	2008.04.27 01:47	2008.04.26 21:00	2008.04.27 04:00	2008	4	27	04:00	2008.04.27	2008.320128	2008.319875	0.5	-0.30103	1.68	-5.663	-37.826			3.5	None	input	near met. site at Carreg Wen	yes	yes	no	no	28	Saturday	60	16	-5.663	-37.826	1.68
1432	CR1432	CR	2008.04.27 11:00	2008.04.27 05:52	2008.04.27 04:00	2008.04.27 11:00	2008	4	27	11:00	2008.04.27	2008.320924	2008.320341	0.57142857	-0.243038	0.85	-8.379	-60.628			4	None	input	near met. site at Carreg Wen	yes	yes	no	no	7	Sunday	60	17	-8.379	-60.628	0.85
1433	CR1433	CR	2008.04.27 18:00	2008.04.27 14:30	2008.04.27 11:00	2008.04.27 18:00	2008	4	27	18:00	2008.04.27	2008.321721	2008.321323	0		1.93					0	None	input	near met. site at Carreg Wen	yes	no		no	7	Sunday	60	18			1.93
1434	CR1434	CR	2008.04.28 01:00	2008.04.27 23:16	2008.04.27 18:00	2008.04.28 01:00	2008	4	28	01:00	2008.04.28	2008.322518	2008.322322	0.64285714	-0.1918855	1.44	-9.943	-66.686			4.5	None	input	near met. site at Carreg Wen	yes	yes	no	no	7	Sunday	60	19	-9.943	-66.686	1.44
1435	CR1435	CR	2008.04.28 08:00	2008.04.28 04:11	2008.04.28 01:00	2008.04.28 08:00	2008	4	28	08:00	2008.04.28	2008.323315	2008.322881	3	0.47712125	2.13	-8.126	-54.233			21	None	input	near met. site at Carreg Wen	yes	yes	no	no	7	Monday	60	20	-8.126	-54.233	2.13
1436	CR1436	CR	2008.04.28 15:00	2008.04.28 11:30	2008.04.28 08:00	2008.04.28 15:00	2008	4	28	15:00	2008.04.28	2008.324112	2008.323714	0		1.86					0	None	input	near met. site at Carreg Wen	yes	no		no	7	Monday	60	21			1.86
1437	CR1437	CR	2008.04.28 22:00	2008.04.28 18:30	2008.04.28 15:00	2008.04.28 22:00	2008	4	28	22:00	2008.04.28	2008.324909	2008.324511	0							0	None	input	near met. site at Carreg Wen	no	no		no	7	Monday	60	22
1438	CR1438	CR	2008.04.29 05:00	2008.04.29 01:30	2008.04.28 22:00	2008.04.29 05:00	2008	4	29	05:00	2008.04.29	2008.325706	2008.325307	0							0	None	input	near met. site at Carreg Wen	no	no		no	14	Monday	60	23
1439	CR1439	CR	2008.04.29 12:00	2008.04.29 08:30	2008.04.29 05:00	2008.04.29 12:00	2008	4	29	12:00	2008.04.29	2008.326503	2008.326104	0							0	None	input	near met. site at Carreg Wen	no	no		no	21	Tuesday	60	24
1440	CR1440	CR	2008.04.29 19:00	2008.04.29 16:43	2008.04.29 12:00	2008.04.29 19:00	2008	4	29	19:00	2008.04.29	2008.3273	2008.327041	0.92857143	-0.0321847	0.82	-10.452	-69.588			6.5	None	input	near met. site at Carreg Wen	yes	yes	no	no	28	Tuesday	61	1	-10.452	-69.588	0.82
1441	CR1441	CR	2008.04.30 02:00	2008.04.29 21:19	2008.04.29 19:00	2008.04.30 02:00	2008	4	30	02:00	2008.04.30	2008.328097	2008.327564	1.57142857	0.19629465	0.52	-16.429	-115.035			11	None	input	near met. site at Carreg Wen	yes	yes	no	no	7	Tuesday	61	2	-16.429	-115.035	0.52
1442	CR1442	CR	2008.04.30 09:00	2008.04.30 03:30	2008.04.30 02:00	2008.04.30 09:00	2008	4	30	09:00	2008.04.30	2008.328893	2008.328267	0.21428571	-0.6690068	0.68	-16.575	-118.808			1.5	None	input	near met. site at Carreg Wen	yes	yes	no	no	7	Wednesday	61	3	-16.575	-118.808	0.68
1443	CR1443	CR	2008.04.30 16:00	2008.04.30 10:55	2008.04.30 09:00	2008.04.30 16:00	2008	4	30	16:00	2008.04.30	2008.32969	2008.329113	0.5	-0.30103	1.81	-9.695	-63.362			3.5	None	input	near met. site at Carreg Wen	yes	yes	no	no	7	Wednesday	61	4	-9.695	-63.362	1.81
1444	CR1444	CR	2008.04.30 23:00	2008.04.30 19:00	2008.04.30 16:00	2008.04.30 23:00	2008	4	30	23:00	2008.04.30	2008.330487	2008.330032	0.14285714	-0.845098	2.32	-11.204	-78.23			1	None	input	near met. site at Carreg Wen	yes	yes	no	no	7	Wednesday	61	5	-11.204	-78.23	2.32
1445	CR1445	CR	2008.05.01 06:00	2008.05.01 02:30	2008.04.30 23:00	2008.05.01 06:00	2008	5	1	06:00	2008.05.01	2008.331284	2008.330886	0							0	None	input	near met. site at Carreg Wen	no	no		no	7	Wednesday	61	6
1446	CR1446	CR	2008.05.01 13:00	2008.05.01 09:30	2008.05.01 06:00	2008.05.01 13:00	2008	5	1	13:00	2008.05.01	2008.332081	2008.331683	0							0	None	input	near met. site at Carreg Wen	no	no		no	14	Thursday	61	7
1447	CR1447	CR	2008.05.01 20:00	2008.05.01 18:30	2008.05.01 13:00	2008.05.01 20:00	2008	5	1	20:00	2008.05.01	2008.332878	2008.332707	0.21428571	-0.6690068	3.59	-6.681	-40.895			1.5	None	input	near met. site at Carreg Wen	yes	yes	no	no	21	Thursday	61	8	-6.681	-40.895	3.59
1448	CR1448	CR	2008.05.02 03:00	2008.05.01 23:30	2008.05.01 20:00	2008.05.02 03:00	2008	5	2	03:00	2008.05.02	2008.333675	2008.333276	0							0	None	input	near met. site at Carreg Wen	no	no		no	7	Thursday	61	9
1449	CR1449	CR	2008.05.02 10:00	2008.05.02 07:00	2008.05.02 03:00	2008.05.02 10:00	2008	5	2	10:00	2008.05.02	2008.334472	2008.33413	0.14285714	-0.845098	5.86	-3.772	-24.612			1	None	input	near met. site at Carreg Wen	yes	yes	no	no	14	Friday	61	10	-3.772	-24.612	5.86
1450	CR1450	CR	2008.05.02 17:00	2008.05.02 12:30	2008.05.02 10:00	2008.05.02 17:00	2008	5	2	17:00	2008.05.02	2008.335269	2008.334756	0.07142857	-1.146128						0.5	None	input	near met. site at Carreg Wen	no	no		no	7	Friday	61	11
1451	CR1451	CR	2008.05.03 00:00	2008.05.02 20:30	2008.05.02 17:00	2008.05.03 00:00	2008	5	3	00:00	2008.05.03	2008.336066	2008.335667	0							0	None	input	near met. site at Carreg Wen	no	no		no	14	Friday	61	12
1452	CR1452	CR	2008.05.03 07:00	2008.05.03 03:30	2008.05.03 00:00	2008.05.03 07:00	2008	5	3	07:00	2008.05.03	2008.336863	2008.336464	0							0	None	input	near met. site at Carreg Wen	no	no		no	21	Saturday	61	13
1453	CR1453	CR	2008.05.03 14:00	2008.05.03 10:30	2008.05.03 07:00	2008.05.03 14:00	2008	5	3	14:00	2008.05.03	2008.337659	2008.337261	0							0	None	input	near met. site at Carreg Wen	no	no		no	28	Saturday	61	14
1454	CR1454	CR	2008.05.03 21:00	2008.05.03 17:30	2008.05.03 14:00	2008.05.03 21:00	2008	5	3	21:00	2008.05.03	2008.338456	2008.338058	0							0	None	input	near met. site at Carreg Wen	no	no		no	35	Saturday	61	15
1455	CR1455	CR	2008.05.04 04:00	2008.05.04 00:30	2008.05.03 21:00	2008.05.04 04:00	2008	5	4	04:00	2008.05.04	2008.339253	2008.338855	0							0	None	input	near met. site at Carreg Wen	no	no		no	42	Saturday	61	16
1456	CR1456	CR	2008.05.04 11:00	2008.05.04 07:30	2008.05.04 04:00	2008.05.04 11:00	2008	5	4	11:00	2008.05.04	2008.34005	2008.339652	0							0	None	input	near met. site at Carreg Wen	no	no		no	49	Sunday	61	17
1457	CR1457	CR	2008.05.04 18:00	2008.05.04 14:30	2008.05.04 11:00	2008.05.04 18:00	2008	5	4	18:00	2008.05.04	2008.340847	2008.340449	0							0	None	input	near met. site at Carreg Wen	no	no		no	56	Sunday	61	18
1458	CR1458	CR	2008.05.05 01:00	2008.05.04 21:30	2008.05.04 18:00	2008.05.05 01:00	2008	5	5	01:00	2008.05.05	2008.341644	2008.341245	0							0	None	input	near met. site at Carreg Wen	no	no		no	63	Sunday	61	19
1459	CR1459	CR	2008.05.05 08:00	2008.05.05 04:30	2008.05.05 01:00	2008.05.05 08:00	2008	5	5	08:00	2008.05.05	2008.342441	2008.342042	0							0	None	input	near met. site at Carreg Wen	no	no		no	70	Monday	61	20
1460	CR1460	CR	2008.05.05 15:00	2008.05.05 11:30	2008.05.05 08:00	2008.05.05 15:00	2008	5	5	15:00	2008.05.05	2008.343238	2008.342839	0							0	None	input	near met. site at Carreg Wen	no	no		no	77	Monday	61	21
1461	CR1461	CR	2008.05.05 22:00	2008.05.05 18:30	2008.05.05 15:00	2008.05.05 22:00	2008	5	5	22:00	2008.05.05	2008.344035	2008.343636	0							0	None	input	near met. site at Carreg Wen	no	no		no	84	Monday	61	22
1462	CR1462	CR	2008.05.06 05:00	2008.05.06 01:30	2008.05.05 22:00	2008.05.06 05:00	2008	5	6	05:00	2008.05.06	2008.344832	2008.344433	0							0	None	input	near met. site at Carreg Wen	no	no		no	91	Monday	61	23
1463	CR1463	CR	2008.05.06 12:00	2008.05.06 08:30	2008.05.06 05:00	2008.05.06 12:00	2008	5	6	12:00	2008.05.06	2008.345628	2008.34523	0							0	None	input	near met. site at Carreg Wen	no	no		no	98	Tuesday	61	24
1464	CR1464	CR	2008.05.06 19:00	2008.05.06 15:30	2008.05.06 12:00	2008.05.06 19:00	2008	5	6	19:00	2008.05.06	2008.346425	2008.346027	0							0	None	input	near met. site at Carreg Wen	no	no		no	105	Tuesday	62	1
1465	CR1465	CR	2008.05.07 02:00	2008.05.06 22:30	2008.05.06 19:00	2008.05.07 02:00	2008	5	7	02:00	2008.05.07	2008.347222	2008.346824	0							0	None	input	near met. site at Carreg Wen	no	no		no	112	Tuesday	62	2
1466	CR1466	CR	2008.05.07 09:00	2008.05.07 05:30	2008.05.07 02:00	2008.05.07 09:00	2008	5	7	09:00	2008.05.07	2008.348019	2008.347621	0							0	None	input	near met. site at Carreg Wen	no	no		no	119	Wednesday	62	3
1467	CR1467	CR	2008.05.07 16:00	2008.05.07 12:30	2008.05.07 09:00	2008.05.07 16:00	2008	5	7	16:00	2008.05.07	2008.348816	2008.348418	0							0	None	input	near met. site at Carreg Wen	no	no		no	126	Wednesday	62	4
1468	CR1468	CR	2008.05.07 23:00	2008.05.07 19:30	2008.05.07 16:00	2008.05.07 23:00	2008	5	7	23:00	2008.05.07	2008.349613	2008.349215	0							0	None	input	near met. site at Carreg Wen	no	no		no	133	Wednesday	62	5
1469	CR1469	CR	2008.05.08 06:00	2008.05.08 02:30	2008.05.07 23:00	2008.05.08 06:00	2008	5	8	06:00	2008.05.08	2008.35041	2008.350011	0							0	None	input	near met. site at Carreg Wen	no	no		no	140	Wednesday	62	6
1470	CR1470	CR	2008.05.08 13:00	2008.05.08 09:30	2008.05.08 06:00	2008.05.08 13:00	2008	5	8	13:00	2008.05.08	2008.351207	2008.350808	0							0	None	input	near met. site at Carreg Wen	no	no		no	147	Thursday	62	7
1471	CR1471	CR	2008.05.08 20:00	2008.05.08 16:30	2008.05.08 13:00	2008.05.08 20:00	2008	5	8	20:00	2008.05.08	2008.352004	2008.351605	0							0	None	input	near met. site at Carreg Wen	no	no		no	154	Thursday	62	8
1472	CR1472	CR	2008.05.09 03:00	2008.05.09 00:00	2008.05.08 20:00	2008.05.09 03:00	2008	5	9	03:00	2008.05.09	2008.352801	2008.352459	0.14285714	-0.845098	16.2	-4.15	-27.439			1	None	input	near met. site at Carreg Wen	yes	yes	no	no	161	Thursday	62	9	-4.15	-27.439	16.2
1473	CR1473	CR	2008.05.09 10:00	2008.05.09 06:30	2008.05.09 03:00	2008.05.09 10:00	2008	5	9	10:00	2008.05.09	2008.353597	2008.353199	0.14285714	-0.845098	29.2	-1.821	-5.116			1	None	input	near met. site at Carreg Wen	yes	yes	no	yes	7	Friday	62	10	-1.821	-5.116	29.2
1474	CR1474	CR	2008.05.09 17:00	2008.05.09 13:30	2008.05.09 10:00	2008.05.09 17:00	2008	5	9	17:00	2008.05.09	2008.354394	2008.353996	0							0	None	input	near met. site at Carreg Wen	no	no		no	7	Friday	62	11
1475	CR1475	CR	2008.05.10 00:00	2008.05.09 22:30	2008.05.09 17:00	2008.05.10 00:00	2008	5	10	00:00	2008.05.10	2008.355191	2008.355021	0.57142857	-0.243038	0.67	-3.874	-22.833			4	None	input	near met. site at Carreg Wen	yes	yes	no	no	14	Friday	62	12	-3.874	-22.833	0.67
1476	CR1476	CR	2008.05.10 07:00	2008.05.10 03:30	2008.05.10 00:00	2008.05.10 07:00	2008	5	10	07:00	2008.05.10	2008.355988	2008.35559	0							0	None	input	near met. site at Carreg Wen	no	no		no	7	Saturday	62	13
1477	CR1477	CR	2008.05.10 14:00	2008.05.10 10:30	2008.05.10 07:00	2008.05.10 14:00	2008	5	10	14:00	2008.05.10	2008.356785	2008.356387	0.07142857	-1.146128						0.5	None	input	near met. site at Carreg Wen	no	no		no	14	Saturday	62	14
1478	CR1478	CR	2008.05.10 21:00	2008.05.10 17:30	2008.05.10 14:00	2008.05.10 21:00	2008	5	10	21:00	2008.05.10	2008.357582	2008.357184	0							0	None	input	near met. site at Carreg Wen	no	no		no	21	Saturday	62	15
1479	CR1479	CR	2008.05.11 04:00	2008.05.11 00:30	2008.05.10 21:00	2008.05.11 04:00	2008	5	11	04:00	2008.05.11	2008.358379	2008.35798	0							0	None	input	near met. site at Carreg Wen	no	no		no	28	Saturday	62	16
1480	CR1480	CR	2008.05.11 11:00	2008.05.11 07:30	2008.05.11 04:00	2008.05.11 11:00	2008	5	11	11:00	2008.05.11	2008.359176	2008.358777	0							0	None	input	near met. site at Carreg Wen	no	no		no	35	Sunday	62	17
1481	CR1481	CR	2008.05.11 18:00	2008.05.11 14:30	2008.05.11 11:00	2008.05.11 18:00	2008	5	11	18:00	2008.05.11	2008.359973	2008.359574	0							0	None	input	near met. site at Carreg Wen	no	no		no	42	Sunday	62	18
1482	CR1482	CR	2008.05.12 01:00	2008.05.11 21:30	2008.05.11 18:00	2008.05.12 01:00	2008	5	12	01:00	2008.05.12	2008.36077	2008.360371	0							0	None	input	near met. site at Carreg Wen	no	no		no	49	Sunday	62	19
1483	CR1483	CR	2008.05.12 08:00	2008.05.12 04:30	2008.05.12 01:00	2008.05.12 08:00	2008	5	12	08:00	2008.05.12	2008.361567	2008.361168	0							0	None	input	near met. site at Carreg Wen	no	no		no	56	Monday	62	20
1484	CR1484	CR	2008.05.12 15:00	2008.05.12 11:30	2008.05.12 08:00	2008.05.12 15:00	2008	5	12	15:00	2008.05.12	2008.362363	2008.361965	0							0	None	input	near met. site at Carreg Wen	no	no		no	63	Monday	62	21
1485	CR1485	CR	2008.05.12 22:00	2008.05.12 18:30	2008.05.12 15:00	2008.05.12 22:00	2008	5	12	22:00	2008.05.12	2008.36316	2008.362762	0							0	None	input	near met. site at Carreg Wen	no	no		no	70	Monday	62	22
1486	CR1486	CR	2008.05.13 05:00	2008.05.13 01:30	2008.05.12 22:00	2008.05.13 05:00	2008	5	13	05:00	2008.05.13	2008.363957	2008.363559	0							0	None	input	near met. site at Carreg Wen	no	no		no	77	Monday	62	23
1487	CR1487	CR	2008.05.13 12:00	2008.05.13 08:30	2008.05.13 05:00	2008.05.13 12:00	2008	5	13	12:00	2008.05.13	2008.364754	2008.364356	0							0	None	input	near met. site at Carreg Wen	no	no		no	84	Tuesday	62	24
1488	CR1488	CR	2008.05.13 19:00	2008.05.13 15:30	2008.05.13 12:00	2008.05.13 19:00	2008	5	13	19:00	2008.05.13	2008.365551	2008.365153	0							0	None	input	near met. site at Carreg Wen	no	no		no	91	Tuesday	63	1
1489	CR1489	CR	2008.05.14 02:00	2008.05.13 22:30	2008.05.13 19:00	2008.05.14 02:00	2008	5	14	02:00	2008.05.14	2008.366348	2008.36595	0							0	None	input	near met. site at Carreg Wen	no	no		no	98	Tuesday	63	2
1490	CR1490	CR	2008.05.14 09:00	2008.05.14 05:30	2008.05.14 02:00	2008.05.14 09:00	2008	5	14	09:00	2008.05.14	2008.367145	2008.366746	0							0	None	input	near met. site at Carreg Wen	no	no		no	105	Wednesday	63	3
1491	CR1491	CR	2008.05.14 16:00	2008.05.14 12:30	2008.05.14 09:00	2008.05.14 16:00	2008	5	14	16:00	2008.05.14	2008.367942	2008.367543	0							0	None	input	near met. site at Carreg Wen	no	no		no	112	Wednesday	63	4
1492	CR1492	CR	2008.05.14 23:00	2008.05.14 19:30	2008.05.14 16:00	2008.05.14 23:00	2008	5	14	23:00	2008.05.14	2008.368739	2008.36834	0							0	None	input	near met. site at Carreg Wen	no	no		no	119	Wednesday	63	5
1493	CR1493	CR	2008.05.15 06:00	2008.05.15 02:30	2008.05.14 23:00	2008.05.15 06:00	2008	5	15	06:00	2008.05.15	2008.369536	2008.369137	0							0	None	input	near met. site at Carreg Wen	no	no		no	126	Wednesday	63	6
1494	CR1494	CR	2008.05.15 13:00	2008.05.15 12:30	2008.05.15 06:00	2008.05.15 13:00	2008	5	15	13:00	2008.05.15	2008.370332	2008.370276	0.14285714	-0.845098	53.4					1	Notable Pollen staining on top of sampler disc	input	near met. site at Carreg Wen	yes	no		yes	133	Thursday	63	7			53.4
1495	CR1495	CR	2008.05.15 20:00	2008.05.15 13:30	2008.05.15 13:00	2008.05.15 20:00	2008	5	15	20:00	2008.05.15	2008.371129	2008.370389	0.14285714	-0.845098	10.8	-5.998	-40.578			1	Notable Pollen staining on top of sampler disc	input	near met. site at Carreg Wen	yes	yes	no	no	7	Thursday	63	8	-5.998	-40.578	10.8
1496	CR1496	CR	2008.05.16 03:00	2008.05.15 23:30	2008.05.15 20:00	2008.05.16 03:00	2008	5	16	03:00	2008.05.16	2008.371926	2008.371528	0							0	None	input	near met. site at Carreg Wen	no	no		no	7	Thursday	63	9
1497	CR1497	CR	2008.05.16 10:00	2008.05.16 07:30	2008.05.16 03:00	2008.05.16 10:00	2008	5	16	10:00	2008.05.16	2008.372723	2008.372439	0.42857143	-0.3679768	12	-6.208	-37.982			3	Notable Pollen staining on top of sampler disc	input	near met. site at Carreg Wen	yes	yes	no	no	14	Friday	63	10	-6.208	-37.982	12
1498	CR1498	CR	2008.05.16 17:00	2008.05.16 11:45	2008.05.16 10:00	2008.05.16 17:00	2008	5	16	17:00	2008.05.16	2008.37352	2008.372922	0.28571429	-0.544068	6.72	-10.684	-74.061			2	Notable Pollen staining on top of sampler disc	input	near met. site at Carreg Wen	yes	yes	no	no	7	Friday	63	11	-10.684	-74.061	6.72
1499	CR1499	CR	2008.05.17 00:00	2008.05.16 21:30	2008.05.16 17:00	2008.05.17 00:00	2008	5	17	00:00	2008.05.17	2008.374317	2008.374032	0.21428571	-0.6690068	6.36	-6.619	-40.802			1.5	None	input	near met. site at Carreg Wen	yes	yes	no	no	7	Friday	63	12	-6.619	-40.802	6.36
1500	CR1500	CR	2008.05.17 07:00	2008.05.17 03:45	2008.05.17 00:00	2008.05.17 07:00	2008	5	17	07:00	2008.05.17	2008.375114	2008.374744	0.28571429	-0.544068	4.53	-5.559	-35.128			2	None	input	near met. site at Carreg Wen	yes	yes	no	no	7	Saturday	63	13	-5.559	-35.128	4.53
1501	CR1501	CR	2008.05.17 14:00	2008.05.17 09:00	2008.05.17 07:00	2008.05.17 14:00	2008	5	17	14:00	2008.05.17	2008.375911	2008.375342	0.28571429	-0.544068	4.49	-4.378	-24.535			2	None	input	near met. site at Carreg Wen	yes	yes	no	no	7	Saturday	63	14	-4.378	-24.535	4.49
1502	CR1502	CR	2008.05.17 21:00	2008.05.17 18:10	2008.05.17 14:00	2008.05.17 21:00	2008	5	17	21:00	2008.05.17	2008.376708	2008.376385	0.21428571	-0.6690068	2.57	-5.064	-26.793			1.5	None	input	near met. site at Carreg Wen	yes	yes	no	no	7	Saturday	63	15	-5.064	-26.793	2.57
1503	CR1503	CR	2008.05.18 04:00	2008.05.17 21:30	2008.05.17 21:00	2008.05.18 04:00	2008	5	18	04:00	2008.05.18	2008.377505	2008.376765	0.07142857	-1.146128	6					0.5	None	input	near met. site at Carreg Wen	yes	no		no	7	Saturday	63	16			6
1504	CR1504	CR	2008.05.18 11:00	2008.05.18 07:30	2008.05.18 04:00	2008.05.18 11:00	2008	5	18	11:00	2008.05.18	2008.378302	2008.377903	0							0	None	input	near met. site at Carreg Wen	no	no		no	7	Sunday	63	17
1505	CR1505	CR	2008.05.18 18:00	2008.05.18 14:30	2008.05.18 11:00	2008.05.18 18:00	2008	5	18	18:00	2008.05.18	2008.379098	2008.3787	0							0	None	input	near met. site at Carreg Wen	no	no		no	14	Sunday	63	18
1506	CR1506	CR	2008.05.19 01:00	2008.05.18 21:30	2008.05.18 18:00	2008.05.19 01:00	2008	5	19	01:00	2008.05.19	2008.379895	2008.379497	0							0	None	input	near met. site at Carreg Wen	no	no		no	21	Sunday	63	19
1507	CR1507	CR	2008.05.19 08:00	2008.05.19 04:30	2008.05.19 01:00	2008.05.19 08:00	2008	5	19	08:00	2008.05.19	2008.380692	2008.380294	0							0	None	input	near met. site at Carreg Wen	no	no		no	28	Monday	63	20
1508	CR1508	CR	2008.05.19 15:00	2008.05.19 11:30	2008.05.19 08:00	2008.05.19 15:00	2008	5	19	15:00	2008.05.19	2008.381489	2008.381091	0							0	None	input	near met. site at Carreg Wen	no	no		no	35	Monday	63	21
1509	CR1509	CR	2008.05.19 22:00	2008.05.19 18:30	2008.05.19 15:00	2008.05.19 22:00	2008	5	19	22:00	2008.05.19	2008.382286	2008.381888	0							0	None	input	near met. site at Carreg Wen	no	no		no	42	Monday	63	22
1510	CR1510	CR	2008.05.20 05:00	2008.05.20 01:30	2008.05.19 22:00	2008.05.20 05:00	2008	5	20	05:00	2008.05.20	2008.383083	2008.382684	0							0	None	input	near met. site at Carreg Wen	no	no		no	49	Monday	63	23
1511	CR1511	CR	2008.05.20 12:00	2008.05.20 08:30	2008.05.20 05:00	2008.05.20 12:00	2008	5	20	12:00	2008.05.20	2008.38388	2008.383481	0							0	None	input	near met. site at Carreg Wen	no	no		no	56	Tuesday	63	24
1512	CR1512	CR	2008.05.20 19:00	2008.05.20 15:30	2008.05.20 12:00	2008.05.20 19:00	2008	5	20	19:00	2008.05.20	2008.384677	2008.384278	0							0	None	input	near met. site at Carreg Wen	no	no		no	63	Tuesday	64	1
1513	CR1513	CR	2008.05.21 02:00	2008.05.20 22:30	2008.05.20 19:00	2008.05.21 02:00	2008	5	21	02:00	2008.05.21	2008.385474	2008.385075	0							0	None	input	near met. site at Carreg Wen	no	no		no	70	Tuesday	64	2
1514	CR1514	CR	2008.05.21 09:00	2008.05.21 05:30	2008.05.21 02:00	2008.05.21 09:00	2008	5	21	09:00	2008.05.21	2008.386271	2008.385872	0							0	None	input	near met. site at Carreg Wen	no	no		no	77	Wednesday	64	3
1515	CR1515	CR	2008.05.21 16:00	2008.05.21 12:30	2008.05.21 09:00	2008.05.21 16:00	2008	5	21	16:00	2008.05.21	2008.387067	2008.386669	0							0	None	input	near met. site at Carreg Wen	no	no		no	84	Wednesday	64	4
1516	CR1516	CR	2008.05.21 23:00	2008.05.21 19:30	2008.05.21 16:00	2008.05.21 23:00	2008	5	21	23:00	2008.05.21	2008.387864	2008.387466	0							0	None	input	near met. site at Carreg Wen	no	no		no	91	Wednesday	64	5
1517	CR1517	CR	2008.05.22 06:00	2008.05.22 02:30	2008.05.21 23:00	2008.05.22 06:00	2008	5	22	06:00	2008.05.22	2008.388661	2008.388263	0							0	None	input	near met. site at Carreg Wen	no	no		no	98	Wednesday	64	6
1518	CR1518	CR	2008.05.22 13:00	2008.05.22 12:30	2008.05.22 06:00	2008.05.22 13:00	2008	5	22	13:00	2008.05.22	2008.389458	2008.389401	0.21428571	-0.6690068						1.5	None	input	near met. site at Carreg Wen	no	no		no	105	Thursday	64	7
1519	CR1519	CR	2008.05.22 20:00	2008.05.22 15:00	2008.05.22 13:00	2008.05.22 20:00	2008	5	22	20:00	2008.05.22	2008.390255	2008.389686	0.14285714	-0.845098	9.14	-2.007	-2.981			1	None	input	near met. site at Carreg Wen	yes	yes	no	no	112	Thursday	64	8	-2.007	-2.981	9.14
1520	CR1520	CR	2008.05.23 03:00	2008.05.22 23:30	2008.05.22 20:00	2008.05.23 03:00	2008	5	23	03:00	2008.05.23	2008.391052	2008.390654	0							0	None	input	near met. site at Carreg Wen	no	no		no	7	Thursday	64	9
1521	CR1521	CR	2008.05.23 10:00	2008.05.23 06:30	2008.05.23 03:00	2008.05.23 10:00	2008	5	23	10:00	2008.05.23	2008.391849	2008.39145	0							0	None	input	near met. site at Carreg Wen	no	no		no	14	Friday	64	10
1522	CR1522	CR	2008.05.23 17:00	2008.05.23 13:30	2008.05.23 10:00	2008.05.23 17:00	2008	5	23	17:00	2008.05.23	2008.392646	2008.392247	0							0	None	input	near met. site at Carreg Wen	no	no		no	21	Friday	64	11
1523	CR1523	CR	2008.05.24 00:00	2008.05.23 17:30	2008.05.23 17:00	2008.05.24 00:00	2008	5	24	00:00	2008.05.24	2008.393443	2008.392703	0.07142857	-1.146128	8.8	-3.547	-14.542			0.5	None	input	near met. site at Carreg Wen	yes	yes	no	no	28	Friday	64	12	-3.547	-14.542	8.8
1524	CR1524	CR	2008.05.24 07:00	2008.05.24 03:30	2008.05.24 00:00	2008.05.24 07:00	2008	5	24	07:00	2008.05.24	2008.39424	2008.393841	0							0	None	input	near met. site at Carreg Wen	no	no		no	7	Saturday	64	13
1525	CR1525	CR	2008.05.24 14:00	2008.05.24 09:30	2008.05.24 07:00	2008.05.24 14:00	2008	5	24	14:00	2008.05.24	2008.395036	2008.394524	0.07142857	-1.146128						0.5	None	input	near met. site at Carreg Wen	no	no		no	14	Saturday	64	14
1526	CR1526	CR	2008.05.24 21:00	2008.05.24 17:30	2008.05.24 14:00	2008.05.24 21:00	2008	5	24	21:00	2008.05.24	2008.395833	2008.395435	0							0	None	input	near met. site at Carreg Wen	no	no		no	21	Saturday	64	15
1527	CR1527	CR	2008.05.25 04:00	2008.05.25 00:30	2008.05.24 21:00	2008.05.25 04:00	2008	5	25	04:00	2008.05.25	2008.39663	2008.396232	0							0	None	input	near met. site at Carreg Wen	no	no		no	28	Saturday	64	16
1528	CR1528	CR	2008.05.25 11:00	2008.05.25 09:18	2008.05.25 04:00	2008.05.25 11:00	2008	5	25	11:00	2008.05.25	2008.397427	2008.397234	0.35714286	-0.447158	6.5	-7.489	-52.873			2.5	None	input	near met. site at Carreg Wen	yes	yes	no	no	35	Sunday	64	17	-7.489	-52.873	6.5
1529	CR1529	CR	2008.05.25 18:00	2008.05.25 13:55	2008.05.25 11:00	2008.05.25 18:00	2008	5	25	18:00	2008.05.25	2008.398224	2008.397761	0.5	-0.30103	5.66	-5.833	-33.397			3.5	None	input	near met. site at Carreg Wen	yes	yes	no	no	7	Sunday	64	18	-5.833	-33.397	5.66
1530	CR1530	CR	2008.05.26 01:00	2008.05.25 21:30	2008.05.25 18:00	2008.05.26 01:00	2008	5	26	01:00	2008.05.26	2008.399021	2008.398623	0							0	None	input	near met. site at Carreg Wen	no	no		no	7	Sunday	64	19
1531	CR1531	CR	2008.05.26 08:00	2008.05.26 04:30	2008.05.26 01:00	2008.05.26 08:00	2008	5	26	08:00	2008.05.26	2008.399818	2008.399419	0							0	None	input	near met. site at Carreg Wen	no	no		no	14	Monday	64	20
1532	CR1532	CR	2008.05.26 15:00	2008.05.26 13:30	2008.05.26 08:00	2008.05.26 15:00	2008	5	26	15:00	2008.05.26	2008.400615	2008.400444	0.14285714	-0.845098	6.52	-6.006	-46.704			1	None	input	near met. site at Carreg Wen	yes	yes	no	no	21	Monday	64	21	-6.006	-46.704	6.52
1533	CR1533	CR	2008.05.26 22:00	2008.05.26 15:30	2008.05.26 15:00	2008.05.26 22:00	2008	5	26	22:00	2008.05.26	2008.401412	2008.400672	0.14285714	-0.845098	2.23	-5.501	-38.135			1	None	input	near met. site at Carreg Wen	yes	yes	no	no	7	Monday	64	22	-5.501	-38.135	2.23
1534	CR1534	CR	2008.05.27 05:00	2008.05.27 01:10	2008.05.26 22:00	2008.05.27 05:00	2008	5	27	05:00	2008.05.27	2008.402209	2008.401772	0.42857143	-0.3679768	1.46	-9.478	-62.523			3	None	input	near met. site at Carreg Wen	yes	yes	no	no	7	Monday	64	23	-9.478	-62.523	1.46
1535	CR1535	CR	2008.05.27 12:00	2008.05.27 06:00	2008.05.27 05:00	2008.05.27 12:00	2008	5	27	12:00	2008.05.27	2008.403006	2008.402322	0.28571429	-0.544068	1.01	-8.923	-58.068			2	None	input	near met. site at Carreg Wen	yes	yes	no	no	7	Tuesday	64	24	-8.923	-58.068	1.01
1536	CR1536	CR	2008.05.27 19:00	2008.05.27 15:30	2008.05.27 12:00	2008.05.27 19:00	2008	5	27	19:00	2008.05.27	2008.403802	2008.403404	0							0	None	input	near met. site at Carreg Wen	no	no		no	7	Tuesday	65	1
1537	CR1537	CR	2008.05.28 02:00	2008.05.27 22:30	2008.05.27 19:00	2008.05.28 02:00	2008	5	28	02:00	2008.05.28	2008.404599	2008.404201	0							0	None	input	near met. site at Carreg Wen	no	no		no	14	Tuesday	65	2
1538	CR1538	CR	2008.05.28 09:00	2008.05.28 03:30	2008.05.28 02:00	2008.05.28 09:00	2008	5	28	09:00	2008.05.28	2008.405396	2008.40477	0.07142857	-1.146128						0.5	None	input	near met. site at Carreg Wen	no	no		no	21	Wednesday	65	3
1539	CR1539	CR	2008.05.28 16:00	2008.05.28 11:42	2008.05.28 09:00	2008.05.28 16:00	2008	5	28	16:00	2008.05.28	2008.406193	2008.405705	1.35714286	0.13262557	1.51	-11.279	-80.363			9.5	None	input	near met. site at Carreg Wen	yes	yes	no	no	28	Wednesday	65	4	-11.279	-80.363	1.51
1540	CR1540	CR	2008.05.28 23:00	2008.05.28 18:30	2008.05.28 16:00	2008.05.28 23:00	2008	5	28	23:00	2008.05.28	2008.40699	2008.406478	0.14285714	-0.845098	8.75	-8.488	-60.432			1	None	input	near met. site at Carreg Wen	yes	yes	no	no	7	Wednesday	65	5	-8.488	-60.432	8.75
1541	CR1541	CR	2008.05.29 06:00	2008.05.29 02:30	2008.05.28 23:00	2008.05.29 06:00	2008	5	29	06:00	2008.05.29	2008.407787	2008.407388	0							0	None	input	near met. site at Carreg Wen	no	no		no	7	Wednesday	65	6
1542	CR1542	CR	2008.05.29 13:00	2008.05.29 09:30	2008.05.29 06:00	2008.05.29 13:00	2008	5	29	13:00	2008.05.29	2008.408584	2008.408185	0							0	None	input	near met. site at Carreg Wen	no	no		no	14	Thursday	65	7
1543	CR1543	CR	2008.05.29 20:00	2008.05.29 16:30	2008.05.29 13:00	2008.05.29 20:00	2008	5	29	20:00	2008.05.29	2008.409381	2008.408982	0							0	None	input	near met. site at Carreg Wen	no	no		no	21	Thursday	65	8
1544	CR1544	CR	2008.05.30 03:00	2008.05.29 23:30	2008.05.29 20:00	2008.05.30 03:00	2008	5	30	03:00	2008.05.30	2008.410178	2008.409779	0							0	None	input	near met. site at Carreg Wen	no	no		no	28	Thursday	65	9
1545	CR1545	CR	2008.05.30 10:00	2008.05.30 06:30	2008.05.30 03:00	2008.05.30 10:00	2008	5	30	10:00	2008.05.30	2008.410975	2008.410576	0							0	None	input	near met. site at Carreg Wen	no	no		no	35	Friday	65	10
1546	CR1546	CR	2008.05.30 17:00	2008.05.30 13:30	2008.05.30 10:00	2008.05.30 17:00	2008	5	30	17:00	2008.05.30	2008.411771	2008.411373	0							0	None	input	near met. site at Carreg Wen	no	no		no	42	Friday	65	11
1547	CR1547	CR	2008.05.31 00:00	2008.05.30 20:30	2008.05.30 17:00	2008.05.31 00:00	2008	5	31	00:00	2008.05.31	2008.412568	2008.41217	0							0	None	input	near met. site at Carreg Wen	no	no		no	49	Friday	65	12
1548	CR1548	CR	2008.05.31 07:00	2008.05.31 00:30	2008.05.31 00:00	2008.05.31 07:00	2008	5	31	07:00	2008.05.31	2008.413365	2008.412625	0.07142857	-1.146128						0.5	None	input	near met. site at Carreg Wen	no	no		no	56	Saturday	65	13
1549	CR1549	CR	2008.05.31 14:00	2008.05.31 10:30	2008.05.31 07:00	2008.05.31 14:00	2008	5	31	14:00	2008.05.31	2008.414162	2008.413764	0							0	None	input	near met. site at Carreg Wen	no	no		no	63	Saturday	65	14
1550	CR1550	CR	2008.05.31 21:00	2008.05.31 17:30	2008.05.31 14:00	2008.05.31 21:00	2008	5	31	21:00	2008.05.31	2008.414959	2008.414561	0							0	None	input	near met. site at Carreg Wen	no	no		no	70	Saturday	65	15
1551	CR1551	CR	2008.06.01 04:00	2008.06.01 00:30	2008.05.31 21:00	2008.06.01 04:00	2008	6	1	04:00	2008.06.01	2008.415756	2008.415358	0							0	None	input	near met. site at Carreg Wen	no	no		no	77	Saturday	65	16
1552	CR1552	CR	2008.06.01 11:00	2008.06.01 07:30	2008.06.01 04:00	2008.06.01 11:00	2008	6	1	11:00	2008.06.01	2008.416553	2008.416154	0							0	None	input	near met. site at Carreg Wen	no	no		no	84	Sunday	65	17
1553	CR1553	CR	2008.06.01 18:00	2008.06.01 14:30	2008.06.01 11:00	2008.06.01 18:00	2008	6	1	18:00	2008.06.01	2008.41735	2008.416951	0							0	None	input	near met. site at Carreg Wen	no	no		no	91	Sunday	65	18
1554	CR1554	CR	2008.06.02 01:00	2008.06.01 21:30	2008.06.01 18:00	2008.06.02 01:00	2008	6	2	01:00	2008.06.02	2008.418147	2008.417748	0							0	None	input	near met. site at Carreg Wen	no	no		no	98	Sunday	65	19
1555	CR1555	CR	2008.06.02 08:00	2008.06.02 04:30	2008.06.02 01:00	2008.06.02 08:00	2008	6	2	08:00	2008.06.02	2008.418944	2008.418545	0							0	None	input	near met. site at Carreg Wen	no	no		no	105	Monday	65	20
1556	CR1556	CR	2008.06.02 15:00	2008.06.02 14:30	2008.06.02 08:00	2008.06.02 15:00	2008	6	2	15:00	2008.06.02	2008.41974	2008.419684	0.07142857	-1.146128						0.5	None	input	near met. site at Carreg Wen	no	no		no	112	Monday	65	21
1557	CR1557	CR	2008.06.02 22:00	2008.06.02 17:50	2008.06.02 15:00	2008.06.02 22:00	2008	6	2	22:00	2008.06.02	2008.420537	2008.420063	0.21428571	-0.6690068	8.75	-3.662	-20.075			1.5	None	input	near met. site at Carreg Wen	yes	yes	no	no	119	Monday	65	22	-3.662	-20.075	8.75
1558	CR1558	CR	2008.06.03 05:00	2008.06.02 23:00	2008.06.02 22:00	2008.06.03 05:00	2008	6	3	05:00	2008.06.03	2008.421334	2008.420651	0.14285714	-0.845098	6.02	-3.656	-17.292			1	None	input	near met. site at Carreg Wen	yes	yes	no	no	7	Monday	65	23	-3.656	-17.292	6.02
1559	CR1559	CR	2008.06.03 12:00	2008.06.03 08:30	2008.06.03 05:00	2008.06.03 12:00	2008	6	3	12:00	2008.06.03	2008.422131	2008.421733	0							0	None	input	near met. site at Carreg Wen	no	no		no	7	Tuesday	65	24
1560	CR1560	CR	2008.06.03 19:00	2008.06.03 15:30	2008.06.03 12:00	2008.06.03 19:00	2008	6	3	19:00	2008.06.03	2008.422928	2008.42253	0							0	None	input	near met. site at Carreg Wen	no	no		no	14	Tuesday	66	1
1561	CR1561	CR	2008.06.04 02:00	2008.06.03 22:30	2008.06.03 19:00	2008.06.04 02:00	2008	6	4	02:00	2008.06.04	2008.423725	2008.423327	0							0	None	input	near met. site at Carreg Wen	no	no		no	21	Tuesday	66	2
1562	CR1562	CR	2008.06.04 09:00	2008.06.04 05:30	2008.06.04 02:00	2008.06.04 09:00	2008	6	4	09:00	2008.06.04	2008.424522	2008.424123	0							0	None	input	near met. site at Carreg Wen	no	no		no	28	Wednesday	66	3
1563	CR1563	CR	2008.06.04 16:00	2008.06.04 12:30	2008.06.04 09:00	2008.06.04 16:00	2008	6	4	16:00	2008.06.04	2008.425319	2008.42492	0							0	None	input	near met. site at Carreg Wen	no	no		no	35	Wednesday	66	4
1564	CR1564	CR	2008.06.04 23:00	2008.06.04 19:30	2008.06.04 16:00	2008.06.04 23:00	2008	6	4	23:00	2008.06.04	2008.426116	2008.425717	0							0	None	input	near met. site at Carreg Wen	no	no		no	42	Wednesday	66	5
1565	CR1565	CR	2008.06.05 06:00	2008.06.05 03:06	2008.06.04 23:00	2008.06.05 06:00	2008	6	5	06:00	2008.06.05	2008.426913	2008.426582	0.35714286	-0.447158	8.04	-8.746	-58.762			2.5	None	input	near met. site at Carreg Wen	yes	yes	no	no	49	Wednesday	66	6	-8.746	-58.762	8.04
1566	CR1566	CR	2008.06.05 13:00	2008.06.05 10:00	2008.06.05 06:00	2008.06.05 13:00	2008	6	5	13:00	2008.06.05	2008.42771	2008.427368	0.28571429	-0.544068	4.07	-8.505	-58.168			2	None	input	near met. site at Carreg Wen	yes	yes	no	no	7	Thursday	66	7	-8.505	-58.168	4.07
1567	CR1567	CR	2008.06.05 20:00	2008.06.05 17:40	2008.06.05 13:00	2008.06.05 20:00	2008	6	5	20:00	2008.06.05	2008.428506	2008.428241	0.42857143	-0.3679768	1.77	-7.719	-55.248			3	None	input	near met. site at Carreg Wen	yes	yes	no	no	7	Thursday	66	8	-7.719	-55.248	1.77
1568	CR1568	CR	2008.06.06 03:00	2008.06.05 22:00	2008.06.05 20:00	2008.06.06 03:00	2008	6	6	03:00	2008.06.06	2008.429303	2008.428734	0.14285714	-0.845098	3.5	-7.904	-53.672			1	None	input	near met. site at Carreg Wen	yes	yes	no	no	7	Thursday	66	9	-7.904	-53.672	3.5
1569	CR1569	CR	2008.06.06 10:00	2008.06.06 06:30	2008.06.06 03:00	2008.06.06 10:00	2008	6	6	10:00	2008.06.06	2008.4301	2008.429702	0							0	None	input	near met. site at Carreg Wen	no	no		no	7	Friday	66	10
1570	CR1570	CR	2008.06.06 17:00	2008.06.06 13:30	2008.06.06 10:00	2008.06.06 17:00	2008	6	6	17:00	2008.06.06	2008.430897	2008.430499	0							0	None	input	near met. site at Carreg Wen	no	no		no	14	Friday	66	11
1571	CR1571	CR	2008.06.07 00:00	2008.06.06 20:30	2008.06.06 17:00	2008.06.07 00:00	2008	6	7	00:00	2008.06.07	2008.431694	2008.431296	0							0	None	input	near met. site at Carreg Wen	no	no		no	21	Friday	66	12
1572	CR1572	CR	2008.06.07 07:00	2008.06.07 03:30	2008.06.07 00:00	2008.06.07 07:00	2008	6	7	07:00	2008.06.07	2008.432491	2008.432092	0							0	None	input	near met. site at Carreg Wen	no	no		no	28	Saturday	66	13
1573	CR1573	CR	2008.06.07 14:00	2008.06.07 08:30	2008.06.07 07:00	2008.06.07 14:00	2008	6	7	14:00	2008.06.07	2008.433288	2008.432662	0.07142857	-1.146128						0.5	None	input	near met. site at Carreg Wen	no	no		no	35	Saturday	66	14
1574	CR1574	CR	2008.06.07 21:00	2008.06.07 17:30	2008.06.07 14:00	2008.06.07 21:00	2008	6	7	21:00	2008.06.07	2008.434085	2008.433686	0							0	None	input	near met. site at Carreg Wen	no	no		no	42	Saturday	66	15
1575	CR1575	CR	2008.06.08 04:00	2008.06.08 00:30	2008.06.07 21:00	2008.06.08 04:00	2008	6	8	04:00	2008.06.08	2008.434882	2008.434483	0							0	None	input	near met. site at Carreg Wen	no	no		no	49	Saturday	66	16
1576	CR1576	CR	2008.06.08 11:00	2008.06.08 07:30	2008.06.08 04:00	2008.06.08 11:00	2008	6	8	11:00	2008.06.08	2008.435679	2008.43528	0							0	None	input	near met. site at Carreg Wen	no	no		no	56	Sunday	66	17
1577	CR1577	CR	2008.06.08 18:00	2008.06.08 14:30	2008.06.08 11:00	2008.06.08 18:00	2008	6	8	18:00	2008.06.08	2008.436475	2008.436077	0							0	None	input	near met. site at Carreg Wen	no	no		no	63	Sunday	66	18
1578	CR1578	CR	2008.06.09 01:00	2008.06.08 21:30	2008.06.08 18:00	2008.06.09 01:00	2008	6	9	01:00	2008.06.09	2008.437272	2008.436874	0							0	None	input	near met. site at Carreg Wen	no	no		no	70	Sunday	66	19
1579	CR1579	CR	2008.06.09 08:00	2008.06.09 04:30	2008.06.09 01:00	2008.06.09 08:00	2008	6	9	08:00	2008.06.09	2008.438069	2008.437671	0							0	None	input	near met. site at Carreg Wen	no	no		no	77	Monday	66	20
1580	CR1580	CR	2008.06.09 15:00	2008.06.09 11:30	2008.06.09 08:00	2008.06.09 15:00	2008	6	9	15:00	2008.06.09	2008.438866	2008.438468	0							0	None	input	near met. site at Carreg Wen	no	no		no	84	Monday	66	21
1581	CR1581	CR	2008.06.09 22:00	2008.06.09 18:30	2008.06.09 15:00	2008.06.09 22:00	2008	6	9	22:00	2008.06.09	2008.439663	2008.439265	0							0	None	input	near met. site at Carreg Wen	no	no		no	91	Monday	66	22
1582	CR1582	CR	2008.06.10 05:00	2008.06.10 01:30	2008.06.09 22:00	2008.06.10 05:00	2008	6	10	05:00	2008.06.10	2008.44046	2008.440062	0							0	None	input	near met. site at Carreg Wen	no	no		no	98	Monday	66	23
1583	CR1583	CR	2008.06.10 12:00	2008.06.10 08:30	2008.06.10 05:00	2008.06.10 12:00	2008	6	10	12:00	2008.06.10	2008.441257	2008.440858	0							0	None	input	near met. site at Carreg Wen	no	no		no	105	Tuesday	66	24
1584	CR1584	CR	2008.06.10 19:00	2008.06.10 15:30	2008.06.10 12:00	2008.06.10 19:00	2008	6	10	19:00	2008.06.10	2008.442054	2008.441655	0							0	None	input	near met. site at Carreg Wen	no	no		no	112	Tuesday	67	1
1585	CR1585	CR	2008.06.11 02:00	2008.06.10 22:30	2008.06.10 19:00	2008.06.11 02:00	2008	6	11	02:00	2008.06.11	2008.442851	2008.442452	0							0	None	input	near met. site at Carreg Wen	no	no		no	119	Tuesday	67	2
1586	CR1586	CR	2008.06.11 09:00	2008.06.11 05:30	2008.06.11 02:00	2008.06.11 09:00	2008	6	11	09:00	2008.06.11	2008.443648	2008.443249	0							0	None	input	near met. site at Carreg Wen	no	no		no	126	Wednesday	67	3
1587	CR1587	CR	2008.06.11 16:00	2008.06.11 12:30	2008.06.11 09:00	2008.06.11 16:00	2008	6	11	16:00	2008.06.11	2008.444444	2008.444046	0							0	None	input	near met. site at Carreg Wen	no	no		no	133	Wednesday	67	4
1588	CR1588	CR	2008.06.11 23:00	2008.06.11 20:47	2008.06.11 16:00	2008.06.11 23:00	2008	6	11	23:00	2008.06.11	2008.445241	2008.444989	0.5	-0.30103	79.4					3.5	None	input	near met. site at Carreg Wen	yes	no		yes	140	Wednesday	67	5			79.4
1589	CR1589	CR	2008.06.12 06:00	2008.06.12 01:00	2008.06.11 23:00	2008.06.12 06:00	2008	6	12	06:00	2008.06.12	2008.446038	2008.445469	0.14285714	-0.845098	5.78	-7.218	-49.025			1	None	input	near met. site at Carreg Wen	yes	yes	no	no	7	Wednesday	67	6	-7.218	-49.025	5.78
1590	CR1590	CR	2008.06.12 13:00	2008.06.12 09:30	2008.06.12 06:00	2008.06.12 13:00	2008	6	12	13:00	2008.06.12	2008.446835	2008.446437	0		7.22	-7.267	-47.44			0	None	input	near met. site at Carreg Wen	yes	yes	no	no	7	Thursday	67	7	-7.267	-47.44	7.22
1591	CR1591	CR	2008.06.12 20:00	2008.06.12 16:30	2008.06.12 13:00	2008.06.12 20:00	2008	6	12	20:00	2008.06.12	2008.447632	2008.447234	0							0	None	input	near met. site at Carreg Wen	no	no		no	7	Thursday	67	8
1592	CR1592	CR	2008.06.13 03:00	2008.06.12 23:30	2008.06.12 20:00	2008.06.13 03:00	2008	6	13	03:00	2008.06.13	2008.448429	2008.448031	0							0	None	input	near met. site at Carreg Wen	no	no		no	14	Thursday	67	9
1593	CR1593	CR	2008.06.13 10:00	2008.06.13 07:30	2008.06.13 03:00	2008.06.13 10:00	2008	6	13	10:00	2008.06.13	2008.449226	2008.448941	0.07142857	-1.146128						0.5	None	input	near met. site at Carreg Wen	no	no		no	21	Friday	67	10
1594	CR1594	CR	2008.06.13 17:00	2008.06.13 13:30	2008.06.13 10:00	2008.06.13 17:00	2008	6	13	17:00	2008.06.13	2008.450023	2008.449624	0		36.5					0	None	input	near met. site at Carreg Wen	yes	no		yes	28	Friday	67	11			36.5
1595	CR1595	CR	2008.06.14 00:00	2008.06.13 20:30	2008.06.13 17:00	2008.06.14 00:00	2008	6	14	00:00	2008.06.14	2008.45082	2008.450421	0							0	None	input	near met. site at Carreg Wen	no	no		no	7	Friday	67	12
1596	CR1596	CR	2008.06.14 07:00	2008.06.14 03:30	2008.06.14 00:00	2008.06.14 07:00	2008	6	14	07:00	2008.06.14	2008.451617	2008.451218	0							0	None	input	near met. site at Carreg Wen	no	no		no	14	Saturday	67	13
1597	CR1597	CR	2008.06.14 14:00	2008.06.14 10:30	2008.06.14 07:00	2008.06.14 14:00	2008	6	14	14:00	2008.06.14	2008.452414	2008.452015	0							0	None	input	near met. site at Carreg Wen	no	no		no	21	Saturday	67	14
1598	CR1598	CR	2008.06.14 21:00	2008.06.14 17:30	2008.06.14 14:00	2008.06.14 21:00	2008	6	14	21:00	2008.06.14	2008.45321	2008.452812	0							0	None	input	near met. site at Carreg Wen	no	no		no	28	Saturday	67	15
1599	CR1599	CR	2008.06.15 04:00	2008.06.15 00:30	2008.06.14 21:00	2008.06.15 04:00	2008	6	15	04:00	2008.06.15	2008.454007	2008.453609	0							0	None	input	near met. site at Carreg Wen	no	no		no	35	Saturday	67	16
1600	CR1600	CR	2008.06.15 11:00	2008.06.15 07:30	2008.06.15 04:00	2008.06.15 11:00	2008	6	15	11:00	2008.06.15	2008.454804	2008.454406	0							0	None	input	near met. site at Carreg Wen	no	no		no	42	Sunday	67	17
1601	CR1601	CR	2008.06.15 18:00	2008.06.15 14:30	2008.06.15 11:00	2008.06.15 18:00	2008	6	15	18:00	2008.06.15	2008.455601	2008.455203	0							0	None	input	near met. site at Carreg Wen	no	no		no	49	Sunday	67	18
1602	CR1602	CR	2008.06.16 01:00	2008.06.15 21:30	2008.06.15 18:00	2008.06.16 01:00	2008	6	16	01:00	2008.06.16	2008.456398	2008.456	0							0	None	input	near met. site at Carreg Wen	no	no		no	56	Sunday	67	19
1603	CR1603	CR	2008.06.16 08:00	2008.06.16 04:30	2008.06.16 01:00	2008.06.16 08:00	2008	6	16	08:00	2008.06.16	2008.457195	2008.456796	0							0	None	input	near met. site at Carreg Wen	no	no		no	63	Monday	67	20
1604	CR1604	CR	2008.06.16 15:00	2008.06.16 11:30	2008.06.16 08:00	2008.06.16 15:00	2008	6	16	15:00	2008.06.16	2008.457992	2008.457593	0							0	None	input	near met. site at Carreg Wen	no	no		no	70	Monday	67	21
1605	CR1605	CR	2008.06.16 22:00	2008.06.16 18:30	2008.06.16 15:00	2008.06.16 22:00	2008	6	16	22:00	2008.06.16	2008.458789	2008.45839	0							0	None	input	near met. site at Carreg Wen	no	no		no	77	Monday	67	22
1606	CR1606	CR	2008.06.17 05:00	2008.06.17 01:30	2008.06.16 22:00	2008.06.17 05:00	2008	6	17	05:00	2008.06.17	2008.459586	2008.459187	0							0	None	input	near met. site at Carreg Wen	no	no		no	84	Monday	67	23
1607	CR1607	CR	2008.06.17 12:00	2008.06.17 11:30	2008.06.17 05:00	2008.06.17 12:00	2008	6	17	12:00	2008.06.17	2008.460383	2008.460326	0.07142857	-1.146128						0.5	None	input	near met. site at Carreg Wen	no	no		no	91	Tuesday	67	24
1608	CR1608	CR	2008.06.17 19:00	2008.06.17 13:36	2008.06.17 12:00	2008.06.17 19:00	2008	6	17	19:00	2008.06.17	2008.461179	2008.460565	0.71428571	-0.146128	5.31	-3.006	-8.779			5	None	input	near met. site at Carreg Wen	yes	yes	no	no	98	Tuesday	68	1	-3.006	-8.779	5.31
1609	CR1609	CR	2008.06.18 02:00	2008.06.18 01:15	2008.06.17 19:00	2008.06.18 02:00	2008	6	18	02:00	2008.06.18	2008.461976	2008.461891	0.28571429	-0.544068						2	None	input	near met. site at Carreg Wen	no	no		no	7	Tuesday	68	2
1610	CR1610	CR	2008.06.18 09:00	2008.06.18 04:51	2008.06.18 02:00	2008.06.18 09:00	2008	6	18	09:00	2008.06.18	2008.462773	2008.462302	3	0.47712125	1.52	-8.359	-55.221			21	None	input	near met. site at Carreg Wen	yes	yes	no	no	14	Wednesday	68	3	-8.359	-55.221	1.52
1611	CR1611	CR	2008.06.18 16:00	2008.06.18 11:17	2008.06.18 09:00	2008.06.18 16:00	2008	6	18	16:00	2008.06.18	2008.46357	2008.463033	1	0	9.21	-3.923	-18.823			7	None	input	near met. site at Carreg Wen	yes	yes	no	no	7	Wednesday	68	4	-3.923	-18.823	9.21
1612	CR1612	CR	2008.06.18 23:00	2008.06.18 19:47	2008.06.18 16:00	2008.06.18 23:00	2008	6	18	23:00	2008.06.18	2008.464367	2008.464002	2.64285714	0.42207369	0.56	-4.073	-21.27			18.5	None	input	near met. site at Carreg Wen	yes	yes	no	no	7	Wednesday	68	5	-4.073	-21.27	0.56
1613	CR1613	CR	2008.06.19 06:00	2008.06.19 02:30	2008.06.18 23:00	2008.06.19 06:00	2008	6	19	06:00	2008.06.19	2008.465164	2008.464766	0							0	None	input	near met. site at Carreg Wen	no	no		no	7	Wednesday	68	6
1614	CR1614	CR	2008.06.19 13:00	2008.06.19 09:30	2008.06.19 06:00	2008.06.19 13:00	2008	6	19	13:00	2008.06.19	2008.465961	2008.465562	0							0	None	input	near met. site at Carreg Wen	no	no		no	14	Thursday	68	7
1615	CR1615	CR	2008.06.19 20:00	2008.06.19 16:30	2008.06.19 13:00	2008.06.19 20:00	2008	6	19	20:00	2008.06.19	2008.466758	2008.466359	0							0	None	input	near met. site at Carreg Wen	no	no		no	21	Thursday	68	8
1616	CR1616	CR	2008.06.20 03:00	2008.06.19 22:30	2008.06.19 20:00	2008.06.20 03:00	2008	6	20	03:00	2008.06.20	2008.467555	2008.467042	0.28571429	-0.544068	8.76	-4.798	-26.621			2	None	input	near met. site at Carreg Wen	yes	yes	no	no	28	Thursday	68	9	-4.798	-26.621	8.76
1617	CR1617	CR	2008.06.20 10:00	2008.06.20 06:30	2008.06.20 03:00	2008.06.20 10:00	2008	6	20	10:00	2008.06.20	2008.468352	2008.467953	0							0	None	input	near met. site at Carreg Wen	no	no		no	7	Friday	68	10
1618	CR1618	CR	2008.06.20 17:00	2008.06.20 13:30	2008.06.20 10:00	2008.06.20 17:00	2008	6	20	17:00	2008.06.20	2008.469149	2008.46875	0							0	None	input	near met. site at Carreg Wen	no	no		no	14	Friday	68	11
1619	CR1619	CR	2008.06.21 00:00	2008.06.20 20:30	2008.06.20 17:00	2008.06.21 00:00	2008	6	21	00:00	2008.06.21	2008.469945	2008.469547	0							0	None	input	near met. site at Carreg Wen	no	no		no	21	Friday	68	12
1620	CR1620	CR	2008.06.21 07:00	2008.06.21 05:36	2008.06.21 00:00	2008.06.21 07:00	2008	6	21	07:00	2008.06.21	2008.470742	2008.470583	1.42857143	0.15490196	0.97	-5.52	-32.607			10	None	input	near met. site at Carreg Wen	yes	yes	no	no	28	Saturday	68	13	-5.52	-32.607	0.97
1621	CR1621	CR	2008.06.21 14:00	2008.06.21 09:06	2008.06.21 07:00	2008.06.21 14:00	2008	6	21	14:00	2008.06.21	2008.471539	2008.470981	0.35714286	-0.447158	3.97	-4.242	-25.013			2.5	None	input	near met. site at Carreg Wen	yes	yes	no	no	7	Saturday	68	14	-4.242	-25.013	3.97
1622	CR1622	CR	2008.06.21 21:00	2008.06.21 18:33	2008.06.21 14:00	2008.06.21 21:00	2008	6	21	21:00	2008.06.21	2008.472336	2008.472059	1.14285714	0.05799195	0.71	-3.391	-17.371			8	None	input	near met. site at Carreg Wen	yes	yes	no	no	7	Saturday	68	15	-3.391	-17.371	0.71
1623	CR1623	CR	2008.06.22 04:00	2008.06.22 00:18	2008.06.21 21:00	2008.06.22 04:00	2008	6	22	04:00	2008.06.22	2008.473133	2008.472712	0.35714286	-0.447158	2.53	-3.717	-19.142			2.5	None	input	near met. site at Carreg Wen	yes	yes	no	no	7	Saturday	68	16	-3.717	-19.142	2.53
1624	CR1624	CR	2008.06.22 11:00	2008.06.22 07:30	2008.06.22 04:00	2008.06.22 11:00	2008	6	22	11:00	2008.06.22	2008.47393	2008.473531	0							0	None	input	near met. site at Carreg Wen	no	no		no	7	Sunday	68	17
1625	CR1625	CR	2008.06.22 18:00	2008.06.22 14:30	2008.06.22 11:00	2008.06.22 18:00	2008	6	22	18:00	2008.06.22	2008.474727	2008.474328	0							0	None	input	near met. site at Carreg Wen	no	no		no	14	Sunday	68	18
1626	CR1626	CR	2008.06.23 01:00	2008.06.22 21:30	2008.06.22 18:00	2008.06.23 01:00	2008	6	23	01:00	2008.06.23	2008.475524	2008.475125	0							0	None	input	near met. site at Carreg Wen	no	no		no	21	Sunday	68	19
1627	CR1627	CR	2008.06.23 08:00	2008.06.23 04:30	2008.06.23 01:00	2008.06.23 08:00	2008	6	23	08:00	2008.06.23	2008.476321	2008.475922	0							0	None	input	near met. site at Carreg Wen	no	no		no	28	Monday	68	20
1628	CR1628	CR	2008.06.23 15:00	2008.06.23 11:30	2008.06.23 08:00	2008.06.23 15:00	2008	6	23	15:00	2008.06.23	2008.477118	2008.476719	0							0	None	input	near met. site at Carreg Wen	no	no		no	35	Monday	68	21
1629	CR1629	CR	2008.06.23 22:00	2008.06.23 18:30	2008.06.23 15:00	2008.06.23 22:00	2008	6	23	22:00	2008.06.23	2008.477914	2008.477516	0							0	None	input	near met. site at Carreg Wen	no	no		no	42	Monday	68	22
1630	CR1630	CR	2008.06.24 05:00	2008.06.24 01:30	2008.06.23 22:00	2008.06.24 05:00	2008	6	24	05:00	2008.06.24	2008.478711	2008.478313	0							0	None	input	near met. site at Carreg Wen	no	no		no	49	Monday	68	23
1631	CR1631	CR	2008.06.24 12:00	2008.06.24 08:30	2008.06.24 05:00	2008.06.24 12:00	2008	6	24	12:00	2008.06.24	2008.479508	2008.47911	0							0	None	input	near met. site at Carreg Wen	no	no		no	56	Tuesday	68	24
1632	CR1632	CR	2008.06.24 19:00	2008.06.24 17:00	2008.06.24 12:00	2008.06.24 19:00	2008	6	24	19:00	2008.06.24	2008.480305	2008.480077	0.14285714	-0.845098	27.7	-4.319	-39.777			1	None	input	near met. site at Carreg Wen	yes	yes	no	yes	63	Tuesday	69	1	-4.319	-39.777	27.7
1633	CR1633	CR	2008.06.25 02:00	2008.06.24 22:30	2008.06.24 19:00	2008.06.25 02:00	2008	6	25	02:00	2008.06.25	2008.481102	2008.480704	0							0	None	input	near met. site at Carreg Wen	no	no		no	7	Tuesday	69	2
1634	CR1634	CR	2008.06.25 09:00	2008.06.25 05:47	2008.06.25 02:00	2008.06.25 09:00	2008	6	25	09:00	2008.06.25	2008.481899	2008.481533	0.5	-0.30103	12.3	-4.172	-25.369			3.5	None	input	near met. site at Carreg Wen	yes	yes	no	no	14	Wednesday	69	3	-4.172	-25.369	12.3
1635	CR1635	CR	2008.06.25 16:00	2008.06.25 12:30	2008.06.25 09:00	2008.06.25 16:00	2008	6	25	16:00	2008.06.25	2008.482696	2008.482297	0		12					0	None	input	near met. site at Carreg Wen	yes	no		no	7	Wednesday	69	4			12
1636	CR1636	CR	2008.06.25 23:00	2008.06.25 19:30	2008.06.25 16:00	2008.06.25 23:00	2008	6	25	23:00	2008.06.25	2008.483493	2008.483094	0							0	None	input	near met. site at Carreg Wen	no	no		no	7	Wednesday	69	5
1637	CR1637	CR	2008.06.26 06:00	2008.06.26 02:30	2008.06.25 23:00	2008.06.26 06:00	2008	6	26	06:00	2008.06.26	2008.48429	2008.483891	0							0	None	input	near met. site at Carreg Wen	no	no		no	14	Wednesday	69	6
1638	CR1638	CR	2008.06.26 13:00	2008.06.26 10:31	2008.06.26 06:00	2008.06.26 13:00	2008	6	26	13:00	2008.06.26	2008.485087	2008.484805	2.5	0.39794001	3.29	-5.05	-27.937			17.5	None	input	near met. site at Carreg Wen	yes	yes	no	no	21	Thursday	69	7	-5.05	-27.937	3.29
1639	CR1639	CR	2008.06.26 20:00	2008.06.26 16:29	2008.06.26 13:00	2008.06.26 20:00	2008	6	26	20:00	2008.06.26	2008.485883	2008.485484	5.85714286	0.76768582	14.2	-4.951	-30.381			41	None	input	near met. site at Carreg Wen	yes	yes	no	yes	7	Thursday	69	8	-4.951	-30.381	14.2
1640	CR1640	CR	2008.06.27 03:00	2008.06.26 23:30	2008.06.26 20:00	2008.06.27 03:00	2008	6	27	03:00	2008.06.27	2008.48668	2008.486282	0							0	None	input	near met. site at Carreg Wen	no	no		no	7	Thursday	69	9
1641	CR1641	CR	2008.06.27 10:00	2008.06.27 08:50	2008.06.27 03:00	2008.06.27 10:00	2008	6	27	10:00	2008.06.27	2008.487477	2008.487344	0.42857143	-0.3679768	5.19	-7.15	-47.712			3	None	input	near met. site at Carreg Wen	yes	yes	no	no	14	Friday	69	10	-7.15	-47.712	5.19
1642	CR1642	CR	2008.06.27 17:00	2008.06.27 12:35	2008.06.27 10:00	2008.06.27 17:00	2008	6	27	17:00	2008.06.27	2008.488274	2008.487772	1.57142857	0.19629465	4.27	-2.861	-16.882			11	None	input	near met. site at Carreg Wen	yes	yes	no	no	7	Friday	69	11	-2.861	-16.882	4.27
1643	CR1643	CR	2008.06.28 00:00	2008.06.27 22:50	2008.06.27 17:00	2008.06.28 00:00	2008	6	28	00:00	2008.06.28	2008.489071	2008.488938	0.21428571	-0.6690068	14.3	-2.67	-14.442			1.5	None	input	near met. site at Carreg Wen	yes	yes	no	no	7	Friday	69	12	-2.67	-14.442	14.3
1644	CR1644	CR	2008.06.28 07:00	2008.06.28 01:30	2008.06.28 00:00	2008.06.28 07:00	2008	6	28	07:00	2008.06.28	2008.489868	2008.489242	0.07142857	-1.146128	10.8	-1.73	-8.18			0.5	None	input	near met. site at Carreg Wen	yes	yes	no	no	7	Saturday	69	13	-1.73	-8.18	10.8
1645	CR1645	CR	2008.06.28 14:00	2008.06.28 12:30	2008.06.28 07:00	2008.06.28 14:00	2008	6	28	14:00	2008.06.28	2008.490665	2008.490494	0.07142857	-1.146128						0.5	None	input	near met. site at Carreg Wen	no	no		no	7	Saturday	69	14
1646	CR1646	CR	2008.06.28 21:00	2008.06.28 17:30	2008.06.28 14:00	2008.06.28 21:00	2008	6	28	21:00	2008.06.28	2008.491462	2008.491063	0							0	None	input	near met. site at Carreg Wen	no	no		no	14	Saturday	69	15
1647	CR1647	CR	2008.06.29 04:00	2008.06.29 02:30	2008.06.28 21:00	2008.06.29 04:00	2008	6	29	04:00	2008.06.29	2008.492259	2008.492088	0.14285714	-0.845098	13.2					1	None	input	near met. site at Carreg Wen	yes	no		no	21	Saturday	69	16			13.2
1648	CR1648	CR	2008.06.29 11:00	2008.06.29 08:40	2008.06.29 04:00	2008.06.29 11:00	2008	6	29	11:00	2008.06.29	2008.493056	2008.492791	1.21428571	0.08432089	5.02	-3.438	-18.755			8.5	None	input	near met. site at Carreg Wen	yes	yes	no	no	7	Sunday	69	17	-3.438	-18.755	5.02
1649	CR1649	CR	2008.06.29 18:00	2008.06.29 11:30	2008.06.29 11:00	2008.06.29 18:00	2008	6	29	18:00	2008.06.29	2008.493853	2008.493113	0.07142857	-1.146128	2.04	-5.873	-35.449			0.5	None	input	near met. site at Carreg Wen	yes	yes	no	no	7	Sunday	69	18	-5.873	-35.449	2.04
1650	CR1650	CR	2008.06.30 01:00	2008.06.29 21:30	2008.06.29 18:00	2008.06.30 01:00	2008	6	30	01:00	2008.06.30	2008.494649	2008.494251	0							0	None	input	near met. site at Carreg Wen	no	no		no	7	Sunday	69	19
1651	CR1651	CR	2008.06.30 08:00	2008.06.30 04:30	2008.06.30 01:00	2008.06.30 08:00	2008	6	30	08:00	2008.06.30	2008.495446	2008.495048	0							0	None	input	near met. site at Carreg Wen	no	no		no	14	Monday	69	20
1652	CR1652	CR	2008.06.30 15:00	2008.06.30 08:30	2008.06.30 08:00	2008.06.30 15:00	2008	6	30	15:00	2008.06.30	2008.496243	2008.495503	0.07142857	-1.146128						0.5	None	input	near met. site at Carreg Wen	no	no		no	21	Monday	69	21
1653	CR1653	CR	2008.06.30 22:00	2008.06.30 18:30	2008.06.30 15:00	2008.06.30 22:00	2008	6	30	22:00	2008.06.30	2008.49704	2008.496642	0							0	None	input	near met. site at Carreg Wen	no	no		no	28	Monday	69	22
1654	CR1654	CR	2008.07.01 05:00	2008.07.01 01:30	2008.06.30 22:00	2008.07.01 05:00	2008	7	1	05:00	2008.07.01	2008.497837	2008.497439	0							0	None	input	near met. site at Carreg Wen	no	no		no	35	Monday	69	23
1655	CR1655	CR	2008.07.01 12:00	2008.07.01 08:30	2008.07.01 05:00	2008.07.01 12:00	2008	7	1	12:00	2008.07.01	2008.498634	2008.498235	0							0	None	input	near met. site at Carreg Wen	no	no		no	42	Tuesday	69	24
1656	CR1656	CR	2008.07.01 19:00	2008.07.01 17:38	2008.07.01 12:00	2008.07.01 19:00	2008	7	1	19:00	2008.07.01	2008.499431	2008.499276	0.5	-0.30103	2.59	-6.019	-35.094			3.5	None	input	near met. site at Carreg Wen	yes	yes	no	no	49	Tuesday	70	1	-6.019	-35.094	2.59
1657	CR1657	CR	2008.07.02 02:00	2008.07.01 20:30	2008.07.01 19:00	2008.07.02 02:00	2008	7	2	02:00	2008.07.02	2008.500228	2008.499602	0.21428571	-0.6690068	2.36	-7.077	-47.399			1.5	None	input	near met. site at Carreg Wen	yes	yes	no	no	7	Tuesday	70	2	-7.077	-47.399	2.36
1658	CR1658	CR	2008.07.02 09:00	2008.07.02 05:30	2008.07.02 02:00	2008.07.02 09:00	2008	7	2	09:00	2008.07.02	2008.501025	2008.500626	0							0	None	input	near met. site at Carreg Wen	no	no		no	7	Wednesday	70	3
1659	CR1659	CR	2008.07.02 16:00	2008.07.02 12:45	2008.07.02 09:00	2008.07.02 16:00	2008	7	2	16:00	2008.07.02	2008.501822	2008.501452	0.85714286	-0.0669468	1.41	-6.472	-38.657			6	None	input	near met. site at Carreg Wen	yes	yes	no	no	14	Wednesday	70	4	-6.472	-38.657	1.41
1660	CR1660	CR	2008.07.02 23:00	2008.07.02 17:50	2008.07.02 16:00	2008.07.02 23:00	2008	7	2	23:00	2008.07.02	2008.502618	2008.50203	0.64285714	-0.1918855	4	-5.435	-27.634			4.5	None	input	near met. site at Carreg Wen	yes	yes	no	no	7	Wednesday	70	5	-5.435	-27.634	4
1661	CR1661	CR	2008.07.03 06:00	2008.07.03 04:04	2008.07.02 23:00	2008.07.03 06:00	2008	7	3	06:00	2008.07.03	2008.503415	2008.503196	0.5	-0.30103	4.15	-5.636	-28.407			3.5	None	input	near met. site at Carreg Wen	yes	yes	no	no	7	Wednesday	70	6	-5.636	-28.407	4.15
1662	CR1662	CR	2008.07.03 13:00	2008.07.03 09:50	2008.07.03 06:00	2008.07.03 13:00	2008	7	3	13:00	2008.07.03	2008.504212	2008.503852	0.21428571	-0.6690068	0.85	-8.48	-54.48			1.5	None	input	near met. site at Carreg Wen	yes	yes	no	no	7	Thursday	70	7	-8.48	-54.48	0.85
1663	CR1663	CR	2008.07.03 20:00	2008.07.03 16:30	2008.07.03 13:00	2008.07.03 20:00	2008	7	3	20:00	2008.07.03	2008.505009	2008.504611	0							0	None	input	near met. site at Carreg Wen	no	no		no	7	Thursday	70	8
1664	CR1664	CR	2008.07.04 03:00	2008.07.03 23:30	2008.07.03 20:00	2008.07.04 03:00	2008	7	4	03:00	2008.07.04	2008.505806	2008.505408	0		3.97	-8.156	-48.995			0	None	input	near met. site at Carreg Wen	yes	yes	no	no	14	Thursday	70	9	-8.156	-48.995	3.97
1665	CR1665	CR	2008.07.04 10:00	2008.07.04 06:30	2008.07.04 03:00	2008.07.04 10:00	2008	7	4	10:00	2008.07.04	2008.506603	2008.506205	0							0	None	input	near met. site at Carreg Wen	no	no		no	7	Friday	70	10
1666	CR1666	CR	2008.07.04 17:00	2008.07.04 16:30	2008.07.04 10:00	2008.07.04 17:00	2008	7	4	17:00	2008.07.04	2008.5074	2008.507343	0.07142857	-1.146128						0.5	None	input	near met. site at Carreg Wen	no	no		no	14	Friday	70	11
1667	CR1667	CR	2008.07.05 00:00	2008.07.04 22:10	2008.07.04 17:00	2008.07.05 00:00	2008	7	5	00:00	2008.07.05	2008.508197	2008.507988	0.21428571	-0.6690068	4.2	-3.786	-24.142			1.5	None	input	near met. site at Carreg Wen	yes	yes	no	no	21	Friday	70	12	-3.786	-24.142	4.2
1668	CR1668	CR	2008.07.05 07:00	2008.07.05 04:24	2008.07.05 00:00	2008.07.05 07:00	2008	7	5	07:00	2008.07.05	2008.508994	2008.508699	0.78571429	-0.1047354	1.11	-4.603	-21.83			5.5	None	input	near met. site at Carreg Wen	yes	yes	no	no	7	Saturday	70	13	-4.603	-21.83	1.11
1669	CR1669	CR	2008.07.05 14:00	2008.07.05 11:15	2008.07.05 07:00	2008.07.05 14:00	2008	7	5	14:00	2008.07.05	2008.509791	2008.509478	0.28571429	-0.544068	2.18	-7.299	-47.393			2	None	input	near met. site at Carreg Wen	yes	yes	no	no	7	Saturday	70	14	-7.299	-47.393	2.18
1670	CR1670	CR	2008.07.05 21:00	2008.07.05 16:18	2008.07.05 14:00	2008.07.05 21:00	2008	7	5	21:00	2008.07.05	2008.510587	2008.510052	0.35714286	-0.447158	5.02	-5.475	-34.113			2.5	None	input	near met. site at Carreg Wen	yes	yes	no	no	7	Saturday	70	15	-5.475	-34.113	5.02
1671	CR1671	CR	2008.07.06 04:00	2008.07.06 02:00	2008.07.05 21:00	2008.07.06 04:00	2008	7	6	04:00	2008.07.06	2008.511384	2008.511157	0.42857143	-0.3679768	0.89	-10.87	-80.585			3	None	input	near met. site at Carreg Wen	yes	yes	no	no	7	Saturday	70	16	-10.87	-80.585	0.89
1672	CR1672	CR	2008.07.06 11:00	2008.07.06 08:27	2008.07.06 04:00	2008.07.06 11:00	2008	7	6	11:00	2008.07.06	2008.512181	2008.511892	1.57142857	0.19629465	0.1	-9.35	-66.784			11	None	input	near met. site at Carreg Wen	yes	yes	no	no	7	Sunday	70	17	-9.35	-66.784	0.1
1673	CR1673	CR	2008.07.06 18:00	2008.07.06 17:18	2008.07.06 11:00	2008.07.06 18:00	2008	7	6	18:00	2008.07.06	2008.512978	2008.512899	2.57142857	0.41017447	1.42	-5.905	-39.64			18	None	input	near met. site at Carreg Wen	yes	yes	no	no	7	Sunday	70	18	-5.905	-39.64	1.42
1674	CR1674	CR	2008.07.07 01:00	2008.07.06 18:57	2008.07.06 18:00	2008.07.07 01:00	2008	7	7	01:00	2008.07.07	2008.513775	2008.513088	0.92857143	-0.0321847	0.94	-7.57	-48.859			6.5	None	input	near met. site at Carreg Wen	yes	yes	no	no	7	Sunday	70	19	-7.57	-48.859	0.94
1675	CR1675	CR	2008.07.07 08:00	2008.07.07 02:20	2008.07.07 01:00	2008.07.07 08:00	2008	7	7	08:00	2008.07.07	2008.514572	2008.513927	0.42857143	-0.3679768	1.34	-7.874	-53.881			3	None	input	near met. site at Carreg Wen	yes	yes	no	no	7	Monday	70	20	-7.874	-53.881	1.34
1676	CR1676	CR	2008.07.07 15:00	2008.07.07 11:10	2008.07.07 08:00	2008.07.07 15:00	2008	7	7	15:00	2008.07.07	2008.515369	2008.514933	0.21428571	-0.6690068	1.71	-6.112	-41.446			1.5	None	input	near met. site at Carreg Wen	yes	yes	no	no	7	Monday	70	21	-6.112	-41.446	1.71
1677	CR1677	CR	2008.07.07 22:00	2008.07.07 18:30	2008.07.07 15:00	2008.07.07 22:00	2008	7	7	22:00	2008.07.07	2008.516166	2008.515767	0							0	None	input	near met. site at Carreg Wen	no	no		no	7	Monday	70	22
1678	CR1678	CR	2008.07.08 05:00	2008.07.08 01:04	2008.07.07 22:00	2008.07.08 05:00	2008	7	8	05:00	2008.07.08	2008.516963	2008.516515	0.5	-0.30103	5.45	-6.816	-38.806			3.5	None	input	near met. site at Carreg Wen	yes	yes	no	no	14	Monday	70	23	-6.816	-38.806	5.45
1679	CR1679	CR	2008.07.08 12:00	2008.07.08 09:30	2008.07.08 05:00	2008.07.08 12:00	2008	7	8	12:00	2008.07.08	2008.51776	2008.517475	0.07142857	-1.146128						0.5	None	input	near met. site at Carreg Wen	no	no		no	7	Tuesday	70	24
1680	CR1680	CR	2008.07.08 19:00	2008.07.08 15:30	2008.07.08 12:00	2008.07.08 19:00	2008	7	8	19:00	2008.07.08	2008.518557	2008.518158	0							0	None	input	near met. site at Carreg Wen	no	no		no	14	Tuesday	71	1
1681	CR1681	CR	2008.07.09 02:00	2008.07.08 22:30	2008.07.08 19:00	2008.07.09 02:00	2008	7	9	02:00	2008.07.09	2008.519353	2008.518955	0							0	None	input	near met. site at Carreg Wen	no	no		no	21	Tuesday	71	2
1682	CR1682	CR	2008.07.09 09:00	2008.07.09 05:45	2008.07.09 02:00	2008.07.09 09:00	2008	7	9	09:00	2008.07.09	2008.52015	2008.51978	1.14285714	0.05799195	2.28	-10.094	-71.133			8	None	input	near met. site at Carreg Wen	yes	yes	no	no	28	Wednesday	71	3	-10.094	-71.133	2.28
1683	CR1683	CR	2008.07.09 16:00	2008.07.09 11:30	2008.07.09 09:00	2008.07.09 16:00	2008	7	9	16:00	2008.07.09	2008.520947	2008.520435	1.14285714	0.05799195	1.76	-10.751	-79.717			8	None	input	near met. site at Carreg Wen	yes	yes	no	no	7	Wednesday	71	4	-10.751	-79.717	1.76
1684	CR1684	CR	2008.07.09 23:00	2008.07.09 18:16	2008.07.09 16:00	2008.07.09 23:00	2008	7	9	23:00	2008.07.09	2008.521744	2008.521207	1.64285714	0.2155998	1.58	-5.766	-39.329			11.5	None	input	near met. site at Carreg Wen	yes	yes	no	no	7	Wednesday	71	5	-5.766	-39.329	1.58
1685	CR1685	CR	2008.07.10 06:00	2008.07.10 00:30	2008.07.09 23:00	2008.07.10 06:00	2008	7	10	06:00	2008.07.10	2008.522541	2008.521915	0.07142857	-1.146128						0.5	None	input	near met. site at Carreg Wen	no	no		no	7	Wednesday	71	6
1686	CR1686	CR	2008.07.10 13:00	2008.07.10 10:55	2008.07.10 06:00	2008.07.10 13:00	2008	7	10	13:00	2008.07.10	2008.523338	2008.523102	1	0	3.47	-6.079	-39.521			7	None	input	near met. site at Carreg Wen	yes	yes	no	no	14	Thursday	71	7	-6.079	-39.521	3.47
1687	CR1687	CR	2008.07.10 20:00	2008.07.10 16:58	2008.07.10 13:00	2008.07.10 20:00	2008	7	10	20:00	2008.07.10	2008.524135	2008.52379	1.21428571	0.08432089	1.34	-6.064	-41.754			8.5	None	input	near met. site at Carreg Wen	yes	yes	no	no	7	Thursday	71	8	-6.064	-41.754	1.34
1688	CR1688	CR	2008.07.11 03:00	2008.07.11 01:30	2008.07.10 20:00	2008.07.11 03:00	2008	7	11	03:00	2008.07.11	2008.524932	2008.524761	0.07142857	-1.146128						0.5	None	input	near met. site at Carreg Wen	no	no		no	7	Thursday	71	9
1689	CR1689	CR	2008.07.11 10:00	2008.07.11 05:43	2008.07.11 03:00	2008.07.11 10:00	2008	7	11	10:00	2008.07.11	2008.525729	2008.525243	0.92857143	-0.0321847	0.72	-10.794	-76.29			6.5	None	input	near met. site at Carreg Wen	yes	yes	no	no	14	Friday	71	10	-10.794	-76.29	0.72
1690	CR1690	CR	2008.07.11 17:00	2008.07.11 12:00	2008.07.11 10:00	2008.07.11 17:00	2008	7	11	17:00	2008.07.11	2008.526526	2008.525956	0.42857143	-0.3679768	0.87	-10.211	-75.345			3	None	input	near met. site at Carreg Wen	yes	yes	no	no	7	Friday	71	11	-10.211	-75.345	0.87
1691	CR1691	CR	2008.07.12 00:00	2008.07.11 20:30	2008.07.11 17:00	2008.07.12 00:00	2008	7	12	00:00	2008.07.12	2008.527322	2008.526924	0							0	None	input	near met. site at Carreg Wen	no	no		no	7	Friday	71	12
1692	CR1692	CR	2008.07.12 07:00	2008.07.12 03:30	2008.07.12 00:00	2008.07.12 07:00	2008	7	12	07:00	2008.07.12	2008.528119	2008.527721	0.35714286	-0.447158	5.73	-7.223	-44.237			2.5	None	input	near met. site at Carreg Wen	yes	yes	no	no	14	Saturday	71	13	-7.223	-44.237	5.73
1693	CR1693	CR	2008.07.12 14:00	2008.07.12 09:55	2008.07.12 07:00	2008.07.12 14:00	2008	7	12	14:00	2008.07.12	2008.528916	2008.528453	0.5	-0.30103	3.55	-5.918	-34.008			3.5	None	input	near met. site at Carreg Wen	yes	yes	no	no	7	Saturday	71	14	-5.918	-34.008	3.55
1694	CR1694	CR	2008.07.12 21:00	2008.07.12 18:30	2008.07.12 14:00	2008.07.12 21:00	2008	7	12	21:00	2008.07.12	2008.529713	2008.529429	0.28571429	-0.544068	2.2	-4.713	-23.178			2	None	input	near met. site at Carreg Wen	yes	yes	no	no	7	Saturday	71	15	-4.713	-23.178	2.2
1695	CR1695	CR	2008.07.13 04:00	2008.07.13 00:30	2008.07.12 21:00	2008.07.13 04:00	2008	7	13	04:00	2008.07.13	2008.53051	2008.530112	0		6.41	-4.471	-21.242			0	None	input	near met. site at Carreg Wen	yes	yes	no	no	7	Saturday	71	16	-4.471	-21.242	6.41
1696	CR1696	CR	2008.07.13 11:00	2008.07.13 07:30	2008.07.13 04:00	2008.07.13 11:00	2008	7	13	11:00	2008.07.13	2008.531307	2008.530909	0							0	None	input	near met. site at Carreg Wen	no	no		no	7	Sunday	71	17
1697	CR1697	CR	2008.07.13 18:00	2008.07.13 14:30	2008.07.13 11:00	2008.07.13 18:00	2008	7	13	18:00	2008.07.13	2008.532104	2008.531705	0							0	None	input	near met. site at Carreg Wen	no	no		no	14	Sunday	71	18
1698	CR1698	CR	2008.07.14 01:00	2008.07.13 21:30	2008.07.13 18:00	2008.07.14 01:00	2008	7	14	01:00	2008.07.14	2008.532901	2008.532502	0							0	None	input	near met. site at Carreg Wen	no	no		no	21	Sunday	71	19
1699	CR1699	CR	2008.07.14 08:00	2008.07.14 03:30	2008.07.14 01:00	2008.07.14 08:00	2008	7	14	08:00	2008.07.14	2008.533698	2008.533185	0.07142857	-1.146128						0.5	None	input	near met. site at Carreg Wen	no	no		no	28	Monday	71	20
1700	CR1700	CR	2008.07.14 15:00	2008.07.14 11:30	2008.07.14 08:00	2008.07.14 15:00	2008	7	14	15:00	2008.07.14	2008.534495	2008.534096	0							0	None	input	near met. site at Carreg Wen	no	no		no	35	Monday	71	21
1701	CR1701	CR	2008.07.14 22:00	2008.07.14 18:30	2008.07.14 15:00	2008.07.14 22:00	2008	7	14	22:00	2008.07.14	2008.535291	2008.534893	0							0	None	input	near met. site at Carreg Wen	no	no		no	42	Monday	71	22
1702	CR1702	CR	2008.07.15 05:00	2008.07.15 01:30	2008.07.14 22:00	2008.07.15 05:00	2008	7	15	05:00	2008.07.15	2008.536088	2008.53569	0.07142857	-1.146128						0.5	None	input	near met. site at Carreg Wen	no	no		no	49	Monday	71	23
1703	CR1703	CR	2008.07.15 12:00	2008.07.15 08:30	2008.07.15 05:00	2008.07.15 12:00	2008	7	15	12:00	2008.07.15	2008.536885	2008.536487	0							0	None	input	near met. site at Carreg Wen	no	no		no	56	Tuesday	71	24
1704	CR1704	CR	2008.07.15 19:00	2008.07.15 13:30	2008.07.15 12:00	2008.07.15 19:00	2008	7	15	19:00	2008.07.15	2008.537682	2008.537056	0.07142857	-1.146128	5.59	-1.32	-4.936			0.5	None	input	near met. site at Carreg Wen	yes	yes	no	no	63	Tuesday	72	1	-1.32	-4.936	5.59
1705	CR1705	CR	2008.07.16 02:00	2008.07.15 22:30	2008.07.15 19:00	2008.07.16 02:00	2008	7	16	02:00	2008.07.16	2008.538479	2008.538081	0							0	None	input	near met. site at Carreg Wen	no	no		no	7	Tuesday	72	2
1706	CR1706	CR	2008.07.16 09:00	2008.07.16 05:30	2008.07.16 02:00	2008.07.16 09:00	2008	7	16	09:00	2008.07.16	2008.539276	2008.538878	0							0	None	input	near met. site at Carreg Wen	no	no		no	14	Wednesday	72	3
1707	CR1707	CR	2008.07.16 16:00	2008.07.16 12:30	2008.07.16 09:00	2008.07.16 16:00	2008	7	16	16:00	2008.07.16	2008.540073	2008.539674	0		35.1					0	3/4 full	input	near met. site at Carreg Wen	yes	no		yes	21	Wednesday	72	4			35.1
1708	CR1708	CR	2008.07.16 23:00	2008.07.16 18:00	2008.07.16 16:00	2008.07.16 23:00	2008	7	16	23:00	2008.07.16	2008.54087	2008.540301	0.14285714	-0.845098	8.98	-6.208	-36.553			1	None	input	near met. site at Carreg Wen	yes	yes	no	no	7	Wednesday	72	5	-6.208	-36.553	8.98
1709	CR1709	CR	2008.07.17 06:00	2008.07.17 02:52	2008.07.16 23:00	2008.07.17 06:00	2008	7	17	06:00	2008.07.17	2008.541667	2008.541311	0.57142857	-0.243038	4.33	-5.89	-33.29			4	None	input	near met. site at Carreg Wen	yes	yes	no	no	7	Wednesday	72	6	-5.89	-33.29	4.33
1710	CR1710	CR	2008.07.17 13:00	2008.07.17 10:11	2008.07.17 06:00	2008.07.17 13:00	2008	7	17	13:00	2008.07.17	2008.542464	2008.542143	1.35714286	0.13262557	2.79	-5.485	-29.692			9.5	None	input	near met. site at Carreg Wen	yes	yes	no	no	7	Thursday	72	7	-5.485	-29.692	2.79
1711	CR1711	CR	2008.07.17 20:00	2008.07.17 15:37	2008.07.17 13:00	2008.07.17 20:00	2008	7	17	20:00	2008.07.17	2008.543261	2008.542762	1.21428571	0.08432089	2.33	-5.507	-29.26			8.5	None	input	near met. site at Carreg Wen	yes	yes	no	no	7	Thursday	72	8	-5.507	-29.26	2.33
1712	CR1712	CR	2008.07.18 03:00	2008.07.18 00:30	2008.07.17 20:00	2008.07.18 03:00	2008	7	18	03:00	2008.07.18	2008.544057	2008.543773	0.07142857	-1.146128	14.5					0.5	None	input	near met. site at Carreg Wen	yes	no		no	7	Thursday	72	9			14.5
1713	CR1713	CR	2008.07.18 10:00	2008.07.18 07:01	2008.07.18 03:00	2008.07.18 10:00	2008	7	18	10:00	2008.07.18	2008.544854	2008.544516	1.35714286	0.13262557	2.66	-3.398	-17.368			9.5	None	input	near met. site at Carreg Wen	yes	yes	no	no	7	Friday	72	10	-3.398	-17.368	2.66
1714	CR1714	CR	2008.07.18 17:00	2008.07.18 12:11	2008.07.18 10:00	2008.07.18 17:00	2008	7	18	17:00	2008.07.18	2008.545651	2008.545103	1.35714286	0.13262557	3.56	-4.268	-26.007			9.5	None	input	near met. site at Carreg Wen	yes	yes	no	no	7	Friday	72	11	-4.268	-26.007	3.56
1715	CR1715	CR	2008.07.19 00:00	2008.07.18 21:23	2008.07.18 17:00	2008.07.19 00:00	2008	7	19	00:00	2008.07.19	2008.546448	2008.546151	0.64285714	-0.1918855	2.36	-6.861	-43.068			4.5	None	input	near met. site at Carreg Wen	yes	yes	no	no	7	Friday	72	12	-6.861	-43.068	2.36
1716	CR1716	CR	2008.07.19 07:00	2008.07.19 01:30	2008.07.19 00:00	2008.07.19 07:00	2008	7	19	07:00	2008.07.19	2008.547245	2008.546619	0.14285714	-0.845098	5.76	-6.854	-45.223			1	None	input	near met. site at Carreg Wen	yes	yes	no	no	7	Saturday	72	13	-6.854	-45.223	5.76
1717	CR1717	CR	2008.07.19 14:00	2008.07.19 10:45	2008.07.19 07:00	2008.07.19 14:00	2008	7	19	14:00	2008.07.19	2008.548042	2008.547672	0.28571429	-0.544068	7.91	-6.569	-42.316			2	None	input	near met. site at Carreg Wen	yes	yes	no	no	7	Saturday	72	14	-6.569	-42.316	7.91
1718	CR1718	CR	2008.07.19 21:00	2008.07.19 17:30	2008.07.19 14:00	2008.07.19 21:00	2008	7	19	21:00	2008.07.19	2008.548839	2008.54844	0							0	None	input	near met. site at Carreg Wen	no	no		no	7	Saturday	72	15
1719	CR1719	CR	2008.07.20 04:00	2008.07.20 00:30	2008.07.19 21:00	2008.07.20 04:00	2008	7	20	04:00	2008.07.20	2008.549636	2008.549237	0.07142857	-1.146128						0.5	None	input	near met. site at Carreg Wen	no	no		no	14	Saturday	72	16
1720	CR1720	CR	2008.07.20 11:00	2008.07.20 07:30	2008.07.20 04:00	2008.07.20 11:00	2008	7	20	11:00	2008.07.20	2008.550433	2008.550034	0							0	1/2 full	input	near met. site at Carreg Wen	yes	no		no	21	Sunday	72	17
1721	CR1721	CR	2008.07.20 18:00	2008.07.20 14:30	2008.07.20 11:00	2008.07.20 18:00	2008	7	20	18:00	2008.07.20	2008.55123	2008.550831	0							0	None	input	near met. site at Carreg Wen	no	no		no	7	Sunday	72	18
1722	CR1722	CR	2008.07.21 01:00	2008.07.20 21:30	2008.07.20 18:00	2008.07.21 01:00	2008	7	21	01:00	2008.07.21	2008.552026	2008.551628	0							0	None	input	near met. site at Carreg Wen	no	no		no	14	Sunday	72	19
1723	CR1723	CR	2008.07.21 08:00	2008.07.21 04:30	2008.07.21 01:00	2008.07.21 08:00	2008	7	21	08:00	2008.07.21	2008.552823	2008.552425	0							0	None	input	near met. site at Carreg Wen	no	no		no	21	Monday	72	20
1724	CR1724	CR	2008.07.21 15:00	2008.07.21 11:30	2008.07.21 08:00	2008.07.21 15:00	2008	7	21	15:00	2008.07.21	2008.55362	2008.553222	0							0	None	input	near met. site at Carreg Wen	no	no		no	28	Monday	72	21
1725	CR1725	CR	2008.07.21 22:00	2008.07.21 18:30	2008.07.21 15:00	2008.07.21 22:00	2008	7	21	22:00	2008.07.21	2008.554417	2008.554019	0							0	None	input	near met. site at Carreg Wen	no	no		no	35	Monday	72	22
1726	CR1726	CR	2008.07.22 05:00	2008.07.22 01:30	2008.07.21 22:00	2008.07.22 05:00	2008	7	22	05:00	2008.07.22	2008.555214	2008.554816	0		34					0	None	input	near met. site at Carreg Wen	yes	no		yes	42	Monday	72	23			34
1727	CR1727	CR	2008.07.22 12:00	2008.07.22 08:30	2008.07.22 05:00	2008.07.22 12:00	2008	7	22	12:00	2008.07.22	2008.556011	2008.555613	0							0	trace sample	input	near met. site at Carreg Wen	no	no		no	7	Tuesday	72	24
1728	CR1728	CR	2008.07.22 19:00	2008.07.22 15:30	2008.07.22 12:00	2008.07.22 19:00	2008	7	22	19:00	2008.07.22	2008.556808	2008.556409	0							0	None	input	near met. site at Carreg Wen	no	no		no	14	Tuesday	73	1
1729	CR1729	CR	2008.07.23 02:00	2008.07.22 22:30	2008.07.22 19:00	2008.07.23 02:00	2008	7	23	02:00	2008.07.23	2008.557605	2008.557206	0							0	None	input	near met. site at Carreg Wen	no	no		no	21	Tuesday	73	2
1730	CR1730	CR	2008.07.23 09:00	2008.07.23 02:30	2008.07.23 02:00	2008.07.23 09:00	2008	7	23	09:00	2008.07.23	2008.558402	2008.557662	0.07142857	-1.146128						0.5	None	input	near met. site at Carreg Wen	no	no		no	28	Wednesday	73	3
1731	CR1731	CR	2008.07.23 16:00	2008.07.23 12:30	2008.07.23 09:00	2008.07.23 16:00	2008	7	23	16:00	2008.07.23	2008.559199	2008.5588	0							0	None	input	near met. site at Carreg Wen	no	no		no	35	Wednesday	73	4
1732	CR1732	CR	2008.07.23 23:00	2008.07.23 19:30	2008.07.23 16:00	2008.07.23 23:00	2008	7	23	23:00	2008.07.23	2008.559995	2008.559597	0							0	None	input	near met. site at Carreg Wen	no	no		no	42	Wednesday	73	5
1733	CR1733	CR	2008.07.24 06:00	2008.07.24 02:30	2008.07.23 23:00	2008.07.24 06:00	2008	7	24	06:00	2008.07.24	2008.560792	2008.560394	0							0	None	input	near met. site at Carreg Wen	no	no		no	49	Wednesday	73	6
1734	CR1734	CR	2008.07.24 13:00	2008.07.24 09:30	2008.07.24 06:00	2008.07.24 13:00	2008	7	24	13:00	2008.07.24	2008.561589	2008.561191	0		1.37	-7.354	-47.988			0	None	input	near met. site at Carreg Wen	yes	yes	no	no	56	Thursday	73	7	-7.354	-47.988	1.37
1735	CR1735	CR	2008.07.24 20:00	2008.07.24 16:30	2008.07.24 13:00	2008.07.24 20:00	2008	7	24	20:00	2008.07.24	2008.562386	2008.561988	0		0.44	-7.625	-47.661			0	None	input	near met. site at Carreg Wen	yes	yes	no	no	7	Thursday	73	8	-7.625	-47.661	0.44
1736	CR1736	CR	2008.07.25 03:00	2008.07.24 23:30	2008.07.24 20:00	2008.07.25 03:00	2008	7	25	03:00	2008.07.25	2008.563183	2008.562785	0							0	None	input	near met. site at Carreg Wen	no	no		no	7	Thursday	73	9
1737	CR1737	CR	2008.07.25 10:00	2008.07.25 09:30	2008.07.25 03:00	2008.07.25 10:00	2008	7	25	10:00	2008.07.25	2008.56398	2008.563923	0.07142857	-1.146128						0.5	None	input	near met. site at Carreg Wen	no	no		no	14	Friday	73	10
1738	CR1738	CR	2008.07.25 17:00	2008.07.25 13:30	2008.07.25 10:00	2008.07.25 17:00	2008	7	25	17:00	2008.07.25	2008.564777	2008.564378	0		11.1					0	None	input	near met. site at Carreg Wen	yes	no		no	21	Friday	73	11			11.1
1739	CR1739	CR	2008.07.26 00:00	2008.07.25 20:30	2008.07.25 17:00	2008.07.26 00:00	2008	7	26	00:00	2008.07.26	2008.565574	2008.565175	0							0	None	input	near met. site at Carreg Wen	no	no		no	7	Friday	73	12
1740	CR1740	CR	2008.07.26 07:00	2008.07.26 03:30	2008.07.26 00:00	2008.07.26 07:00	2008	7	26	07:00	2008.07.26	2008.566371	2008.565972	0							0	None	input	near met. site at Carreg Wen	no	no		no	14	Saturday	73	13
1741	CR1741	CR	2008.07.26 14:00	2008.07.26 10:30	2008.07.26 07:00	2008.07.26 14:00	2008	7	26	14:00	2008.07.26	2008.567168	2008.566769	0							0	None	input	near met. site at Carreg Wen	no	no		no	21	Saturday	73	14
1742	CR1742	CR	2008.07.26 21:00	2008.07.26 17:30	2008.07.26 14:00	2008.07.26 21:00	2008	7	26	21:00	2008.07.26	2008.567965	2008.567566	0							0	None	input	near met. site at Carreg Wen	no	no		no	28	Saturday	73	15
1743	CR1743	CR	2008.07.27 04:00	2008.07.27 00:30	2008.07.26 21:00	2008.07.27 04:00	2008	7	27	04:00	2008.07.27	2008.568761	2008.568363	0							0	None	input	near met. site at Carreg Wen	no	no		no	35	Saturday	73	16
1744	CR1744	CR	2008.07.27 11:00	2008.07.27 07:30	2008.07.27 04:00	2008.07.27 11:00	2008	7	27	11:00	2008.07.27	2008.569558	2008.56916	0							0	None	input	near met. site at Carreg Wen	no	no		no	42	Sunday	73	17
1745	CR1745	CR	2008.07.27 18:00	2008.07.27 14:30	2008.07.27 11:00	2008.07.27 18:00	2008	7	27	18:00	2008.07.27	2008.570355	2008.569957	0							0	None	input	near met. site at Carreg Wen	no	no		no	49	Sunday	73	18
1746	CR1746	CR	2008.07.28 01:00	2008.07.27 21:30	2008.07.27 18:00	2008.07.28 01:00	2008	7	28	01:00	2008.07.28	2008.571152	2008.570754	0							0	None	input	near met. site at Carreg Wen	no	no		no	56	Sunday	73	19
1747	CR1747	CR	2008.07.28 08:00	2008.07.28 04:30	2008.07.28 01:00	2008.07.28 08:00	2008	7	28	08:00	2008.07.28	2008.571949	2008.571551	0							0	None	input	near met. site at Carreg Wen	no	no		no	63	Monday	73	20
1748	CR1748	CR	2008.07.28 15:00	2008.07.28 11:30	2008.07.28 08:00	2008.07.28 15:00	2008	7	28	15:00	2008.07.28	2008.572746	2008.572347	0							0	None	input	near met. site at Carreg Wen	no	no		no	70	Monday	73	21
1749	CR1749	CR	2008.07.28 22:00	2008.07.28 17:45	2008.07.28 15:00	2008.07.28 22:00	2008	7	28	22:00	2008.07.28	2008.573543	2008.573059	0.28571429	-0.544068	7.47	-5.82	-42.846			2	None	input	near met. site at Carreg Wen	yes	yes	no	no	77	Monday	73	22	-5.82	-42.846	7.47
1750	CR1750	CR	2008.07.29 05:00	2008.07.29 00:03	2008.07.28 22:00	2008.07.29 05:00	2008	7	29	05:00	2008.07.29	2008.57434	2008.573778	1.14285714	0.05799195	1.91	-7.535	-46.657			8	None	input	near met. site at Carreg Wen	yes	yes	no	no	7	Monday	73	23	-7.535	-46.657	1.91
1751	CR1751	CR	2008.07.29 12:00	2008.07.29 08:30	2008.07.29 05:00	2008.07.29 12:00	2008	7	29	12:00	2008.07.29	2008.575137	2008.574738	0		0.55	-7.381	-44.355			0	None	input	near met. site at Carreg Wen	yes	yes	no	no	7	Tuesday	73	24	-7.381	-44.355	0.55
1752	CR1752	CR	2008.07.29 19:00	2008.07.29 13:55	2008.07.29 12:00	2008.07.29 19:00	2008	7	29	19:00	2008.07.29	2008.575934	2008.575355	0.85714286	-0.0669468	1.36	-7.299	-50.606			6	None	input	near met. site at Carreg Wen	yes	yes	no	no	7	Tuesday	74	1	-7.299	-50.606	1.36
1753	CR1753	CR	2008.07.30 02:00	2008.07.30 01:30	2008.07.29 19:00	2008.07.30 02:00	2008	7	30	02:00	2008.07.30	2008.57673	2008.576674	0.07142857	-1.146128	5.97	-7.861	-52.489			0.5	None	input	near met. site at Carreg Wen	yes	yes	no	no	7	Tuesday	74	2	-7.861	-52.489	5.97
1754	CR1754	CR	2008.07.30 09:00	2008.07.30 05:30	2008.07.30 02:00	2008.07.30 09:00	2008	7	30	09:00	2008.07.30	2008.577527	2008.577129	0.28571429	-0.544068	7.15	-8.306	-56.951			2	None	input	near met. site at Carreg Wen	yes	yes	no	no	7	Wednesday	74	3	-8.306	-56.951	7.15
1755	CR1755	CR	2008.07.30 16:00	2008.07.30 12:30	2008.07.30 09:00	2008.07.30 16:00	2008	7	30	16:00	2008.07.30	2008.578324	2008.577926	0		10.8					0	None	input	near met. site at Carreg Wen	yes	no		no	7	Wednesday	74	4			10.8
1756	CR1756	CR	2008.07.30 23:00	2008.07.30 16:50	2008.07.30 16:00	2008.07.30 23:00	2008	7	30	23:00	2008.07.30	2008.579121	2008.578419	0.21428571	-0.6690068	5.53	-3.082	-14.335			1.5	None	input	near met. site at Carreg Wen	yes	yes	no	no	7	Wednesday	74	5	-3.082	-14.335	5.53
1757	CR1757	CR	2008.07.31 06:00	2008.07.30 23:30	2008.07.30 23:00	2008.07.31 06:00	2008	7	31	06:00	2008.07.31	2008.579918	2008.579178	0.07142857	-1.146128	15.9					0.5	None	input	near met. site at Carreg Wen	yes	no		no	7	Wednesday	74	6			15.9
1758	CR1758	CR	2008.07.31 13:00	2008.07.31 09:30	2008.07.31 06:00	2008.07.31 13:00	2008	7	31	13:00	2008.07.31	2008.580715	2008.580317	0							0	None	input	near met. site at Carreg Wen	no	no		no	7	Thursday	74	7
1759	CR1759	CR	2008.07.31 20:00	2008.07.31 16:58	2008.07.31 13:00	2008.07.31 20:00	2008	7	31	20:00	2008.07.31	2008.581512	2008.581168	1.78571429	0.25181197	0.6	-4.642	-22.953			12.5	None	input	near met. site at Carreg Wen	yes	yes	no	no	14	Thursday	74	8	-4.642	-22.953	0.6
1760	CR1760	CR	2008.08.01 03:00	2008.07.31 21:00	2008.07.31 20:00	2008.08.01 03:00	2008	8	1	03:00	2008.08.01	2008.582309	2008.581626	0.14285714	-0.845098	2.22					1	None	input	near met. site at Carreg Wen	yes	no		no	7	Thursday	74	9			2.22
1761	CR1761	CR	2008.08.01 10:00	2008.08.01 04:40	2008.08.01 03:00	2008.08.01 10:00	2008	8	1	10:00	2008.08.01	2008.583106	2008.582499	0.42857143	-0.3679768	1.92	-8.258	-50.045			3	None	input	near met. site at Carreg Wen	yes	yes	no	no	7	Friday	74	10	-8.258	-50.045	1.92
1762	CR1762	CR	2008.08.01 17:00	2008.08.01 13:30	2008.08.01 10:00	2008.08.01 17:00	2008	8	1	17:00	2008.08.01	2008.583903	2008.583504	0							0	None	input	near met. site at Carreg Wen	no	no		no	7	Friday	74	11
1763	CR1763	CR	2008.08.02 00:00	2008.08.01 21:30	2008.08.01 17:00	2008.08.02 00:00	2008	8	2	00:00	2008.08.02	2008.5847	2008.584415	0.07142857	-1.146128	4.57					0.5	None	input	near met. site at Carreg Wen	yes	no		no	14	Friday	74	12			4.57
1764	CR1764	CR	2008.08.02 07:00	2008.08.02 01:00	2008.08.02 00:00	2008.08.02 07:00	2008	8	2	07:00	2008.08.02	2008.585496	2008.584813	0.14285714	-0.845098	4.97					1	None	input	near met. site at Carreg Wen	yes	no		no	7	Saturday	74	13			4.97
1765	CR1765	CR	2008.08.02 14:00	2008.08.02 10:30	2008.08.02 07:00	2008.08.02 14:00	2008	8	2	14:00	2008.08.02	2008.586293	2008.585895	0							0	None	input	near met. site at Carreg Wen	no	no		no	7	Saturday	74	14
1766	CR1766	CR	2008.08.02 21:00	2008.08.02 17:30	2008.08.02 14:00	2008.08.02 21:00	2008	8	2	21:00	2008.08.02	2008.58709	2008.586692	0							0	None	input	near met. site at Carreg Wen	no	no		no	14	Saturday	74	15
1767	CR1767	CR	2008.08.03 04:00	2008.08.03 00:30	2008.08.02 21:00	2008.08.03 04:00	2008	8	3	04:00	2008.08.03	2008.587887	2008.587489	0							0	None	input	near met. site at Carreg Wen	no	no		no	21	Saturday	74	16
1768	CR1768	CR	2008.08.03 11:00	2008.08.03 07:30	2008.08.03 04:00	2008.08.03 11:00	2008	8	3	11:00	2008.08.03	2008.588684	2008.588286	0							0	None	input	near met. site at Carreg Wen	no	no		no	28	Sunday	74	17
1769	CR1769	CR	2008.08.03 18:00	2008.08.03 14:30	2008.08.03 11:00	2008.08.03 18:00	2008	8	3	18:00	2008.08.03	2008.589481	2008.589082	0							0	None	input	near met. site at Carreg Wen	no	no		no	35	Sunday	74	18
1770	CR1770	CR	2008.08.04 01:00	2008.08.03 21:30	2008.08.03 18:00	2008.08.04 01:00	2008	8	4	01:00	2008.08.04	2008.590278	2008.589879	0							0	None	input	near met. site at Carreg Wen	no	no		no	42	Sunday	74	19
1771	CR1771	CR	2008.08.04 08:00	2008.08.04 05:19	2008.08.04 01:00	2008.08.04 08:00	2008	8	4	08:00	2008.08.04	2008.591075	2008.590769	0.78571429	-0.1047354	4.76	-5.249	-33.305			5.5	None	input	near met. site at Carreg Wen	yes	yes	no	no	49	Monday	74	20	-5.249	-33.305	4.76
1772	CR1772	CR	2008.08.04 15:00	2008.08.04 08:30	2008.08.04 08:00	2008.08.04 15:00	2008	8	4	15:00	2008.08.04	2008.591872	2008.591132	0.07142857	-1.146128	4.34	-5.28	-34.928			0.5	None	input	near met. site at Carreg Wen	yes	yes	no	no	7	Monday	74	21	-5.28	-34.928	4.34
1773	CR1773	CR	2008.08.04 22:00	2008.08.04 18:30	2008.08.04 15:00	2008.08.04 22:00	2008	8	4	22:00	2008.08.04	2008.592669	2008.59227	0							0	None	input	near met. site at Carreg Wen	no	no		no	7	Monday	74	22
1774	CR1774	CR	2008.08.05 05:00	2008.08.05 03:51	2008.08.04 22:00	2008.08.05 05:00	2008	8	5	05:00	2008.08.05	2008.593465	2008.593336	0.78571429	-0.1047354	1.72	-7.226	-48.672			5.5	None	input	near met. site at Carreg Wen	yes	yes	no	no	14	Monday	74	23	-7.226	-48.672	1.72
1775	CR1775	CR	2008.08.05 12:00	2008.08.05 08:04	2008.08.05 05:00	2008.08.05 12:00	2008	8	5	12:00	2008.08.05	2008.594262	2008.593815	2.64285714	0.42207369	0.27	-5.919	-34.974			18.5	None	input	near met. site at Carreg Wen	yes	yes	no	no	7	Tuesday	74	24	-5.919	-34.974	0.27
1776	CR1776	CR	2008.08.05 19:00	2008.08.05 13:07	2008.08.05 12:00	2008.08.05 19:00	2008	8	5	19:00	2008.08.05	2008.595059	2008.59439	0.57142857	-0.243038	1.1	-7.748	-51.388			4	None	input	near met. site at Carreg Wen	yes	yes	no	no	7	Tuesday	75	1	-7.748	-51.388	1.1
1777	CR1777	CR	2008.08.06 02:00	2008.08.05 23:00	2008.08.05 19:00	2008.08.06 02:00	2008	8	6	02:00	2008.08.06	2008.595856	2008.595515	0.14285714	-0.845098	8.55					1	None	input	near met. site at Carreg Wen	yes	no		no	7	Tuesday	75	2			8.55
1778	CR1778	CR	2008.08.06 09:00	2008.08.06 04:45	2008.08.06 02:00	2008.08.06 09:00	2008	8	6	09:00	2008.08.06	2008.596653	2008.596169	0.28571429	-0.544068	3.82	-4.783	-28.935			2	None	input	near met. site at Carreg Wen	yes	yes	no	no	7	Wednesday	75	3	-4.783	-28.935	3.82
1779	CR1779	CR	2008.08.06 16:00	2008.08.06 14:46	2008.08.06 09:00	2008.08.06 16:00	2008	8	6	16:00	2008.08.06	2008.59745	2008.59731	1.07142857	0.02996322	0.73	-4.118	-22.65			7.5	None	input	near met. site at Carreg Wen	yes	yes	no	no	7	Wednesday	75	4	-4.118	-22.65	0.73
1780	CR1780	CR	2008.08.06 23:00	2008.08.06 17:30	2008.08.06 16:00	2008.08.06 23:00	2008	8	6	23:00	2008.08.06	2008.598247	2008.597621	0.85714286	-0.0669468	1.31	-5.15	-29.716			6	None	input	near met. site at Carreg Wen	yes	yes	no	no	7	Wednesday	75	5	-5.15	-29.716	1.31
1781	CR1781	CR	2008.08.07 06:00	2008.08.07 02:30	2008.08.06 23:00	2008.08.07 06:00	2008	8	7	06:00	2008.08.07	2008.599044	2008.598645	0		18.8					0	None	input	near met. site at Carreg Wen	yes	no		no	7	Wednesday	75	6			18.8
1782	CR1782	CR	2008.08.07 13:00	2008.08.07 09:30	2008.08.07 06:00	2008.08.07 13:00	2008	8	7	13:00	2008.08.07	2008.599841	2008.599442	0		0.21	-15.418	-108.345			0	None	input	near met. site at Carreg Wen	yes	yes	no	no	7	Thursday	75	7	-15.418	-108.345	0.21
1783	CR1783	CR	2008.08.07 20:00	2008.08.07 13:30	2008.08.07 13:00	2008.08.07 20:00	2008	8	7	20:00	2008.08.07	2008.600638	2008.599898	0.07142857	-1.146128	5.28					0.5	None	input	near met. site at Carreg Wen	yes	no		no	7	Thursday	75	8			5.28
1784	CR1784	CR	2008.08.08 03:00	2008.08.07 23:10	2008.08.07 20:00	2008.08.08 03:00	2008	8	8	03:00	2008.08.08	2008.601434	2008.600998	0.21428571	-0.6690068	5.88	-4.632	-31.533			1.5	None	input	near met. site at Carreg Wen	yes	yes	no	no	7	Thursday	75	9	-4.632	-31.533	5.88
1785	CR1785	CR	2008.08.08 10:00	2008.08.08 06:30	2008.08.08 03:00	2008.08.08 10:00	2008	8	8	10:00	2008.08.08	2008.602231	2008.601833	0		2.73					0	None	input	near met. site at Carreg Wen	yes	no		no	7	Friday	75	10			2.73
1786	CR1786	CR	2008.08.08 17:00	2008.08.08 13:30	2008.08.08 10:00	2008.08.08 17:00	2008	8	8	17:00	2008.08.08	2008.603028	2008.60263	0							0	None	input	near met. site at Carreg Wen	no	no		no	7	Friday	75	11
1787	CR1787	CR	2008.08.09 00:00	2008.08.08 20:30	2008.08.08 17:00	2008.08.09 00:00	2008	8	9	00:00	2008.08.09	2008.603825	2008.603427	0							0	None	input	near met. site at Carreg Wen	no	no		no	14	Friday	75	12
1788	CR1788	CR	2008.08.09 07:00	2008.08.09 06:07	2008.08.09 00:00	2008.08.09 07:00	2008	8	9	07:00	2008.08.09	2008.604622	2008.604522	0.57142857	-0.243038	8.53	-3.674	-19.973			4	None	input	near met. site at Carreg Wen	yes	yes	no	no	21	Saturday	75	13	-3.674	-19.973	8.53
1789	CR1789	CR	2008.08.09 14:00	2008.08.09 09:59	2008.08.09 07:00	2008.08.09 14:00	2008	8	9	14:00	2008.08.09	2008.605419	2008.604962	4.85714286	0.68638088	0.57	-2.928	-14.239			34	None	input	near met. site at Carreg Wen	yes	yes	no	no	7	Saturday	75	14	-2.928	-14.239	0.57
1790	CR1790	CR	2008.08.09 21:00	2008.08.09 16:42	2008.08.09 14:00	2008.08.09 21:00	2008	8	9	21:00	2008.08.09	2008.606216	2008.605726	1.78571429	0.25181197	5.75	-4.998	-30.551			12.5	None	input	near met. site at Carreg Wen	yes	yes	no	no	7	Saturday	75	15	-4.998	-30.551	5.75
1791	CR1791	CR	2008.08.10 04:00	2008.08.09 22:50	2008.08.09 21:00	2008.08.10 04:00	2008	8	10	04:00	2008.08.10	2008.607013	2008.606425	0.21428571	-0.6690068	17.1	-3.933	-22.903			1.5	None	input	near met. site at Carreg Wen	yes	yes	no	no	7	Saturday	75	16	-3.933	-22.903	17.1
1792	CR1792	CR	2008.08.10 11:00	2008.08.10 06:30	2008.08.10 04:00	2008.08.10 11:00	2008	8	10	11:00	2008.08.10	2008.60781	2008.607297	0.21428571	-0.6690068	5.5	-4.448	-25.383			1.5	None	input	near met. site at Carreg Wen	yes	yes	no	no	7	Sunday	75	17	-4.448	-25.383	5.5
1793	CR1793	CR	2008.08.10 18:00	2008.08.10 14:30	2008.08.10 11:00	2008.08.10 18:00	2008	8	10	18:00	2008.08.10	2008.608607	2008.608208	0							0	None	input	near met. site at Carreg Wen	no	no		no	7	Sunday	75	18
1794	CR1794	CR	2008.08.11 01:00	2008.08.10 22:32	2008.08.10 18:00	2008.08.11 01:00	2008	8	11	01:00	2008.08.11	2008.609404	2008.609123	1.78571429	0.25181197	0.88	-5.177	-28.708			12.5	None	input	near met. site at Carreg Wen	yes	yes	no	no	14	Sunday	75	19	-5.177	-28.708	0.88
1795	CR1795	CR	2008.08.11 08:00	2008.08.11 02:42	2008.08.11 01:00	2008.08.11 08:00	2008	8	11	08:00	2008.08.11	2008.6102	2008.609597	0.35714286	-0.447158	11	-4.859	-25.21			2.5	None	input	near met. site at Carreg Wen	yes	yes	no	no	7	Monday	75	20	-4.859	-25.21	11
1796	CR1796	CR	2008.08.11 15:00	2008.08.11 11:23	2008.08.11 08:00	2008.08.11 15:00	2008	8	11	15:00	2008.08.11	2008.610997	2008.610586	0.64285714	-0.1918855	2.06	-5.062	-25.49			4.5	None	input	near met. site at Carreg Wen	yes	yes	no	no	7	Monday	75	21	-5.062	-25.49	2.06
1797	CR1797	CR	2008.08.11 22:00	2008.08.11 19:30	2008.08.11 15:00	2008.08.11 22:00	2008	8	11	22:00	2008.08.11	2008.611794	2008.61151	0.07142857	-1.146128	7.56					0.5	None	input	near met. site at Carreg Wen	yes	no		no	7	Monday	75	22			7.56
1798	CR1798	CR	2008.08.12 05:00	2008.08.12 02:13	2008.08.11 22:00	2008.08.12 05:00	2008	8	12	05:00	2008.08.12	2008.612591	2008.612275	1.57142857	0.19629465	0.67	-14.498	-102.246			11	None	input	near met. site at Carreg Wen	yes	yes	no	no	7	Monday	75	23	-14.498	-102.246	0.67
1799	CR1799	CR	2008.08.12 12:00	2008.08.12 06:55	2008.08.12 05:00	2008.08.12 12:00	2008	8	12	12:00	2008.08.12	2008.613388	2008.612811	0.5	-0.30103	0.65	-12.806	-91.489			3.5	None	input	near met. site at Carreg Wen	yes	yes	no	no	7	Tuesday	75	24	-12.806	-91.489	0.65
1800	CR1800	CR	2008.08.12 19:00	2008.08.12 15:02	2008.08.12 12:00	2008.08.12 19:00	2008	8	12	19:00	2008.08.12	2008.614185	2008.613735	1.57142857	0.19629465	3.47	-10.045	-66.053			11	None	input	near met. site at Carreg Wen	yes	yes	no	no	7	Tuesday	76	1	-10.045	-66.053	3.47
1801	CR1801	CR	2008.08.13 02:00	2008.08.12 20:24	2008.08.12 19:00	2008.08.13 02:00	2008	8	13	02:00	2008.08.13	2008.614982	2008.614346	1.64285714	0.2155998	3.75	-10.269	-68.176			11.5	None	input	near met. site at Carreg Wen	yes	yes	no	no	7	Tuesday	76	2	-10.269	-68.176	3.75
1802	CR1802	CR	2008.08.13 09:00	2008.08.13 03:30	2008.08.13 02:00	2008.08.13 09:00	2008	8	13	09:00	2008.08.13	2008.615779	2008.615153	0.07142857	-1.146128	29.3					0.5	None	input	near met. site at Carreg Wen	yes	no		yes	7	Wednesday	76	3			29.3
1803	CR1803	CR	2008.08.13 16:00	2008.08.13 13:20	2008.08.13 09:00	2008.08.13 16:00	2008	8	13	16:00	2008.08.13	2008.616576	2008.616272	0.85714286	-0.0669468	6.49					6	None	input	near met. site at Carreg Wen	yes	no		no	7	Wednesday	76	4			6.49
1804	CR1804	CR	2008.08.13 23:00	2008.08.13 17:52	2008.08.13 16:00	2008.08.13 23:00	2008	8	13	23:00	2008.08.13	2008.617373	2008.616788	2.14285714	0.33099322	4.65	-10.642	-72.48			15	None	input	near met. site at Carreg Wen	yes	yes	no	no	7	Wednesday	76	5	-10.642	-72.48	4.65
1805	CR1805	CR	2008.08.14 06:00	2008.08.14 03:14	2008.08.13 23:00	2008.08.14 06:00	2008	8	14	06:00	2008.08.14	2008.618169	2008.617854	1.07142857	0.02996322	6.48	-5.519	-30.047			7.5	None	input	near met. site at Carreg Wen	yes	yes	no	no	7	Wednesday	76	6	-5.519	-30.047	6.48
1806	CR1806	CR	2008.08.14 13:00	2008.08.14 09:30	2008.08.14 06:00	2008.08.14 13:00	2008	8	14	13:00	2008.08.14	2008.618966	2008.618568	0		2.11	-5.578	-30.915			0	None	input	near met. site at Carreg Wen	yes	yes	no	no	7	Thursday	76	7	-5.578	-30.915	2.11
1807	CR1807	CR	2008.08.14 20:00	2008.08.14 16:30	2008.08.14 13:00	2008.08.14 20:00	2008	8	14	20:00	2008.08.14	2008.619763	2008.619365	0							0	None	input	near met. site at Carreg Wen	no	no		no	7	Thursday	76	8
1808	CR1808	CR	2008.08.15 03:00	2008.08.15 01:30	2008.08.14 20:00	2008.08.15 03:00	2008	8	15	03:00	2008.08.15	2008.62056	2008.620389	0.07142857	-1.146128						0.5	None	input	near met. site at Carreg Wen	no	no		no	14	Thursday	76	9
1809	CR1809	CR	2008.08.15 10:00	2008.08.15 06:30	2008.08.15 03:00	2008.08.15 10:00	2008	8	15	10:00	2008.08.15	2008.621357	2008.620959	0							0	None	input	near met. site at Carreg Wen	no	no		no	21	Friday	76	10
1810	CR1810	CR	2008.08.15 17:00	2008.08.15 13:30	2008.08.15 10:00	2008.08.15 17:00	2008	8	15	17:00	2008.08.15	2008.622154	2008.621756	0							0	None	input	near met. site at Carreg Wen	no	no		no	28	Friday	76	11
1811	CR1811	CR	2008.08.16 00:00	2008.08.15 19:54	2008.08.15 17:00	2008.08.16 00:00	2008	8	16	00:00	2008.08.16	2008.622951	2008.622484	0.35714286	-0.447158	2.53	-5.225	-27.106			2.5	None	input	near met. site at Carreg Wen	yes	yes	no	no	35	Friday	76	12	-5.225	-27.106	2.53
1812	CR1812	CR	2008.08.16 07:00	2008.08.16 03:30	2008.08.16 00:00	2008.08.16 07:00	2008	8	16	07:00	2008.08.16	2008.623748	2008.623349	0							0	None	input	near met. site at Carreg Wen	no	no		no	7	Saturday	76	13
1813	CR1813	CR	2008.08.16 14:00	2008.08.16 13:00	2008.08.16 07:00	2008.08.16 14:00	2008	8	16	14:00	2008.08.16	2008.624545	2008.624431	0.14285714	-0.845098	8.25					1	None	input	near met. site at Carreg Wen	yes	no		no	14	Saturday	76	14			8.25
1814	CR1814	CR	2008.08.16 21:00	2008.08.16 17:46	2008.08.16 14:00	2008.08.16 21:00	2008	8	16	21:00	2008.08.16	2008.625342	2008.624974	1.57142857	0.19629465	1.86	-6.402	-36.423			11	None	input	near met. site at Carreg Wen	yes	yes	no	no	7	Saturday	76	15	-6.402	-36.423	1.86
1815	CR1815	CR	2008.08.17 04:00	2008.08.17 00:30	2008.08.16 21:00	2008.08.17 04:00	2008	8	17	04:00	2008.08.17	2008.626138	2008.62574	0							0	None	input	near met. site at Carreg Wen	no	no		no	7	Saturday	76	16
1816	CR1816	CR	2008.08.17 11:00	2008.08.17 06:30	2008.08.17 04:00	2008.08.17 11:00	2008	8	17	11:00	2008.08.17	2008.626935	2008.626423	0.21428571	-0.6690068	14	-4.263	-22.286			1.5	None	input	near met. site at Carreg Wen	yes	yes	no	no	14	Sunday	76	17	-4.263	-22.286	14
1817	CR1817	CR	2008.08.17 18:00	2008.08.17 17:15	2008.08.17 11:00	2008.08.17 18:00	2008	8	17	18:00	2008.08.17	2008.627732	2008.627647	0.28571429	-0.544068	5	-4.28	-21.783			2	None	input	near met. site at Carreg Wen	yes	yes	no	no	7	Sunday	76	18	-4.28	-21.783	5
1818	CR1818	CR	2008.08.18 01:00	2008.08.17 21:24	2008.08.17 18:00	2008.08.18 01:00	2008	8	18	01:00	2008.08.18	2008.628529	2008.62812	0.78571429	-0.1047354	0.67	-5.536	-30.064			5.5	None	input	near met. site at Carreg Wen	yes	yes	no	no	7	Sunday	76	19	-5.536	-30.064	0.67
1819	CR1819	CR	2008.08.18 08:00	2008.08.18 02:30	2008.08.18 01:00	2008.08.18 08:00	2008	8	18	08:00	2008.08.18	2008.629326	2008.6287	0.21428571	-0.6690068	0.87	-4.365	-21.722			1.5	None	input	near met. site at Carreg Wen	yes	yes	no	no	7	Monday	76	20	-4.365	-21.722	0.87
1820	CR1820	CR	2008.08.18 15:00	2008.08.18 12:04	2008.08.18 08:00	2008.08.18 15:00	2008	8	18	15:00	2008.08.18	2008.630123	2008.62979	1	0	1.83	-4.992	-29.163			7	None	input	near met. site at Carreg Wen	yes	yes	no	no	7	Monday	76	21	-4.992	-29.163	1.83
1821	CR1821	CR	2008.08.18 22:00	2008.08.18 20:24	2008.08.18 15:00	2008.08.18 22:00	2008	8	18	22:00	2008.08.18	2008.63092	2008.630739	2.35714286	0.3723859	0.38	-7.262	-48.015			16.5	None	input	near met. site at Carreg Wen	yes	yes	no	no	7	Monday	76	22	-7.262	-48.015	0.38
1822	CR1822	CR	2008.08.19 05:00	2008.08.19 01:54	2008.08.18 22:00	2008.08.19 05:00	2008	8	19	05:00	2008.08.19	2008.631717	2008.631364	1.78571429	0.25181197	1.46	-7.164	-48.573			12.5	None	input	near met. site at Carreg Wen	yes	yes	no	no	7	Monday	76	23	-7.164	-48.573	1.46
1823	CR1823	CR	2008.08.19 12:00	2008.08.19 07:21	2008.08.19 05:00	2008.08.19 12:00	2008	8	19	12:00	2008.08.19	2008.632514	2008.631985	1	0	4.12	-7.655	-51.966			7	None	input	near met. site at Carreg Wen	yes	yes	no	no	7	Tuesday	76	24	-7.655	-51.966	4.12
1824	CR1824	CR	2008.08.19 19:00	2008.08.19 15:45	2008.08.19 12:00	2008.08.19 19:00	2008	8	19	19:00	2008.08.19	2008.633311	2008.632941	1.14285714	0.05799195	2	-4.696	-26.544			8	None	input	near met. site at Carreg Wen	yes	yes	no	no	7	Tuesday	77	1	-4.696	-26.544	2
1825	CR1825	CR	2008.08.20 02:00	2008.08.19 22:15	2008.08.19 19:00	2008.08.20 02:00	2008	8	20	02:00	2008.08.20	2008.634108	2008.633681	0.57142857	-0.243038	2.45	-4.294	-24.619			4	None	input	near met. site at Carreg Wen	yes	yes	no	no	7	Tuesday	77	2	-4.294	-24.619	2.45
1826	CR1826	CR	2008.08.20 09:00	2008.08.20 07:10	2008.08.20 02:00	2008.08.20 09:00	2008	8	20	09:00	2008.08.20	2008.634904	2008.634696	0.21428571	-0.6690068	9.67	-4.672	-28.671			1.5	None	input	near met. site at Carreg Wen	yes	yes	no	no	7	Wednesday	77	3	-4.672	-28.671	9.67
1827	CR1827	CR	2008.08.20 16:00	2008.08.20 13:30	2008.08.20 09:00	2008.08.20 16:00	2008	8	20	16:00	2008.08.20	2008.635701	2008.635417	0.85714286	-0.0669468	5.01	-4.939	-32.277			6	None	input	near met. site at Carreg Wen	yes	yes	no	no	7	Wednesday	77	4	-4.939	-32.277	5.01
1828	CR1828	CR	2008.08.20 23:00	2008.08.20 18:43	2008.08.20 16:00	2008.08.20 23:00	2008	8	20	23:00	2008.08.20	2008.636498	2008.636012	0.92857143	-0.0321847	1.3	-7.155	-47.388			6.5	None	input	near met. site at Carreg Wen	yes	yes	no	no	7	Wednesday	77	5	-7.155	-47.388	1.3
1829	CR1829	CR	2008.08.21 06:00	2008.08.21 04:00	2008.08.20 23:00	2008.08.21 06:00	2008	8	21	06:00	2008.08.21	2008.637295	2008.637067	0.42857143	-0.3679768	6.17	-6.424	-39.666			3	None	input	near met. site at Carreg Wen	yes	yes	no	no	7	Wednesday	77	6	-6.424	-39.666	6.17
1830	CR1830	CR	2008.08.21 13:00	2008.08.21 09:42	2008.08.21 06:00	2008.08.21 13:00	2008	8	21	13:00	2008.08.21	2008.638092	2008.637717	1.71428571	0.23408321	0.95	-7.359	-46.669			12	None	input	near met. site at Carreg Wen	yes	yes	no	no	7	Thursday	77	7	-7.359	-46.669	0.95
1831	CR1831	CR	2008.08.21 20:00	2008.08.21 19:22	2008.08.21 13:00	2008.08.21 20:00	2008	8	21	20:00	2008.08.21	2008.638889	2008.638818	0.57142857	-0.243038	2.93					4	None	input	near met. site at Carreg Wen	yes	no		no	7	Thursday	77	8			2.93
1832	CR1832	CR	2008.08.22 03:00	2008.08.21 22:30	2008.08.21 20:00	2008.08.22 03:00	2008	8	22	03:00	2008.08.22	2008.639686	2008.639174	0.07142857	-1.146128	1.13	-6.716	-41.49			0.5	None	input	near met. site at Carreg Wen	yes	yes	no	no	7	Thursday	77	9	-6.716	-41.49	1.13
1833	CR1833	CR	2008.08.22 10:00	2008.08.22 06:30	2008.08.22 03:00	2008.08.22 10:00	2008	8	22	10:00	2008.08.22	2008.640483	2008.640084	0							0	None	input	near met. site at Carreg Wen	no	no		no	7	Friday	77	10
1834	CR1834	CR	2008.08.22 17:00	2008.08.22 13:30	2008.08.22 10:00	2008.08.22 17:00	2008	8	22	17:00	2008.08.22	2008.64128	2008.640881	0							0	None	input	near met. site at Carreg Wen	no	no		no	14	Friday	77	11
1835	CR1835	CR	2008.08.23 00:00	2008.08.22 20:30	2008.08.22 17:00	2008.08.23 00:00	2008	8	23	00:00	2008.08.23	2008.642077	2008.641678	0							0	None	input	near met. site at Carreg Wen	no	no		no	21	Friday	77	12
1836	CR1836	CR	2008.08.23 07:00	2008.08.23 03:30	2008.08.23 00:00	2008.08.23 07:00	2008	8	23	07:00	2008.08.23	2008.642873	2008.642475	0							0	None	input	near met. site at Carreg Wen	no	no		no	28	Saturday	77	13
1837	CR1837	CR	2008.08.23 14:00	2008.08.23 10:30	2008.08.23 07:00	2008.08.23 14:00	2008	8	23	14:00	2008.08.23	2008.64367	2008.643272	0							0	None	input	near met. site at Carreg Wen	no	no		no	35	Saturday	77	14
1838	CR1838	CR	2008.08.23 21:00	2008.08.23 17:00	2008.08.23 14:00	2008.08.23 21:00	2008	8	23	21:00	2008.08.23	2008.644467	2008.644012	0.42857143	-0.3679768	2.87	-5.991	-41.435			3	None	input	near met. site at Carreg Wen	yes	yes	no	no	42	Saturday	77	15	-5.991	-41.435	2.87
1839	CR1839	CR	2008.08.24 04:00	2008.08.23 23:52	2008.08.23 21:00	2008.08.24 04:00	2008	8	24	04:00	2008.08.24	2008.645264	2008.644794	1.35714286	0.13262557	0.77	-5.055	-29.356			9.5	None	input	near met. site at Carreg Wen	yes	yes	no	no	7	Saturday	77	16	-5.055	-29.356	0.77
1840	CR1840	CR	2008.08.24 11:00	2008.08.24 05:30	2008.08.24 04:00	2008.08.24 11:00	2008	8	24	11:00	2008.08.24	2008.646061	2008.645435	0.35714286	-0.447158	7.33	-7.555	-51.094			2.5	None	input	near met. site at Carreg Wen	yes	yes	no	no	7	Sunday	77	17	-7.555	-51.094	7.33
1841	CR1841	CR	2008.08.24 18:00	2008.08.24 14:30	2008.08.24 11:00	2008.08.24 18:00	2008	8	24	18:00	2008.08.24	2008.646858	2008.64646	0							0	None	input	near met. site at Carreg Wen	no	no		no	7	Sunday	77	18
1842	CR1842	CR	2008.08.25 01:00	2008.08.24 18:30	2008.08.24 18:00	2008.08.25 01:00	2008	8	25	01:00	2008.08.25	2008.647655	2008.646915	0.07142857	-1.146128						0.5	None	input	near met. site at Carreg Wen	no	no		no	14	Sunday	77	19
1843	CR1843	CR	2008.08.25 08:00	2008.08.25 05:30	2008.08.25 01:00	2008.08.25 08:00	2008	8	25	08:00	2008.08.25	2008.648452	2008.648167	0.21428571	-0.6690068	5.97	-3.461	-19.845			1.5	None	input	near met. site at Carreg Wen	yes	yes	no	no	21	Monday	77	20	-3.461	-19.845	5.97
1844	CR1844	CR	2008.08.25 15:00	2008.08.25 11:30	2008.08.25 08:00	2008.08.25 15:00	2008	8	25	15:00	2008.08.25	2008.649249	2008.64885	0							0	None	input	near met. site at Carreg Wen	no	no		no	7	Monday	77	21
1845	CR1845	CR	2008.08.25 22:00	2008.08.25 18:50	2008.08.25 15:00	2008.08.25 22:00	2008	8	25	22:00	2008.08.25	2008.650046	2008.649685	0.21428571	-0.6690068	20.8	-3.039	-14.574			1.5	None	input	near met. site at Carreg Wen	yes	yes	no	no	14	Monday	77	22	-3.039	-14.574	20.8
1846	CR1846	CR	2008.08.26 05:00	2008.08.26 00:30	2008.08.25 22:00	2008.08.26 05:00	2008	8	26	05:00	2008.08.26	2008.650842	2008.65033	0.21428571	-0.6690068	9.33	-2.904	-14.567			1.5	None	input	near met. site at Carreg Wen	yes	yes	no	no	7	Monday	77	23	-2.904	-14.567	9.33
1847	CR1847	CR	2008.08.26 12:00	2008.08.26 07:30	2008.08.26 05:00	2008.08.26 12:00	2008	8	26	12:00	2008.08.26	2008.651639	2008.651127	0.28571429	-0.544068	4.68	-3.324	-18.016			2	None	input	near met. site at Carreg Wen	yes	yes	no	no	7	Tuesday	77	24	-3.324	-18.016	4.68
1848	CR1848	CR	2008.08.26 19:00	2008.08.26 15:30	2008.08.26 12:00	2008.08.26 19:00	2008	8	26	19:00	2008.08.26	2008.652436	2008.652038	0							0	None	input	near met. site at Carreg Wen	yes	no		no	7	Tuesday	78	1
1849	CR1849	CR	2008.08.27 02:00	2008.08.26 22:54	2008.08.26 19:00	2008.08.27 02:00	2008	8	27	02:00	2008.08.27	2008.653233	2008.65288	0.35714286	-0.447158	3.65	-3.807	-20.895			2.5	None	input	near met. site at Carreg Wen	yes	yes	no	no	7	Tuesday	78	2	-3.807	-20.895	3.65
1850	CR1850	CR	2008.08.27 09:00	2008.08.27 04:00	2008.08.27 02:00	2008.08.27 09:00	2008	8	27	09:00	2008.08.27	2008.65403	2008.653461	0.42857143	-0.3679768	2.75	-4.294	-23.658			3	None	input	near met. site at Carreg Wen	yes	yes	no	no	7	Wednesday	78	3	-4.294	-23.658	2.75
1851	CR1851	CR	2008.08.27 16:00	2008.08.27 12:00	2008.08.27 09:00	2008.08.27 16:00	2008	8	27	16:00	2008.08.27	2008.654827	2008.654372	0.28571429	-0.544068	6.7	-2.42	-12.448			2	None	input	near met. site at Carreg Wen	yes	yes	no	no	7	Wednesday	78	4	-2.42	-12.448	6.7
1852	CR1852	CR	2008.08.27 23:00	2008.08.27 17:30	2008.08.27 16:00	2008.08.27 23:00	2008	8	27	23:00	2008.08.27	2008.655624	2008.654998	0.07142857	-1.146128	10.4	-2.173	-10.41			0.5	None	input	near met. site at Carreg Wen	yes	yes	no	no	7	Wednesday	78	5	-2.173	-10.41	10.4
1853	CR1853	CR	2008.08.28 06:00	2008.08.28 01:30	2008.08.27 23:00	2008.08.28 06:00	2008	8	28	06:00	2008.08.28	2008.656421	2008.655909	0.07142857	-1.146128						0.5	None	input	near met. site at Carreg Wen	no	no		no	7	Wednesday	78	6
1854	CR1854	CR	2008.08.28 13:00	2008.08.28 09:00	2008.08.28 06:00	2008.08.28 13:00	2008	8	28	13:00	2008.08.28	2008.657218	2008.656762	0.14285714	-0.845098	7.45	-1.95	-11.066			1	None	input	near met. site at Carreg Wen	yes	yes	no	no	14	Thursday	78	7	-1.95	-11.066	7.45
1855	CR1855	CR	2008.08.28 20:00	2008.08.28 16:30	2008.08.28 13:00	2008.08.28 20:00	2008	8	28	20:00	2008.08.28	2008.658015	2008.657616	0							0	None	input	near met. site at Carreg Wen	yes	no		no	7	Thursday	78	8
1856	CR1856	CR	2008.08.29 03:00	2008.08.29 00:30	2008.08.28 20:00	2008.08.29 03:00	2008	8	29	03:00	2008.08.29	2008.658812	2008.658527	0.07142857	-1.146128						0.5	None	input	near met. site at Carreg Wen	no	no		no	7	Thursday	78	9
1857	CR1857	CR	2008.08.29 10:00	2008.08.29 06:30	2008.08.29 03:00	2008.08.29 10:00	2008	8	29	10:00	2008.08.29	2008.659608	2008.65921	0							0	None	input	near met. site at Carreg Wen	no	no		no	14	Friday	78	10
1858	CR1858	CR	2008.08.29 17:00	2008.08.29 13:30	2008.08.29 10:00	2008.08.29 17:00	2008	8	29	17:00	2008.08.29	2008.660405	2008.660007	0							0	None	input	near met. site at Carreg Wen	no	no		no	21	Friday	78	11
1859	CR1859	CR	2008.08.30 00:00	2008.08.29 20:30	2008.08.29 17:00	2008.08.30 00:00	2008	8	30	00:00	2008.08.30	2008.661202	2008.660804	0							0	None	input	near met. site at Carreg Wen	no	no		no	28	Friday	78	12
1860	CR1860	CR	2008.08.30 07:00	2008.08.30 03:30	2008.08.30 00:00	2008.08.30 07:00	2008	8	30	07:00	2008.08.30	2008.661999	2008.661601	0							0	None	input	near met. site at Carreg Wen	no	no		no	35	Saturday	78	13
1861	CR1861	CR	2008.08.30 14:00	2008.08.30 10:30	2008.08.30 07:00	2008.08.30 14:00	2008	8	30	14:00	2008.08.30	2008.662796	2008.662398	0							0	None	input	near met. site at Carreg Wen	no	no		no	42	Saturday	78	14
1862	CR1862	CR	2008.08.30 21:00	2008.08.30 17:30	2008.08.30 14:00	2008.08.30 21:00	2008	8	30	21:00	2008.08.30	2008.663593	2008.663194	0							0	None	input	near met. site at Carreg Wen	no	no		no	49	Saturday	78	15
1863	CR1863	CR	2008.08.31 04:00	2008.08.31 00:30	2008.08.30 21:00	2008.08.31 04:00	2008	8	31	04:00	2008.08.31	2008.66439	2008.663991	0							0	None	input	near met. site at Carreg Wen	no	no		no	56	Saturday	78	16
1864	CR1864	CR	2008.08.31 11:00	2008.08.31 09:10	2008.08.31 04:00	2008.08.31 11:00	2008	8	31	11:00	2008.08.31	2008.665187	2008.664978	0.21428571	-0.6690068	8.16	-2.725	-13.387			1.5	None	input	near met. site at Carreg Wen	yes	yes	no	no	63	Sunday	78	17	-2.725	-13.387	8.16
1865	CR1865	CR	2008.08.31 18:00	2008.08.31 15:50	2008.08.31 11:00	2008.08.31 18:00	2008	8	31	18:00	2008.08.31	2008.665984	2008.665737	0.21428571	-0.6690068	1.37	-2.357	-13.755			1.5	None	input	near met. site at Carreg Wen	yes	yes	no	no	7	Sunday	78	18	-2.357	-13.755	1.37
1866	CR1866	CR	2008.09.01 01:00	2008.08.31 18:42	2008.08.31 18:00	2008.09.01 01:00	2008	9	1	01:00	2008.09.01	2008.666781	2008.666063	0.35714286	-0.447158	0.57	-4.349	-21.65			2.5	None	input	near met. site at Carreg Wen	yes	yes	no	no	7	Sunday	78	19	-4.349	-21.65	0.57
1867	CR1867	CR	2008.09.01 08:00	2008.09.01 04:50	2008.09.01 01:00	2008.09.01 08:00	2008	9	1	08:00	2008.09.01	2008.667577	2008.667217	0.21428571	-0.6690068	4.33	-4.655	-16.91			1.5	None	input	near met. site at Carreg Wen	yes	yes	no	no	7	Monday	78	20	-4.655	-16.91	4.33
1868	CR1868	CR	2008.09.01 15:00	2008.09.01 10:45	2008.09.01 08:00	2008.09.01 15:00	2008	9	1	15:00	2008.09.01	2008.668374	2008.667891	0.28571429	-0.544068	3.84	-3.177	-14.321			2	None	input	near met. site at Carreg Wen	yes	yes	no	no	7	Monday	78	21	-3.177	-14.321	3.84
1869	CR1869	CR	2008.09.01 22:00	2008.09.01 15:30	2008.09.01 15:00	2008.09.01 22:00	2008	9	1	22:00	2008.09.01	2008.669171	2008.668431	0.07142857	-1.146128	1.98					0.5	None	input	near met. site at Carreg Wen	yes	no		no	7	Monday	78	22			1.98
1870	CR1870	CR	2008.09.02 05:00	2008.09.02 04:30	2008.09.01 22:00	2008.09.02 05:00	2008	9	2	05:00	2008.09.02	2008.669968	2008.669911	0.07142857	-1.146128						0.5	None	input	near met. site at Carreg Wen	yes	no		no	7	Monday	78	23
1871	CR1871	CR	2008.09.02 12:00	2008.09.02 11:10	2008.09.02 05:00	2008.09.02 12:00	2008	9	2	12:00	2008.09.02	2008.670765	2008.67067	0.42857143	-0.3679768	13					3	Raining at change over	input	near met. site at Carreg Wen	yes	no		no	7	Tuesday	78	24			13
1872	CR1872	CR	2008.09.02 19:00	2008.09.02 14:00	2008.09.02 12:00	2008.09.02 19:00	2008	9	2	19:00	2008.09.02	2008.671562	2008.670994	2.35714286	0.3723859	5.3	-9.231	-58.887			16.5	None	input	near met. site at Carreg Wen	yes	yes	no	no	7	Tuesday	79	1	-9.231	-58.887	5.3
1873	CR1873	CR	2008.09.03 02:00	2008.09.02 23:30	2008.09.02 19:00	2008.09.03 02:00	2008	9	3	02:00	2008.09.03	2008.672359	2008.672074	0.21428571	-0.6690068	11.2	-8.125	-47.79			1.5	None	input	near met. site at Carreg Wen	yes	yes	no	no	7	Tuesday	79	2	-8.125	-47.79	11.2
1874	CR1874	CR	2008.09.03 09:00	2008.09.03 03:47	2008.09.03 02:00	2008.09.03 09:00	2008	9	3	09:00	2008.09.03	2008.673156	2008.672562	0.5	-0.30103	8.39	-6.463	-34.008			3.5	None	input	near met. site at Carreg Wen	yes	yes	no	no	7	Wednesday	79	3	-6.463	-34.008	8.39
1875	CR1875	CR	2008.09.03 16:00	2008.09.03 13:23	2008.09.03 09:00	2008.09.03 16:00	2008	9	3	16:00	2008.09.03	2008.673953	2008.673656	4.85714286	0.68638088	1.82	-12.066	-80.637			34	None	input	near met. site at Carreg Wen	yes	yes	no	no	7	Wednesday	79	4	-12.066	-80.637	1.82
1876	CR1876	CR	2008.09.03 23:00	2008.09.03 21:30	2008.09.03 16:00	2008.09.03 23:00	2008	9	3	23:00	2008.09.03	2008.67475	2008.674579	0.07142857	-1.146128	9.91	-9.226	-61.361			0.5	None	input	near met. site at Carreg Wen	yes	yes	no	no	7	Wednesday	79	5	-9.226	-61.361	9.91
1877	CR1877	CR	2008.09.04 06:00	2008.09.04 04:10	2008.09.03 23:00	2008.09.04 06:00	2008	9	4	06:00	2008.09.04	2008.675546	2008.675338	0.21428571	-0.6690068	10.4	-5.397	-30.505			1.5	None	input	near met. site at Carreg Wen	yes	yes	no	no	7	Wednesday	79	6	-5.397	-30.505	10.4
1878	CR1878	CR	2008.09.04 13:00	2008.09.04 07:35	2008.09.04 06:00	2008.09.04 13:00	2008	9	4	13:00	2008.09.04	2008.676343	2008.675727	1.71428571	0.23408321	0.45	-11.366	-79.982			12	None	input	near met. site at Carreg Wen	yes	yes	no	no	7	Thursday	79	7	-11.366	-79.982	0.45
1879	CR1879	CR	2008.09.04 20:00	2008.09.04 18:30	2008.09.04 13:00	2008.09.04 20:00	2008	9	4	20:00	2008.09.04	2008.67714	2008.67697	0.07142857	-1.146128	2.07					0.5	None	input	near met. site at Carreg Wen	yes	no		no	7	Thursday	79	8			2.07
1880	CR1880	CR	2008.09.05 03:00	2008.09.05 01:38	2008.09.04 20:00	2008.09.05 03:00	2008	9	5	03:00	2008.09.05	2008.677937	2008.677783	0.5	-0.30103	1.44	-8.125	-52.731			3.5	None	input	near met. site at Carreg Wen	yes	yes	no	no	7	Thursday	79	9	-8.125	-52.731	1.44
1881	CR1881	CR	2008.09.05 10:00	2008.09.05 07:15	2008.09.05 03:00	2008.09.05 10:00	2008	9	5	10:00	2008.09.05	2008.678734	2008.678422	2.35714286	0.3723859	0.35	-10.871	-72.167			16.5	None	input	near met. site at Carreg Wen	yes	yes	no	no	7	Friday	79	10	-10.871	-72.167	0.35
1882	CR1882	CR	2008.09.05 17:00	2008.09.05 11:46	2008.09.05 10:00	2008.09.05 17:00	2008	9	5	17:00	2008.09.05	2008.679531	2008.678936	3.14285714	0.49732464	0.57	-10.196	-71.054			22	None	input	near met. site at Carreg Wen	yes	yes	no	no	7	Friday	79	11	-10.196	-71.054	0.57
1883	CR1883	CR	2008.09.06 00:00	2008.09.05 20:12	2008.09.05 17:00	2008.09.06 00:00	2008	9	6	00:00	2008.09.06	2008.680328	2008.679895	2.14285714	0.33099322	0.35	-13.567	-100.301			15	None	input	near met. site at Carreg Wen	yes	yes	no	no	7	Friday	79	12	-13.567	-100.301	0.35
1884	CR1884	CR	2008.09.06 07:00	2008.09.06 04:36	2008.09.06 00:00	2008.09.06 07:00	2008	9	6	07:00	2008.09.06	2008.681125	2008.680852	0.71428571	-0.146128	0.54	-14.496	-105.161			5	None	input	near met. site at Carreg Wen	yes	yes	no	no	7	Saturday	79	13	-14.496	-105.161	0.54
1885	CR1885	CR	2008.09.06 14:00	2008.09.06 09:04	2008.09.06 07:00	2008.09.06 14:00	2008	9	6	14:00	2008.09.06	2008.681922	2008.681361	0.5	-0.30103	2.46	-13.031	-96.439			3.5	None	input	near met. site at Carreg Wen	yes	yes	no	no	7	Saturday	79	14	-13.031	-96.439	2.46
1886	CR1886	CR	2008.09.06 21:00	2008.09.06 17:00	2008.09.06 14:00	2008.09.06 21:00	2008	9	6	21:00	2008.09.06	2008.682719	2008.682263	0.14285714	-0.845098	7.57	-8.769	-59.118			1	None	input	near met. site at Carreg Wen	yes	yes	no	no	7	Saturday	79	15	-8.769	-59.118	7.57
1887	CR1887	CR	2008.09.07 04:00	2008.09.07 01:00	2008.09.06 21:00	2008.09.07 04:00	2008	9	7	04:00	2008.09.07	2008.683516	2008.683174	0.14285714	-0.845098	8.24					1	None	input	near met. site at Carreg Wen	yes	no		no	7	Saturday	79	16			8.24
1888	CR1888	CR	2008.09.07 11:00	2008.09.07 05:30	2008.09.07 04:00	2008.09.07 11:00	2008	9	7	11:00	2008.09.07	2008.684312	2008.683686	0.07142857	-1.146128	6.06					0.5	None	input	near met. site at Carreg Wen	yes	no		no	7	Sunday	79	17			6.06
1889	CR1889	CR	2008.09.07 18:00	2008.09.07 14:30	2008.09.07 11:00	2008.09.07 18:00	2008	9	7	18:00	2008.09.07	2008.685109	2008.684711	0							0	None	input	near met. site at Carreg Wen	no	no		no	7	Sunday	79	18
1890	CR1890	CR	2008.09.08 01:00	2008.09.07 21:30	2008.09.07 18:00	2008.09.08 01:00	2008	9	8	01:00	2008.09.08	2008.685906	2008.685508	0.07142857	-1.146128	19.7					0.5	None	input	near met. site at Carreg Wen	yes	no		no	14	Sunday	79	19			19.7
1891	CR1891	CR	2008.09.08 08:00	2008.09.08 04:30	2008.09.08 01:00	2008.09.08 08:00	2008	9	8	08:00	2008.09.08	2008.686703	2008.686305	0							0	None	input	near met. site at Carreg Wen	no	no		no	7	Monday	79	20
1892	CR1892	CR	2008.09.08 15:00	2008.09.08 11:30	2008.09.08 08:00	2008.09.08 15:00	2008	9	8	15:00	2008.09.08	2008.6875	2008.687102	0							0	None	input	near met. site at Carreg Wen	no	yes		no	14	Monday	79	21
1893	CR1893	CR	2008.09.08 22:00	2008.09.08 18:30	2008.09.08 15:00	2008.09.08 22:00	2008	9	8	22:00	2008.09.08	2008.688297	2008.687899	0							0	None	input	near met. site at Carreg Wen	no	no		no	21	Monday	79	22
1894	CR1894	CR	2008.09.09 05:00	2008.09.09 03:18	2008.09.08 22:00	2008.09.09 05:00	2008	9	9	05:00	2008.09.09	2008.689094	2008.6889	1.07142857	0.02996322	0.71	-5.976	-32.354			7.5	None	input	near met. site at Carreg Wen	yes	yes	no	no	28	Monday	79	23	-5.976	-32.354	0.71
1895	CR1895	CR	2008.09.09 12:00	2008.09.09 08:30	2008.09.09 05:00	2008.09.09 12:00	2008	9	9	12:00	2008.09.09	2008.689891	2008.689492	0.14285714	-0.845098	1.36	-6.444	-35.79			1	Mizzle at change over	input	near met. site at Carreg Wen	yes	yes	no	no	7	Tuesday	79	24	-6.444	-35.79	1.36
1896	CR1896	CR	2008.09.09 19:00	2008.09.09 13:30	2008.09.09 12:00	2008.09.09 19:00	2008	9	9	19:00	2008.09.09	2008.690688	2008.690062	0.42857143	-0.3679768	3.33	-6.31	-40.989			3	None	input	near met. site at Carreg Wen	yes	yes	no	no	7	Tuesday	80	1	-6.31	-40.989	3.33
1897	CR1897	CR	2008.09.10 02:00	2008.09.09 22:30	2008.09.09 19:00	2008.09.10 02:00	2008	9	10	02:00	2008.09.10	2008.691485	2008.691086	0							0	None	input	near met. site at Carreg Wen	no	no		no	7	Tuesday	80	2
1898	CR1898	CR	2008.09.10 09:00	2008.09.10 05:10	2008.09.10 02:00	2008.09.10 09:00	2008	9	10	09:00	2008.09.10	2008.692281	2008.691845	0.42857143	-0.3679768	5	-5.208	-26.704			3	None	input	near met. site at Carreg Wen	yes	yes	no	no	14	Wednesday	80	3	-5.208	-26.704	5
1899	CR1899	CR	2008.09.10 16:00	2008.09.10 12:30	2008.09.10 09:00	2008.09.10 16:00	2008	9	10	16:00	2008.09.10	2008.693078	2008.69268	0							0	None	input	near met. site at Carreg Wen	no	no		no	7	Wednesday	80	4
1900	CR1900	CR	2008.09.10 23:00	2008.09.10 21:43	2008.09.10 16:00	2008.09.10 23:00	2008	9	10	23:00	2008.09.10	2008.693875	2008.69373	0.64285714	-0.1918855	1.16	-2.772	-12.434			4.5	None	input	near met. site at Carreg Wen	yes	yes	no	no	14	Wednesday	80	5	-2.772	-12.434	1.16
1901	CR1901	CR	2008.09.11 06:00	2008.09.11 00:00	2008.09.10 23:00	2008.09.11 06:00	2008	9	11	06:00	2008.09.11	2008.694672	2008.693989	0.14285714	-0.845098	2.07	-2.912	-12.973			1	None	input	near met. site at Carreg Wen	yes	yes	no	no	7	Wednesday	80	6	-2.912	-12.973	2.07
1902	CR1902	CR	2008.09.11 13:00	2008.09.11 10:15	2008.09.11 06:00	2008.09.11 13:00	2008	9	11	13:00	2008.09.11	2008.695469	2008.695156	0.28571429	-0.544068	16.6	-3.512	-19.865			2	None	input	near met. site at Carreg Wen	yes	yes	no	no	7	Thursday	80	7	-3.512	-19.865	16.6
1903	CR1903	CR	2008.09.11 20:00	2008.09.11 17:51	2008.09.11 13:00	2008.09.11 20:00	2008	9	11	20:00	2008.09.11	2008.696266	2008.696023	1.57142857	0.19629465	0.63	-7.385	-46.927			11	None	input	near met. site at Carreg Wen	yes	yes	no	no	7	Thursday	80	8	-7.385	-46.927	0.63
1904	CR1904	CR	2008.09.12 03:00	2008.09.12 00:00	2008.09.11 20:00	2008.09.12 03:00	2008	9	12	03:00	2008.09.12	2008.697063	2008.696721	0.42857143	-0.3679768						3	None	input	near met. site at Carreg Wen	yes	no		no	7	Thursday	80	9
1905	CR1905	CR	2008.09.12 10:00	2008.09.12 06:30	2008.09.12 03:00	2008.09.12 10:00	2008	9	12	10:00	2008.09.12	2008.69786	2008.697461	0		3.61	-5.951	-33.999			0	None	input	near met. site at Carreg Wen	yes	yes	no	no	7	Friday	80	10	-5.951	-33.999	3.61
1906	CR1906	CR	2008.09.12 17:00	2008.09.12 13:30	2008.09.12 10:00	2008.09.12 17:00	2008	9	12	17:00	2008.09.12	2008.698657	2008.698258	0							0	None	input	near met. site at Carreg Wen	yes	no		no	7	Friday	80	11
1907	CR1907	CR	2008.09.13 00:00	2008.09.12 20:30	2008.09.12 17:00	2008.09.13 00:00	2008	9	13	00:00	2008.09.13	2008.699454	2008.699055	0							0	None	input	near met. site at Carreg Wen	yes	no		no	7	Friday	80	12
1908	CR1908	CR	2008.09.13 07:00	2008.09.13 03:30	2008.09.13 00:00	2008.09.13 07:00	2008	9	13	07:00	2008.09.13	2008.700251	2008.699852	0							0	None	input	near met. site at Carreg Wen	yes	no		no	7	Saturday	80	13
1909	CR1909	CR	2008.09.13 14:00	2008.09.13 10:30	2008.09.13 07:00	2008.09.13 14:00	2008	9	13	14:00	2008.09.13	2008.701047	2008.700649	0							0	None	input	near met. site at Carreg Wen	yes	no		no	7	Saturday	80	14
1910	CR1910	CR	2008.09.13 21:00	2008.09.13 17:30	2008.09.13 14:00	2008.09.13 21:00	2008	9	13	21:00	2008.09.13	2008.701844	2008.701446	0							0	None	input	near met. site at Carreg Wen	yes	no		no	7	Saturday	80	15
1911	CR1911	CR	2008.09.14 04:00	2008.09.14 00:30	2008.09.13 21:00	2008.09.14 04:00	2008	9	14	04:00	2008.09.14	2008.702641	2008.702243	0							0	None	input	near met. site at Carreg Wen	yes	no		no	7	Saturday	80	16
1912	CR1912	CR	2008.09.14 11:00	2008.09.14 07:30	2008.09.14 04:00	2008.09.14 11:00	2008	9	14	11:00	2008.09.14	2008.703438	2008.70304	0							0	None	input	near met. site at Carreg Wen	yes	no		no	7	Sunday	80	17
1913	CR1913	CR	2008.09.14 18:00	2008.09.14 14:30	2008.09.14 11:00	2008.09.14 18:00	2008	9	14	18:00	2008.09.14	2008.704235	2008.703837	0							0	None	input	near met. site at Carreg Wen	yes	no		no	7	Sunday	80	18
1914	CR1914	CR	2008.09.15 01:00	2008.09.14 22:30	2008.09.14 18:00	2008.09.15 01:00	2008	9	15	01:00	2008.09.15	2008.705032	2008.704747	0.5	-0.30103	4.49	-6.154	-37.281			3.5	None	input	near met. site at Carreg Wen	yes	yes	no	no	7	Sunday	80	19	-6.154	-37.281	4.49
1915	CR1915	CR	2008.09.15 08:00	2008.09.15 03:30	2008.09.15 01:00	2008.09.15 08:00	2008	9	15	08:00	2008.09.15	2008.705829	2008.705317	0.35714286	-0.447158	2.35	-5.895	-32.047			2.5	None	input	near met. site at Carreg Wen	yes	yes	no	no	7	Monday	80	20	-5.895	-32.047	2.35
1916	CR1916	CR	2008.09.15 15:00	2008.09.15 12:00	2008.09.15 08:00	2008.09.15 15:00	2008	9	15	15:00	2008.09.15	2008.706626	2008.706284	0.14285714	-0.845098	4.74					1	None	input	near met. site at Carreg Wen	yes	no		no	7	Monday	80	21			4.74
1917	CR1917	CR	2008.09.15 22:00	2008.09.15 18:30	2008.09.15 15:00	2008.09.15 22:00	2008	9	15	22:00	2008.09.15	2008.707423	2008.707024	0		1.19					0	None	input	near met. site at Carreg Wen	yes	no		no	7	Monday	80	22			1.19
1918	CR1918	CR	2008.09.16 05:00	2008.09.16 02:30	2008.09.15 22:00	2008.09.16 05:00	2008	9	16	05:00	2008.09.16	2008.70822	2008.707935	0.14285714	-0.845098	2.3					1	None	input	near met. site at Carreg Wen	yes	no		no	7	Monday	80	23			2.3
1919	CR1919	CR	2008.09.16 12:00	2008.09.16 08:18	2008.09.16 05:00	2008.09.16 12:00	2008	9	16	12:00	2008.09.16	2008.709016	2008.708595	0.35714286	-0.447158	1.05	-6.498	-33.942			2.5	Light rain at change over	input	near met. site at Carreg Wen	yes	yes	no	no	7	Tuesday	80	24	-6.498	-33.942	1.05
1920	CR1920	CR	2008.09.16 19:00	2008.09.16 17:30	2008.09.16 12:00	2008.09.16 19:00	2008	9	16	19:00	2008.09.16	2008.709813	2008.709643	0.21428571	-0.6690068	7.96					1.5	None	input	near met. site at Carreg Wen	yes	no		no	7	Tuesday	81	1			7.96
1921	CR1921	CR	2008.09.17 02:00	2008.09.16 20:30	2008.09.16 19:00	2008.09.17 02:00	2008	9	17	02:00	2008.09.17	2008.71061	2008.709984	0.07142857	-1.146128	2.3	-6.56	-35.444			0.5	None	input	near met. site at Carreg Wen	yes	yes	no	no	7	Tuesday	81	2	-6.56	-35.444	2.3
1922	CR1922	CR	2008.09.17 09:00	2008.09.17 04:15	2008.09.17 02:00	2008.09.17 09:00	2008	9	17	09:00	2008.09.17	2008.711407	2008.710866	0.28571429	-0.544068	1.44	-6.725	-35.312			2	None	input	near met. site at Carreg Wen	yes	yes	no	no	7	Wednesday	81	3	-6.725	-35.312	1.44
1923	CR1923	CR	2008.09.17 16:00	2008.09.17 12:30	2008.09.17 09:00	2008.09.17 16:00	2008	9	17	16:00	2008.09.17	2008.712204	2008.711806	0							0	None	input	near met. site at Carreg Wen	no	no		no	7	Wednesday	81	4
1924	CR1924	CR	2008.09.17 23:00	2008.09.17 19:30	2008.09.17 16:00	2008.09.17 23:00	2008	9	17	23:00	2008.09.17	2008.713001	2008.712603	0							0	None	input	near met. site at Carreg Wen	no	no		no	14	Wednesday	81	5
1925	CR1925	CR	2008.09.18 06:00	2008.09.18 02:30	2008.09.17 23:00	2008.09.18 06:00	2008	9	18	06:00	2008.09.18	2008.713798	2008.713399	0							0	None	input	near met. site at Carreg Wen	no	no		no	21	Wednesday	81	6
1926	CR1926	CR	2008.09.18 13:00	2008.09.18 09:30	2008.09.18 06:00	2008.09.18 13:00	2008	9	18	13:00	2008.09.18	2008.714595	2008.714196	0							0	None	input	near met. site at Carreg Wen	no	no		no	28	Thursday	81	7
1927	CR1927	CR	2008.09.18 20:00	2008.09.18 16:30	2008.09.18 13:00	2008.09.18 20:00	2008	9	18	20:00	2008.09.18	2008.715392	2008.714993	0							0	None	input	near met. site at Carreg Wen	no	no		no	35	Thursday	81	8
1928	CR1928	CR	2008.09.19 03:00	2008.09.18 23:30	2008.09.18 20:00	2008.09.19 03:00	2008	9	19	03:00	2008.09.19	2008.716189	2008.71579	0							0	None	input	near met. site at Carreg Wen	no	no		no	42	Thursday	81	9
1929	CR1929	CR	2008.09.19 10:00	2008.09.19 06:30	2008.09.19 03:00	2008.09.19 10:00	2008	9	19	10:00	2008.09.19	2008.716985	2008.716587	0							0	None	input	near met. site at Carreg Wen	no	no		no	49	Friday	81	10
1930	CR1930	CR	2008.09.19 17:00	2008.09.19 13:30	2008.09.19 10:00	2008.09.19 17:00	2008	9	19	17:00	2008.09.19	2008.717782	2008.717384	0							0	None	input	near met. site at Carreg Wen	no	no		no	56	Friday	81	11
1931	CR1931	CR	2008.09.20 00:00	2008.09.19 20:30	2008.09.19 17:00	2008.09.20 00:00	2008	9	20	00:00	2008.09.20	2008.718579	2008.718181	0							0	None	input	near met. site at Carreg Wen	no	no		no	63	Friday	81	12
1932	CR1932	CR	2008.09.20 07:00	2008.09.20 00:30	2008.09.20 00:00	2008.09.20 07:00	2008	9	20	07:00	2008.09.20	2008.719376	2008.718636	0.07142857	-1.146128						0.5	None	input	near met. site at Carreg Wen	no	no		no	70	Saturday	81	13
1933	CR1933	CR	2008.09.20 14:00	2008.09.20 10:30	2008.09.20 07:00	2008.09.20 14:00	2008	9	20	14:00	2008.09.20	2008.720173	2008.719775	0							0	None	input	near met. site at Carreg Wen	no	no		no	77	Saturday	81	14
1934	CR1934	CR	2008.09.20 21:00	2008.09.20 17:30	2008.09.20 14:00	2008.09.20 21:00	2008	9	20	21:00	2008.09.20	2008.72097	2008.720572	0							0	None	input	near met. site at Carreg Wen	no	no		no	84	Saturday	81	15
1935	CR1935	CR	2008.09.21 04:00	2008.09.21 00:30	2008.09.20 21:00	2008.09.21 04:00	2008	9	21	04:00	2008.09.21	2008.721767	2008.721368	0							0	None	input	near met. site at Carreg Wen	no	no		no	91	Saturday	81	16
1936	CR1936	CR	2008.09.21 11:00	2008.09.21 07:30	2008.09.21 04:00	2008.09.21 11:00	2008	9	21	11:00	2008.09.21	2008.722564	2008.722165	0							0	None	input	near met. site at Carreg Wen	no	no		no	98	Sunday	81	17
1937	CR1937	CR	2008.09.21 18:00	2008.09.21 14:30	2008.09.21 11:00	2008.09.21 18:00	2008	9	21	18:00	2008.09.21	2008.723361	2008.722962	0							0	None	input	near met. site at Carreg Wen	no	no		no	105	Sunday	81	18
1938	CR1938	CR	2008.09.22 01:00	2008.09.21 21:30	2008.09.21 18:00	2008.09.22 01:00	2008	9	22	01:00	2008.09.22	2008.724158	2008.723759	0							0	None	input	near met. site at Carreg Wen	no	no		no	112	Sunday	81	19
1939	CR1939	CR	2008.09.22 08:00	2008.09.22 04:30	2008.09.22 01:00	2008.09.22 08:00	2008	9	22	08:00	2008.09.22	2008.724955	2008.724556	0							0	None	input	near met. site at Carreg Wen	no	no		no	119	Monday	81	20
1940	CR1940	CR	2008.09.22 15:00	2008.09.22 11:30	2008.09.22 08:00	2008.09.22 15:00	2008	9	22	15:00	2008.09.22	2008.725751	2008.725353	0							0	None	input	near met. site at Carreg Wen	no	no		no	126	Monday	81	21
1941	CR1941	CR	2008.09.22 22:00	2008.09.22 18:30	2008.09.22 15:00	2008.09.22 22:00	2008	9	22	22:00	2008.09.22	2008.726548	2008.72615	0							0	None	input	near met. site at Carreg Wen	no	no		no	133	Monday	81	22
1942	CR1942	CR	2008.09.23 05:00	2008.09.23 01:30	2008.09.22 22:00	2008.09.23 05:00	2008	9	23	05:00	2008.09.23	2008.727345	2008.726947	0							0	None	input	near met. site at Carreg Wen	no	no		no	140	Monday	81	23
1943	CR1943	CR	2008.09.23 12:00	2008.09.23 11:30	2008.09.23 05:00	2008.09.23 12:00	2008	9	23	12:00	2008.09.23	2008.728142	2008.728085	0.07142857	-1.146128	3.89					0.5	Light drizzle at changeover.	input	near met. site at Carreg Wen	yes	no		no	147	Tuesday	81	24			3.89
1944	CR1944	CR	2008.09.23 19:00	2008.09.23 15:30	2008.09.23 12:00	2008.09.23 19:00	2008	9	23	19:00	2008.09.23	2008.728939	2008.728541	0		20.4					0	20 mls only	input	near met. site at Carreg Wen	yes	no		no	7	Tuesday	82	1			20.4
1945	CR1945	CR	2008.09.24 02:00	2008.09.23 22:30	2008.09.23 19:00	2008.09.24 02:00	2008	9	24	02:00	2008.09.24	2008.729736	2008.729337	0							0	None	input	near met. site at Carreg Wen	no	no		no	7	Tuesday	82	2
1946	CR1946	CR	2008.09.24 09:00	2008.09.24 05:30	2008.09.24 02:00	2008.09.24 09:00	2008	9	24	09:00	2008.09.24	2008.730533	2008.730134	0							0	None	input	near met. site at Carreg Wen	no	no		no	14	Wednesday	82	3
1947	CR1947	CR	2008.09.24 16:00	2008.09.24 12:30	2008.09.24 09:00	2008.09.24 16:00	2008	9	24	16:00	2008.09.24	2008.73133	2008.730931	0							0	None	input	near met. site at Carreg Wen	no	no		no	21	Wednesday	82	4
1948	CR1948	CR	2008.09.24 23:00	2008.09.24 19:30	2008.09.24 16:00	2008.09.24 23:00	2008	9	24	23:00	2008.09.24	2008.732127	2008.731728	0							0	None	input	near met. site at Carreg Wen	no	no		no	28	Wednesday	82	5
1949	CR1949	CR	2008.09.25 06:00	2008.09.25 02:30	2008.09.24 23:00	2008.09.25 06:00	2008	9	25	06:00	2008.09.25	2008.732924	2008.732525	0							0	None	input	near met. site at Carreg Wen	no	no		no	35	Wednesday	82	6
1950	CR1950	CR	2008.09.25 13:00	2008.09.25 09:30	2008.09.25 06:00	2008.09.25 13:00	2008	9	25	13:00	2008.09.25	2008.73372	2008.733322	0		1.6	-11.271	-79.89			0	None	input	near met. site at Carreg Wen	yes	yes	no	no	42	Thursday	82	7	-11.271	-79.89	1.6
1951	CR1951	CR	2008.09.25 20:00	2008.09.25 16:30	2008.09.25 13:00	2008.09.25 20:00	2008	9	25	20:00	2008.09.25	2008.734517	2008.734119	0							0	None	input	near met. site at Carreg Wen	no	no		no	7	Thursday	82	8
1952	CR1952	CR	2008.09.26 03:00	2008.09.25 23:30	2008.09.25 20:00	2008.09.26 03:00	2008	9	26	03:00	2008.09.26	2008.735314	2008.734916	0							0	None	input	near met. site at Carreg Wen	no	no		no	14	Thursday	82	9
1953	CR1953	CR	2008.09.26 10:00	2008.09.26 06:30	2008.09.26 03:00	2008.09.26 10:00	2008	9	26	10:00	2008.09.26	2008.736111	2008.735713	0							0	None	input	near met. site at Carreg Wen	no	no		no	21	Friday	82	10
1954	CR1954	CR	2008.09.26 17:00	2008.09.26 13:30	2008.09.26 10:00	2008.09.26 17:00	2008	9	26	17:00	2008.09.26	2008.736908	2008.73651	0							0	None	input	near met. site at Carreg Wen	no	no		no	28	Friday	82	11
1955	CR1955	CR	2008.09.27 00:00	2008.09.26 20:30	2008.09.26 17:00	2008.09.27 00:00	2008	9	27	00:00	2008.09.27	2008.737705	2008.737307	0							0	None	input	near met. site at Carreg Wen	no	no		no	35	Friday	82	12
1956	CR1956	CR	2008.09.27 07:00	2008.09.27 03:30	2008.09.27 00:00	2008.09.27 07:00	2008	9	27	07:00	2008.09.27	2008.738502	2008.738103	0							0	None	input	near met. site at Carreg Wen	no	no		no	42	Saturday	82	13
1957	CR1957	CR	2008.09.27 14:00	2008.09.27 11:30	2008.09.27 07:00	2008.09.27 14:00	2008	9	27	14:00	2008.09.27	2008.739299	2008.739014	0.07142857	-1.146128						0.5	None	input	near met. site at Carreg Wen	no	no		no	49	Saturday	82	14
1958	CR1958	CR	2008.09.27 21:00	2008.09.27 17:30	2008.09.27 14:00	2008.09.27 21:00	2008	9	27	21:00	2008.09.27	2008.740096	2008.739697	0							0	None	input	near met. site at Carreg Wen	no	no		no	56	Saturday	82	15
1959	CR1959	CR	2008.09.28 04:00	2008.09.28 00:30	2008.09.27 21:00	2008.09.28 04:00	2008	9	28	04:00	2008.09.28	2008.740893	2008.740494	0							0	Trace sample only - no samples taken	input	near met. site at Carreg Wen	no	no		no	63	Saturday	82	16
1960	CR1960	CR	2008.09.28 11:00	2008.09.28 07:30	2008.09.28 04:00	2008.09.28 11:00	2008	9	28	11:00	2008.09.28	2008.741689	2008.741291	0							0	None	input	near met. site at Carreg Wen	no	no		no	70	Sunday	82	17
1961	CR1961	CR	2008.09.28 18:00	2008.09.28 13:30	2008.09.28 11:00	2008.09.28 18:00	2008	9	28	18:00	2008.09.28	2008.742486	2008.741974	0.07142857	-1.146128	14.4					0.5	3/4 full	input	near met. site at Carreg Wen	yes	no		no	77	Sunday	82	18			14.4
1962	CR1962	CR	2008.09.29 01:00	2008.09.28 21:30	2008.09.28 18:00	2008.09.29 01:00	2008	9	29	01:00	2008.09.29	2008.743283	2008.742885	0		11.3					0	3/4 full	input	near met. site at Carreg Wen	yes	no		no	7	Sunday	82	19			11.3
1963	CR1963	CR	2008.09.29 08:00	2008.09.29 01:30	2008.09.29 01:00	2008.09.29 08:00	2008	9	29	08:00	2008.09.29	2008.74408	2008.74334	0.07142857	-1.146128	15.2					0.5	None	input	near met. site at Carreg Wen	yes	no		no	7	Monday	82	20			15.2
1964	CR1964	CR	2008.09.29 15:00	2008.09.29 12:30	2008.09.29 08:00	2008.09.29 15:00	2008	9	29	15:00	2008.09.29	2008.744877	2008.744592	0.5	-0.30103	3.36	-4.292	-22.096			3.5	None	input	near met. site at Carreg Wen	yes	yes	no	no	7	Monday	82	21	-4.292	-22.096	3.36
1965	CR1965	CR	2008.09.29 22:00	2008.09.29 19:40	2008.09.29 15:00	2008.09.29 22:00	2008	9	29	22:00	2008.09.29	2008.745674	2008.745409	1.21428571	0.08432089	4.47	-6.623	-38.395			8.5	None	input	near met. site at Carreg Wen	yes	yes	no	no	7	Monday	82	22	-6.623	-38.395	4.47
1966	CR1966	CR	2008.09.30 05:00	2008.09.30 01:34	2008.09.29 22:00	2008.09.30 05:00	2008	9	30	05:00	2008.09.30	2008.746471	2008.746082	4.42857143	0.64626365	2.14	-8.754	-57.775			31	None	input	near met. site at Carreg Wen	yes	yes	no	no	7	Monday	82	23	-8.754	-57.775	2.14
1967	CR1967	CR	2008.09.30 12:00	2008.09.30 08:11	2008.09.30 05:00	2008.09.30 12:00	2008	9	30	12:00	2008.09.30	2008.747268	2008.746834	3.85714286	0.58626572	5.75	-10.474	-72.93			27	None	input	near met. site at Carreg Wen	yes	yes	no	no	7	Tuesday	82	24	-10.474	-72.93	5.75
1968	CR1968	CR	2008.09.30 19:00	2008.09.30 13:52	2008.09.30 12:00	2008.09.30 19:00	2008	9	30	19:00	2008.09.30	2008.748065	2008.74748	2.14285714	0.33099322						15	None	input	near met. site at Carreg Wen	yes	no		no	7	Tuesday	83	1
1969	CR1969	CR	2008.10.01 02:00	2008.09.30 23:07	2008.09.30 19:00	2008.10.01 02:00	2008	10	1	02:00	2008.10.01	2008.748862	2008.748534	1.71428571	0.23408321	8.83	-7.476	-49.068			12	None	input	near met. site at Carreg Wen	yes	yes	no	no	7	Tuesday	83	2	-7.476	-49.068	8.83
1970	CR1970	CR	2008.10.01 09:00	2008.10.01 05:55	2008.10.01 02:00	2008.10.01 09:00	2008	10	1	09:00	2008.10.01	2008.749659	2008.749308	0.85714286	-0.0669468	27.7	-6.442	-34.386			6	None	input	near met. site at Carreg Wen	yes	yes	no	yes	7	Wednesday	83	3	-6.442	-34.386	27.7
1971	CR1971	CR	2008.10.01 16:00	2008.10.01 13:15	2008.10.01 09:00	2008.10.01 16:00	2008	10	1	16:00	2008.10.01	2008.750455	2008.750142	0.28571429	-0.544068	25.9	-8.281	-40.515			2	None	input	near met. site at Carreg Wen	yes	yes	no	no	7	Wednesday	83	4	-8.281	-40.515	25.9
1972	CR1972	CR	2008.10.01 23:00	2008.10.01 20:33	2008.10.01 16:00	2008.10.01 23:00	2008	10	1	23:00	2008.10.01	2008.751252	2008.750975	1.14285714	0.05799195	7.52	-9.119	-47.993			8	None	input	near met. site at Carreg Wen	yes	yes	no	no	7	Wednesday	83	5	-9.119	-47.993	7.52
1973	CR1973	CR	2008.10.02 06:00	2008.10.02 01:06	2008.10.01 23:00	2008.10.02 06:00	2008	10	2	06:00	2008.10.02	2008.752049	2008.751491	0.71428571	-0.146128	7.45	-7.594	-34.274			5	None	input	near met. site at Carreg Wen	yes	yes	no	no	7	Wednesday	83	6	-7.594	-34.274	7.45
1974	CR1974	CR	2008.10.02 13:00	2008.10.02 06:30	2008.10.02 06:00	2008.10.02 13:00	2008	10	2	13:00	2008.10.02	2008.752846	2008.752106	0.14285714	-0.845098	8.24	-7.003	-33.729			1	None	input	near met. site at Carreg Wen	yes	yes	no	no	7	Thursday	83	7	-7.003	-33.729	8.24
1975	CR1975	CR	2008.10.02 20:00	2008.10.02 16:20	2008.10.02 13:00	2008.10.02 20:00	2008	10	2	20:00	2008.10.02	2008.753643	2008.753227	0.92857143	-0.0321847	6.16	-10.748	-63.578			6.5	None	input	near met. site at Carreg Wen	yes	yes	no	no	7	Thursday	83	8	-10.748	-63.578	6.16
1976	CR1976	CR	2008.10.03 03:00	2008.10.02 22:30	2008.10.02 20:00	2008.10.03 03:00	2008	10	3	03:00	2008.10.03	2008.75444	2008.753928	1.78571429	0.25181197	2	-14.082	-87.005			12.5	None	input	near met. site at Carreg Wen	yes	yes	no	no	7	Thursday	83	9	-14.082	-87.005	2
1977	CR1977	CR	2008.10.03 10:00	2008.10.03 09:00	2008.10.03 03:00	2008.10.03 10:00	2008	10	3	10:00	2008.10.03	2008.755237	2008.755123	0.28571429	-0.544068	20.7	-8.183	-39.633			2	None	input	near met. site at Carreg Wen	yes	yes	no	no	7	Friday	83	10	-8.183	-39.633	20.7
1978	CR1978	CR	2008.10.03 17:00	2008.10.03 13:30	2008.10.03 10:00	2008.10.03 17:00	2008	10	3	17:00	2008.10.03	2008.756034	2008.755635	0		8.07					0	None	input	near met. site at Carreg Wen	yes	no		no	7	Friday	83	11			8.07
1979	CR1979	CR	2008.10.04 00:00	2008.10.03 20:30	2008.10.03 17:00	2008.10.04 00:00	2008	10	4	00:00	2008.10.04	2008.756831	2008.756432	0							0	None	input	near met. site at Carreg Wen	yes	no		no	7	Friday	83	12
1980	CR1980	CR	2008.10.04 07:00	2008.10.04 06:30	2008.10.04 00:00	2008.10.04 07:00	2008	10	4	07:00	2008.10.04	2008.757628	2008.757571	0.14285714	-0.845098	11.5	-5.299	-15.755			1	None	input	near met. site at Carreg Wen	yes	yes	no	no	7	Saturday	83	13	-5.299	-15.755	11.5
1981	CR1981	CR	2008.10.04 14:00	2008.10.04 11:25	2008.10.04 07:00	2008.10.04 14:00	2008	10	4	14:00	2008.10.04	2008.758424	2008.758131	1.92857143	0.28523573	2.22	-5.316	-20.573			13.5	None	input	near met. site at Carreg Wen	yes	yes	no	no	7	Saturday	83	14	-5.316	-20.573	2.22
1982	CR1982	CR	2008.10.04 21:00	2008.10.04 17:36	2008.10.04 14:00	2008.10.04 21:00	2008	10	4	21:00	2008.10.04	2008.759221	2008.758835	4.78571429	0.67994677	0.28	-9.601	-62.132			33.5	None	input	near met. site at Carreg Wen	yes	yes	no	no	7	Saturday	83	15	-9.601	-62.132	0.28
1983	CR1983	CR	2008.10.05 04:00	2008.10.05 00:53	2008.10.04 21:00	2008.10.05 04:00	2008	10	5	04:00	2008.10.05	2008.760018	2008.759664	6.78571429	0.83159557	0.32	-7.43	-49.774			47.5	None	input	near met. site at Carreg Wen	yes	yes	no	no	7	Saturday	83	16	-7.43	-49.774	0.32
1984	CR1984	CR	2008.10.05 11:00	2008.10.05 05:20	2008.10.05 04:00	2008.10.05 11:00	2008	10	5	11:00	2008.10.05	2008.760815	2008.76017	2.57142857	0.41017447	0.55	-16.012	-115.308			18	None	input	near met. site at Carreg Wen	yes	yes	no	no	7	Sunday	83	17	-16.012	-115.308	0.55
1985	CR1985	CR	2008.10.05 18:00	2008.10.05 14:30	2008.10.05 11:00	2008.10.05 18:00	2008	10	5	18:00	2008.10.05	2008.761612	2008.761214	0							0	None	input	near met. site at Carreg Wen	yes	no		no	7	Sunday	83	18
1986	CR1986	CR	2008.10.06 01:00	2008.10.05 21:30	2008.10.05 18:00	2008.10.06 01:00	2008	10	6	01:00	2008.10.06	2008.762409	2008.762011	0							0	None	input	near met. site at Carreg Wen	yes	no		no	7	Sunday	83	19
1987	CR1987	CR	2008.10.06 08:00	2008.10.06 04:30	2008.10.06 01:00	2008.10.06 08:00	2008	10	6	08:00	2008.10.06	2008.763206	2008.762807	0							0	None	input	near met. site at Carreg Wen	yes	no		no	7	Monday	83	20
1988	CR1988	CR	2008.10.06 15:00	2008.10.06 11:30	2008.10.06 08:00	2008.10.06 15:00	2008	10	6	15:00	2008.10.06	2008.764003	2008.763604	0							0	None	input	near met. site at Carreg Wen	yes	no		no	7	Monday	83	21
1989	CR1989	CR	2008.10.06 22:00	2008.10.06 15:30	2008.10.06 15:00	2008.10.06 22:00	2008	10	6	22:00	2008.10.06	2008.7648	2008.76406	0.07142857	-1.146128						0.5	None	input	near met. site at Carreg Wen	yes	no		no	7	Monday	83	22
1990	CR1990	CR	2008.10.07 05:00	2008.10.07 02:30	2008.10.06 22:00	2008.10.07 05:00	2008	10	7	05:00	2008.10.07	2008.765597	2008.765312	0.28571429	-0.544068	2.6	-4.484	-26.924			2	None	input	near met. site at Carreg Wen	yes	yes	no	no	7	Monday	83	23	-4.484	-26.924	2.6
1991	CR1991	CR	2008.10.07 12:00	2008.10.07 09:19	2008.10.07 05:00	2008.10.07 12:00	2008	10	7	12:00	2008.10.07	2008.766393	2008.766088	2.35714286	0.3723859	0.94	-6.253	-38.895			16.5	Heavy rain at change over	input	near met. site at Carreg Wen	yes	yes	no	no	7	Tuesday	83	24	-6.253	-38.895	0.94
1992	CR1992	CR	2008.10.07 19:00	2008.10.07 15:19	2008.10.07 12:00	2008.10.07 19:00	2008	10	7	19:00	2008.10.07	2008.76719	2008.766772	1.21428571	0.08432089	5.68	-17.24	-118.087			8.5	None	input	near met. site at Carreg Wen	yes	yes	no	no	7	Tuesday	84	1	-17.24	-118.087	5.68
1993	CR1993	CR	2008.10.08 02:00	2008.10.07 22:30	2008.10.07 19:00	2008.10.08 02:00	2008	10	8	02:00	2008.10.08	2008.767987	2008.767589	0							0	None	input	near met. site at Carreg Wen	yes	no		no	7	Tuesday	84	2
1994	CR1994	CR	2008.10.08 09:00	2008.10.08 05:30	2008.10.08 02:00	2008.10.08 09:00	2008	10	8	09:00	2008.10.08	2008.768784	2008.768386	0							0	None	input	near met. site at Carreg Wen	yes	no		no	7	Wednesday	84	3
1995	CR1995	CR	2008.10.08 16:00	2008.10.08 12:30	2008.10.08 09:00	2008.10.08 16:00	2008	10	8	16:00	2008.10.08	2008.769581	2008.769183	0							0	None	input	near met. site at Carreg Wen	yes	no		no	7	Wednesday	84	4
1996	CR1996	CR	2008.10.08 23:00	2008.10.08 19:30	2008.10.08 16:00	2008.10.08 23:00	2008	10	8	23:00	2008.10.08	2008.770378	2008.76998	0							0	None	input	near met. site at Carreg Wen	yes	no		no	7	Wednesday	84	5
1997	CR1997	CR	2008.10.09 06:00	2008.10.09 02:30	2008.10.08 23:00	2008.10.09 06:00	2008	10	9	06:00	2008.10.09	2008.771175	2008.770776	0.07142857	-1.146128						0.5	None	input	near met. site at Carreg Wen	yes	no		no	7	Wednesday	84	6
1998	CR1998	CR	2008.10.09 13:00	2008.10.09 09:30	2008.10.09 06:00	2008.10.09 13:00	2008	10	9	13:00	2008.10.09	2008.771972	2008.771573	0							0	None	input	near met. site at Carreg Wen	yes	no		no	7	Thursday	84	7
1999	CR1999	CR	2008.10.09 20:00	2008.10.09 16:30	2008.10.09 13:00	2008.10.09 20:00	2008	10	9	20:00	2008.10.09	2008.772769	2008.77237	0							0	None	input	near met. site at Carreg Wen	yes	no		no	7	Thursday	84	8
2000	CR2000	CR	2008.10.10 03:00	2008.10.09 23:30	2008.10.09 20:00	2008.10.10 03:00	2008	10	10	03:00	2008.10.10	2008.773566	2008.773167	0							0	None	input	near met. site at Carreg Wen	yes	no		no	7	Thursday	84	9
2001	CR2001	CR	2008.10.10 10:00	2008.10.10 09:30	2008.10.10 03:00	2008.10.10 10:00	2008	10	10	10:00	2008.10.10	2008.774363	2008.774306	0.14285714	-0.845098	15.5					1	None	input	near met. site at Carreg Wen	yes	no		yes	7	Friday	84	10			15.5
2002	CR2002	CR	2008.10.10 17:00	2008.10.10 14:07	2008.10.10 10:00	2008.10.10 17:00	2008	10	10	17:00	2008.10.10	2008.775159	2008.774833	1.35714286	0.13262557	1.21	-3.093	-12.052			9.5	None	input	near met. site at Carreg Wen	yes	yes	no	no	7	Friday	84	11	-3.093	-12.052	1.21
2003	CR2003	CR	2008.10.11 00:00	2008.10.10 20:48	2008.10.10 17:00	2008.10.11 00:00	2008	10	11	00:00	2008.10.11	2008.775956	2008.775593	1.85714286	0.26884531	0.37	-3.039	-9.254			13	None	input	near met. site at Carreg Wen	yes	yes	no	no	7	Friday	84	12	-3.039	-9.254	0.37
2004	CR2004	CR	2008.10.11 07:00	2008.10.11 03:43	2008.10.11 00:00	2008.10.11 07:00	2008	10	11	07:00	2008.10.11	2008.776753	2008.776381	1.57142857	0.19629465	0.7	-2.813	-6.505			11	None	input	near met. site at Carreg Wen	yes	yes	no	no	7	Saturday	84	13	-2.813	-6.505	0.7
2005	CR2005	CR	2008.10.11 14:00	2008.10.11 10:10	2008.10.11 07:00	2008.10.11 14:00	2008	10	11	14:00	2008.10.11	2008.77755	2008.777114	0.42857143	-0.3679768	1.7	-1.551	-2.309			3	None	input	near met. site at Carreg Wen	yes	yes	no	no	7	Saturday	84	14	-1.551	-2.309	1.7
2006	CR2006	CR	2008.10.11 21:00	2008.10.11 17:10	2008.10.11 14:00	2008.10.11 21:00	2008	10	11	21:00	2008.10.11	2008.778347	2008.777911	0.21428571	-0.6690068	3.57	-2.744	-7.263			1.5	None	input	near met. site at Carreg Wen	yes	yes	no	no	7	Saturday	84	15	-2.744	-7.263	3.57
2007	CR2007	CR	2008.10.12 04:00	2008.10.11 22:30	2008.10.11 21:00	2008.10.12 04:00	2008	10	12	04:00	2008.10.12	2008.779144	2008.778518	0.07142857	-1.146128	1.69					0.5	None	input	near met. site at Carreg Wen	yes	no		no	7	Saturday	84	16			1.69
2008	CR2008	CR	2008.10.12 11:00	2008.10.12 07:30	2008.10.12 04:00	2008.10.12 11:00	2008	10	12	11:00	2008.10.12	2008.779941	2008.779542	0							0	None	input	near met. site at Carreg Wen	yes	no		no	7	Sunday	84	17
2009	CR2009	CR	2008.10.12 18:00	2008.10.12 14:30	2008.10.12 11:00	2008.10.12 18:00	2008	10	12	18:00	2008.10.12	2008.780738	2008.780339	0							0	None	input	near met. site at Carreg Wen	yes	no		no	7	Sunday	84	18
2010	CR2010	CR	2008.10.13 01:00	2008.10.12 22:30	2008.10.12 18:00	2008.10.13 01:00	2008	10	13	01:00	2008.10.13	2008.781535	2008.78125	0.07142857	-1.146128						0.5	None	input	near met. site at Carreg Wen	yes	no		no	7	Sunday	84	19
2011	CR2011	CR	2008.10.13 08:00	2008.10.13 05:10	2008.10.13 01:00	2008.10.13 08:00	2008	10	13	08:00	2008.10.13	2008.782332	2008.782009	0.21428571	-0.6690068	2.65	-3.07	-12.443			1.5	None	input	near met. site at Carreg Wen	yes	yes	no	no	7	Monday	84	20	-3.07	-12.443	2.65
2012	CR2012	CR	2008.10.13 15:00	2008.10.13 08:30	2008.10.13 08:00	2008.10.13 15:00	2008	10	13	15:00	2008.10.13	2008.783128	2008.782388	0.07142857	-1.146128	7.63					0.5	None	input	near met. site at Carreg Wen	yes	no		no	7	Monday	84	21			7.63
2013	CR2013	CR	2008.10.13 22:00	2008.10.13 20:50	2008.10.13 15:00	2008.10.13 22:00	2008	10	13	22:00	2008.10.13	2008.783925	2008.783793	0.42857143	-0.3679768	4.04	-2.716	-9.18			3	None	input	near met. site at Carreg Wen	yes	yes	no	no	7	Monday	84	22	-2.716	-9.18	4.04
2014	CR2014	CR	2008.10.14 05:00	2008.10.14 00:47	2008.10.13 22:00	2008.10.14 05:00	2008	10	14	05:00	2008.10.14	2008.784722	2008.784243	0.5	-0.30103	2.05	-3.234	-12.715			3.5	None	input	near met. site at Carreg Wen	yes	yes	no	no	7	Monday	84	23	-3.234	-12.715	2.05
2015	CR2015	CR	2008.10.14 12:00	2008.10.14 06:50	2008.10.14 05:00	2008.10.14 12:00	2008	10	14	12:00	2008.10.14	2008.785519	2008.784931	0.21428571	-0.6690068	0.78	-8.03	-50.352			1.5	None	input	near met. site at Carreg Wen	yes	yes	no	no	7	Tuesday	84	24	-8.03	-50.352	0.78
2016	CR2016	CR	2008.10.14 19:00	2008.10.14 15:05	2008.10.14 12:00	2008.10.14 19:00	2008	10	14	19:00	2008.10.14	2008.786316	2008.785871	2.64285714	0.42207369	0.33	-7.251	-44.124			18.5	None	input	near met. site at Carreg Wen	yes	yes	no	no	7	Tuesday	85	1	-7.251	-44.124	0.33
2017	CR2017	CR	2008.10.15 02:00	2008.10.14 22:50	2008.10.14 19:00	2008.10.15 02:00	2008	10	15	02:00	2008.10.15	2008.787113	2008.786754	2.07142857	0.31626996	0.39	-4.215	-22.398			14.5	None	input	near met. site at Carreg Wen	yes	yes	no	no	7	Tuesday	85	2	-4.215	-22.398	0.39
2018	CR2018	CR	2008.10.15 09:00	2008.10.15 03:55	2008.10.15 02:00	2008.10.15 09:00	2008	10	15	09:00	2008.10.15	2008.78791	2008.787331	0.85714286	-0.0669468	0.51	-6.67	-41.079			6	None	input	near met. site at Carreg Wen	yes	yes	no	no	7	Wednesday	85	3	-6.67	-41.079	0.51
2019	CR2019	CR	2008.10.15 16:00	2008.10.15 14:45	2008.10.15 09:00	2008.10.15 16:00	2008	10	15	16:00	2008.10.15	2008.788707	2008.788564	0.28571429	-0.544068	2.37	-4.087	-14.334			2	None	input	near met. site at Carreg Wen	yes	yes	no	no	7	Wednesday	85	4	-4.087	-14.334	2.37
2020	CR2020	CR	2008.10.15 23:00	2008.10.15 19:10	2008.10.15 16:00	2008.10.15 23:00	2008	10	15	23:00	2008.10.15	2008.789504	2008.789067	0.21428571	-0.6690068	6.11	-5.661	-24.104			1.5	None	input	near met. site at Carreg Wen	yes	yes	no	no	7	Wednesday	85	5	-5.661	-24.104	6.11
2021	CR2021	CR	2008.10.16 06:00	2008.10.16 03:45	2008.10.15 23:00	2008.10.16 06:00	2008	10	16	06:00	2008.10.16	2008.790301	2008.790044	0.28571429	-0.544068	9.16	-6.493	-26.292			2	None	input	near met. site at Carreg Wen	yes	yes	no	no	7	Wednesday	85	6	-6.493	-26.292	9.16
2022	CR2022	CR	2008.10.16 13:00	2008.10.16 09:30	2008.10.16 06:00	2008.10.16 13:00	2008	10	16	13:00	2008.10.16	2008.791097	2008.790699	0							0	None	input	near met. site at Carreg Wen	no	no		no	7	Thursday	85	7
2023	CR2023	CR	2008.10.16 20:00	2008.10.16 16:15	2008.10.16 13:00	2008.10.16 20:00	2008	10	16	20:00	2008.10.16	2008.791894	2008.791467	0.28571429	-0.544068	7.52	-5.504	-21.194			2	None	input	near met. site at Carreg Wen	yes	yes	no	no	14	Thursday	85	8	-5.504	-21.194	7.52
2024	CR2024	CR	2008.10.17 03:00	2008.10.16 23:30	2008.10.16 20:00	2008.10.17 03:00	2008	10	17	03:00	2008.10.17	2008.792691	2008.792293	0							0	None	input	near met. site at Carreg Wen	no	no		no	7	Thursday	85	9
2025	CR2025	CR	2008.10.17 10:00	2008.10.17 05:30	2008.10.17 03:00	2008.10.17 10:00	2008	10	17	10:00	2008.10.17	2008.793488	2008.792976	0.07142857	-1.146128						0.5	None	input	near met. site at Carreg Wen	no	no		no	14	Friday	85	10
2026	CR2026	CR	2008.10.17 17:00	2008.10.17 13:30	2008.10.17 10:00	2008.10.17 17:00	2008	10	17	17:00	2008.10.17	2008.794285	2008.793887	0							0	None	input	near met. site at Carreg Wen	no	no		no	21	Friday	85	11
2027	CR2027	CR	2008.10.18 00:00	2008.10.17 23:30	2008.10.17 17:00	2008.10.18 00:00	2008	10	18	00:00	2008.10.18	2008.795082	2008.795025	0.07142857	-1.146128	6.4					0.5	None	input	near met. site at Carreg Wen	yes	no		no	28	Friday	85	12			6.4
2028	CR2028	CR	2008.10.18 07:00	2008.10.18 02:56	2008.10.18 00:00	2008.10.18 07:00	2008	10	18	07:00	2008.10.18	2008.795879	2008.795417	0.64285714	-0.1918855	2.49	-4.76	-14.507			4.5	None	input	near met. site at Carreg Wen	yes	yes	no	no	7	Saturday	85	13	-4.76	-14.507	2.49
2029	CR2029	CR	2008.10.18 14:00	2008.10.18 13:15	2008.10.18 07:00	2008.10.18 14:00	2008	10	18	14:00	2008.10.18	2008.796676	2008.79659	0.28571429	-0.544068	5.63	-3.304	-7.664			2	None	input	near met. site at Carreg Wen	yes	yes	no	no	7	Saturday	85	14	-3.304	-7.664	5.63
2030	CR2030	CR	2008.10.18 21:00	2008.10.18 17:34	2008.10.18 14:00	2008.10.18 21:00	2008	10	18	21:00	2008.10.18	2008.797473	2008.797082	1.07142857	0.02996322	3.54	-3.65	-8.904			7.5	None	input	near met. site at Carreg Wen	yes	yes	no	no	7	Saturday	85	15	-3.65	-8.904	3.54
2031	CR2031	CR	2008.10.19 04:00	2008.10.18 22:54	2008.10.18 21:00	2008.10.19 04:00	2008	10	19	04:00	2008.10.19	2008.79827	2008.797689	0.71428571	-0.146128	3.96	-3.765	-11.547			5	None	input	near met. site at Carreg Wen	yes	yes	no	no	7	Saturday	85	16	-3.765	-11.547	3.96
2032	CR2032	CR	2008.10.19 11:00	2008.10.19 07:00	2008.10.19 04:00	2008.10.19 11:00	2008	10	19	11:00	2008.10.19	2008.799067	2008.798611	0.14285714	-0.845098	8.26					1	None	input	near met. site at Carreg Wen	yes	no		no	7	Sunday	85	17			8.26
2033	CR2033	CR	2008.10.19 18:00	2008.10.19 17:18	2008.10.19 11:00	2008.10.19 18:00	2008	10	19	18:00	2008.10.19	2008.799863	2008.799784	0.35714286	-0.447158	13.3	-3.522	-6.14			2.5	None	input	near met. site at Carreg Wen	yes	yes	no	no	7	Sunday	85	18	-3.522	-6.14	13.3
2034	CR2034	CR	2008.10.20 01:00	2008.10.19 21:53	2008.10.19 18:00	2008.10.20 01:00	2008	10	20	01:00	2008.10.20	2008.80066	2008.800306	4.42857143	0.64626365	0.19	-4.874	-24.635			31	None	input	near met. site at Carreg Wen	yes	yes	no	no	7	Sunday	85	19	-4.874	-24.635	0.19
2035	CR2035	CR	2008.10.20 08:00	2008.10.20 04:04	2008.10.20 01:00	2008.10.20 08:00	2008	10	20	08:00	2008.10.20	2008.801457	2008.80101	2	0.30103	2.86	-2.688	-9.162			14	None	input	near met. site at Carreg Wen	yes	yes	no	no	7	Monday	85	20	-2.688	-9.162	2.86
2036	CR2036	CR	2008.10.20 15:00	2008.10.20 13:24	2008.10.20 08:00	2008.10.20 15:00	2008	10	20	15:00	2008.10.20	2008.802254	2008.802073	0.78571429	-0.1047354	3.24	-14.563	-102.328			5.5	None	input	near met. site at Carreg Wen	yes	yes	no	no	7	Monday	85	21	-14.563	-102.328	3.24
2037	CR2037	CR	2008.10.20 22:00	2008.10.20 18:36	2008.10.20 15:00	2008.10.20 22:00	2008	10	20	22:00	2008.10.20	2008.803051	2008.802665	0.64285714	-0.1918855	8.83	-9.409	-49.793			4.5	None	input	near met. site at Carreg Wen	yes	yes	no	no	7	Monday	85	22	-9.409	-49.793	8.83
2038	CR2038	CR	2008.10.21 05:00	2008.10.21 00:52	2008.10.20 22:00	2008.10.21 05:00	2008	10	21	05:00	2008.10.21	2008.803848	2008.803378	0.57142857	-0.243038	6.46	-11.573	-62.737			4	None	input	near met. site at Carreg Wen	yes	yes	no	no	7	Monday	85	23	-11.573	-62.737	6.46
2039	CR2039	CR	2008.10.21 12:00	2008.10.21 08:30	2008.10.21 05:00	2008.10.21 12:00	2008	10	21	12:00	2008.10.21	2008.804645	2008.804246	0.07142857	-1.146128	16.9					0.5	No rain at changeover	input	near met. site at Carreg Wen	yes	no		no	7	Tuesday	85	24			16.9
2040	CR2040	CR	2008.10.21 19:00	2008.10.21 17:30	2008.10.21 12:00	2008.10.21 19:00	2008	10	21	19:00	2008.10.21	2008.805442	2008.805271	0.07142857	-1.146128	15.2					0.5	None	input	near met. site at Carreg Wen	yes	no		no	7	Tuesday	86	1			15.2
2041	CR2041	CR	2008.10.22 02:00	2008.10.21 21:00	2008.10.21 19:00	2008.10.22 02:00	2008	10	22	02:00	2008.10.22	2008.806239	2008.805669	0.57142857	-0.243038	4.61	-8.25	-37.297			4	None	input	near met. site at Carreg Wen	yes	yes	no	no	7	Tuesday	86	2	-8.25	-37.297	4.61
2042	CR2042	CR	2008.10.22 09:00	2008.10.22 05:06	2008.10.22 02:00	2008.10.22 09:00	2008	10	22	09:00	2008.10.22	2008.807036	2008.806592	0.35714286	-0.447158	7.23	-7.825	-37.527			2.5	None	input	near met. site at Carreg Wen	yes	yes	no	no	7	Wednesday	86	3	-7.825	-37.527	7.23
2043	CR2043	CR	2008.10.22 16:00	2008.10.22 12:30	2008.10.22 09:00	2008.10.22 16:00	2008	10	22	16:00	2008.10.22	2008.807832	2008.807434	0			-4.787	-24.829			0	None	input	near met. site at Carreg Wen	no	no	no	no	7	Wednesday	86	4	-4.787	-24.829
2044	CR2044	CR	2008.10.22 23:00	2008.10.22 19:30	2008.10.22 16:00	2008.10.22 23:00	2008	10	22	23:00	2008.10.22	2008.808629	2008.808231	0							0	None	input	near met. site at Carreg Wen	no	no		no	14	Wednesday	86	5
2045	CR2045	CR	2008.10.23 06:00	2008.10.23 02:30	2008.10.22 23:00	2008.10.23 06:00	2008	10	23	06:00	2008.10.23	2008.809426	2008.809028	0							0	None	input	near met. site at Carreg Wen	no	no		no	21	Wednesday	86	6
2046	CR2046	CR	2008.10.23 13:00	2008.10.23 11:40	2008.10.23 06:00	2008.10.23 13:00	2008	10	23	13:00	2008.10.23	2008.810223	2008.810071	0.85714286	-0.0669468	25	-2.839	-2.922			6	None	input	near met. site at Carreg Wen	yes	yes	no	no	28	Thursday	86	7	-2.839	-2.922	25
2047	CR2047	CR	2008.10.23 20:00	2008.10.23 16:07	2008.10.23 13:00	2008.10.23 20:00	2008	10	23	20:00	2008.10.23	2008.81102	2008.81058	5.21428571	0.71719482	0.42	-3.923	-15.464			36.5	None	input	near met. site at Carreg Wen	yes	yes	no	no	7	Thursday	86	8	-3.923	-15.464	0.42
2048	CR2048	CR	2008.10.24 03:00	2008.10.23 21:38	2008.10.23 20:00	2008.10.24 03:00	2008	10	24	03:00	2008.10.24	2008.811817	2008.811206	1.07142857	0.02996322	6.06	-5.052	-24.132			7.5	None	input	near met. site at Carreg Wen	yes	yes	no	no	7	Thursday	86	9	-5.052	-24.132	6.06
2049	CR2049	CR	2008.10.24 10:00	2008.10.24 06:30	2008.10.24 03:00	2008.10.24 10:00	2008	10	24	10:00	2008.10.24	2008.812614	2008.812215	0							0	None	input	near met. site at Carreg Wen	no	no		no	7	Friday	86	10
2050	CR2050	CR	2008.10.24 17:00	2008.10.24 13:30	2008.10.24 10:00	2008.10.24 17:00	2008	10	24	17:00	2008.10.24	2008.813411	2008.813012	0							0	None	input	near met. site at Carreg Wen	no	no		no	14	Friday	86	11
2051	CR2051	CR	2008.10.25 00:00	2008.10.24 20:30	2008.10.24 17:00	2008.10.25 00:00	2008	10	25	00:00	2008.10.25	2008.814208	2008.813809	0							0	None	input	near met. site at Carreg Wen	no	no		no	21	Friday	86	12
2052	CR2052	CR	2008.10.25 07:00	2008.10.25 03:30	2008.10.25 00:00	2008.10.25 07:00	2008	10	25	07:00	2008.10.25	2008.815005	2008.814606	0							0	None	input	near met. site at Carreg Wen	no	no		no	28	Saturday	86	13
2053	CR2053	CR	2008.10.25 14:00	2008.10.25 12:00	2008.10.25 07:00	2008.10.25 14:00	2008	10	25	14:00	2008.10.25	2008.815802	2008.815574	0.42857143	-0.3679768	19.8	-3.188	-4.588			3	None	input	near met. site at Carreg Wen	yes	yes	no	no	35	Saturday	86	14	-3.188	-4.588	19.8
2054	CR2054	CR	2008.10.25 21:00	2008.10.25 17:51	2008.10.25 14:00	2008.10.25 21:00	2008	10	25	21:00	2008.10.25	2008.816598	2008.81624	4.85714286	0.68638088	0.17	-3.374	-16.295			34	None	input	near met. site at Carreg Wen	yes	yes	no	no	7	Saturday	86	15	-3.374	-16.295	0.17
2055	CR2055	CR	2008.10.26 04:00	2008.10.25 23:59	2008.10.25 21:00	2008.10.26 04:00	2008	10	26	04:00	2008.10.26	2008.817395	2008.816939	7.35714286	0.86670919	0.36	-11.721	-75.135			51.5	None	input	near met. site at Carreg Wen	yes	yes	no	no	7	Saturday	86	16	-11.721	-75.135	0.36
2056	CR2056	CR	2008.10.26 11:00	2008.10.26 05:42	2008.10.26 04:00	2008.10.26 11:00	2008	10	26	11:00	2008.10.26	2008.818192	2008.817589	1.78571429	0.25181197	0.61	-10.524	-72.264			12.5	None	input	near met. site at Carreg Wen	yes	yes	no	no	7	Sunday	86	17	-10.524	-72.264	0.61
2057	CR2057	CR	2008.10.26 18:00	2008.10.26 17:30	2008.10.26 11:00	2008.10.26 18:00	2008	10	26	18:00	2008.10.26	2008.818989	2008.818932	0.28571429	-0.544068	13.2	-5.544	-15.689			2	None	input	near met. site at Carreg Wen	yes	yes	no	no	7	Sunday	86	18	-5.544	-15.689	13.2
2058	CR2058	CR	2008.10.27 01:00	2008.10.26 20:30	2008.10.26 18:00	2008.10.27 01:00	2008	10	27	01:00	2008.10.27	2008.819786	2008.819274	0.14285714	-0.845098	14.6					1	None	input	near met. site at Carreg Wen	yes	yes		no	7	Sunday	86	19			14.6
2059	CR2059	CR	2008.10.27 08:00	2008.10.27 05:52	2008.10.27 01:00	2008.10.27 08:00	2008	10	27	08:00	2008.10.27	2008.820583	2008.820341	0.57142857	-0.243038	12.2	-8.213	-34.345			4	None	input	near met. site at Carreg Wen	yes	yes	no	no	7	Monday	86	20	-8.213	-34.345	12.2
2060	CR2060	CR	2008.10.27 15:00	2008.10.27 11:00	2008.10.27 08:00	2008.10.27 15:00	2008	10	27	15:00	2008.10.27	2008.82138	2008.820924	0.14285714	-0.845098	6.31	-7.293	-35.342			1	None	input	near met. site at Carreg Wen	yes	yes	no	no	7	Monday	86	21	-7.293	-35.342	6.31
2061	CR2061	CR	2008.10.27 22:00	2008.10.27 18:30	2008.10.27 15:00	2008.10.27 22:00	2008	10	27	22:00	2008.10.27	2008.822177	2008.821778	0.07142857	-1.146128						0.5	None	input	near met. site at Carreg Wen	no	no		no	7	Monday	86	22
2062	CR2062	CR	2008.10.28 05:00	2008.10.28 01:30	2008.10.27 22:00	2008.10.28 05:00	2008	10	28	05:00	2008.10.28	2008.822974	2008.822575	0							0	None	input	near met. site at Carreg Wen	yes	no		no	14	Monday	86	23
2063	CR2063	CR	2008.10.28 12:00	2008.10.28 09:15	2008.10.28 05:00	2008.10.28 12:00	2008	10	28	12:00	2008.10.28	2008.823771	2008.823457	0.57142857	-0.243038	6.85	-8.586	-41.034			4	Snow falling and snow in collector	input	near met. site at Carreg Wen	yes	yes	no	no	7	Tuesday	86	24	-8.586	-41.034	6.85
2064	CR2064	CR	2008.10.28 19:00	2008.10.28 12:42	2008.10.28 12:00	2008.10.28 19:00	2008	10	28	19:00	2008.10.28	2008.824567	2008.82385	1.07142857	0.02996322	2.64	-10.092	-53.806			7.5	None	input	near met. site at Carreg Wen	yes	yes	no	no	7	Tuesday	87	1	-10.092	-53.806	2.64
2065	CR2065	CR	2008.10.29 02:00	2008.10.28 22:30	2008.10.28 19:00	2008.10.29 02:00	2008	10	29	02:00	2008.10.29	2008.825364	2008.824966	0							0	None	input	near met. site at Carreg Wen	no	no		no	7	Tuesday	87	2
2066	CR2066	CR	2008.10.29 09:00	2008.10.29 08:30	2008.10.29 02:00	2008.10.29 09:00	2008	10	29	09:00	2008.10.29	2008.826161	2008.826104	0.07142857	-1.146128						0.5	None	input	near met. site at Carreg Wen	no	no		no	14	Wednesday	87	3
2067	CR2067	CR	2008.10.29 16:00	2008.10.29 11:30	2008.10.29 09:00	2008.10.29 16:00	2008	10	29	16:00	2008.10.29	2008.826958	2008.826446	0.07142857	-1.146128	3.55					0.5	None	input	near met. site at Carreg Wen	yes	no		no	21	Wednesday	87	4			3.55
2068	CR2068	CR	2008.10.29 23:00	2008.10.29 19:30	2008.10.29 16:00	2008.10.29 23:00	2008	10	29	23:00	2008.10.29	2008.827755	2008.827357	0		2.83					0	None	input	near met. site at Carreg Wen	yes	no		no	7	Wednesday	87	5			2.83
2069	CR2069	CR	2008.10.30 06:00	2008.10.30 02:30	2008.10.29 23:00	2008.10.30 06:00	2008	10	30	06:00	2008.10.30	2008.828552	2008.828154	0							0	None	input	near met. site at Carreg Wen	yes	no		no	7	Wednesday	87	6
2070	CR2070	CR	2008.10.30 13:00	2008.10.30 09:30	2008.10.30 06:00	2008.10.30 13:00	2008	10	30	13:00	2008.10.30	2008.829349	2008.82895	0							0	None	input	near met. site at Carreg Wen	yes	no		no	7	Thursday	87	7
2071	CR2071	CR	2008.10.30 20:00	2008.10.30 16:30	2008.10.30 13:00	2008.10.30 20:00	2008	10	30	20:00	2008.10.30	2008.830146	2008.829747	0		2.99					0	None	input	near met. site at Carreg Wen	yes	no		no	7	Thursday	87	8			2.99
2072	CR2072	CR	2008.10.31 03:00	2008.10.30 23:30	2008.10.30 20:00	2008.10.31 03:00	2008	10	31	03:00	2008.10.31	2008.830943	2008.830544	0		2.82					0	None	input	near met. site at Carreg Wen	yes	no		no	7	Thursday	87	9			2.82
2073	CR2073	CR	2008.10.31 10:00	2008.10.31 06:30	2008.10.31 03:00	2008.10.31 10:00	2008	10	31	10:00	2008.10.31	2008.83174	2008.831341	0							0	None	input	near met. site at Carreg Wen	yes	no		no	7	Friday	87	10
2074	CR2074	CR	2008.10.31 17:00	2008.10.31 13:55	2008.10.31 10:00	2008.10.31 17:00	2008	10	31	17:00	2008.10.31	2008.832536	2008.832187	0.5	-0.30103	1.12	-10.709	-61.41			3.5	None	input	near met. site at Carreg Wen	yes	yes	no	no	7	Friday	87	11	-10.709	-61.41	1.12
2075	CR2075	CR	2008.11.01 00:00	2008.10.31 20:30	2008.10.31 17:00	2008.11.01 00:00	2008	11	1	00:00	2008.11.01	2008.833333	2008.832935	0							0	None	input	near met. site at Carreg Wen	yes	no		no	7	Friday	87	12
2076	CR2076	CR	2008.11.01 07:00	2008.11.01 03:30	2008.11.01 00:00	2008.11.01 07:00	2008	11	1	07:00	2008.11.01	2008.83413	2008.833732	0							0	None	input	near met. site at Carreg Wen	no	no		no	7	Saturday	87	13
2077	CR2077	CR	2008.11.01 14:00	2008.11.01 08:30	2008.11.01 07:00	2008.11.01 14:00	2008	11	1	14:00	2008.11.01	2008.834927	2008.834301	0.07142857	-1.146128	1.25	-9.549	-53.019			0.5	None	input	near met. site at Carreg Wen	yes	yes	no	no	14	Saturday	87	14	-9.549	-53.019	1.25
2078	CR2078	CR	2008.11.01 21:00	2008.11.01 17:30	2008.11.01 14:00	2008.11.01 21:00	2008	11	1	21:00	2008.11.01	2008.835724	2008.835326	0							0	None	input	near met. site at Carreg Wen	no	no		no	7	Saturday	87	15
2079	CR2079	CR	2008.11.02 04:00	2008.11.02 00:30	2008.11.01 21:00	2008.11.02 04:00	2008	11	2	04:00	2008.11.02	2008.836521	2008.836123	0							0	None	input	near met. site at Carreg Wen	no	no		no	14	Saturday	87	16
2080	CR2080	CR	2008.11.02 11:00	2008.11.02 07:30	2008.11.02 04:00	2008.11.02 11:00	2008	11	2	11:00	2008.11.02	2008.837318	2008.836919	0							0	None	input	near met. site at Carreg Wen	no	no		no	21	Sunday	87	17
2081	CR2081	CR	2008.11.02 18:00	2008.11.02 14:30	2008.11.02 11:00	2008.11.02 18:00	2008	11	2	18:00	2008.11.02	2008.838115	2008.837716	0							0	None	input	near met. site at Carreg Wen	no	no		no	28	Sunday	87	18
2082	CR2082	CR	2008.11.03 01:00	2008.11.02 18:30	2008.11.02 18:00	2008.11.03 01:00	2008	11	3	01:00	2008.11.03	2008.838912	2008.838172	0.07142857	-1.146128						0.5	None	input	near met. site at Carreg Wen	yes	no		no	35	Sunday	87	19
2083	CR2083	CR	2008.11.03 08:00	2008.11.03 04:30	2008.11.03 01:00	2008.11.03 08:00	2008	11	3	08:00	2008.11.03	2008.839709	2008.83931	0							0	None	input	near met. site at Carreg Wen	no	no		no	7	Monday	87	20
2084	CR2084	CR	2008.11.03 15:00	2008.11.03 11:30	2008.11.03 08:00	2008.11.03 15:00	2008	11	3	15:00	2008.11.03	2008.840506	2008.840107	0							0	None	input	near met. site at Carreg Wen	no	no		no	14	Monday	87	21
2085	CR2085	CR	2008.11.03 22:00	2008.11.03 18:30	2008.11.03 15:00	2008.11.03 22:00	2008	11	3	22:00	2008.11.03	2008.841302	2008.840904	0							0	None	input	near met. site at Carreg Wen	no	no		no	21	Monday	87	22
2086	CR2086	CR	2008.11.04 05:00	2008.11.04 01:30	2008.11.03 22:00	2008.11.04 05:00	2008	11	4	05:00	2008.11.04	2008.842099	2008.841701	0							0	None	input	near met. site at Carreg Wen	no	no		no	28	Monday	87	23
2087	CR2087	CR	2008.11.04 12:00	2008.11.04 09:00	2008.11.04 05:00	2008.11.04 12:00	2008	11	4	12:00	2008.11.04	2008.842896	2008.842555	0.14285714	-0.845098	3.59	-6.435	-33.743			1	Not raining at changeover	input	near met. site at Carreg Wen	yes	yes	no	no	35	Tuesday	87	24	-6.435	-33.743	3.59
2088	CR2088	CR	2008.11.04 19:00	2008.11.04 15:30	2008.11.04 12:00	2008.11.04 19:00	2008	11	4	19:00	2008.11.04	2008.843693	2008.843295	0							0	None	input	near met. site at Carreg Wen	no	no		no	7	Tuesday	88	1
2089	CR2089	CR	2008.11.05 02:00	2008.11.04 22:30	2008.11.04 19:00	2008.11.05 02:00	2008	11	5	02:00	2008.11.05	2008.84449	2008.844092	0							0	None	input	near met. site at Carreg Wen	no	no		no	14	Tuesday	88	2
2090	CR2090	CR	2008.11.05 09:00	2008.11.05 05:30	2008.11.05 02:00	2008.11.05 09:00	2008	11	5	09:00	2008.11.05	2008.845287	2008.844888	0							0	None	input	near met. site at Carreg Wen	no	no		no	21	Wednesday	88	3
2091	CR2091	CR	2008.11.05 16:00	2008.11.05 12:30	2008.11.05 09:00	2008.11.05 16:00	2008	11	5	16:00	2008.11.05	2008.846084	2008.845685	0							0	None	input	near met. site at Carreg Wen	no	no		no	28	Wednesday	88	4
2092	CR2092	CR	2008.11.05 23:00	2008.11.05 19:30	2008.11.05 16:00	2008.11.05 23:00	2008	11	5	23:00	2008.11.05	2008.846881	2008.846482	0							0	None	input	near met. site at Carreg Wen	no	no		no	35	Wednesday	88	5
2093	CR2093	CR	2008.11.06 06:00	2008.11.06 02:30	2008.11.05 23:00	2008.11.06 06:00	2008	11	6	06:00	2008.11.06	2008.847678	2008.847279	0							0	None	input	near met. site at Carreg Wen	no	no		no	42	Wednesday	88	6
2094	CR2094	CR	2008.11.06 13:00	2008.11.06 09:30	2008.11.06 06:00	2008.11.06 13:00	2008	11	6	13:00	2008.11.06	2008.848475	2008.848076	0							0	None	input	near met. site at Carreg Wen	no	no		no	49	Thursday	88	7
2095	CR2095	CR	2008.11.06 20:00	2008.11.06 14:30	2008.11.06 13:00	2008.11.06 20:00	2008	11	6	20:00	2008.11.06	2008.849271	2008.848645	0.07142857	-1.146128						0.5	None	input	near met. site at Carreg Wen	no	no		no	56	Thursday	88	8
2096	CR2096	CR	2008.11.07 03:00	2008.11.07 01:47	2008.11.06 20:00	2008.11.07 03:00	2008	11	7	03:00	2008.11.07	2008.850068	2008.84993	0.5	-0.30103	1.58	-8.777	-49.207			3.5	None	input	near met. site at Carreg Wen	yes	yes	no	no	63	Thursday	88	9	-8.777	-49.207	1.58
2097	CR2097	CR	2008.11.07 10:00	2008.11.07 06:30	2008.11.07 03:00	2008.11.07 10:00	2008	11	7	10:00	2008.11.07	2008.850865	2008.850467	0							0	None	input	near met. site at Carreg Wen	no	no		no	7	Friday	88	10
2098	CR2098	CR	2008.11.07 17:00	2008.11.07 16:30	2008.11.07 10:00	2008.11.07 17:00	2008	11	7	17:00	2008.11.07	2008.851662	2008.851605	0.07142857	-1.146128						0.5	None	input	near met. site at Carreg Wen	yes	no		no	14	Friday	88	11
2099	CR2099	CR	2008.11.08 00:00	2008.11.07 20:00	2008.11.07 17:00	2008.11.08 00:00	2008	11	8	00:00	2008.11.08	2008.852459	2008.852004	0.14285714	-0.845098	18.5	-5.074	-14.153			1	None	input	near met. site at Carreg Wen	yes	yes	no	no	7	Friday	88	12	-5.074	-14.153	18.5
2100	CR2100	CR	2008.11.08 07:00	2008.11.08 03:10	2008.11.08 00:00	2008.11.08 07:00	2008	11	8	07:00	2008.11.08	2008.853256	2008.85282	1.28571429	0.10914447	0.64	-11.969	-71.984			9	None	input	near met. site at Carreg Wen	yes	yes	no	no	7	Saturday	88	13	-11.969	-71.984	0.64
2101	CR2101	CR	2008.11.08 14:00	2008.11.08 07:30	2008.11.08 07:00	2008.11.08 14:00	2008	11	8	14:00	2008.11.08	2008.854053	2008.853313	0.21428571	-0.6690068	6.57	-8.25	-49.425			1.5	None	input	near met. site at Carreg Wen	yes	yes	no	no	7	Saturday	88	14	-8.25	-49.425	6.57
2102	CR2102	CR	2008.11.08 21:00	2008.11.08 17:47	2008.11.08 14:00	2008.11.08 21:00	2008	11	8	21:00	2008.11.08	2008.85485	2008.854484	2	0.30103	12.6	-12.517	-78.742			14	None	input	near met. site at Carreg Wen	yes	yes	no	no	7	Saturday	88	15	-12.517	-78.742	12.6
2103	CR2103	CR	2008.11.09 04:00	2008.11.09 00:30	2008.11.08 21:00	2008.11.09 04:00	2008	11	9	04:00	2008.11.09	2008.855647	2008.855248	0.35714286	-0.447158	27	-8.774	-40.647			2.5	None	input	near met. site at Carreg Wen	yes	yes	no	no	7	Saturday	88	16	-8.774	-40.647	27
2104	CR2104	CR	2008.11.09 11:00	2008.11.09 08:17	2008.11.09 04:00	2008.11.09 11:00	2008	11	9	11:00	2008.11.09	2008.856444	2008.856135	1.35714286	0.13262557	20.1	-7.945	-32.373			9.5	None	input	near met. site at Carreg Wen	yes	yes	no	no	7	Sunday	88	17	-7.945	-32.373	20.1
2105	CR2105	CR	2008.11.09 18:00	2008.11.09 15:22	2008.11.09 11:00	2008.11.09 18:00	2008	11	9	18:00	2008.11.09	2008.85724	2008.856942	2.85714286	0.45593196	6.6	-7.785	-40.706			20	None	input	near met. site at Carreg Wen	yes	yes	no	no	7	Sunday	88	18	-7.785	-40.706	6.6
2106	CR2106	CR	2008.11.10 01:00	2008.11.09 20:30	2008.11.09 18:00	2008.11.10 01:00	2008	11	10	01:00	2008.11.10	2008.858037	2008.857525	0.35714286	-0.447158	22.1	-8.135	-38.646			2.5	None	input	near met. site at Carreg Wen	yes	yes	no	no	7	Sunday	88	19	-8.135	-38.646	22.1
2107	CR2107	CR	2008.11.10 08:00	2008.11.10 07:30	2008.11.10 01:00	2008.11.10 08:00	2008	11	10	08:00	2008.11.10	2008.858834	2008.858777	0.07142857	-1.146128	52.1					0.5	None	input	near met. site at Carreg Wen	yes	no		yes	7	Monday	88	20			52.1
2108	CR2108	CR	2008.11.10 15:00	2008.11.10 09:00	2008.11.10 08:00	2008.11.10 15:00	2008	11	10	15:00	2008.11.10	2008.859631	2008.858948	0.42857143	-0.3679768	4.27	-15.236	-97.881			3	None	input	near met. site at Carreg Wen	yes	yes	no	no	7	Monday	88	21	-15.236	-97.881	4.27
2109	CR2109	CR	2008.11.10 22:00	2008.11.10 19:30	2008.11.10 15:00	2008.11.10 22:00	2008	11	10	22:00	2008.11.10	2008.860428	2008.860143	0.14285714	-0.845098	47					1	None	input	near met. site at Carreg Wen	yes	no		yes	7	Monday	88	22			47
2110	CR2110	CR	2008.11.11 05:00	2008.11.11 01:20	2008.11.10 22:00	2008.11.11 05:00	2008	11	11	05:00	2008.11.11	2008.861225	2008.860809	1.35714286	0.13262557	11.8	-10.317	-59.475			9.5	None	input	near met. site at Carreg Wen	yes	yes	no	no	7	Monday	88	23	-10.317	-59.475	11.8
2111	CR2111	CR	2008.11.11 12:00	2008.11.11 08:08	2008.11.11 05:00	2008.11.11 12:00	2008	11	11	12:00	2008.11.11	2008.862022	2008.861582	0.78571429	-0.1047354	24.8	-7.29	-34.128			5.5	Light drizzle at change over	input	near met. site at Carreg Wen	yes	yes	no	no	7	Tuesday	88	24	-7.29	-34.128	24.8
2112	CR2112	CR	2008.11.11 19:00	2008.11.11 17:50	2008.11.11 12:00	2008.11.11 19:00	2008	11	11	19:00	2008.11.11	2008.862819	2008.862686	0.21428571	-0.6690068	18.5	-7.207	-32.839			1.5	None	input	near met. site at Carreg Wen	yes	yes	no	no	7	Tuesday	89	1	-7.207	-32.839	18.5
2113	CR2113	CR	2008.11.12 02:00	2008.11.11 22:30	2008.11.11 19:00	2008.11.12 02:00	2008	11	12	02:00	2008.11.12	2008.863616	2008.863217	0							0	None	input	near met. site at Carreg Wen	no	no		no	7	Tuesday	89	2
2114	CR2114	CR	2008.11.12 09:00	2008.11.12 05:30	2008.11.12 02:00	2008.11.12 09:00	2008	11	12	09:00	2008.11.12	2008.864413	2008.864014	0							0	None	input	near met. site at Carreg Wen	no	no		no	14	Wednesday	89	3
2115	CR2115	CR	2008.11.12 16:00	2008.11.12 11:10	2008.11.12 09:00	2008.11.12 16:00	2008	11	12	16:00	2008.11.12	2008.86521	2008.864659	0.21428571	-0.6690068	15.4	-5.135	-22.941			1.5	None	input	near met. site at Carreg Wen	yes	yes	no	no	21	Wednesday	89	4	-5.135	-22.941	15.4
2116	CR2116	CR	2008.11.12 23:00	2008.11.12 19:30	2008.11.12 16:00	2008.11.12 23:00	2008	11	12	23:00	2008.11.12	2008.866006	2008.865608	0							0	None	input	near met. site at Carreg Wen	no	no		no	7	Wednesday	89	5
2117	CR2117	CR	2008.11.13 06:00	2008.11.13 04:50	2008.11.12 23:00	2008.11.13 06:00	2008	11	13	06:00	2008.11.13	2008.866803	2008.866671	0.42857143	-0.3679768	5.91	-5.585	-25.377			3	None	input	near met. site at Carreg Wen	yes	yes	no	no	14	Wednesday	89	6	-5.585	-25.377	5.91
2118	CR2118	CR	2008.11.13 13:00	2008.11.13 09:50	2008.11.13 06:00	2008.11.13 13:00	2008	11	13	13:00	2008.11.13	2008.8676	2008.86724	1.28571429	0.10914447	0.81	-5.931	-30.893			9	None	input	near met. site at Carreg Wen	yes	yes	no	no	7	Thursday	89	7	-5.931	-30.893	0.81
2119	CR2119	CR	2008.11.13 20:00	2008.11.13 15:00	2008.11.13 13:00	2008.11.13 20:00	2008	11	13	20:00	2008.11.13	2008.868397	2008.867828	0.42857143	-0.3679768	4.68	-3.352	-13.25			3	None	input	near met. site at Carreg Wen	yes	yes	no	no	7	Thursday	89	8	-3.352	-13.25	4.68
2120	CR2120	CR	2008.11.14 03:00	2008.11.14 00:00	2008.11.13 20:00	2008.11.14 03:00	2008	11	14	03:00	2008.11.14	2008.869194	2008.868853	0.14285714	-0.845098	7.6					1	None	input	near met. site at Carreg Wen	yes	no		no	7	Thursday	89	9			7.6
2121	CR2121	CR	2008.11.14 10:00	2008.11.14 06:22	2008.11.14 03:00	2008.11.14 10:00	2008	11	14	10:00	2008.11.14	2008.869991	2008.869578	0.57142857	-0.243038	1.99	-3.027	-13.085			4	None	input	near met. site at Carreg Wen	yes	yes	no	no	7	Friday	89	10	-3.027	-13.085	1.99
2122	CR2122	CR	2008.11.14 17:00	2008.11.14 14:00	2008.11.14 10:00	2008.11.14 17:00	2008	11	14	17:00	2008.11.14	2008.870788	2008.870446	0.14285714	-0.845098	8.59	-2.585	-7.28			1	None	input	near met. site at Carreg Wen	yes	yes	no	no	7	Friday	89	11	-2.585	-7.28	8.59
2123	CR2123	CR	2008.11.15 00:00	2008.11.14 20:47	2008.11.14 17:00	2008.11.15 00:00	2008	11	15	00:00	2008.11.15	2008.871585	2008.871219	1	0	0.58	-3.847	-14.993			7	None	input	near met. site at Carreg Wen	yes	yes	no	no	7	Friday	89	12	-3.847	-14.993	0.58
2124	CR2124	CR	2008.11.15 07:00	2008.11.15 05:02	2008.11.15 00:00	2008.11.15 07:00	2008	11	15	07:00	2008.11.15	2008.872382	2008.872159	1.57142857	0.19629465	0.71	-3.209	-11.482			11	None	input	near met. site at Carreg Wen	yes	yes	no	no	7	Saturday	89	13	-3.209	-11.482	0.71
2125	CR2125	CR	2008.11.15 14:00	2008.11.15 10:09	2008.11.15 07:00	2008.11.15 14:00	2008	11	15	14:00	2008.11.15	2008.873179	2008.87274	3.07142857	0.48734042	0.51	-2.168	-8.309			21.5	None	input	near met. site at Carreg Wen	yes	yes	no	no	7	Saturday	89	14	-2.168	-8.309	0.51
2126	CR2126	CR	2008.11.15 21:00	2008.11.15 16:58	2008.11.15 14:00	2008.11.15 21:00	2008	11	15	21:00	2008.11.15	2008.873975	2008.873517	1.35714286	0.13262557	0.47	-6.629	-38.936			9.5	None	input	near met. site at Carreg Wen	yes	yes	no	no	7	Saturday	89	15	-6.629	-38.936	0.47
2127	CR2127	CR	2008.11.16 04:00	2008.11.16 01:00	2008.11.15 21:00	2008.11.16 04:00	2008	11	16	04:00	2008.11.16	2008.874772	2008.874431	1.42857143	0.15490196	0.92	-4.251	-20.677			10	None	input	near met. site at Carreg Wen	yes	yes	no	no	7	Saturday	89	16	-4.251	-20.677	0.92
2128	CR2128	CR	2008.11.16 11:00	2008.11.16 06:18	2008.11.16 04:00	2008.11.16 11:00	2008	11	16	11:00	2008.11.16	2008.875569	2008.875034	2.14285714	0.33099322	1.06	-4.125	-20.102			15	None	input	near met. site at Carreg Wen	yes	yes	no	no	7	Sunday	89	17	-4.125	-20.102	1.06
2129	CR2129	CR	2008.11.16 18:00	2008.11.16 12:00	2008.11.16 11:00	2008.11.16 18:00	2008	11	16	18:00	2008.11.16	2008.876366	2008.875683	0.14285714	-0.845098	1.04	-6.311	-33.991			1	None	input	near met. site at Carreg Wen	yes	yes	no	no	7	Sunday	89	18	-6.311	-33.991	1.04
2130	CR2130	CR	2008.11.17 01:00	2008.11.16 21:30	2008.11.16 18:00	2008.11.17 01:00	2008	11	17	01:00	2008.11.17	2008.877163	2008.876765	0							0	None	input	near met. site at Carreg Wen	no	no		no	7	Sunday	89	19
2131	CR2131	CR	2008.11.17 08:00	2008.11.17 06:10	2008.11.17 01:00	2008.11.17 08:00	2008	11	17	08:00	2008.11.17	2008.87796	2008.877751	0.21428571	-0.6690068	3.26	-5.392	-26.454			1.5	None	input	near met. site at Carreg Wen	yes	yes	no	no	14	Monday	89	20	-5.392	-26.454	3.26
[truncated: 2,620 more rows]
