# Supplementary material for: New water fractions and transit time distributions at Plynlimon, Wales, estimated from stable water isotopes in precipitation and streamflow
Source: Copernicus journal article supplement (doi:10.5194/hess-2019-290), 2019-06-12
Supplement: Supplementary file 1 [file hess-2019-290-supplement.zip › Plynlimon_isotopes_and_chloride_weekly_2004_2009.txt]

sample_ID	Site	Site Name	Date_Time yyyy.mm.dd HH:MM	Volume-weighted mean sampling time yyyy.mm.dd HH:MM	Yr	Month	Day	Time HH:MM	Date yyyy.mm.dd	Year	Year_mean_sampling	water flux (mm/hr)	log_flow	Cl mg/l	delta_18O	delta_2H	Stream flow (Cumecs)	Runoff (mm/15min)	Rainfall (mm)	Notes	Type	Description	air fraction in isotope bottle	Cl mg/l RDA	delta_18O RDA	delta_2H RDA
70519	LHF	Lower Hafren	2004.12.21 10:30	2004.12.21 10:30	2004	12	21	10:30	2004.12.21	2004.971141	2004.971141	0.26307124	-0.5799266	7.1			0.2616	0.06576781			stream	Main Hafren stream channel above lower flume	0.125	7.1	-3.498	-30.707
70531	LHF	Lower Hafren	2005.01.04 11:32	2005.01.04 11:32	2005	1	4	11:32	2005.01.04	2005.009536	2005.009536	0.50603	-0.2958237	7.6	-5.825	-35.711	0.5032	0.1265075			stream	Main Hafren stream channel above lower flume	0	7.6	-5.825	-35.711
70543	LHF	Lower Hafren	2005.01.11 11:54	2005.01.11 11:54	2005	1	11	11:54	2005.01.11	2005.028756	2005.028756	0.33708516	-0.4722604	7.3	-5.789	-34.251	0.3352	0.08427129			stream	Main Hafren stream channel above lower flume	0	7.3	-5.789	-34.251
70555	LHF	Lower Hafren	2005.01.18 10:48	2005.01.18 10:48	2005	1	18	10:48	2005.01.18	2005.047808	2005.047808	0.31516256	-0.5014654	8.5			0.3134	0.07879064			stream	Main Hafren stream channel above lower flume	0.125	8.5	-4.407	-29.146
70567	LHF	Lower Hafren	2005.01.25 10:40	2005.01.25 10:40	2005	1	25	10:40	2005.01.25	2005.066971	2005.066971	0.22113672	-0.6553391	8.2	-5.616	-33.593	0.2199	0.05528418			stream	Main Hafren stream channel above lower flume	0	8.2	-5.616	-33.593
70579	LHF	Lower Hafren	2005.02.01 15:20	2005.02.01 15:20	2005	2	1	15:20	2005.02.01	2005.086682	2005.086682	0.12268612	-0.9112046	7.1			0.122	0.03067153			stream	Main Hafren stream channel above lower flume	0.125	7.1	-4.117	-31.097
70590	LHF	Lower Hafren	2005.02.08 13:51	2005.02.08 13:51	2005	2	8	13:51	2005.02.08	2005.105691	2005.105691	0.08577972	-1.0666154	6.7	-6.064	-36.526	0.0853	0.02144493			stream	Main Hafren stream channel above lower flume	0	6.7	-6.064	-36.526
70602	LHF	Lower Hafren	2005.02.15 16:20	2005.02.15 16:20	2005	2	15	16:20	2005.02.15	2005.125152	2005.125152	0.1663302	-0.7790289	7.4	-5.664	-35.049	0.1654	0.04158255			stream	Main Hafren stream channel above lower flume	0	7.4	-5.664	-35.049
70613	LHF	Lower Hafren	2005.02.22 10:40	2005.02.22 10:40	2005	2	22	10:40	2005.02.22	2005.143683	2005.143683	0.0899028	-1.0462268	6.9	-5.908	-35.875	0.0894	0.0224757			stream	Main Hafren stream channel above lower flume	0	6.9	-5.908	-35.875
70624	LHF	Lower Hafren	2005.03.01 10:35	2005.03.01 10:35	2005	3	1	10:35	2005.03.01	2005.162852	2005.162852	0.13596036	-0.8665877	9.2	-6.084	-37.239	0.1352	0.03399009			stream	Main Hafren stream channel above lower flume	0	9.2	-6.084	-37.239
70635	LHF	Lower Hafren	2005.03.08 10:32	2005.03.08 10:32	2005	3	8	10:32	2005.03.08	2005.182024	2005.182024	0.07230436	-1.1408355	7.2			0.0719	0.01807609			stream	Main Hafren stream channel above lower flume	0.5	7.2	5.815	-5.355
70647	LHF	Lower Hafren	2005.03.15 10:30	2005.03.15 10:30	2005	3	15	10:30	2005.03.15	2005.201199	2005.201199	0.15184924	-0.8185874	7.7	-5.575	-32.743	0.151	0.03796231			stream	Main Hafren stream channel above lower flume	0	7.7	-5.575	-32.743
70658	LHF	Lower Hafren	2005.03.22 11:30	2005.03.22 11:30	2005	3	22	11:30	2005.03.22	2005.220491	2005.220491	0.12640692	-0.8982292	7.2	-5.851	-35.147	0.1257	0.03160173			stream	Main Hafren stream channel above lower flume	0	7.2	-5.851	-35.147
70670	LHF	Lower Hafren	2005.03.29 11:13	2005.03.29 11:13	2005	3	29	11:13	2005.03.29	2005.239637	2005.239637	0.07693024	-1.1139029	6.9			0.0765	0.01923256			stream	Main Hafren stream channel above lower flume	0.5	6.9	6.173	-3.964
70682	LHF	Lower Hafren	2005.04.05 13:41	2005.04.05 13:41	2005	4	5	13:41	2005.04.05	2005.259096	2005.259096	0.0899028	-1.0462268	7.1			0.0894	0.0224757			stream	Main Hafren stream channel above lower flume	0.25	7.1	-1.456	-23.827
70694	LHF	Lower Hafren	2005.04.12 09:48	2005.04.12 09:48	2005	4	12	09:48	2005.04.12	2005.277831	2005.277831	0.20565012	-0.686871	6.9			0.2045	0.05141253			stream	Main Hafren stream channel above lower flume	0.66666	6.9	8.899	3.836
70706	LHF	Lower Hafren	2005.04.19 10:17	2005.04.19 10:17	2005	4	19	10:17	2005.04.19	2005.297064	2005.297064	0.31646988	-0.4996676	6.8	-5.993	-36.537	0.3147	0.07911747			stream	Main Hafren stream channel above lower flume	0	6.8	-5.993	-36.537
70717	LHF	Lower Hafren	2005.04.26 09:51	2005.04.26 09:51	2005	4	26	09:51	2005.04.26	2005.316193	2005.316193	0.108004	-0.9665602	6.8			0.1074	0.027001			stream	Main Hafren stream channel above lower flume	0	6.8	-5.443	-35.51
70729	LHF	Lower Hafren	2005.05.03 10:58	2005.05.03 10:58	2005	5	3	10:58	2005.05.03	2005.335499	2005.335499	0.14289916	-0.8449703	6.4	-5.915	-36.778	0.1421	0.03572479		F,Cl,NO3-by ion chromatography.	stream	Main Hafren stream channel above lower flume	0	6.4	-5.915	-36.778
70741	LHF	Lower Hafren	2005.05.10 09:30	2005.05.10 09:30	2005	5	10	09:30	2005.05.10	2005.354509	2005.354509	0.09754552	-1.0107927	6.6			0.097	0.02438638			stream	Main Hafren stream channel above lower flume	0.16666	6.6	-2.93	-29.063
70753	LHF	Lower Hafren	2005.05.17 09:52	2005.05.17 09:52	2005	5	17	09:52	2005.05.17	2005.373729	2005.373729	0.06697456	-1.1740901	6.7	-6.031	-37.053	0.0666	0.01674364			stream	Main Hafren stream channel above lower flume	0	6.7	-6.031	-37.053
70765	LHF	Lower Hafren	2005.05.24 10:27	2005.05.24 10:27	2005	5	24	10:27	2005.05.24	2005.392974	2005.392974	0.26307124	-0.5799266	6.1	-5.801	-35.609	0.2616	0.06576781			stream	Main Hafren stream channel above lower flume	0	6.1	-5.801	-35.609
70777	LHF	Lower Hafren	2005.05.31 11:20	2005.05.31 11:20	2005	5	31	11:20	2005.05.31	2005.412253	2005.412253	0.06325376	-1.1989137	6.4	-6.138	-37.167	0.0629	0.01581344			stream	Main Hafren stream channel above lower flume	0	6.4	-6.138	-37.167
70788	LHF	Lower Hafren	2005.06.07 12:15	2005.06.07 12:15	2005	6	7	12:15	2005.06.07	2005.431535	2005.431535	0.10016016	-0.999305	6.3	-6.062	-37.088	0.0996	0.02504004			stream	Main Hafren stream channel above lower flume	0	6.3	-6.062	-37.088
70800	LHF	Lower Hafren	2005.06.14 09:10	2005.06.14 09:10	2005	6	14	09:10	2005.06.14	2005.450362	2005.450362	0.0625498	-1.2037741	6.7	-6.144	-37.548	0.0622	0.01563745			stream	Main Hafren stream channel above lower flume	0	6.7	-6.144	-37.548
70810	LHF	Lower Hafren	2005.06.21 13:47	2005.06.21 13:47	2005	6	21	13:47	2005.06.21	2005.470067	2005.470067	0.07853924	-1.1049133	6.4	-5.924	-36.268	0.0781	0.01963481			stream	Main Hafren stream channel above lower flume	0	6.4	-5.924	-36.268
70822	LHF	Lower Hafren	2005.06.28 09:00	2005.06.28 09:00	2005	6	28	09:00	2005.06.28	2005.488699	2005.488699	0.0433424	-1.363087	6.7	-5.791	-36.6	0.0431	0.0108356			stream	Main Hafren stream channel above lower flume	0	6.7	-5.791	-36.6
70834	LHF	Lower Hafren	2005.07.05 07:54	2005.07.05 07:54	2005	7	5	07:54	2005.07.05	2005.507751	2005.507751	0.07300832	-1.1366276	6.1	-5.875	-36.153	0.0726	0.01825208			stream	Main Hafren stream channel above lower flume	0	6.1	-5.875	-36.153
70846	LHF	Lower Hafren	2005.07.12 09:18	2005.07.12 09:18	2005	7	12	09:18	2005.07.12	2005.527089	2005.527089	0.06918692	-1.159976	6.4			0.0688	0.01729673			stream	Main Hafren stream channel above lower flume	0	6.4	-5.527	-35.74
70858	LHF	Lower Hafren	2005.07.19 09:28	2005.07.19 09:28	2005	7	19	09:28	2005.07.19	2005.546286	2005.546286	0.04857164	-1.3136172	6.5			0.0483	0.01214291			stream	Main Hafren stream channel above lower flume	0.33333	6.5	1.336	-17.646
70870	LHF	Lower Hafren	2005.07.26 09:26	2005.07.26 09:26	2005	7	26	09:26	2005.07.26	2005.56546	2005.56546	0.054002	-1.2675902	7.1	-5.98	-36.666	0.0537	0.0135005			stream	Main Hafren stream channel above lower flume	0	7.1	-5.98	-36.666
70882	LHF	Lower Hafren	2005.08.02 11:08	2005.08.02 11:08	2005	8	2	11:08	2005.08.02	2005.584833	2005.584833	0.06999144	-1.1549551	6.8	-5.696	-36.682	0.0696	0.01749786			stream	Main Hafren stream channel above lower flume	0	6.8	-5.696	-36.682
70894	LHF	Lower Hafren	2005.08.09 11:35	2005.08.09 11:35	2005	8	9	11:35	2005.08.09	2005.604062	2005.604062	0.08014824	-1.096106	6.4	-6.086	-37.371	0.0797	0.02003706			stream	Main Hafren stream channel above lower flume	0	6.4	-6.086	-37.371
70906	LHF	Lower Hafren	2005.08.16 13:00	2005.08.16 13:00	2005	8	16	13:00	2005.08.16	2005.623402	2005.623402	0.05822564	-1.2348857	6.9	-6.105	-37.715	0.0579	0.01455641			stream	Main Hafren stream channel above lower flume	0	6.9	-6.105	-37.715
70918	LHF	Lower Hafren	2005.08.23 09:40	2005.08.23 09:40	2005	8	23	09:40	2005.08.23	2005.642199	2005.642199	0.04525308	-1.3443519	7	-6.142	-37.737	0.045	0.01131327			stream	Main Hafren stream channel above lower flume	0	7	-6.142	-37.737
70930	LHF	Lower Hafren	2005.08.30 11:47	2005.08.30 11:47	2005	8	30	11:47	2005.08.30	2005.661619	2005.661619	0.05822564	-1.2348857	7	-5.976	-36.646	0.0579	0.01455641			stream	Main Hafren stream channel above lower flume	0	7	-5.976	-36.646
70942	LHF	Lower Hafren	2005.09.06 11:10	2005.09.06 11:10	2005	9	6	11:10	2005.09.06	2005.680727	2005.680727	0.04203508	-1.3763881	6.4	-6.009	-37.14	0.0418	0.01050877			stream	Main Hafren stream channel above lower flume	0	6.4	-6.009	-37.14
70954	LHF	Lower Hafren	2005.09.13 10:56	2005.09.13 10:56	2005	9	13	10:56	2005.09.13	2005.699878	2005.699878	0.04585644	-1.3385997	6.4	-6.041	-36.981	0.0456	0.01146411			stream	Main Hafren stream channel above lower flume	0	6.4	-6.041	-36.981
70966	LHF	Lower Hafren	2005.09.20 11:09	2005.09.20 11:09	2005	9	20	11:09	2005.09.20	2005.719081	2005.719081	0.08909828	-1.0501307	6.3	-5.897	-37.954	0.0886	0.02227457			stream	Main Hafren stream channel above lower flume	0	6.3	-5.897	-37.954
70978	LHF	Lower Hafren	2005.09.27 11:25	2005.09.27 11:25	2005	9	27	11:25	2005.09.27	2005.73829	2005.73829	0.18996236	-0.7213324	5.8	-5.268	-32.721	0.1889	0.04749059			stream	Main Hafren stream channel above lower flume	0	5.8	-5.268	-32.721
70990	LHF	Lower Hafren	2005.10.04 09:33	2005.10.04 09:33	2005	10	4	09:33	2005.10.04	2005.757255	2005.757255	0.19106856	-0.7188108	6.8	-5.617	-34.607	0.19	0.04776714			stream	Main Hafren stream channel above lower flume	0	6.8	-5.617	-34.607
71002	LHF	Lower Hafren	2005.10.11 09:32	2005.10.11 09:32	2005	10	11	09:32	2005.10.11	2005.776431	2005.776431	0.108004	-0.9665602	6.6			0.1074	0.027001			stream	Main Hafren stream channel above lower flume	0	6.6	-5.316	-34.845
71014	LHF	Lower Hafren	2005.10.18 09:22	2005.10.18 09:22	2005	10	18	09:22	2005.10.18	2005.79559	2005.79559	0.10096464	-0.9958307	6.9	-5.724	-35.651	0.1004	0.02524116			stream	Main Hafren stream channel above lower flume	0	6.9	-5.724	-35.651
71026	LHF	Lower Hafren	2005.10.25 11:13	2005.10.25 11:13	2005	10	25	11:13	2005.10.25	2005.814979	2005.814979	0.89520648	-0.0480768	5.4	-6.314	-39.581	0.8902	0.22380162			stream	Main Hafren stream channel above lower flume	0	5.4	-6.314	-39.581
71038	LHF	Lower Hafren	2005.11.01 10:55	2005.11.01 10:55	2005	11	1	10:55	2005.11.01	2005.834123	2005.834123	0.24567396	-0.6096409	6.9	-5.999	-37.07	0.2443	0.06141849			stream	Main Hafren stream channel above lower flume	0	6.9	-5.999	-37.07
71050	LHF	Lower Hafren	2005.11.08 11:15	2005.11.08 11:15	2005	11	8	11:15	2005.11.08	2005.853339	2005.853339	1.61935632	0.20934242	5.6			1.6103	0.40483908			stream	Main Hafren stream channel above lower flume	0.2	5.6	-0.624	-23.084
71062	LHF	Lower Hafren	2005.11.15 16:03	2005.11.15 16:03	2005	11	15	16:03	2005.11.15	2005.873065	2005.873065	0.22294684	-0.6517987	6.6	-5.706	-34.917	0.2217	0.05573671			stream	Main Hafren stream channel above lower flume	0	6.6	-5.706	-34.917
71074	LHF	Lower Hafren	2005.11.22 10:28	2005.11.22 10:28	2005	11	22	10:28	2005.11.22	2005.891606	2005.891606	0.11433944	-0.9418039	6.8	-6.002	-36.58	0.1137	0.02858486			stream	Main Hafren stream channel above lower flume	0	6.8	-6.002	-36.58
71085	LHF	Lower Hafren	2005.11.29 10:10	2005.11.29 10:10	2005	11	29	10:10	2005.11.29	2005.91075	2005.91075	0.06395768	-1.1941073	7.1	-5.996	-36.754	0.0636	0.01598942			stream	Main Hafren stream channel above lower flume	0	7.1	-5.996	-36.754
71096	LHF	Lower Hafren	2005.12.05 13:03	2005.12.05 13:03	2005	12	5	13:03	2005.12.05	2005.927517	2005.927517	0.38867368	-0.4104149	6.2			0.3865	0.09716842			stream	Main Hafren stream channel above lower flume	0.33333	6.2	1.151	-18.85
71108	LHF	Lower Hafren	2005.12.12 10:35	2005.12.12 10:35	2005	12	12	10:35	2005.12.12	2005.946414	2005.946414	0.13988232	-0.8542372	6.7	-6.158	-37.023	0.1391	0.03497058			stream	Main Hafren stream channel above lower flume	0	6.7	-6.158	-37.023
71120	LHF	Lower Hafren	2005.12.20 11:05	2005.12.20 11:05	2005	12	20	11:05	2005.12.20	2005.968389	2005.968389	0.14289916	-0.8449703	6.4			0.1421	0.03572479			stream	Main Hafren stream channel above lower flume	0	6.4	-5.349	-35.139
71132	LHF	Lower Hafren	2006.01.03 12:38	2006.01.03 12:38	2006	1	3	12:38	2006.01.03	2006.006922	2006.006922	0.29645796	-0.5280369	6.4			0.2948	0.07411449			stream	Main Hafren stream channel above lower flume	0	6.4	-5.12	-34.399
71144	LHF	Lower Hafren	2006.01.10 10:17	2006.01.10 10:17	2006	1	10	10:17	2006.01.10	2006.025831	2006.025831	0.84522696	-0.0730267	5.7	-6.307	-38.332	0.8405	0.21130674			stream	Main Hafren stream channel above lower flume	0	5.7	-6.307	-38.332
71156	LHF	Lower Hafren	2006.01.17 10:36	2006.01.17 10:36	2006	1	17	10:36	2006.01.17	2006.045046	2006.045046	0.31918504	-0.4959575	5.9	-5.832	-36.264	0.3174	0.07979626			stream	Main Hafren stream channel above lower flume	0	5.9	-5.832	-36.264
71168	LHF	Lower Hafren	2006.01.24 10:05	2006.01.24 10:05	2006	1	24	10:05	2006.01.24	2006.064165	2006.064165	0.17367128	-0.760272	6.5	-6.085	-36.563	0.1727	0.04341782			stream	Main Hafren stream channel above lower flume	0	6.5	-6.085	-36.563
71180	LHF	Lower Hafren	2006.01.31 11:31	2006.01.31 11:31	2006	1	31	11:31	2006.01.31	2006.083507	2006.083507	0.07300832	-1.1366276	6.3	-6.107	-37.228	0.0726	0.01825208			stream	Main Hafren stream channel above lower flume	0	6.3	-6.107	-37.228
71190	LHF	Lower Hafren	2006.02.07 10:14	2006.02.07 10:14	2006	2	7	10:14	2006.02.07	2006.102538	2006.102538	0.0518902	-1.2849147	6.8	-6.167	-37.21	0.0516	0.01297255			stream	Main Hafren stream channel above lower flume	0	6.8	-6.167	-37.21
71201	LHF	Lower Hafren	2006.02.14 13:34	2006.02.14 13:34	2006	2	14	13:34	2006.02.14	2006.122097	2006.122097	0.24084696	-0.6182588	6.1			0.2395	0.06021174			stream	Main Hafren stream channel above lower flume	0.25	6.1	-0.343	-21.673
71213	LHF	Lower Hafren	2006.02.21 09:33	2006.02.21 09:33	2006	2	21	09:33	2006.02.21	2006.140816	2006.140816	0.1235912	-0.9080125	6.7	-6.043	-36.298	0.1229	0.0308978			stream	Main Hafren stream channel above lower flume	0	6.7	-6.043	-36.298
71225	LHF	Lower Hafren	2006.02.28 10:15	2006.02.28 10:15	2006	2	28	10:15	2006.02.28	2006.160074	2006.160074	0.08014824	-1.096106	6.2			0.0797	0.02003706			stream	Main Hafren stream channel above lower flume	0	6.2	-5.4	-35.181
71237	LHF	Lower Hafren	2006.03.07 10:10	2006.03.07 10:10	2006	3	7	10:10	2006.03.07	2006.179243	2006.179243	0.15898916	-0.7986325	6.8			0.1581	0.03974729			stream	Main Hafren stream channel above lower flume		6.8
71249	LHF	Lower Hafren	2006.03.14 10:43	2006.03.14 10:43	2006	3	14	10:43	2006.03.14	2006.198484	2006.198484	0.53619872	-0.2706742	6.8			0.5332	0.13404968			stream	Main Hafren stream channel above lower flume	0	6.8	-5.103	-34.244
71260	LHF	Lower Hafren	2006.03.21 09:47	2006.03.21 09:47	2006	3	21	09:47	2006.03.21	2006.217555	2006.217555	0.10629444	-0.9734895	7.5	-6.187	-37.215	0.1057	0.02657361			stream	Main Hafren stream channel above lower flume	0	7.5	-6.187	-37.215
71272	LHF	Lower Hafren	2006.03.27 10:19	2006.03.27 10:19	2006	3	27	10:19	2006.03.27	2006.234054	2006.234054	2.4466832	0.38857774	7			2.433	0.6116708			stream	Main Hafren stream channel above lower flume	0.125	7	-3.589	-33.432
71284	LHF	Lower Hafren	2006.04.04 08:35	2006.04.04 08:35	2006	4	4	08:35	2006.04.04	2006.255774	2006.255774	0.28861408	-0.5396825	4.8	-6.089	-37.129	0.287	0.07215352			stream	Main Hafren stream channel above lower flume	0	4.8	-6.089	-37.129
71296	LHF	Lower Hafren	2006.04.11 10:12	2006.04.11 10:12	2006	4	11	10:12	2006.04.11	2006.275137	2006.275137	0.51266712	-0.2901645	6.4			0.5098	0.12816678			stream	Main Hafren stream channel above lower flume	0	6.4	-5.399	-35.561
71308	LHF	Lower Hafren	2006.04.18 10:11	2006.04.18 10:11	2006	4	18	10:11	2006.04.18	2006.294313	2006.294313	0.12449624	-0.9048438	6.5	-5.969	-35.895	0.1238	0.03112406			stream	Main Hafren stream channel above lower flume	0	6.5	-5.969	-35.895
71320	LHF	Lower Hafren	2006.04.25 09:48	2006.04.25 09:48	2006	4	25	09:48	2006.04.25	2006.313448	2006.313448	0.15898916	-0.7986325	6.2	-5.556	-35.245	0.1581	0.03974729			stream	Main Hafren stream channel above lower flume	0	6.2	-5.556	-35.245
71332	LHF	Lower Hafren	2006.05.02 09:18	2006.05.02 09:18	2006	5	2	09:18	2006.05.02	2006.332569	2006.332569	0.08577972	-1.0666154	6.8	-6.069	-37.235	0.0853	0.02144493			stream	Main Hafren stream channel above lower flume	0	6.8	-6.069	-37.235
71344	LHF	Lower Hafren	2006.05.09 10:10	2006.05.09 10:10	2006	5	9	10:10	2006.05.09	2006.351846	2006.351846	0.12640692	-0.8982292	5.8	-6.107	-38.62	0.1257	0.03160173			stream	Main Hafren stream channel above lower flume	0	5.8	-6.107	-38.62
71356	LHF	Lower Hafren	2006.05.16 09:32	2006.05.16 09:32	2006	5	16	09:32	2006.05.16	2006.370951	2006.370951	0.08014824	-1.096106	6.2	-6.104	-37.638	0.0797	0.02003706			stream	Main Hafren stream channel above lower flume	0	6.2	-6.104	-37.638
71368	LHF	Lower Hafren	2006.05.23 09:48	2006.05.23 09:48	2006	5	23	09:48	2006.05.23	2006.39016	2006.39016	0.39159	-0.4071684	5.8			0.3894	0.0978975			stream	Main Hafren stream channel above lower flume	0.66666	5.8	8.816	1.366
71380	LHF	Lower Hafren	2006.05.30 08:32	2006.05.30 08:32	2006	5	30	08:32	2006.05.30	2006.409193	2006.409193	0.17900108	-0.7471443	6.3			0.178	0.04475027			stream	Main Hafren stream channel above lower flume	0	6.3	-5.512	-35.301
71391	LHF	Lower Hafren	2006.06.06 09:58	2006.06.06 09:58	2006	6	6	09:58	2006.06.06	2006.428535	2006.428535	0.0754218	-1.1225031	5.9			0.075	0.01885545			stream	Main Hafren stream channel above lower flume	0.33333	5.9	4.745	-9.159
71401	LHF	Lower Hafren	2006.06.13 10:06	2006.06.13 10:06	2006	6	13	10:06	2006.06.13	2006.447728	2006.447728	0.049175	-1.3082556	6	-5.616	-35.268	0.0489	0.01229375			stream	Main Hafren stream channel above lower flume	0	6	-5.616	-35.268
71413	LHF	Lower Hafren	2006.06.20 09:18	2006.06.20 09:18	2006	6	20	09:18	2006.06.20	2006.466815	2006.466815	0.04263844	-1.3701987	6.1			0.0424	0.01065961			stream	Main Hafren stream channel above lower flume	0	6.1	-4.836	-34.389
71425	LHF	Lower Hafren	2006.06.27 08:55	2006.06.27 08:55	2006	6	27	08:55	2006.06.27	2006.485949	2006.485949	0.0272524	-1.5645952	6.3	-5.742	-37.101	0.0271	0.0068131			stream	Main Hafren stream channel above lower flume	0	6.3	-5.742	-37.101
71437	LHF	Lower Hafren	2006.07.04 09:43	2006.07.04 09:43	2006	7	4	09:43	2006.07.04	2006.505219	2006.505219	0.0262468	-1.5809236	6.1	-5.852	-37.136	0.0261	0.0065617			stream	Main Hafren stream channel above lower flume	0	6.1	-5.852	-37.136
71448	LHF	Lower Hafren	2006.07.11 10:09	2006.07.11 10:09	2006	7	11	10:09	2006.07.11	2006.524446	2006.524446	0.03006816	-1.5218931	6.3	-5.851	-36.998	0.0299	0.00751704			stream	Main Hafren stream channel above lower flume	0	6.3	-5.851	-36.998
71460	LHF	Lower Hafren	2006.07.18 09:46	2006.07.18 09:46	2006	7	18	09:46	2006.07.18	2006.543581	2006.543581	0.0246378	-1.6083981	6.3	-5.73	-36.555	0.0245	0.00615945			stream	Main Hafren stream channel above lower flume	0	6.3	-5.73	-36.555
71470	LHF	Lower Hafren	2006.07.25 09:20	2006.07.25 09:20	2006	7	25	09:20	2006.07.25	2006.562709	2006.562709	0.02413496	-1.6173534	6.2	-5.881	-36.779	0.024	0.00603374			stream	Main Hafren stream channel above lower flume	0	6.2	-5.881	-36.779
71480	LHF	Lower Hafren	2006.08.01 10:43	2006.08.01 10:43	2006	8	1	10:43	2006.08.01	2006.582045	2006.582045	0.02896196	-1.5381721	7			0.0288	0.00724049			stream	Main Hafren stream channel above lower flume	0.125	7	-3.049	-28.985
71492	LHF	Lower Hafren	2006.08.08 09:30	2006.08.08 09:30	2006	8	8	09:30	2006.08.08	2006.601085	2006.601085	0.0246378	-1.6083981	6.7	-5.925	-36.484	0.0245	0.00615945			stream	Main Hafren stream channel above lower flume	0	6.7	-5.925	-36.484
71503	LHF	Lower Hafren	2006.08.15 10:48	2006.08.15 10:48	2006	8	15	10:48	2006.08.15	2006.620411	2006.620411	0.02413496	-1.6173534	6.2	-5.78	-36.435	0.024	0.00603374			stream	Main Hafren stream channel above lower flume	0	6.2	-5.78	-36.435
71512	LHF	Lower Hafren	2006.08.22 09:04	2006.08.22 09:04	2006	8	22	09:04	2006.08.22	2006.639391	2006.639391	0.1599948	-0.7958941	5.9	-6.232	-39.815	0.1591	0.0399987			stream	Main Hafren stream channel above lower flume	0	5.9	-6.232	-39.815
71523	LHF	Lower Hafren	2006.08.29 12:32	2006.08.29 12:32	2006	8	29	12:32	2006.08.29	2006.658965	2006.658965	0.10709896	-0.9702147	5.9	-6.051	-38.553	0.1065	0.02677474			stream	Main Hafren stream channel above lower flume	0	5.9	-6.051	-38.553
71532	LHF	Lower Hafren	2006.09.05 09:18	2006.09.05 09:18	2006	9	5	09:18	2006.09.05	2006.677774	2006.677774	0.22767328	-0.6426879	6.3	-5.828	-36.223	0.2264	0.05691832			stream	Main Hafren stream channel above lower flume	0	6.3	-5.828	-36.223
71543	LHF	Lower Hafren	2006.09.12 11:01	2006.09.12 11:01	2006	9	12	11:01	2006.09.12	2006.697148	2006.697148	0.08095272	-1.0917686	6.1	-5.957	-37.011	0.0805	0.02023818			stream	Main Hafren stream channel above lower flume	0	6.1	-5.957	-37.011
71552	LHF	Lower Hafren	2006.09.19 09:28	2006.09.19 09:28	2006	9	19	09:28	2006.09.19	2006.716149	2006.716149	0.05963352	-1.2245096	6.2	-5.989	-36.455	0.0593	0.01490838			stream	Main Hafren stream channel above lower flume	0	6.2	-5.989	-36.455
71563	LHF	Lower Hafren	2006.09.26 12:28	2006.09.26 12:28	2006	9	26	12:28	2006.09.26	2006.73567	2006.73567	0.03831428	-1.4166393	6.3	-6.159	-37.423	0.0381	0.00957857			stream	Main Hafren stream channel above lower flume	0	6.3	-6.159	-37.423
71572	LHF	Lower Hafren	2006.10.03 09:24	2006.10.03 09:24	2006	10	3	09:24	2006.10.03	2006.754498	2006.754498	0.29515064	-0.5299563		-5.815	-35.491	0.2935	0.07378766			stream	Main Hafren stream channel above lower flume	0	13.6	-5.815	-35.491
71583	LHF	Lower Hafren	2006.10.10 11:52	2006.10.10 11:52	2006	10	10	11:52	2006.10.10	2006.773957	2006.773957	0.1663302	-0.7790289	6.1	-5.839	-35.503	0.1654	0.04158255			stream	Main Hafren stream channel above lower flume	0	6.1	-5.839	-35.503
71592	LHF	Lower Hafren	2006.10.17 09:19	2006.10.17 09:19	2006	10	17	09:19	2006.10.17	2006.792844	2006.792844	0.10709896	-0.9702147	6.3	-5.829	-35.831	0.1065	0.02677474			stream	Main Hafren stream channel above lower flume	0	6.3	-5.829	-35.831
71603	LHF	Lower Hafren	2006.10.24 09:00	2006.10.24 09:00	2006	10	24	09:00	2006.10.24	2006.811986	2006.811986	0.264278	-0.577939	6.2	-5.833	-35.632	0.2628	0.0660695			stream	Main Hafren stream channel above lower flume	0	6.2	-5.833	-35.632
71612	LHF	Lower Hafren	2006.10.31 10:15	2006.10.31 10:15	2006	10	31	10:15	2006.10.31	2006.831307	2006.831307	0.23843344	-0.6226328	6.4	-5.79	-34.862	0.2371	0.05960836			stream	Main Hafren stream channel above lower flume	0	6.4	-5.79	-34.862
71623	LHF	Lower Hafren	2006.11.08 14:00	2006.11.08 14:00	2006	11	8	14:00	2006.11.08	2006.853653	2006.853653	0.13304404	-0.8760046	6.7	-5.753	-34.889	0.1323	0.03326101			stream	Main Hafren stream channel above lower flume	0	6.7	-5.753	-34.889
71632	LHF	Lower Hafren	2006.11.14 10:22	2006.11.14 10:22	2006	11	14	10:22	2006.11.14	2006.869677	2006.869677	0.30842488	-0.5108506	7.9	-5.628	-33.735	0.3067	0.07710622			stream	Main Hafren stream channel above lower flume	0	7.9	-5.628	-33.735
71643	LHF	Lower Hafren	2006.11.21 10:20	2006.11.21 10:20	2006	11	21	10:20	2006.11.21	2006.888851	2006.888851	0.42779244	-0.3687669	6.5	-5.547	-33.118	0.4254	0.10694811			stream	Main Hafren stream channel above lower flume	0	6.5	-5.547	-33.118
71652	LHF	Lower Hafren	2006.11.28 10:20	2006.11.28 10:20	2006	11	28	10:20	2006.11.28	2006.908029	2006.908029	0.54474652	-0.2638055	6.8	-6.08	-35.149	0.5417	0.13618663			stream	Main Hafren stream channel above lower flume	0	6.8	-6.08	-35.149
71663	LHF	Lower Hafren	2006.12.05 13:55	2006.12.05 13:55	2006	12	5	13:55	2006.12.05	2006.927616	2006.927616	1.42225404	0.15297718	9.5	-5.862	-33.919	1.4143	0.35556351			stream	Main Hafren stream channel above lower flume	0	9.5	-5.862	-33.919
71672	LHF	Lower Hafren	2006.12.12 10:25	2006.12.12 10:25	2006	12	12	10:25	2006.12.12	2006.946395	2006.946395	0.52614248	-0.2788966	11.1	-5.753	-33.207	0.5232	0.13153562			stream	Main Hafren stream channel above lower flume	0	11.1	-5.753	-33.207
71683	LHF	Lower Hafren	2006.12.19 10:35	2006.12.19 10:35	2006	12	19	10:35	2006.12.19	2006.965592	2006.965592	0.2605572	-0.5840969	8.8	-5.727	-33.173	0.2591	0.0651393			stream	Main Hafren stream channel above lower flume	0	8.8	-5.727	-33.173
71692	LHF	Lower Hafren	2007.01.02 10:42	2007.01.02 10:42	2007	1	2	10:42	2007.01.02	2007.003961	2007.003961	0.41411596	-0.382878	8.5	-5.636	-35.054	0.4118	0.10352899			stream	Main Hafren stream channel above lower flume	0	8.5	-5.636	-35.054
71703	LHF	Lower Hafren	2007.01.09 10:47	2007.01.09 10:47	2007	1	9	10:47	2007.01.09	2007.023149	2007.023149	1.92225028	0.28380993	8.3	-5.46	-32.136	1.9115	0.48056257			stream	Main Hafren stream channel above lower flume	0	8.3	-5.46	-32.136
71714	LHF	Lower Hafren	2007.01.16 13:13	2007.01.16 13:13	2007	1	16	13:13	2007.01.16	2007.042605	2007.042605	0.29122872	-0.5357658	8.1	-5.654	-33.432	0.2896	0.07280718			stream	Main Hafren stream channel above lower flume	0	8.1	-5.654	-33.432
71723	LHF	Lower Hafren	2007.01.23 13:25	2007.01.23 13:25	2007	1	23	13:25	2007.01.23	2007.061806	2007.061806	0.28730676	-0.5416542	8.7	-5.422	-32.857	0.2857	0.07182669			stream	Main Hafren stream channel above lower flume	0	8.7	-5.422	-32.857
71734	LHF	Lower Hafren	2007.01.31 10:37	2007.01.31 10:37	2007	1	31	10:37	2007.01.31	2007.083404	2007.083404	0.10629444	-0.9734895	8.4	-5.757	-34.307	0.1057	0.02657361			stream	Main Hafren stream channel above lower flume	0	8.4	-5.757	-34.307
71743	LHF	Lower Hafren	2007.02.06 10:25	2007.02.06 10:25	2007	2	6	10:25	2007.02.06	2007.099819	2007.099819	0.06546612	-1.1839834	9.5	-5.835	-35.118	0.0651	0.01636653			stream	Main Hafren stream channel above lower flume	0	9.5	-5.835	-35.118
71754	LHF	Lower Hafren	2007.02.13 13:43	2007.02.13 13:43	2007	2	13	13:43	2007.02.13	2007.119374	2007.119374	0.50934856	-0.2929849	8.8	-6.409	-38.862	0.5065	0.12733714			stream	Main Hafren stream channel above lower flume	0	8.8	-6.409	-38.862
71763	LHF	Lower Hafren	2007.02.21 10:20	2007.02.21 10:20	2007	2	21	10:20	2007.02.21	2007.140906	2007.140906	0.15597228	-0.8069526	8	-6.134	-37.65	0.1551	0.03899307			stream	Main Hafren stream channel above lower flume	0	8	-6.134	-37.65
71774	LHF	Lower Hafren	2007.02.27 13:23	2007.02.27 13:23	2007	2	27	13:23	2007.02.27	2007.157692	2007.157692	0.68141084	-0.166591	5.3	-6.295	-39.119	0.6776	0.17035271			stream	Main Hafren stream channel above lower flume	0	5.3	-6.295	-39.119
71783	LHF	Lower Hafren	2007.03.06 12:58	2007.03.06 12:58	2007	3	6	12:58	2007.03.06	2007.176823	2007.176823	0.87217768	-0.059395	9.5	-6.899	-43.839	0.8673	0.21804442			stream	Main Hafren stream channel above lower flume	0	9.5	-6.899	-43.839
71794	LHF	Lower Hafren	2007.03.13 12:00	2007.03.13 12:00	2007	3	13	12:00	2007.03.13	2007.19589	2007.19589	0.14480984	-0.8392019	7.9	-6.289	-38.907	0.144	0.03620246			stream	Main Hafren stream channel above lower flume	0	7.9	-6.289	-38.907
71803	LHF	Lower Hafren	2007.03.20 10:30	2007.03.20 10:30	2007	3	20	10:30	2007.03.20	2007.214897	2007.214897	0.18332524	-0.7367777	8.8	-6.215	-38.173	0.1823	0.04583131			stream	Main Hafren stream channel above lower flume	0	8.8	-6.215	-38.173
71814	LHF	Lower Hafren	2007.03.27 12:40	2007.03.27 12:40	2007	3	27	12:40	2007.03.27	2007.234323	2007.234323	0.10277476	-0.9881135	7.9	-6.23	-37.638	0.1022	0.02569369			stream	Main Hafren stream channel above lower flume	0	7.9	-6.23	-37.638
71823	LHF	Lower Hafren	2007.04.03 09:22	2007.04.03 09:22	2007	4	3	09:22	2007.04.03	2007.253124	2007.253124	0.05963352	-1.2245096	7.4	-5.941	-36.949	0.0593	0.01490838			stream	Main Hafren stream channel above lower flume	0	7.4	-5.941	-36.949
71834	LHF	Lower Hafren	2007.04.10 13:30	2007.04.10 13:30	2007	4	10	13:30	2007.04.10	2007.272774	2007.272774	0.04072776	-1.3901095	6.8	-6.083	-37.259	0.0405	0.01018194			stream	Main Hafren stream channel above lower flume	0	6.8	-6.083	-37.259
71843	LHF	Lower Hafren	2007.04.17 09:30	2007.04.17 09:30	2007	4	17	09:30	2007.04.17	2007.291495	2007.291495	0.03409064	-1.4673648	7	-6.059	-37.077	0.0339	0.00852266			stream	Main Hafren stream channel above lower flume	0	7	-6.059	-37.077
71854	LHF	Lower Hafren	2007.04.24 12:22	2007.04.24 12:22	2007	4	24	12:22	2007.04.24	2007.311001	2007.311001	0.13505532	-0.8694883	8.5	-6.262	-39.691	0.1343	0.03376383			stream	Main Hafren stream channel above lower flume	0	8.5	-6.262	-39.691
71863	LHF	Lower Hafren	2007.05.01 09:31	2007.05.01 09:31	2007	5	1	09:31	2007.05.01	2007.329854	2007.329854	0.03590076	-1.4448964	7.4	-6.086	-37.493	0.0357	0.00897519			stream	Main Hafren stream channel above lower flume	0	7.4	-6.086	-37.493
71874	LHF	Lower Hafren	2007.05.08 11:54	2007.05.08 11:54	2007	5	8	11:54	2007.05.08	2007.349304	2007.349304	0.07612572	-1.1184686	8	-5.995	-36.326	0.0757	0.01903143			stream	Main Hafren stream channel above lower flume	0	8	-5.995	-36.326
71883	LHF	Lower Hafren	2007.05.15 16:30	2007.05.15 16:30	2007	5	15	16:30	2007.05.15	2007.369007	2007.369007	0.29384332	-0.5318842	7.5	-6.465	-40.654	0.2922	0.07346083			stream	Main Hafren stream channel above lower flume	0	7.5	-6.465	-40.654
71894	LHF	Lower Hafren	2007.05.22 11:00	2007.05.22 11:00	2007	5	22	11:00	2007.05.22	2007.387557	2007.387557	0.14380424	-0.8422283	7.4	-6.252	-38.904	0.143	0.03595106			stream	Main Hafren stream channel above lower flume	0	7.4	-6.252	-38.904
71903	LHF	Lower Hafren	2007.05.29 09:25	2007.05.29 09:25	2007	5	29	09:25	2007.05.29	2007.406554	2007.406554	0.06395768	-1.1941073	7.6	-6.21	-38.195	0.0636	0.01598942			stream	Main Hafren stream channel above lower flume	0	7.6	-6.21	-38.195
71914	LHF	Lower Hafren	2007.06.05 11:30	2007.06.05 11:30	2007	6	5	11:30	2007.06.05	2007.42597	2007.42597	0.04786772	-1.3199573	6.8	-6.216	-37.996	0.0476	0.01196693			stream	Main Hafren stream channel above lower flume	0	6.8	-6.216	-37.996
71923	LHF	Lower Hafren	2007.06.12 09:53	2007.06.12 09:53	2007	6	12	09:53	2007.06.12	2007.444964	2007.444964	0.03952104	-1.4031716	7.3	-6.111	-37.442	0.0393	0.00988026			stream	Main Hafren stream channel above lower flume	0	7.3	-6.111	-37.442
71934	LHF	Lower Hafren	2007.06.19 10:04	2007.06.19 10:04	2007	6	19	10:04	2007.06.19	2007.464163	2007.464163	0.07149988	-1.1456947	6.9	-6.228	-38.767	0.0711	0.01787497			stream	Main Hafren stream channel above lower flume	0	6.9	-6.228	-38.767
71943	LHF	Lower Hafren	2007.06.26 09:28	2007.06.26 09:28	2007	6	26	09:28	2007.06.26	2007.483273	2007.483273	0.33567728	-0.4740781	8.2	-6.584	-43.233	0.3338	0.08391932			stream	Main Hafren stream channel above lower flume	0	8.2	-6.584	-43.233
71954	LHF	Lower Hafren	2007.07.03 09:40	2007.07.03 09:40	2007	7	3	09:40	2007.07.03	2007.502473	2007.502473	0.56888148	-0.2449782	6.9	-6.383	-41.465	0.5657	0.14222037			stream	Main Hafren stream channel above lower flume	0	6.9	-6.383	-41.465
71963	LHF	Lower Hafren	2007.07.10 09:30	2007.07.10 09:30	2007	7	10	09:30	2007.07.10	2007.521632	2007.521632	0.34683972	-0.4598712	6.9	-6.323	-41.446	0.3449	0.08670993			stream	Main Hafren stream channel above lower flume	0	6.9	-6.323	-41.446
71974	LHF	Lower Hafren	2007.07.17 12:15	2007.07.17 12:15	2007	7	17	12:15	2007.07.17	2007.541124	2007.541124	0.18332524	-0.7367777	6.62	-6.447	-40.659	0.1823	0.04583131			stream	Main Hafren stream channel above lower flume	0	6.62	-6.447	-40.659
71983	LHF	Lower Hafren	2007.07.24 09:38	2007.07.24 09:38	2007	7	24	09:38	2007.07.24	2007.560004	2007.560004	0.29253604	-0.5338206	6.52	-6.724	-43.004	0.2909	0.07313401			stream	Main Hafren stream channel above lower flume	0	6.52	-6.724	-43.004
71994	LHF	Lower Hafren	2007.07.31 10:06	2007.07.31 10:06	2007	7	31	10:06	2007.07.31	2007.579235	2007.579235	0.15486608	-0.8100437	6.67	-6.605	-41.729	0.154	0.03871652			stream	Main Hafren stream channel above lower flume	0	6.67	-6.605	-41.729
72003	LHF	Lower Hafren	2007.08.07 09:26	2007.08.07 09:26	2007	8	7	09:26	2007.08.07	2007.598337	2007.598337	0.07461732	-1.1271604	6.79	-6.46	-40.43	0.0742	0.01865433			stream	Main Hafren stream channel above lower flume	0	6.79	-6.46	-40.43
72014	LHF	Lower Hafren	2007.08.14 09:41	2007.08.14 09:41	2007	8	14	09:41	2007.08.14	2007.617544	2007.617544	0.10709896	-0.9702147	6.53	-6.563	-41.468	0.1065	0.02677474			stream	Main Hafren stream channel above lower flume	0	6.53	-6.563	-41.468
72023	LHF	Lower Hafren	2007.08.21 11:45	2007.08.21 11:45	2007	8	21	11:45	2007.08.21	2007.636958	2007.636958	0.09835004	-1.0072255	5.75	-6.47	-41.042	0.0978	0.02458751			stream	Main Hafren stream channel above lower flume	0	5.75	-6.47	-41.042
72034	LHF	Lower Hafren	2007.08.28 10:36	2007.08.28 10:36	2007	8	28	10:36	2007.08.28	2007.656005	2007.656005	0.05752168	-1.2401684	6.75	-6.483	-40.153	0.0572	0.01438042			stream	Main Hafren stream channel above lower flume	0	6.75	-6.483	-40.153
72043	LHF	Lower Hafren	2007.09.04 09:11	2007.09.04 09:11	2007	9	4	09:11	2007.09.04	2007.675021	2007.675021	0.05118628	-1.2908464	6.49	-6.235	-38.671	0.0509	0.01279657			stream	Main Hafren stream channel above lower flume	0	6.49	-6.235	-38.671
72054	LHF	Lower Hafren	2007.09.11 12:23	2007.09.11 12:23	2007	9	11	12:23	2007.09.11	2007.694564	2007.694564	0.03710752	-1.4305381	6.19	-6.325	-39.004	0.0369	0.00927688			stream	Main Hafren stream channel above lower flume	0	6.19	-6.325	-39.004
72063	LHF	Lower Hafren	2007.09.18 10:29	2007.09.18 10:29	2007	9	18	10:29	2007.09.18	2007.713526	2007.713526	0.03288392	-1.4830164	6.9	-6.268	-38.429	0.0327	0.00822098			stream	Main Hafren stream channel above lower flume	0	6.9	-6.268	-38.429
72074	LHF	Lower Hafren	2007.09.25 12:30	2007.09.25 12:30	2007	9	25	12:30	2007.09.25	2007.732934	2007.732934	1.18231212	0.07273214	6.15	-5.461	-32.773	1.1757	0.29557803			stream	Main Hafren stream channel above lower flume	0	6.15	-5.461	-32.773
72083	LHF	Lower Hafren	2007.10.02 09:29	2007.10.02 09:29	2007	10	2	09:29	2007.10.02	2007.751768	2007.751768	0.1053894	-0.9772031	6.98	-5.622	-32.979	0.1048	0.02634735			stream	Main Hafren stream channel above lower flume	0	6.98	-5.622	-32.979
72094	LHF	Lower Hafren	2007.10.09 09:16	2007.10.09 09:16	2007	10	9	09:16	2007.10.09	2007.770921	2007.770921	0.248188	-0.6052192	6.64	-5.935	-34.564	0.2468	0.062047			stream	Main Hafren stream channel above lower flume	0	6.64	-5.935	-34.564
72103	LHF	Lower Hafren	2007.10.16 09:28	2007.10.16 09:28	2007	10	16	09:28	2007.10.16	2007.790122	2007.790122	0.14581548	-0.8361964	6.96	-5.69	-34.087	0.145	0.03645387			stream	Main Hafren stream channel above lower flume	0	6.96	-5.69	-34.087
72114	LHF	Lower Hafren	2007.10.23 09:24	2007.10.23 09:24	2007	10	23	09:24	2007.10.23	2007.809292	2007.809292	0.07693024	-1.1139029	7.04	-5.829	-36.587	0.0765	0.01923256			stream	Main Hafren stream channel above lower flume	0	7.04	-5.829	-36.587
72123	LHF	Lower Hafren	2007.10.30 10:51	2007.10.30 10:51	2007	10	30	10:51	2007.10.30	2007.828636	2007.828636	0.1866438	-0.7289864	7.04	-5.712	-34.292	0.1856	0.04666095			stream	Main Hafren stream channel above lower flume	0	7.04	-5.712	-34.292
72134	LHF	Lower Hafren	2007.11.06 14:05	2007.11.06 14:05	2007	11	6	14:05	2007.11.06	2007.848183	2007.848183	0.0754218	-1.1225031	6.61	-5.881	-35.796	0.075	0.01885545			stream	Main Hafren stream channel above lower flume	0	6.61	-5.881	-35.796
72143	LHF	Lower Hafren	2007.11.13 10:34	2007.11.13 10:34	2007	11	13	10:34	2007.11.13	2007.86696	2007.86696	0.12449624	-0.9048438	7.82	-5.691	-34.068	0.1238	0.03112406			stream	Main Hafren stream channel above lower flume	0	7.82	-5.691	-34.068
72154	LHF	Lower Hafren	2007.11.20 10:25	2007.11.20 10:25	2007	11	20	10:25	2007.11.20	2007.886121	2007.886121	0.12831764	-0.8917136	7.1	-5.844	-35.969	0.1276	0.03207941			stream	Main Hafren stream channel above lower flume	0	7.1	-5.844	-35.969
72163	LHF	Lower Hafren	2007.11.27 10:35	2007.11.27 10:35	2007	11	27	10:35	2007.11.27	2007.905318	2007.905318	0.14983796	-0.8243781	7.43	-5.995	-35.637	0.149	0.03745949			stream	Main Hafren stream channel above lower flume	0	7.43	-5.995	-35.637
72174	LHF	Lower Hafren	2007.12.04 13:05	2007.12.04 13:05	2007	12	4	13:05	2007.12.04	2007.924781	2007.924781	0.47505676	-0.3232545	8.01	-5.827	-34.635	0.4724	0.11876419			stream	Main Hafren stream channel above lower flume	0	8.01	-5.827	-34.635
72183	LHF	Lower Hafren	2007.12.11 10:45	2007.12.11 10:45	2007	12	11	10:45	2007.12.11	2007.943693	2007.943693	0.30309508	-0.5184211	7.79	-5.956	-35.494	0.3014	0.07577377			stream	Main Hafren stream channel above lower flume	0	7.79	-5.956	-35.494
72194	LHF	Lower Hafren	2007.12.18 11:00	2007.12.18 11:00	2007	12	18	11:00	2007.12.18	2007.9629	2007.9629	0.0941264	-1.0262886	7.35	-6.256	-36.677	0.0936	0.0235316			stream	Main Hafren stream channel above lower flume	0	7.35	-6.256	-36.677
72203	LHF	Lower Hafren	2008.01.02 12:08	2008.01.02 12:08	2008	1	2	12:08	2008.01.02	2008.004114	2008.004114	0.14480984	-0.8392019	7.49	-6.011	-35.836	0.144	0.03620246			stream	Main Hafren stream channel above lower flume	0	7.49	-6.011	-35.836
72212	LHF	Lower Hafren	2008.01.08 10:38	2008.01.08 10:38	2008	1	8	10:38	2008.01.08	2008.020336	2008.020336	0.62952064	-0.20099	14.4	-6.177	-34.84	0.626	0.15738016			stream	Main Hafren stream channel above lower flume	0	14.4	-6.177	-34.84
72223	LHF	Lower Hafren	2008.01.15 15:18	2008.01.15 15:18	2008	1	15	15:18	2008.01.15	2008.039993	2008.039993	1.03790452	0.0161574	9.23	-7.422	-44.293	1.0321	0.25947613			stream	Main Hafren stream channel above lower flume	0	9.23	-7.422	-44.293
72232	LHF	Lower Hafren	2008.01.22 10:15	2008.01.22 10:15	2008	1	22	10:15	2008.01.22	2008.058544	2008.058544	0.5899996	-0.2291483	7.05	-5.499	-32.279	0.5867	0.1474999			stream	Main Hafren stream channel above lower flume	0	7.05	-5.499	-32.279
72243	LHF	Lower Hafren	2008.01.29 13:00	2008.01.29 13:00	2008	1	29	13:00	2008.01.29	2008.077983	2008.077983	0.13988232	-0.8542372	7.43	-5.779	-34.442	0.1391	0.03497058			stream	Main Hafren stream channel above lower flume	0	7.43	-5.779	-34.442
72252	LHF	Lower Hafren	2008.02.05 11:27	2008.02.05 11:27	2008	2	5	11:27	2008.02.05	2008.096932	2008.096932	0.29776528	-0.5261259	8.26	-5.517	-32.633	0.2961	0.07444132			stream	Main Hafren stream channel above lower flume	0	8.26	-5.517	-32.633
72263	LHF	Lower Hafren	2008.02.12 12:50	2008.02.12 12:50	2008	2	12	12:50	2008.02.12	2008.116215	2008.116215	0.1053894	-0.9772031	7.37	-6.15	-35.464	0.1048	0.02634735			stream	Main Hafren stream channel above lower flume	0	7.37	-6.15	-35.464
72272	LHF	Lower Hafren	2008.02.19 10:04	2008.02.19 10:04	2008	2	19	10:04	2008.02.19	2008.135026	2008.135026	0.05822564	-1.2348857	7.67	-6.204	-36.001	0.0579	0.01455641			stream	Main Hafren stream channel above lower flume	0	7.67	-6.204	-36.001
72283	LHF	Lower Hafren	2008.02.26 12:55	2008.02.26 12:55	2008	2	26	12:55	2008.02.26	2008.154476	2008.154476	0.43402732	-0.3624829	8.74	-5.37	-32.068	0.4316	0.10850683			stream	Main Hafren stream channel above lower flume	0	8.74	-5.37	-32.068
72292	LHF	Lower Hafren	2008.03.04 11:09	2008.03.04 11:09	2008	3	4	11:09	2008.03.04	2008.173401	2008.173401	0.20032032	-0.698275	7.97	-5.919	-33.672	0.1992	0.05008008			stream	Main Hafren stream channel above lower flume	0	7.97	-5.919	-33.672
72303	LHF	Lower Hafren	2008.03.11 13:35	2008.03.11 13:35	2008	3	11	13:35	2008.03.11	2008.192803	2008.192803	0.57763044	-0.2383499	8.24	-5.743	-33.477	0.5744	0.14440761			stream	Main Hafren stream channel above lower flume	0	8.24	-5.743	-33.477
72312	LHF	Lower Hafren	2008.03.18 11:09	2008.03.18 11:09	2008	3	18	11:09	2008.03.18	2008.211652	2008.211652	0.19770568	-0.7039809	8.41	-5.736	-33.998	0.1966	0.04942642			stream	Main Hafren stream channel above lower flume	0	8.41	-5.736	-33.998
72323	LHF	Lower Hafren	2008.03.25 13:19	2008.03.25 13:19	2008	3	25	13:19	2008.03.25	2008.231024	2008.231024	0.17256508	-0.7630471	8.86	-5.751	-33.8	0.1716	0.04314127			stream	Main Hafren stream channel above lower flume	0	8.86	-5.751	-33.8
72332	LHF	Lower Hafren	2008.04.01 09:51	2008.04.01 09:51	2008	4	1	09:51	2008.04.01	2008.249755	2008.249755	0.361019	-0.4424699	8.47	-5.807	-34.128	0.359	0.09025475			stream	Main Hafren stream channel above lower flume	0	8.47	-5.807	-34.128
72343	LHF	Lower Hafren	2008.04.08 12:20	2008.04.08 12:20	2008	4	8	12:20	2008.04.08	2008.269164	2008.269164	0.12168052	-0.9147789	7.71	-5.855	-34.752	0.121	0.03042013			stream	Main Hafren stream channel above lower flume	0	7.71	-5.855	-34.752
72352	LHF	Lower Hafren	2008.04.15 09:50	2008.04.15 09:50	2008	4	15	09:50	2008.04.15	2008.288005	2008.288005	0.15898916	-0.7986325	8.05	-5.921	-35.159	0.1581	0.03974729			stream	Main Hafren stream channel above lower flume	0	8.05	-5.921	-35.159
72363	LHF	Lower Hafren	2008.04.22 10:04	2008.04.22 10:04	2008	4	22	10:04	2008.04.22	2008.307157	2008.307157	0.0546054	-1.2627644	7.89	-6.021	-35.464	0.0543	0.01365135			stream	Main Hafren stream channel above lower flume	0	7.89	-6.021	-35.464
72372	LHF	Lower Hafren	2008.04.29 09:05	2008.04.29 09:05	2008	4	29	09:05	2008.04.29	2008.326171	2008.326171	0.19328092	-0.713811	7.64	-6.243	-35.763	0.1922	0.04832023			stream	Main Hafren stream channel above lower flume	0	7.64	-6.243	-35.763
72383	LHF	Lower Hafren	2008.05.06 14:30	2008.05.06 14:30	2008	5	6	14:30	2008.05.06	2008.345913	2008.345913	0.09583596	-1.0184715	7.35	-6.325	-36.024	0.0953	0.02395899			stream	Main Hafren stream channel above lower flume	0	7.35	-6.325	-36.024
72392	LHF	Lower Hafren	2008.05.13 10:04	2008.05.13 10:04	2008	5	13	10:04	2008.05.13	2008.364534	2008.364534	0.06104136	-1.2143758	6.99	-6.004	-35.749	0.0607	0.01526034			stream	Main Hafren stream channel above lower flume	0	6.99	-6.004	-35.749
72403	LHF	Lower Hafren	2008.05.20 12:05	2008.05.20 12:05	2008	5	20	12:05	2008.05.20	2008.383889	2008.383889	0.04585644	-1.3385997	7.04	-6.101	-35.832	0.0456	0.01146411			stream	Main Hafren stream channel above lower flume	0	7.04	-6.101	-35.832
72412	LHF	Lower Hafren	2008.05.27 12:26	2008.05.27 12:26	2008	5	27	12:26	2008.05.27	2008.403055	2008.403055	0.04454916	-1.3511605	6.8	-6.167	-36.661	0.0443	0.01113729			stream	Main Hafren stream channel above lower flume	0	6.8	-6.167	-36.661
72423	LHF	Lower Hafren	2008.06.03 12:15	2008.06.03 12:15	2008	6	3	12:15	2008.06.03	2008.42216	2008.42216	0.03469404	-1.4597451	7.15	-6.037	-36.2	0.0345	0.00867351			stream	Main Hafren stream channel above lower flume	0	7.15	-6.037	-36.2
72432	LHF	Lower Hafren	2008.06.10 09:38	2008.06.10 09:38	2008	6	10	09:38	2008.06.10	2008.440987	2008.440987	0.017699	-1.7520513	7.22	-6.079	-36.508	0.0176	0.00442475			stream	Main Hafren stream channel above lower flume	0	7.22	-6.079	-36.508
72443	LHF	Lower Hafren	2008.06.17 12:20	2008.06.17 12:20	2008	6	17	12:20	2008.06.17	2008.460421	2008.460421	0.0267496	-1.5726827	6.64	-5.984	-36.37	0.0266	0.0066874			stream	Main Hafren stream channel above lower flume	0	6.64	-5.984	-36.37
72452	LHF	Lower Hafren	2008.06.24 09:22	2008.06.24 09:22	2008	6	24	09:22	2008.06.24	2008.479208	2008.479208	0.06033744	-1.2194131	6.91	-6.075	-35.891	0.06	0.01508436			stream	Main Hafren stream channel above lower flume	0	6.91	-6.075	-35.891
72463	LHF	Lower Hafren	2008.07.01 12:15	2008.07.01 12:15	2008	7	1	12:15	2008.07.01	2008.498662	2008.498662	0.136966	-0.8633872	8.24	-6.26	-37.155	0.1362	0.0342415			stream	Main Hafren stream channel above lower flume	0	8.24	-6.26	-37.155
72472	LHF	Lower Hafren	2008.07.08 09:08	2008.07.08 09:08	2008	7	8	09:08	2008.07.08	2008.517433	2008.517433	0.28207752	-0.5496315	7.52	-6.217	-36.947	0.2805	0.07051938			stream	Main Hafren stream channel above lower flume	0	7.52	-6.217	-36.947
72483	LHF	Lower Hafren	2008.07.15 12:20	2008.07.15 12:20	2008	7	15	12:20	2008.07.15	2008.536923	2008.536923	0.15386048	-0.8128729	7.22	-6.266	-37.286	0.153	0.03846512			stream	Main Hafren stream channel above lower flume	0	7.22	-6.266	-37.286
72492	LHF	Lower Hafren	2008.07.22 15:40	2008.07.22 15:40	2008	7	22	15:40	2008.07.22	2008.556428	2008.556428	0.136966	-0.8633872	6.7	-6.261	-36.857	0.1362	0.0342415			stream	Main Hafren stream channel above lower flume	0	6.7	-6.261	-36.857
72503	LHF	Lower Hafren	2008.07.29 12:05	2008.07.29 12:05	2008	7	29	12:05	2008.07.29	2008.575146	2008.575146	0.08095272	-1.0917686	7.29	-6.318	-37.241	0.0805	0.02023818			stream	Main Hafren stream channel above lower flume	0	7.29	-6.318	-37.241
72512	LHF	Lower Hafren	2008.08.05 10:45	2008.08.05 10:45	2008	8	5	10:45	2008.08.05	2008.59412	2008.59412	0.41109908	-0.3860535	5.84	-5.855	-35.547	0.4088	0.10277477			stream	Main Hafren stream channel above lower flume	0	5.84	-5.855	-35.547
72523	LHF	Lower Hafren	2008.08.12 10:50	2008.08.12 10:50	2008	8	12	10:50	2008.08.12	2008.613255	2008.613255	0.66823716	-0.1750694	6.76	-5.936	-35.402	0.6645	0.16705929			stream	Main Hafren stream channel above lower flume	0	6.76	-5.936	-35.402
72532	LHF	Lower Hafren	2008.08.19 10:07	2008.08.19 10:07	2008	8	19	10:07	2008.08.19	2008.632299	2008.632299	1.11171732	0.04599437	5.12	-6.11	-36.986	1.1055	0.27792933			stream	Main Hafren stream channel above lower flume	0	5.12	-6.11	-36.986
72543	LHF	Lower Hafren	2008.08.26 12:55	2008.08.26 12:55	2008	8	26	12:55	2008.08.26	2008.651744	2008.651744	0.20333716	-0.6917832	6.43	-5.966	-36.124	0.2022	0.05083429			stream	Main Hafren stream channel above lower flume	0	6.43	-5.966	-36.124
72552	LHF	Lower Hafren	2008.09.02 09:33	2008.09.02 09:33	2008	9	2	09:33	2008.09.02	2008.670486	2008.670486	0.11896532	-0.9245796	6.54	-5.903	-35.394	0.1183	0.02974133			stream	Main Hafren stream channel above lower flume	0	6.54	-5.903	-35.394
72563	LHF	Lower Hafren	2008.09.09 13:05	2008.09.09 13:05	2008	9	9	13:05	2008.09.09	2008.690014	2008.690014	0.26930612	-0.5697538	6.59	-6.308	-38.934	0.2678	0.06732653			stream	Main Hafren stream channel above lower flume	0	6.59	-6.308	-38.934
72572	LHF	Lower Hafren	2008.09.16 09:40	2008.09.16 09:40	2008	9	16	09:40	2008.09.16	2008.708751	2008.708751	0.14480984	-0.8392019	6.6	-5.834	-37.096	0.144	0.03620246			stream	Main Hafren stream channel above lower flume	0	6.6	-5.834	-37.096
72583	LHF	Lower Hafren	2008.09.23 13:25	2008.09.23 13:25	2008	9	23	13:25	2008.09.23	2008.728303	2008.728303	0.07773472	-1.109385	6.64	-6.175	-37.076	0.0773	0.01943368			stream	Main Hafren stream channel above lower flume	0	6.64	-6.175	-37.076
72592	LHF	Lower Hafren	2008.09.30 09:15	2008.09.30 09:15	2008	9	30	09:15	2008.09.30	2008.746955	2008.746955	1.63333452	0.21307514	5.73	-6.578	-41.512	1.6242	0.40833363			stream	Main Hafren stream channel above lower flume	0	5.73	-6.578	-41.512
72603	LHF	Lower Hafren	2008.10.07 11:42	2008.10.07 11:42	2008	10	7	11:42	2008.10.07	2008.766359	2008.766359	0.56888148	-0.2449782	5.42	-6.551	-40.983	0.5657	0.14222037			stream	Main Hafren stream channel above lower flume	0	5.42	-6.551	-40.983
72612	LHF	Lower Hafren	2008.10.14 10:10	2008.10.14 10:10	2008	10	14	10:10	2008.10.14	2008.78531	2008.78531	0.21832096	-0.6609046	6.16	-6.308	-38.262	0.2171	0.05458024			stream	Main Hafren stream channel above lower flume	0	6.16	-6.308	-38.262
72623	LHF	Lower Hafren	2008.10.21 09:03	2008.10.21 09:03	2008	10	21	09:03	2008.10.21	2008.804309	2008.804309	0.55158476	-0.2583877	5.8	-5.847	-34.965	0.5485	0.13789619			stream	Main Hafren stream channel above lower flume	0	5.8	-5.847	-34.965
72632	LHF	Lower Hafren	2008.10.28 11:09	2008.10.28 11:09	2008	10	28	11:09	2008.10.28	2008.823674	2008.823674	0.3440236	-0.4634118	5.73	-6.117	-35.307	0.3421	0.0860059			stream	Main Hafren stream channel above lower flume	0	5.73	-6.117	-35.307
72643	LHF	Lower Hafren	2008.11.04 11:08	2008.11.04 11:08	2008	11	4	11:08	2008.11.04	2008.842798	2008.842798	0.14480984	-0.8392019	6.43	-5.859	-35.819	0.144	0.03620246			stream	Main Hafren stream channel above lower flume	0	6.43	-5.859	-35.819
72652	LHF	Lower Hafren	2008.11.11 11:17	2008.11.11 11:17	2008	11	11	11:17	2008.11.11	2008.86194	2008.86194	0.57592088	-0.2396372	6.49	-6.366	-37.619	0.5727	0.14398022			stream	Main Hafren stream channel above lower flume	0	6.49	-6.366	-37.619
72663	LHF	Lower Hafren	2008.11.18 13:20	2008.11.18 13:20	2008	11	18	13:20	2008.11.18	2008.881299	2008.881299	0.58296024	-0.2343611	5.79	-6.044	-34.612	0.5797	0.14574006			stream	Main Hafren stream channel above lower flume	0	5.79	-6.044	-34.612
72672	LHF	Lower Hafren	2008.11.25 10:06	2008.11.25 10:06	2008	11	25	10:06	2008.11.25	2008.900057	2008.900057	0.32873848	-0.4831495	6.4	-6.098	-34.956	0.3269	0.08218462			stream	Main Hafren stream channel above lower flume	0	6.4	-6.098	-34.956
72683	LHF	Lower Hafren	2008.12.09 11:05	2008.12.09 11:05	2008	12	9	11:05	2008.12.09	2008.93842	2008.93842	0.21248836	-0.6726649	6.42	-6.232	-37.139	0.2113	0.05312209			stream	Main Hafren stream channel above lower flume	0	6.42	-6.232	-37.139
72694	LHF	Lower Hafren	2008.12.16 11:07	2008.12.16 11:07	2008	12	16	11:07	2008.12.16	2008.95755	2008.95755	0.16944764	-0.7709645	6.32	-6.376	-38.139	0.1685	0.04236191			stream	Main Hafren stream channel above lower flume	0	6.32	-6.376	-38.139
72703	LHF	Lower Hafren	2008.12.23 10:20	2008.12.23 10:20	2008	12	23	10:20	2008.12.23	2008.976586	2008.976586	0.3696674	-0.4321888	7.03	-6.145	-36.676	0.3676	0.09241685			stream	Main Hafren stream channel above lower flume	0	7.03	-6.145	-36.676
72714	LHF	Lower Hafren	2009.01.06 10:45	2009.01.06 10:45	2009	1	6	10:45	2009.01.06	2009.014926	2009.014926	0.05995307	-1.2221886	7.73	-6.424	-37.522	0.05962	0.01498827			stream	Main Hafren stream channel above lower flume	0	7.73	-6.424	-37.522
72725	LHF	Lower Hafren	2009.01.13 11:10	2009.01.13 11:10	2009	1	13	11:10	2009.01.13	2009.034151	2009.034151	1.10497964	0.04335428	5.37	-6.234	-35.765	1.0988	0.27624491			stream	Main Hafren stream channel above lower flume	0	5.37	-6.234	-35.765
72734	LHF	Lower Hafren	2009.01.20 10:40	2009.01.20 10:40	2009	1	20	10:40	2009.01.20	2009.053273	2009.053273	0.31516256	-0.5014654	6.68	-6.066	-35.532	0.3134	0.07879064			stream	Main Hafren stream channel above lower flume	0	6.68	-6.066	-35.532
72745	LHF	Lower Hafren	2009.01.27 13:25	2009.01.27 13:25	2009	1	27	13:25	2009.01.27	2009.072765	2009.072765	0.19217476	-0.7163037	6.53	-6.24	-37.998	0.1911	0.04804369			stream	Main Hafren stream channel above lower flume	0	6.53	-6.24	-37.998
72754	LHF	Lower Hafren	2009.02.03 11:03	2009.02.03 11:03	2009	2	3	11:03	2009.02.03	2009.091672	2009.091672	0.108004	-0.9665602	7.03	-6.465	-39.095	0.1074	0.027001			stream	Main Hafren stream channel above lower flume	0	7.03	-6.465	-39.095
72765	LHF	Lower Hafren	2009.02.10 14:25	2009.02.10 14:25	2009	2	10	14:25	2009.02.10	2009.111235	2009.111235	0.07069536	-1.1506091	7.15	-6.537	-39.246	0.0703	0.01767384			stream	Main Hafren stream channel above lower flume	0	7.15	-6.537	-39.246
72774	LHF	Lower Hafren	2009.02.17 11:15	2009.02.17 11:15	2009	2	17	11:15	2009.02.17	2009.130051	2009.130051	0.09493092	-1.0225923	6.34	-6.709	-39.143	0.0944	0.02373273			stream	Main Hafren stream channel above lower flume	0	6.34	-6.709	-39.143
72785	LHF	Lower Hafren	2009.02.24 15:35	2009.02.24 15:35	2009	2	24	15:35	2009.02.24	2009.149724	2009.149724	0.06325376	-1.1989137	7.14	-6.531	-39.073	0.0629	0.01581344			stream	Main Hafren stream channel above lower flume	0	7.14	-6.531	-39.073
72794	LHF	Lower Hafren	2009.03.03 10:10	2009.03.03 10:10	2009	3	3	10:10	2009.03.03	2009.168284	2009.168284	0.068483	-1.1644172	7.05	-6.145	-37.584	0.0681	0.01712075			stream	Main Hafren stream channel above lower flume	0	7.05	-6.145	-37.584
72805	LHF	Lower Hafren	2009.03.10 10:23	2009.03.10 10:23	2009	3	10	10:23	2009.03.10	2009.187487	2009.187487	0.6964952	-0.1570819	7.7	-6.922	-42.574	0.6926	0.1741238			stream	Main Hafren stream channel above lower flume	0	7.7	-6.922	-42.574
72814	LHF	Lower Hafren	2009.03.17 10:05	2009.03.17 10:05	2009	3	17	10:05	2009.03.17	2009.206631	2009.206631	0.13505532	-0.8694883	6.54	-6.585	-38.82	0.1343	0.03376383			stream	Main Hafren stream channel above lower flume	0	6.54	-6.585	-38.82
70520	CR	Rainfall	2004.12.21 10:43	2004.12.17 16:48	2004	12	21	10:43	2004.12.21	2004.971165	2004.960929	0.51276895	-0.2900783	7					85		input	Near met. site at Carreg Wen	0.125	7	-5.332	-50.442
70532	CR	Rainfall	2005.01.04 11:56	2004.12.26 16:57	2005	1	4	11:56	2005.01.04	2005.009581	2004.985538	0.63015865	-0.2005501	4.1	-4.581	-29.634			212.5		input	Near met. site at Carreg Wen	0	4.1	-4.581	-29.634
70544	CR	Rainfall	2005.01.11 12:00	2005.01.07 21:31	2005	1	11	12:00	2005.01.11	2005.028767	2005.018895	0.84490282	-0.0731932	5.5	-2.321	-21.394			142		input	Near met. site at Carreg Wen	0	5.5	-2.321	-21.394
70556	CR	Rainfall	2005.01.18 11:46	2005.01.15 22:52	2005	1	18	11:46	2005.01.18	2005.047919	2005.040967	0.28909199	-0.5389639	14.1					48.5		input	Near met. site at Carreg Wen	0.16666	14.1	1.021	-5.377
70568	CR	Rainfall	2005.01.25 10:45	2005.01.20 08:07	2005	1	25	10:45	2005.01.25	2005.066981	2005.052982	0.48507835	-0.3141881	4.5					81		input	Near met. site at Carreg Wen	0.125	4.5	1.617	-3.049
70580	CR	Rainfall	2005.02.01 15:06	2005.01.26 13:06	2005	2	1	15:06	2005.02.01	2005.086655	2005.069989	0.00870322	-2.06032						1.5		input	Near met. site at Carreg Wen
70591	CR	Rainfall	2005.02.08 13:40	2005.02.04 20:01	2005	2	8	13:40	2005.02.08	2005.10567	2005.095437	0.03301981	-1.4812254						5.5		input	Near met. site at Carreg Wen
70603	CR	Rainfall	2005.02.15 16:35	2005.02.11 06:03	2005	2	15	16:35	2005.02.15	2005.125181	2005.11302	0.92442711	-0.0341273	2.4					158		input	Near met. site at Carreg Wen		2.4
70614	CR	Rainfall	2005.02.22 10:45	2005.02.18 16:13	2005	2	22	10:45	2005.02.22	2005.143693	2005.133359	0.03699897	-1.4318103		-3.089	-12.42			6		input	Near met. site at Carreg Wen	0		-3.089	-12.42
70625	CR	Rainfall	2005.03.01 10:40	2005.02.23 17:45	2005	3	1	10:40	2005.03.01	2005.162862	2005.147232	0.17568238	-0.7552718	3.1	-7.143	-42.94			29.5		input	Near met. site at Carreg Wen	0	3.1	-7.143	-42.94
70636	CR	Rainfall	2005.03.08 10:50	2005.03.06 19:48	2005	3	8	10:50	2005.03.08	2005.182059	2005.177604	0.05054509	-1.296321						8.5		input	Near met. site at Carreg Wen	0.25		-1.131	-19.94
70648	CR	Rainfall	2005.03.15 10:55	2005.03.14 04:13	2005	3	15	10:55	2005.03.15	2005.201246	2005.197743	0.08329202	-1.0793966						14		input	Near met. site at Carreg Wen
70659	CR	Rainfall	2005.03.22 11:20	2005.03.17 06:50	2005	3	22	11:20	2005.03.22	2005.220472	2005.206261	0.20781791	-0.682317	2.8	-4.549	-30.844			35		input	Near met. site at Carreg Wen	0	2.8	-4.549	-30.844
70671	CR	Rainfall	2005.03.29 11:30	2005.03.24 13:23	2005	3	29	11:30	2005.03.29	2005.239669	2005.226186	0.04459861	-1.3506787						7.5		input	Near met. site at Carreg Wen
70683	CR	Rainfall	2005.04.05 14:04	2005.03.30 23:44	2005	4	5	14:04	2005.04.05	2005.25914	2005.243806	0.18467852	-0.7335836	0.6	-10.79	-78.747			31.5		input	Near met. site at Carreg Wen	0	0.6	-10.79	-78.747
70695	CR	Rainfall	2005.04.12 10:04	2005.04.07 23:07	2005	4	12	10:04	2005.04.12	2005.277862	2005.265654	0.32317073	-0.490568	5	-7.421	-50.873			53		input	Near met. site at Carreg Wen	0	5	-7.421	-50.873
70707	CR	Rainfall	2005.04.19 10:21	2005.04.16 21:29	2005	4	19	10:21	2005.04.19	2005.297072	2005.290125	0.32534416	-0.487657	0.8					54.75		input	Near met. site at Carreg Wen	0.125	0.8	-5.401	-61.304
70718	CR	Rainfall	2005.04.26 10:25	2005.04.22 06:12	2005	4	26	10:25	2005.04.26	2005.316258	2005.304819	0.0892503	-1.0493903	0.6					15		input	Near met. site at Carreg Wen	0.5	0.6	4.159	-21.017
70730	CR	Rainfall	2005.05.03 11:21	2005.04.30 06:32	2005	5	3	11:21	2005.05.03	2005.335542	2005.326773	0.25749803	-0.5892261	1.6	-5.233	-35.051			43.5	F,Cl,NO3-by ion chromatography.	input	Near met. site at Carreg Wen	0	1.6	-5.233	-35.051
70742	CR	Rainfall	2005.05.10 10:09	2005.05.06 18:43	2005	5	10	10:09	2005.05.10	2005.354583	2005.344602	0.10791367	-0.9669235	3.4					18		input	Near met. site at Carreg Wen	0.33333	3.4	3.303	-7.273
70754	CR	Rainfall	2005.05.17 10:03	2005.05.16 16:24	2005	5	17	10:03	2005.05.17	2005.37375	2005.371735	0.01786778	-1.7479294						3		input	Near met. site at Carreg Wen
70766	CR	Rainfall	2005.05.24 10:30	2005.05.22 04:40	2005	5	24	10:30	2005.05.24	2005.39298	2005.386835	0.22736717	-0.6432722	3.5	-4.93	-28.812			38.3		input	Near met. site at Carreg Wen	0	3.5	-4.93	-28.812
70778	CR	Rainfall	2005.05.31 11:40	2005.05.25 11:58	2005	5	31	11:40	2005.05.31	2005.412291	2005.395888	0.05615764	-1.2505912						9.5		input	Near met. site at Carreg Wen
70789	CR	Rainfall	2005.06.07 12:21	2005.06.02 23:01	2005	6	7	12:21	2005.06.07	2005.431547	2005.419067	0.27151467	-0.5662067	1.3					45.8		input	Near met. site at Carreg Wen	0.16666	1.3	0.681	-21.9
70801	CR	Rainfall	2005.06.14 09:25	2005.06.10 22:53	2005	6	14	09:25	2005.06.14	2005.45039	2005.440968	0.00302908	-2.5186894						0.5		input	Near met. site at Carreg Wen
70811	CR	Rainfall	2005.06.21 10:40	2005.06.16 15:05	2005	6	21	10:40	2005.06.21	2005.469711	2005.456518	0.22451994	-0.6487451	0.9					38		input	Near met. site at Carreg Wen	0	0.9	-0.273	-8.111
70823	CR	Rainfall	2005.06.28 09:07	2005.06.24 10:54	2005	6	28	09:07	2005.06.28	2005.488712	2005.477957	0.06608591	-1.1798911		-6.127	-46.623			11		input	Near met. site at Carreg Wen	0		-6.127	-46.623
70835	CR	Rainfall	2005.07.05 07:59	2005.06.30 22:09	2005	7	5	07:59	2005.07.05	2005.507761	2005.49568	0.28765481	-0.5411284	1.4	-4.251	-25.943			48		input	Near met. site at Carreg Wen	0	1.4	-4.251	-25.943
70847	CR	Rainfall	2005.07.12 09:38	2005.07.05 15:10	2005	7	12	09:38	2005.07.12	2005.527127	2005.508581	0.09431182	-1.0254339	1.1					16		input	Near met. site at Carreg Wen	0.16666	1.1	0.313	-17.859
70859	CR	Rainfall	2005.07.19 09:49	2005.07.17 18:08	2005	7	19	09:49	2005.07.19	2005.546326	2005.541796	0.03270241	-1.4854203						5.5		input	Near met. site at Carreg Wen
70871	CR	Rainfall	2005.07.26 09:42	2005.07.24 11:12	2005	7	26	09:42	2005.07.26	2005.565491	2005.560185	0.19954333	-0.6999628	0.7	-8.725	-62.481			33.5		input	Near met. site at Carreg Wen	0	0.7	-8.725	-62.481
70883	CR	Rainfall	2005.08.02 11:45	2005.07.29 05:19	2005	8	2	11:45	2005.08.02	2005.584903	2005.573211	0.20876213	-0.6803483	0.6	-6.519	-44.268			35.5		input	Near met. site at Carreg Wen	0	0.6	-6.519	-44.268
70895	CR	Rainfall	2005.08.09 12:00	2005.08.04 06:20	2005	8	9	12:00	2005.08.09	2005.60411	2005.589765	0.1961367	-0.7074411	0.6	-2.009	-18.981			33		input	Near met. site at Carreg Wen	0	0.6	-2.009	-18.981
70907	CR	Rainfall	2005.08.16 13:09	2005.08.13 11:30	2005	8	16	13:09	2005.08.16	2005.623419	2005.615011	0.11232634	-0.9495184	1.3	-5.004	-32.847			19		input	Near met. site at Carreg Wen	0	1.3	-5.004	-32.847
70919	CR	Rainfall	2005.08.23 10:05	2005.08.21 23:10	2005	8	23	10:05	2005.08.23	2005.642247	2005.638262	0.06669361	-1.1759158		-4.854	-32.13			11		input	Near met. site at Carreg Wen	0		-4.854	-32.13
70931	CR	Rainfall	2005.08.30 12:00	2005.08.25 21:39	2005	8	30	12:00	2005.08.30	2005.661644	2005.649047	0.22363904	-0.6504524	3	-3.64	-16.505			38		input	Near met. site at Carreg Wen	0	3	-3.64	-16.505
70943	CR	Rainfall	2005.09.06 11:17	2005.09.02 12:55	2005	9	6	11:17	2005.09.06	2005.68074	2005.669968	0.03885623	-1.4105393		-1.797	-7.771			6.5		input	Near met. site at Carreg Wen	0		-1.797	-7.771
70955	CR	Rainfall	2005.09.13 11:00	2005.09.08 17:37	2005	9	13	11:00	2005.09.13	2005.699886	2005.686943	0.14906092	-0.8266362		-2.464	-18.342			25		input	Near met. site at Carreg Wen	0		-2.464	-18.342
70967	CR	Rainfall	2005.09.20 11:14	2005.09.15 11:57	2005	9	20	11:14	2005.09.20	2005.719091	2005.705474	0.21696057	-0.6636192	0.5	-1.497	-10.143			36.5		input	Near met. site at Carreg Wen	0	0.5	-1.497	-10.143
70979	CR	Rainfall	2005.09.27 11:27	2005.09.25 12:21	2005	9	27	11:27	2005.09.27	2005.738293	2005.732918	0.19914792	-0.7008242	3.7	-3.068	-13.448			33.5		input	Near met. site at Carreg Wen	0	3.7	-3.068	-13.448
70991	CR	Rainfall	2005.10.04 09:57	2005.09.29 21:43	2005	10	4	09:57	2005.10.04	2005.7573	2005.744946	0.63063063	-0.2002249	2.8					105		input	Near met. site at Carreg Wen	0.33333	2.8	-0.167	-16.101
71003	CR	Rainfall	2005.10.11 09:41	2005.10.09 00:10	2005	10	11	09:41	2005.10.11	2005.776448	2005.769883	0.09240859	-1.0342877	1.3					15.5		input	Near met. site at Carreg Wen	0.25	1.3	2.193	-4.389
71015	CR	Rainfall	2005.10.18 09:40	2005.10.12 10:51	2005	10	18	09:40	2005.10.18	2005.795624	2005.779321	0.1875186	-0.7269556	0.2	-6.335	-41.438			31.5		input	Near met. site at Carreg Wen	0	0.2	-6.335	-41.438
71027	CR	Rainfall	2005.10.25 10:51	2005.10.22 11:07	2005	10	25	10:51	2005.10.25	2005.814937	2005.806749	0.79499557	-0.0996353	1.2	-7.347	-54.362			134.5		input	Near met. site at Carreg Wen	0	1.2	-7.347	-54.362
71039	CR	Rainfall	2005.11.01 11:05	2005.10.29 02:42	2005	11	1	11:05	2005.11.01	2005.834142	2005.824966	0.27342976	-0.5631542	5.9					46		input	Near met. site at Carreg Wen	0.33333	5.9	-1.14	-22.778
71051	CR	Rainfall	2005.11.08 11:22	2005.11.05 09:43	2005	11	8	11:22	2005.11.08	2005.853352	2005.844946	1.0607111	0.02559711	2.7	-5.407	-37.954			178.5		input	Near met. site at Carreg Wen	0	2.7	-5.407	-37.954
71063	CR	Rainfall	2005.11.15 16:12	2005.11.10 18:57	2005	11	15	16:12	2005.11.15	2005.873082	2005.859699	0.67695275	-0.1694416	3.9	-4.117	-22.753			117		input	Near met. site at Carreg Wen	0	3.9	-4.117	-22.753
71075	CR	Rainfall	2005.11.22 10:41	2005.11.18 11:20	2005	11	22	10:41	2005.11.22	2005.891631	2005.880746	0.01538619	-1.8128688						2.5		input	Near met. site at Carreg Wen
71086	CR	Rainfall	2005.11.29 10:25	2005.11.24 21:36	2005	11	29	10:25	2005.11.29	2005.910778	2005.898357	0.0804849	-1.0942856						13.5		input	Near met. site at Carreg Wen
71097	CR	Rainfall	2005.12.05 13:28	2005.12.03 00:56	2005	12	5	13:28	2005.12.05	2005.927565	2005.920655	0.48962938	-0.3101325						72		input	Near met. site at Carreg Wen	0.16666		-8.729	-61.154
71109	CR	Rainfall	2005.12.12 10:40	2005.12.07 10:39	2005	12	12	10:40	2005.12.12	2005.946423	2005.932723	0.21791768	-0.6617075	4	-12.048	-81.717			36		input	Near met. site at Carreg Wen	0	4	-12.048	-81.717
71121	CR	Rainfall	2005.12.20 11:09	2005.12.17 15:24	2005	12	20	11:09	2005.12.20	2005.968396	2005.960663	0.16884579	-0.7725098	3.8					32.5		input	Near met. site at Carreg Wen	0.66666	3.8	6.185	3.286
71133	CR	Rainfall	2006.01.03 12:51	2005.12.28 02:58	2006	1	3	12:51	2006.01.03	2006.006946	2005.98938	0.3612674	-0.4421712	3.8					122		input	Near met. site at Carreg Wen	0.125	3.8	-5.057	-32.869
71145	CR	Rainfall	2006.01.10 10:35	2006.01.09 21:50	2006	1	10	10:35	2006.01.10	2006.025866	2006.024411	0.12972647	-0.8869714	0.4	-6.573	-42.222			21.5		input	Near met. site at Carreg Wen	0	0.4	-6.573	-42.222
71157	CR	Rainfall	2006.01.17 11:15	2006.01.13 02:18	2006	1	17	11:15	2006.01.17	2006.04512	2006.03314	0.37055336	-0.4311492	1.9					62.5		input	Near met. site at Carreg Wen	0.33333	1.9	-0.362	-20.525
71169	CR	Rainfall	2006.01.24 10:20	2006.01.19 05:29	2006	1	24	10:20	2006.01.24	2006.064193	2006.049942	0.1915212	-0.7177832	1.7	-3.253	-17.56			32		input	Near met. site at Carreg Wen	0	1.7	-3.253	-17.56
71181	CR	Rainfall	2006.01.31 11:44	2006.01.28 11:30	2006	1	31	11:44	2006.01.31	2006.083531	2006.075285	0.00590319	-2.2289134						1		input	Near met. site at Carreg Wen
71191	CR	Rainfall	2006.02.07 11:00	2006.02.03 12:00	2006	2	7	11:00	2006.02.07	2006.102626	2006.091781	0.00149462	-2.8254694						0.25		input	Near met. site at Carreg Wen
71202	CR	Rainfall	2006.02.14 13:46	2006.02.11 03:13	2006	2	14	13:46	2006.02.14	2006.12212	2006.112697	0.36014054	-0.443528	2.8	-5.757	-36.268			61.5		input	Near met. site at Carreg Wen	0	2.8	-5.757	-36.268
71214	CR	Rainfall	2006.02.21 09:47	2006.02.15 21:01	2006	2	21	09:47	2006.02.21	2006.140843	2006.125688	0.30484707	-0.515918	3.3	-10.098	-71.466			50		input	Near met. site at Carreg Wen	0	3.3	-10.098	-71.466
71226	CR	Rainfall	2006.02.28 10:40	2006.02.23 13:45	2006	2	28	10:40	2006.02.28	2006.160122	2006.146775	0.10954308	-0.9604151						18.5		input	Near met. site at Carreg Wen	0.66666		6.465	-9.407
71238	CR	Rainfall	2006.03.07 10:30	2006.02.28 12:30	2006	3	7	10:30	2006.03.07	2006.179281	2006.160331	0.21449851	-0.6685757	3.5					36		input	Near met. site at Carreg Wen		3.5
71250	CR	Rainfall	2006.03.14 10:49	2006.03.10 05:59	2006	3	14	10:49	2006.03.14	2006.198495	2006.186986	0.67729478	-0.1692223	4					114		input	Near met. site at Carreg Wen	0.16666	4	-3.238	-30.818
71261	CR	Rainfall	2006.03.21 10:14	2006.03.16 02:36	2006	3	21	10:14	2006.03.21	2006.217607	2006.203037	0.02687904	-1.5705862						4.5		input	Near met. site at Carreg Wen
71273	CR	Rainfall	2006.03.27 10:25	2006.03.25 20:53	2006	3	27	10:25	2006.03.27	2006.234066	2006.229782	0.59993064	-0.221899	6.3					86.5		input	Near met. site at Carreg Wen	0.125	6.3	-3.518	-37.289
71285	CR	Rainfall	2006.04.04 08:50	2006.03.30 15:32	2006	4	4	08:50	2006.04.04	2006.255803	2006.24287	0.50678337	-0.2951776	7.2	-5.602	-38.396			96.5		input	Near met. site at Carreg Wen	0	7.2	-5.602	-38.396
71297	CR	Rainfall	2006.04.11 10:18	2006.04.10 00:01	2006	4	11	10:18	2006.04.11	2006.275148	2006.271235	0.22128245	-0.655053	2.5	-6.364	-36.882			37.5		input	Near met. site at Carreg Wen	0	2.5	-6.364	-36.882
71309	CR	Rainfall	2006.04.18 10:31	2006.04.12 21:34	2006	4	18	10:31	2006.04.18	2006.294351	2006.279175	0.21846825	-0.6606117	2.9	-3.057	-15.766			36.75		input	Near met. site at Carreg Wen	0	2.9	-3.057	-15.766
71321	CR	Rainfall	2006.04.25 09:53	2006.04.20 18:30	2006	4	25	09:53	2006.04.25	2006.313457	2006.300743	0.24795857	-0.6056209	0.5					41.5		input	Near met. site at Carreg Wen	0.16666	0.5	-2.722	-32.917
71333	CR	Rainfall	2006.05.02 09:39	2006.04.30 20:11	2006	5	2	09:39	2006.05.02	2006.332608	2006.328332	0.07152792	-1.1455244		-8.511	-60.714			12		input	Near met. site at Carreg Wen	0		-8.511	-60.714
71345	CR	Rainfall	2006.05.09 10:18	2006.05.07 11:20	2006	5	9	10:18	2006.05.09	2006.351861	2006.3465	0.19567151	-0.7084724	0.5	-9.213	-65.804			33		input	Near met. site at Carreg Wen	0	0.5	-9.213	-65.804
71357	CR	Rainfall	2006.05.16 09:46	2006.05.13 11:07	2006	5	16	09:46	2006.05.16	2006.370978	2006.362914	0.06568471	-1.1825357	0.8	-4.957	-33.799			11		input	Near met. site at Carreg Wen	0	0.8	-4.957	-33.799
71369	CR	Rainfall	2006.05.23 09:57	2006.05.20 05:57	2006	5	23	09:57	2006.05.23	2006.390177	2006.381503	0.51134674	-0.2912845	3	-7.701	-56.515			86		input	Near met. site at Carreg Wen	0	3	-7.701	-56.515
71381	CR	Rainfall	2006.05.30 08:43	2006.05.25 22:08	2006	5	30	08:43	2006.05.30	2006.409214	2006.397047	0.47971217	-0.3190193	2.5	-5.598	-38.633			80		input	Near met. site at Carreg Wen	0	2.5	-5.598	-38.633
71392	CR	Rainfall	2006.06.06 10:05	2006.06.02 21:24	2006	6	6	10:05	2006.06.06	2006.428548	2006.418881	0.00590435	-2.2288279						1		input	Near met. site at Carreg Wen
71402	CR	Rainfall	2006.06.13 10:19	2006.06.09 22:35	2006	6	13	10:19	2006.06.13	2006.447753	2006.438195	0.01188825	-1.9248821						2		input	Near met. site at Carreg Wen
71414	CR	Rainfall	2006.06.20 09:27	2006.06.18 14:31	2006	6	20	09:27	2006.06.20	2006.466832	2006.461932	0.05384922	-1.2688206	1.1	-2.929	-21.284			9		input	Near met. site at Carreg Wen	0	1.1	-2.929	-21.284
71426	CR	Rainfall	2006.06.27 09:06	2006.06.22 12:44	2006	6	27	09:06	2006.06.27	2006.48597	2006.472687	0.09991053	-1.0003887		-3.58	-19.523			16.75		input	Near met. site at Carreg Wen	0		-3.58	-19.523
71438	CR	Rainfall	2006.07.04 10:11	2006.06.27 15:26	2006	7	4	10:11	2006.07.04	2006.505272	2006.486693	0.04287827	-1.3677628	1.2					7.25		input	Near met. site at Carreg Wen		1.2
71449	CR	Rainfall	2006.07.11 12:10	2006.07.08 07:48	2006	7	11	12:10	2006.07.11	2006.524677	2006.515961	0.16472203	-0.7832483		-2.722	-24.478			28		input	Near met. site at Carreg Wen	0		-2.722	-24.478
71461	CR	Rainfall	2006.07.18 10:26	2006.07.12 20:10	2006	7	18	10:26	2006.07.18	2006.543657	2006.52833	0.16840417	-0.7736472						28		input	Near met. site at Carreg Wen
71471	CR	Rainfall	2006.07.25 09:53	2006.07.21 21:42	2006	7	25	09:53	2006.07.25	2006.562772	2006.553162	0.00597193	-2.2238852	2.7					1		input	Near met. site at Carreg Wen		2.7
71481	CR	Rainfall	2006.08.01 09:36	2006.07.30 22:21	2006	8	1	09:36	2006.08.01	2006.581918	2006.577895	0.01043426	-1.9815382		-3.483	-26.016			1.75		input	Near met. site at Carreg Wen	0		-3.483	-26.016
71493	CR	Rainfall	2006.08.08 09:15	2006.08.05 04:54	2006	8	8	09:15	2006.08.08	2006.601056	2006.592342	0.14613779	-0.8352375						24.5		input	Near met. site at Carreg Wen
71504	CR	Rainfall	2006.08.15 09:45	2006.08.10 16:00	2006	8	15	09:45	2006.08.15	2006.620291	2006.607306	0.02967359	-1.5276299	0.4					5		input	Near met. site at Carreg Wen		0.4
71513	CR	Rainfall	2006.08.22 09:17	2006.08.19 07:20	2006	8	22	09:17	2006.08.22	2006.639416	2006.630976	0.02387585	-1.6220412	1.4	-8.112	-54.69			4		input	Near met. site at Carreg Wen	0	1.4	-8.112	-54.69
71524	CR	Rainfall	2006.08.29 09:11	2006.08.26 01:47	2006	8	29	09:11	2006.08.29	2006.658583	2006.649519	0.52114354	-0.2830426	1.2	-5.139	-32.021			87.5		input	Near met. site at Carreg Wen	0	1.2	-5.139	-32.021
71533	CR	Rainfall	2006.09.05 12:46	2006.09.01 11:43	2006	9	5	12:46	2006.09.05	2006.67817	2006.667093	0.19524041	-0.7094303		-2.86	-13.351			33.5		input	Near met. site at Carreg Wen	0		-2.86	-13.351
71544	CR	Rainfall	2006.09.12 11:06	2006.09.06 21:10	2006	9	12	11:06	2006.09.12	2006.697158	2006.681868	0.03607214	-1.442828						6		input	Near met. site at Carreg Wen
71553	CR	Rainfall	2006.09.19 09:42	2006.09.16 15:22	2006	9	19	09:42	2006.09.19	2006.716176	2006.708604	0.09903962	-1.0041911	2.5	-5.005	-28.048			16.5		input	Near met. site at Carreg Wen	0	2.5	-5.005	-28.048
71564	CR	Rainfall	2006.09.26 12:37	2006.09.23 16:20	2006	9	26	12:37	2006.09.26	2006.735687	2006.727892	0.05558264	-1.2550608		-6.478	-37.893			9.5		input	Near met. site at Carreg Wen	0		-6.478	-37.893
71573	CR	Rainfall	2006.10.03 09:48	2006.09.30 11:37	2006	10	3	09:48	2006.10.03	2006.754543	2006.746532	0.51609323	-0.2872718	2	-6.687	-43.91			85.25		input	Near met. site at Carreg Wen	0	2	-6.687	-43.91
71584	CR	Rainfall	2006.10.10 12:09	2006.10.05 19:11	2006	10	10	12:09	2006.10.10	2006.77399	2006.761095	0.64572938	-0.1899495	2.4	-4.66	-26.673			110	Rain not recorded. No cylinder; calculated from AWS	input	Near met. site at Carreg Wen	0	2.4	-4.66	-26.673
71593	CR	Rainfall	2006.10.17 09:32	2006.10.11 16:11	2006	10	17	09:32	2006.10.17	2006.792869	2006.777191	0.71954046	-0.1429448	2.3	-7.201	-47.04			119		input	Near met. site at Carreg Wen	0	2.3	-7.201	-47.04
71604	CR	Rainfall	2006.10.24 09:13	2006.10.20 13:49	2006	10	24	09:13	2006.10.24	2006.812011	2006.801579	0.46516251	-0.3323953	2.2	-7.49	-46.674			78		input	Near met. site at Carreg Wen	0	2.2	-7.49	-46.674
71613	CR	Rainfall	2006.10.31 10:30	2006.10.27 17:39	2006	10	31	10:30	2006.10.31	2006.831336	2006.821194	0.34852811	-0.4577622	3.7	-5.022	-29.071			59		input	Near met. site at Carreg Wen	0	3.7	-5.022	-29.071
71624	CR	Rainfall	2006.11.08 14:20	2006.11.08 01:19	2006	11	8	14:20	2006.11.08	2006.853691	2006.852207	0.07148936	-1.1457586	2.9	-4.461	-25.219			14		input	Near met. site at Carreg Wen	0	2.9	-4.461	-25.219
71633	CR	Rainfall	2006.11.14 10:36	2006.11.11 16:10	2006	11	14	10:36	2006.11.14	2006.869703	2006.862121	0.47409696	-0.3241328	2.2	-5.341	-31.554			66.5		input	Near met. site at Carreg Wen	0	2.2	-5.341	-31.554
71644	CR	Rainfall	2006.11.21 10:37	2006.11.17 16:43	2006	11	21	10:37	2006.11.21	2006.888883	2006.878621	0.69933538	-0.1553145	4.4	-6.654	-37.123			117.5		input	Near met. site at Carreg Wen	0	4.4	-6.654	-37.123
71653	CR	Rainfall	2006.11.28 10:30	2006.11.24 16:13	2006	11	28	10:30	2006.11.28	2006.908048	2006.897742	0.56884741	-0.2450042	5.4	-8.125	-52.069			95.5		input	Near met. site at Carreg Wen	0	5.4	-8.125	-52.069
71664	CR	Rainfall	2006.12.05 14:08	2006.12.03 21:38	2006	12	5	14:08	2006.12.05	2006.927641	2006.923018	0.65255389	-0.1853836	10.3	-6.006	-36.674			112		input	Near met. site at Carreg Wen	0	10.3	-6.006	-36.674
71673	CR	Rainfall	2006.12.12 10:35	2006.12.09 07:48	2006	12	12	10:35	2006.12.12	2006.946414	2006.937877	1.3347522	0.12540065	15.8	-6.149	-35.974			219.5		input	Near met. site at Carreg Wen	0	15.8	-6.149	-35.974
71684	CR	Rainfall	2006.12.19 10:42	2006.12.14 20:17	2006	12	19	10:42	2006.12.19	2006.965605	2006.953001	0.58292852	-0.2343847	3	-3.797	-17.427			98		input	Near met. site at Carreg Wen	0	3	-3.797	-17.427
71693	CR	Rainfall	2007.01.02 11:06	2006.12.30 08:19	2007	1	2	11:06	2007.01.02	2007.004007	2006.995471	0.65249703	-0.1854215	6	-6.907	-40.306			219.5		input	Near met. site at Carreg Wen	0	6	-6.907	-40.306
71704	CR	Rainfall	2007.01.09 11:00	2007.01.07 01:50	2007	1	9	11:00	2007.01.09	2007.023174	2007.016649	0.94699226	-0.0236536	3.7	-5.545	-34.378			159		input	Near met. site at Carreg Wen	0	3.7	-5.545	-34.378
71715	CR	Rainfall	2007.01.16 13:24	2007.01.11 21:18	2007	1	16	13:24	2007.01.16	2007.042626	2007.02983	0.7306338	-0.1363002	5.6	-4.849	-27.018			124.5		input	Near met. site at Carreg Wen	0	5.6	-4.849	-27.018
71724	CR	Rainfall	2007.01.23 13:32	2007.01.18 22:54	2007	1	23	13:32	2007.01.23	2007.061819	2007.049191	0.8148295	-0.0889333	8.8	-6.971	-42.88			137		input	Near met. site at Carreg Wen	0	8.8	-6.971	-42.88
71735	CR	Rainfall	2007.01.31 10:48	2007.01.26 16:42	2007	1	31	10:48	2007.01.31	2007.083425	2007.0704	0.02377598	-1.6238616		-3.758	-15.005			4.5		input	Near met. site at Carreg Wen	0		-3.758	-15.005
71744	CR	Rainfall	2007.02.06 10:47	2007.02.01 16:42	2007	2	6	10:47	2007.02.06	2007.099861	2007.086838	0.01041787	-1.982221						1.5		input	Near met. site at Carreg Wen
71755	CR	Rainfall	2007.02.13 13:54	2007.02.11 21:36	2007	2	13	13:54	2007.02.13	2007.119395	2007.114796	0.59608454	-0.2246921	4	-8.574	-55.173			102		input	Near met. site at Carreg Wen	0	4	-8.574	-55.173
71764	CR	Rainfall	2007.02.21 10:49	2007.02.17 00:45	2007	2	21	10:49	2007.02.21	2007.140961	2007.128853	0.20644023	-0.6852057	1.1	-9.716	-67.031			39		input	Near met. site at Carreg Wen	0	1.1	-9.716	-67.031
71775	CR	Rainfall	2007.02.27 13:47	2007.02.25 02:31	2007	2	27	13:47	2007.02.27	2007.157738	2007.150972	0.5205262	-0.2835574	1.6	-7.171	-49.03			76.5		input	Near met. site at Carreg Wen	0	1.6	-7.171	-49.03
71784	CR	Rainfall	2007.03.06 12:56	2007.03.04 11:36	2007	3	6	12:56	2007.03.06	2007.176819	2007.171188	0.59527371	-0.2252833	6.7	-10.763	-76.854			99.5		input	Near met. site at Carreg Wen	0	6.7	-10.763	-76.854
71795	CR	Rainfall	2007.03.13 12:38	2007.03.08 22:56	2007	3	13	12:38	2007.03.13	2007.195963	2007.18344	0.13118664	-0.8821104	5.1	-6.791	-46.965			22		input	Near met. site at Carreg Wen	0	5.1	-6.791	-46.965
71804	CR	Rainfall	2007.03.20 10:50	2007.03.17 12:37	2007	3	20	10:50	2007.03.20	2007.214935	2007.206922	0.27978339	-0.5531781	5.3	-4.11	-23.432			46.5		input	Near met. site at Carreg Wen	0	5.3	-4.11	-23.432
71815	CR	Rainfall	2007.03.27 12:55	2007.03.21 22:45	2007	3	27	12:55	2007.03.27	2007.234351	2007.219035	0.02645762	-1.5774492						4.5		input	Near met. site at Carreg Wen	0.33333		-7.089	-49.591
71824	CR	Rainfall	2007.04.03 09:33	2007.03.29 15:30	2007	4	3	09:33	2007.04.03	2007.253145	2007.240126	0.02125936	-1.6724497						3.5		input	Near met. site at Carreg Wen
71835	CR	Rainfall	2007.04.10 13:43	2007.04.06 23:38	2007	4	10	13:43	2007.04.10	2007.272799	2007.262972	0.00580833	-2.2359491						1		input	Near met. site at Carreg Wen
71844	CR	Rainfall	2007.04.17 09:40	2007.04.13 23:41	2007	4	17	09:40	2007.04.17	2007.291515	2007.282157	0.00152486	-2.8167714						0.25		input	Near met. site at Carreg Wen
71855	CR	Rainfall	2007.04.24 12:30	2007.04.23 16:42	2007	4	24	12:30	2007.04.24	2007.311016	2007.308757	0.23414634	-0.6305126	0.2	-6.806	-49.01			40		input	Near met. site at Carreg Wen	0	0.2	-6.806	-49.01
71864	CR	Rainfall	2007.05.01 09:50	2007.04.24 23:06	2007	5	1	09:50	2007.05.01	2007.32989	2007.312226	0.01512097	-1.8204204		-3.871	-27.052			2.5		input	Near met. site at Carreg Wen	0		-3.871	-27.052
71875	CR	Rainfall	2007.05.08 11:48	2007.05.07 11:46	2007	5	8	11:48	2007.05.08	2007.349292	2007.346549	0.17356344	-0.7605417	3.4	-4.06	-22.168			29.5		input	Near met. site at Carreg Wen	0	3.4	-4.06	-22.168
71884	CR	Rainfall	2007.05.15 15:55	2007.05.11 21:50	2007	5	15	15:55	2007.05.15	2007.36894	2007.358657	0.48513605	-0.3141365	1.5	-9.507	-67.525			83.5		input	Near met. site at Carreg Wen	0	1.5	-9.507	-67.525
71895	CR	Rainfall	2007.05.22 11:10	2007.05.17 10:32	2007	5	22	11:10	2007.05.22	2007.387576	2007.373807	0.27258806	-0.5644932	4.1	-4.344	-28.51			44.5		input	Near met. site at Carreg Wen	0	4.1	-4.344	-28.51
71904	CR	Rainfall	2007.05.29 09:42	2007.05.26 21:38	2007	5	29	09:42	2007.05.29	2007.406587	2007.39973	0.05254203	-1.2794931						8.75		input	Near met. site at Carreg Wen
71915	CR	Rainfall	2007.06.05 12:04	2007.05.30 20:04	2007	6	5	12:04	2007.06.05	2007.426035	2007.41051	0.06456662	-1.1899919	1.7	-5.619	-34.566			11		input	Near met. site at Carreg Wen	0	1.7	-5.619	-34.566
71924	CR	Rainfall	2007.06.12 10:19	2007.06.11 03:12	2007	6	12	10:19	2007.06.12	2007.445013	2007.441462	0.05714286	-1.243038						9.5		input	Near met. site at Carreg Wen
71935	CR	Rainfall	2007.06.19 10:48	2007.06.15 16:00	2007	6	19	10:48	2007.06.19	2007.464247	2007.453883	0.26412108	-0.5781969	0.4	-8.415	-60.281			44.5		input	Near met. site at Carreg Wen	0	0.4	-8.415	-60.281
71944	CR	Rainfall	2007.06.26 09:41	2007.06.24 01:30	2007	6	26	09:41	2007.06.26	2007.483297	2007.476884	0.41945471	-0.3773149	0.9	-10.706	-77.893			70		input	Near met. site at Carreg Wen	0	0.9	-10.706	-77.893
71955	CR	Rainfall	2007.07.03 09:55	2007.06.30 11:34	2007	7	3	09:55	2007.07.03	2007.502502	2007.494472	0.60927284	-0.2151882	1.8	-5.21	-35.062			102.5		input	Near met. site at Carreg Wen	0	1.8	-5.21	-35.062
71964	CR	Rainfall	2007.07.10 09:42	2007.07.06 00:26	2007	7	10	09:42	2007.07.10	2007.521655	2007.50964	0.59302672	-0.2269257	4	-6.718	-46.245			99.5		input	Near met. site at Carreg Wen	0	4	-6.718	-46.245
71975	CR	Rainfall	2007.07.17 12:30	2007.07.13 18:09	2007	7	17	12:30	2007.07.17	2007.541153	2007.530841	0.25468384	-0.5939986	0.69	-7.175	-52.053			43.5		input	Near met. site at Carreg Wen	0	0.69	-7.175	-52.053
71984	CR	Rainfall	2007.07.24 09:50	2007.07.20 11:43	2007	7	24	09:50	2007.07.24	2007.560027	2007.549284	0.54435484	-0.2641179	0.37	-10.53	-75.963			90		input	Near met. site at Carreg Wen	0	0.37	-10.53	-75.963
71995	CR	Rainfall	2007.07.31 10:14	2007.07.26 07:13	2007	7	31	10:14	2007.07.31	2007.57925	2007.565209	0.29394299	-0.5317369	1.39	-6.478	-43.775			49.5		input	Near met. site at Carreg Wen	0	1.39	-6.478	-43.775
72004	CR	Rainfall	2007.08.07 09:40	2007.08.05 03:42	2007	8	7	09:40	2007.08.07	2007.598364	2007.592205	0.06271153	-1.2026526		-6.002	-38.219			10.5		input	Near met. site at Carreg Wen	0		-6.002	-38.219
72015	CR	Rainfall	2007.08.14 09:50	2007.08.13 00:58	2007	8	14	09:50	2007.08.14	2007.617561	2007.61381	0.15460852	-0.8107666	1.73	-7.685	-52.625			26		input	Near met. site at Carreg Wen	0	1.73	-7.685	-52.625
72024	CR	Rainfall	2007.08.21 11:54	2007.08.17 00:42	2007	8	21	11:54	2007.08.21	2007.636975	2007.624739	0.19110153	-0.7187358	2.13	-5.795	-36.682			32.5		input	Near met. site at Carreg Wen	0	2.13	-5.795	-36.682
72035	CR	Rainfall	2007.08.28 10:42	2007.08.24 23:18	2007	8	28	10:42	2007.08.28	2007.656016	2007.646495	0.0059952	-2.222196						1		input	Near met. site at Carreg Wen
72044	CR	Rainfall	2007.09.04 09:37	2007.09.02 05:03	2007	9	4	09:37	2007.09.04	2007.67507	2007.66907	0.13030454	-0.8850404	2.26	-2.347	-9.254			21.75		input	Near met. site at Carreg Wen	0	2.26	-2.347	-9.254
72055	CR	Rainfall	2007.09.11 12:37	2007.09.08 01:10	2007	9	11	12:37	2007.09.11	2007.694591	2007.685065	0.00877193	-2.0569049						1.5		input	Near met. site at Carreg Wen
72064	CR	Rainfall	2007.09.18 10:41	2007.09.15 23:57	2007	9	18	10:41	2007.09.18	2007.713548	2007.706845	0.11140104	-0.9531107	2.88	-3.625	-15.167			18.5		input	Near met. site at Carreg Wen	0	2.88	-3.625	-15.167
72075	CR	Rainfall	2007.09.25 12:40	2007.09.21 17:59	2007	9	25	12:40	2007.09.25	2007.732953	2007.722602	1.12363957	0.05062703	3.08	-4.626	-21.925			191		input	Near met. site at Carreg Wen	0	3.08	-4.626	-21.925
72084	CR	Rainfall	2007.10.02 09:48	2007.09.28 08:47	2007	10	2	09:48	2007.10.02	2007.751804	2007.74073	0.04238999	-1.3727367						7		input	Near met. site at Carreg Wen
72095	CR	Rainfall	2007.10.09 09:28	2007.10.07 12:42	2007	10	9	09:28	2007.10.09	2007.770944	2007.765835	0.15805169	-0.8012009	1.61	-4.375	-21.545			26.5		input	Near met. site at Carreg Wen	0	1.61	-4.375	-21.545
72104	CR	Rainfall	2007.10.16 09:41	2007.10.13 06:53	2007	10	16	09:41	2007.10.16	2007.790147	2007.781608	0.16050728	-0.7945053	2.68					27		input	Near met. site at Carreg Wen		2.68
72115	CR	Rainfall	2007.10.23 09:34	2007.10.16 19:33	2007	10	23	09:34	2007.10.23	2007.809311	2007.791274	0.04914127	-1.3085536		-7.749	-53.701			8.25		input	Near met. site at Carreg Wen	0		-7.749	-53.701
72124	CR	Rainfall	2007.10.30 11:03	2007.10.28 03:30	2007	10	30	11:03	2007.10.30	2007.828659	2007.822319	0.32746583	-0.484834	2.17	-4.474	-22.067			55.5		input	Near met. site at Carreg Wen	0	2.17	-4.474	-22.067
72135	CR	Rainfall	2007.11.06 14:20	2007.11.04 17:10	2007	11	6	14:20	2007.11.06	2007.848212	2007.843056	0.03211054	-1.4933524		-3.421	-13.115			5.5		input	Near met. site at Carreg Wen	0		-3.421	-13.115
72144	CR	Rainfall	2007.11.13 10:52	2007.11.10 06:34	2007	11	13	10:52	2007.11.13	2007.866994	2007.858284	0.20968395	-0.6784348	12	-3.412	-13.065			34.5		input	Near met. site at Carreg Wen	0	12	-3.412	-13.065
72155	CR	Rainfall	2007.11.20 10:36	2007.11.17 17:45	2007	11	20	10:36	2007.11.20	2007.886142	2007.87874	0.12519873	-0.9024001	5.11	-11.572	-78.241			21		input	Near met. site at Carreg Wen	0	5.11	-11.572	-78.241
72164	CR	Rainfall	2007.11.27 10:50	2007.11.24 03:26	2007	11	27	10:50	2007.11.27	2007.905346	2007.896284	0.15157519	-0.8193719	3.86	-6.576	-34.388			25.5		input	Near met. site at Carreg Wen	0	3.86	-6.576	-34.388
72175	CR	Rainfall	2007.12.04 13:18	2007.12.01 05:22	2007	12	4	13:18	2007.12.04	2007.924806	2007.915681	0.79780993	-0.0981006	6.82	-7.367	-42.194			136		input	Near met. site at Carreg Wen	0	6.82	-7.367	-42.194
72184	CR	Rainfall	2007.12.11 11:05	2007.12.06 18:57	2007	12	11	11:05	2007.12.11	2007.943731	2007.930931	1.1249623	0.05113797	5.23	-6.322	-40.092			186.5		input	Near met. site at Carreg Wen	0	5.23	-6.322	-40.092
72195	CR	Rainfall	2007.12.18 11:23	2007.12.13 21:00	2007	12	18	11:23	2007.12.18	2007.962943	2007.950343	0.00594177	-2.2260841						1		input	Near met. site at Carreg Wen
72204	CR	Rainfall	2008.01.02 12:25	2007.12.27 00:29	2008	1	2	12:25	2008.01.02	2008.004146	2007.986358	0.2936017	-0.5322414	4.51	-6.328	-36.775			106		input	Near met. site at Carreg Wen	0	4.51	-6.328	-36.775
72213	CR	Rainfall	2008.01.08 10:55	2008.01.06 20:58	2008	1	8	10:55	2008.01.08	2008.020369	2008.01605	0.31929825	-0.4958035	15.5	-7.23	-39.068			45.5		input	Near met. site at Carreg Wen	0	15.5	-7.23	-39.068
72224	CR	Rainfall	2008.01.15 15:14	2008.01.12 09:26	2008	1	15	15:14	2008.01.15	2008.039986	2008.03113	0.79504788	-0.0996067	4.18	-9.516	-63.072			137		input	Near met. site at Carreg Wen	0	4.18	-9.516	-63.072
72233	CR	Rainfall	2008.01.22 10:27	2008.01.19 12:16	2008	1	22	10:27	2008.01.22	2008.058567	2008.050578	1.62054529	0.20966117	3.12	-3.724	-20.903			264.5		input	Near met. site at Carreg Wen	0	3.12	-3.724	-20.903
72244	CR	Rainfall	2008.01.29 13:10	2008.01.23 22:34	2008	1	29	13:10	2008.01.29	2008.078002	2008.06268	0.18451626	-0.7339654	7.33	-2.659	-9.958			31.5		input	Near met. site at Carreg Wen	0	7.33	-2.659	-9.958
72253	CR	Rainfall	2008.02.05 11:23	2008.02.01 19:25	2008	2	5	11:23	2008.02.05	2008.096924	2008.086911	0.40008022	-0.3978529	16.1	-6.66	-34.938			66.5		input	Near met. site at Carreg Wen	0	16.1	-6.66	-34.938
72264	CR	Rainfall	2008.02.12 12:59	2008.02.06 18:04	2008	2	12	12:59	2008.02.12	2008.116232	2008.100418	0.07959906	-1.0990921	9.72	-6.672	-38.313			13.5		input	Near met. site at Carreg Wen	0	9.72	-6.672	-38.313
72273	CR	Rainfall	2008.02.19 10:16	2008.02.14 09:30	2008	2	19	10:16	2008.02.19	2008.135049	2008.1213	0.00605022	-2.2182291						1		input	Near met. site at Carreg Wen
72284	CR	Rainfall	2008.02.26 13:04	2008.02.24 03:22	2008	2	26	13:04	2008.02.26	2008.154493	2008.147925	0.36299766	-0.4400962	3.3	-6.055	-38.999			62		input	Near met. site at Carreg Wen	0	3.3	-6.055	-38.999
72293	CR	Rainfall	2008.03.04 11:25	2008.03.01 07:40	2008	3	4	11:25	2008.03.04	2008.173431	2008.164809	0.44484521	-0.3517911	10.5	-4.487	-26.007			74		input	Near met. site at Carreg Wen	0	10.5	-4.487	-26.007
72304	CR	Rainfall	2008.03.11 13:53	2008.03.09 04:33	2008	3	11	13:53	2008.03.11	2008.192837	2008.186312	0.55142745	-0.2585116	5.84	-7.189	-41.831			94		input	Near met. site at Carreg Wen	0	5.84	-7.189	-41.831
72313	CR	Rainfall	2008.03.18 11:10	2008.03.15 09:34	2008	3	18	11:10	2008.03.18	2008.211654	2008.203276	0.28133508	-0.5507761	6.23	-8.244	-52.237			46.5		input	Near met. site at Carreg Wen	0	6.23	-8.244	-52.237
72324	CR	Rainfall	2008.03.25 14:00	2008.03.21 15:32	2008	3	25	14:00	2008.03.25	2008.231102	2008.220349	0.29853659	-0.5250024	6.17	-3.942	-16.936			51		input	Near met. site at Carreg Wen	0	6.17	-3.942	-16.936
72333	CR	Rainfall	2008.04.01 09:55	2008.03.29 04:36	2008	4	1	09:55	2008.04.01	2008.249763	2008.240961	0.44839858	-0.3483358	5.49	-7.413	-45.307			73.5		input	Near met. site at Carreg Wen	0	5.49	-7.413	-45.307
72344	CR	Rainfall	2008.04.08 12:28	2008.04.05 06:50	2008	4	8	12:28	2008.04.08	2008.269179	2008.260342	0.07915567	-1.101518	7.31	-3.379	-13.144			13.5		input	Near met. site at Carreg Wen	0	7.31	-3.379	-13.144
72353	CR	Rainfall	2008.04.15 10:00	2008.04.11 22:46	2008	4	15	10:00	2008.04.15	2008.288024	2008.278548	0.25674587	-0.5904965	4.16	-8.519	-51.997			42.5		input	Near met. site at Carreg Wen	0	4.16	-8.519	-51.997
72364	CR	Rainfall	2008.04.22 10:07	2008.04.19 08:43	2008	4	22	10:07	2008.04.22	2008.307163	2008.298808	0.03866363	-1.4126974						6.5		input	Near met. site at Carreg Wen
72373	CR	Rainfall	2008.04.29 09:15	2008.04.26 10:23	2008	4	29	09:15	2008.04.29	2008.32619	2008.318123	0.32309533	-0.4906693	1.57	-7.339	-46.82			54		input	Near met. site at Carreg Wen	0	1.57	-7.339	-46.82
72384	CR	Rainfall	2008.05.06 14:52	2008.04.30 05:05	2008	5	6	14:52	2008.05.06	2008.345955	2008.328448	0.16415475	-0.7847466	1.88	-11.865	-82.817			28.5		input	Near met. site at Carreg Wen	0	1.88	-11.865	-82.817
72393	CR	Rainfall	2008.05.13 10:14	2008.05.09 17:30	2008	5	13	10:14	2008.05.13	2008.364553	2008.354451	0.0428484	-1.3680654		-4.057	-25.187			7		input	Near met. site at Carreg Wen	0		-4.057	-25.187
72404	CR	Rainfall	2008.05.20 12:09	2008.05.16 18:11	2008	5	20	12:09	2008.05.20	2008.383897	2008.373656	0.07650809	-1.1162926		-6.306	-38.39			13		input	Near met. site at Carreg Wen	0		-6.306	-38.39
72413	CR	Rainfall	2008.05.27 12:41	2008.05.25 14:17	2008	5	27	12:41	2008.05.27	2008.403083	2008.397801	0.09493671	-1.0225658	0.96	-6.401	-40.946			16		input	Near met. site at Carreg Wen	0	0.96	-6.401	-40.946
72424	CR	Rainfall	2008.06.03 12:38	2008.05.29 16:19	2008	6	3	12:38	2008.06.03	2008.422203	2008.408963	0.07740399	-1.1112367		-8.784	-61.374			13		input	Near met. site at Carreg Wen	0		-8.784	-61.374
72433	CR	Rainfall	2008.06.10 09:45	2008.06.05 14:33	2008	6	10	09:45	2008.06.10	2008.441001	2008.427887	0.04239427	-1.3726929	2.55					7		input	Near met. site at Carreg Wen		2.55
72444	CR	Rainfall	2008.06.17 12:40	2008.06.14 07:08	2008	6	17	12:40	2008.06.17	2008.460458	2008.451633	0.02925402	-1.5338144		-5.31	-27.779			5		input	Near met. site at Carreg Wen	0		-5.31	-27.779
72453	CR	Rainfall	2008.06.24 09:40	2008.06.19 10:01	2008	6	24	09:40	2008.06.24	2008.479243	2008.465623	0.41818182	-0.3786349	3.02	-4.749	-28.33			69		input	Near met. site at Carreg Wen	0	3.02	-4.749	-28.33
72464	CR	Rainfall	2008.07.01 12:37	2008.06.27 00:57	2008	7	1	12:37	2008.07.01	2008.498704	2008.486448	0.49722141	-0.3034502	3.12	-5.822	-36.565			85		input	Near met. site at Carreg Wen	0	3.12	-5.822	-36.565
72473	CR	Rainfall	2008.07.08 09:24	2008.07.05 10:35	2008	7	8	09:24	2008.07.08	2008.517464	2008.509402	0.41873167	-0.3780642	1.39	-6.684	-42.954			69		input	Near met. site at Carreg Wen	0	1.39	-6.684	-42.954
72484	CR	Rainfall	2008.07.15 12:24	2008.07.10 12:21	2008	7	15	12:24	2008.07.15	2008.536931	2008.523266	0.29239766	-0.5340261	2.18	-7.223	-50.187			50		input	Near met. site at Carreg Wen	0	2.18	-7.223	-50.187
72493	CR	Rainfall	2008.07.22 15:37	2008.07.18 01:01	2008	7	22	15:37	2008.07.22	2008.556423	2008.543832	0.19974691	-0.6995199	2.03	-4.991	-28.529			34.2		input	Near met. site at Carreg Wen	0	2.03	-4.991	-28.529
72504	CR	Rainfall	2008.07.29 12:12	2008.07.28 12:32	2008	7	29	12:12	2008.07.29	2008.575159	2008.572467	0.07291139	-1.1372046	1.35	-6.622	-43.889			12		input	Near met. site at Carreg Wen	0	1.35	-6.622	-43.889
72513	CR	Rainfall	2008.08.05 10:40	2008.08.02 14:58	2008	8	5	10:40	2008.08.05	2008.594111	2008.586405	0.3165799	-0.4995167	0.76	-5.363	-32.302			52.7		input	Near met. site at Carreg Wen	0	0.76	-5.363	-32.302
72524	CR	Rainfall	2008.08.12 11:00	2008.08.09 11:05	2008	8	12	11:00	2008.08.12	2008.613274	2008.605088	0.62970297	-0.2008643	2.4	-5.552	-34.865			106		input	Near met. site at Carreg Wen	0	2.4	-5.552	-34.865
72533	CR	Rainfall	2008.08.19 10:10	2008.08.16 02:05	2008	8	19	10:10	2008.08.19	2008.632305	2008.623189	0.84197408	-0.0747013	2.11	-7.085	-45.624			140.75		input	Near met. site at Carreg Wen	0	2.11	-7.085	-45.624
72544	CR	Rainfall	2008.08.26 13:04	2008.08.21 22:58	2008	8	26	13:04	2008.08.26	2008.651761	2008.639228	0.28379169	-0.5470003	2.49	-5.551	-34.308			48.5		input	Near met. site at Carreg Wen	0	2.49	-5.551	-34.308
72553	CR	Rainfall	2008.09.02 09:58	2008.08.29 19:53	2008	9	2	09:58	2008.09.02	2008.670534	2008.660734	0.07034566	-1.1527627	2.69	-3.635	-17.909			11.6		input	Near met. site at Carreg Wen	0	2.69	-3.635	-17.909
72564	CR	Rainfall	2008.09.09 13:14	2008.09.04 19:43	2008	9	9	13:14	2008.09.09	2008.690031	2008.677109	0.8553912	-0.0678352	2.21	-9.575	-65.552			146.5		input	Near met. site at Carreg Wen	0	2.21	-9.575	-65.552
72573	CR	Rainfall	2008.09.16 09:49	2008.09.12 10:22	2008	9	16	09:49	2008.09.16	2008.708768	2008.697902	0.15189873	-0.8184458	2.89	-5.563	-32.902			25		input	Near met. site at Carreg Wen	0	2.89	-5.563	-32.902
72584	CR	Rainfall	2008.09.23 13:30	2008.09.17 18:57	2008	9	23	13:30	2008.09.23	2008.728313	2008.71254	0.0378604	-1.4218148		-5.344	-26.038			6.5		input	Near met. site at Carreg Wen	0		-5.344	-26.038
72593	CR	Rainfall	2008.09.30 09:29	2008.09.30 00:19	2008	9	30	09:29	2008.09.30	2008.746981	2008.745938	0.3003354	-0.5223935	3.22	-7.6	-49.246			49.25		input	Near met. site at Carreg Wen	0	3.22	-7.6	-49.246
72604	CR	Rainfall	2008.10.07 11:37	2008.10.03 20:09	2008	10	7	11:37	2008.10.07	2008.76635	2008.756393	1.17437304	0.06980607	3.36	-7.923	-50.99			199.8		input	Near met. site at Carreg Wen	0	3.36	-7.923	-50.99
72613	CR	Rainfall	2008.10.14 10:08	2008.10.10 23:20	2008	10	14	10:08	2008.10.14	2008.785307	2008.775881	0.33209889	-0.4787326	1.93	-4.11	-20.491			55.3		input	Near met. site at Carreg Wen	0	1.93	-4.11	-20.491
72624	CR	Rainfall	2008.10.21 09:49	2008.10.18 01:41	2008	10	21	09:49	2008.10.21	2008.804396	2008.795275	0.62916211	-0.2012374	2.93	-4.762	-24.702			105.5		input	Near met. site at Carreg Wen	0	2.93	-4.762	-24.702
72633	CR	Rainfall	2008.10.28 11:31	2008.10.25 05:25	2008	10	28	11:31	2008.10.28	2008.823716	2008.814825	0.83971715	-0.075867	2.21	-5.466	-31.006			142.5		input	Near met. site at Carreg Wen	0	2.21	-5.466	-31.006
72644	CR	Rainfall	2008.11.04 11:02	2008.10.30 04:02	2008	11	4	11:02	2008.11.04	2008.842786	2008.828328	0.09252811	-1.0337263		-9.193	-53.932			15.5		input	Near met. site at Carreg Wen	0		-9.193	-53.932
72653	CR	Rainfall	2008.11.11 11:31	2008.11.09 10:00	2008	11	11	11:31	2008.11.11	2008.861967	2008.856331	0.54604808	-0.2627691	7.03	-9.073	-53.289			92		input	Near met. site at Carreg Wen	0	7.03	-9.073	-53.289
72664	CR	Rainfall	2008.11.18 13:30	2008.11.15 18:54	2008	11	18	13:30	2008.11.18	2008.881318	2008.873738	0.57358565	-0.2414017	1.78	-4.257	-23.71			97.5		input	Near met. site at Carreg Wen	0	1.78	-4.257	-23.71
72673	CR	Rainfall	2008.11.25 10:19	2008.11.22 12:27	2008	11	25	10:19	2008.11.25	2008.900082	2008.892128	0.35493983	-0.4498453	5.43	-5.273	-27.294			58.5		input	Near met. site at Carreg Wen	0	5.43	-5.273	-27.294
72684	CR	Rainfall	2008.12.09 11:20	2008.12.02 12:53	2008	12	9	11:20	2008.12.09	2008.938449	2008.9195	0.31897532	-0.4962429	4.8	-8.45	-51.587			107.5		input	Near met. site at Carreg Wen	0	4.8	-8.45	-51.587
72695	CR	Rainfall	2008.12.16 11:10	2008.12.12 22:34	2008	12	16	11:10	2008.12.16	2008.957555	2008.947924	0.19721946	-0.7050502	1.57	-14.821	-108.84			33.1		input	Near met. site at Carreg Wen	0	1.57	-14.821	-108.84
72704	CR	Rainfall	2008.12.23 10:43	2008.12.19 16:43	2008	12	23	10:43	2008.12.23	2008.97663	2008.966384	0.45359594	-0.3433308	4.5	-3.72	-18.877			76		input	Near met. site at Carreg Wen	0	4.5	-3.72	-18.877
72715	CR	Rainfall	2009.01.06 10:55	2008.12.30 10:49	2009	1	6	10:55	2009.01.06	2009.014945	2008.995767	0.00594884	-2.2255677						2		input	Near met. site at Carreg Wen
72726	CR	Rainfall	2009.01.13 11:20	2009.01.12 06:36	2009	1	13	11:20	2009.01.13	2009.034171	2009.030891	0.46313706	-0.3342905	1.25	-6.305	-38.078			78		input	Near met. site at Carreg Wen	0	1.25	-6.305	-38.078
72735	CR	Rainfall	2009.01.20 10:46	2009.01.17 14:15	2009	1	20	10:46	2009.01.20	2009.053284	2009.045464	0.41927135	-0.3775048	10.5	-6.427	-33.461			70.2		input	Near met. site at Carreg Wen	0	10.5	-6.427	-33.461
72746	CR	Rainfall	2009.01.27 13:35	2009.01.23 12:21	2009	1	27	13:35	2009.01.27	2009.072784	2009.061685	0.35710801	-0.4472004	10.5	-10.707	-76.231			61		input	Near met. site at Carreg Wen	0	10.5	-10.707	-76.231
72755	CR	Rainfall	2009.02.03 11:27	2009.01.28 01:10	2009	2	3	11:27	2009.02.03	2009.091718	2009.074108	0.12510048	-0.902741	1.29	-11.242	-83.137			20.75		input	Near met. site at Carreg Wen	0	1.29	-11.242	-83.137
72766	CR	Rainfall	2009.02.10 14:40	2009.02.07 01:03	2009	2	10	14:40	2009.02.10	2009.111263	2009.101491	0.14017327	-0.8533348		-8.232	-53.518			24		input	Near met. site at Carreg Wen	0		-8.232	-53.518
72775	CR	Rainfall	2009.02.17 11:20	2009.02.12 10:54	2009	2	17	11:20	2009.02.17	2009.130061	2009.116315	0.04402834	-1.3562677		-4.642	-24.951			7.25		input	Near met. site at Carreg Wen	0		-4.642	-24.951
72786	CR	Rainfall	2009.02.24 15:45	2009.02.21 10:38	2009	2	24	15:45	2009.02.24	2009.149743	2009.140941	0.01159981	-1.9355492		-5.134	-26.204			2		input	Near met. site at Carreg Wen	0		-5.134	-26.204
72795	CR	Rainfall	2009.03.03 10:29	2009.02.28 04:10	2009	3	3	10:29	2009.03.03	2009.16832	2009.15938	0.08910283	-1.0501085	4.18					14.5		input	Near met. site at Carreg Wen		4.18
72806	CR	Rainfall	2009.03.10 10:35	2009.03.07 17:03	2009	3	10	10:35	2009.03.10	2009.18751	2009.180029	0.47144557	-0.3265684	4.58	-8.343	-53.495			79.25		input	Near met. site at Carreg Wen	0	4.58	-8.343	-53.495
72815	CR	Rainfall	2009.03.17 10:10	2009.03.12 12:51	2009	3	17	10:10	2009.03.17	2009.20664	2009.193249	0.19691696	-0.7057169	2.2	-2.238	-9.219			33		input	Near met. site at Carreg Wen	0	2.2	-2.238	-9.219
70525	TAN	Tanllwyth Bridge	2004.12.21 11:02	2004.12.21 11:02	2004	12	21	11:02	2004.12.21	2004.971201	2004.971201	0.28140088	-0.5506745	7.6	-6.116	-37.095	0.0716	0.07035022			stream	Main Tanllwyth stream channel above borehole T5 upstream of footbridge	0	7.6	-6.116	-37.095
70537	TAN	Tanllwyth Bridge	2005.01.04 12:10	2005.01.04 12:10	2005	1	4	12:10	2005.01.04	2005.009608	2005.009608	0.6897466	-0.1613104	8.4	-5.534	-33.267	0.1755	0.17243665			stream	Main Tanllwyth stream channel above borehole T5 upstream of footbridge	0	8.4	-5.534	-33.267
70549	TAN	Tanllwyth Bridge	2005.01.11 12:10	2005.01.11 12:10	2005	1	11	12:10	2005.01.11	2005.028786	2005.028786	0.30380292	-0.5174081	7.9	-5.421	-32.022	0.0773	0.07595073			stream	Main Tanllwyth stream channel above borehole T5 upstream of footbridge	0	7.9	-5.421	-32.022
70561	TAN	Tanllwyth Bridge	2005.01.18 12:02	2005.01.18 12:02	2005	1	18	12:02	2005.01.18	2005.047949	2005.047949	0.31716552	-0.498714	10			0.0807	0.07929138			stream	Main Tanllwyth stream channel above borehole T5 upstream of footbridge	0.2	10	-1.595	-20.64
70573	TAN	Tanllwyth Bridge	2005.01.25 10:55	2005.01.25 10:55	2005	1	25	10:55	2005.01.25	2005.067	2005.067	0.1395214	-0.8553592	8.7	-5.519	-33.636	0.0355	0.03488035			stream	Main Tanllwyth stream channel above borehole T5 upstream of footbridge	0	8.7	-5.519	-33.636
70585	TAN	Tanllwyth Bridge	2005.02.01 13:10	2005.02.01 13:10	2005	2	1	13:10	2005.02.01	2005.086435	2005.086435	0.07074324	-1.1503151	8.1			0.018	0.01768581			stream	Main Tanllwyth stream channel above borehole T5 upstream of footbridge	0.2	8.1	-0.427	-21.167
70596	TAN	Tanllwyth Bridge	2005.02.08 13:30	2005.02.08 13:30	2005	2	8	13:30	2005.02.08	2005.105651	2005.105651	0.05973872	-1.2237441	7.8	-5.614	-34.433	0.0152	0.01493468			stream	Main Tanllwyth stream channel above borehole T5 upstream of footbridge	0	7.8	-5.614	-34.433
70608	TAN	Tanllwyth Bridge	2005.02.15 16:45	2005.02.15 16:45	2005	2	15	16:45	2005.02.15	2005.1252	2005.1252	0.18078828	-0.7428297	7.8	-5.494	-33.692	0.046	0.04519707			stream	Main Tanllwyth stream channel above borehole T5 upstream of footbridge	0	7.8	-5.494	-33.692
70619	TAN	Tanllwyth Bridge	2005.02.22 11:00	2005.02.22 11:00	2005	2	22	11:00	2005.02.22	2005.143722	2005.143722	0.06720608	-1.1725914	8.1	-5.41	-33.979	0.0171	0.01680152			stream	Main Tanllwyth stream channel above borehole T5 upstream of footbridge	0	8.1	-5.41	-33.979
70630	TAN	Tanllwyth Bridge	2005.03.01 10:55	2005.03.01 10:55	2005	3	1	10:55	2005.03.01	2005.16289	2005.16289	0.21458784	-0.6683949	9.4	-5.728	-36.894	0.0546	0.05364696			stream	Main Tanllwyth stream channel above borehole T5 upstream of footbridge	0	9.4	-5.728	-36.894
70641	TAN	Tanllwyth Bridge	2005.03.08 11:16	2005.03.08 11:16	2005	3	8	11:16	2005.03.08	2005.182108	2005.182108	0.07074324	-1.1503151	7.8			0.018	0.01768581			stream	Main Tanllwyth stream channel above borehole T5 upstream of footbridge	0.33333	7.8	1.835	-16.197
70653	TAN	Tanllwyth Bridge	2005.03.15 11:35	2005.03.15 11:35	2005	3	15	11:35	2005.03.15	2005.201322	2005.201322	0.17292792	-0.7621349	8.9			0.044	0.04323198			stream	Main Tanllwyth stream channel above borehole T5 upstream of footbridge	0	8.9	-4.872	-31.014
70664	TAN	Tanllwyth Bridge	2005.03.22 11:14	2005.03.22 11:14	2005	3	22	11:14	2005.03.22	2005.22046	2005.22046	0.10847296	-0.9646785	8	-5.621	-33.844	0.0276	0.02711824			stream	Main Tanllwyth stream channel above borehole T5 upstream of footbridge	0	8	-5.621	-33.844
70676	TAN	Tanllwyth Bridge	2005.03.29 11:43	2005.03.29 11:43	2005	3	29	11:43	2005.03.29	2005.239694	2005.239694	0.0613108	-1.212463	7.7			0.0156	0.0153277			stream	Main Tanllwyth stream channel above borehole T5 upstream of footbridge	0.125	7.7	-2.555	-26.716
70688	TAN	Tanllwyth Bridge	2005.04.05 14:15	2005.04.05 14:15	2005	4	5	14:15	2005.04.05	2005.259161	2005.259161	0.07270832	-1.1384159	8.1	-5.536	-34.217	0.0185	0.01817708			stream	Main Tanllwyth stream channel above borehole T5 upstream of footbridge	0	8.1	-5.536	-34.217
70700	TAN	Tanllwyth Bridge	2005.04.12 10:14	2005.04.12 10:14	2005	4	12	10:14	2005.04.12	2005.277881	2005.277881	0.21458784	-0.6683949	8	-5.644	-35.076	0.0546	0.05364696			stream	Main Tanllwyth stream channel above borehole T5 upstream of footbridge	0	8	-5.644	-35.076
70712	TAN	Tanllwyth Bridge	2005.04.19 10:30	2005.04.19 10:30	2005	4	19	10:30	2005.04.19	2005.297089	2005.297089	0.3140214	-0.5030408	7.3	-6.16	-38.123	0.0799	0.07850535			stream	Main Tanllwyth stream channel above borehole T5 upstream of footbridge	0	7.3	-6.16	-38.123
70723	TAN	Tanllwyth Bridge	2005.04.26 10:35	2005.04.26 10:35	2005	4	26	10:35	2005.04.26	2005.316277	2005.316277	0.08921508	-1.0495617	7.4	-5.818	-36.512	0.0227	0.02230377			stream	Main Tanllwyth stream channel above borehole T5 upstream of footbridge	0	7.4	-5.818	-36.512
70735	TAN	Tanllwyth Bridge	2005.05.03 11:30	2005.05.03 11:30	2005	5	3	11:30	2005.05.03	2005.335559	2005.335559	0.16467456	-0.7833735	7	-5.838	-37.006	0.0419	0.04116864		F,Cl,NO3-by ion chromatography.	stream	Main Tanllwyth stream channel above borehole T5 upstream of footbridge	0	7	-5.838	-37.006
70747	TAN	Tanllwyth Bridge	2005.05.10 10:30	2005.05.10 10:30	2005	5	10	10:30	2005.05.10	2005.354623	2005.354623	0.08489188	-1.0711338	7.2	-5.835	-36.221	0.0216	0.02122297			stream	Main Tanllwyth stream channel above borehole T5 upstream of footbridge	0	7.2	-5.835	-36.221
70759	TAN	Tanllwyth Bridge	2005.05.17 10:14	2005.05.17 10:14	2005	5	17	10:14	2005.05.17	2005.373771	2005.373771	0.065241	-1.1854794	7.6	-5.882	-35.979	0.0166	0.01631025			stream	Main Tanllwyth stream channel above borehole T5 upstream of footbridge	0	7.6	-5.882	-35.979
70771	TAN	Tanllwyth Bridge	2005.05.24 10:42	2005.05.24 10:42	2005	5	24	10:42	2005.05.24	2005.393002	2005.393002	0.32070268	-0.4938974	7.1	-5.742	-35.278	0.0816	0.08017567			stream	Main Tanllwyth stream channel above borehole T5 upstream of footbridge	0	7.1	-5.742	-35.278
70783	TAN	Tanllwyth Bridge	2005.05.31 11:43	2005.05.31 11:43	2005	5	31	11:43	2005.05.31	2005.412296	2005.412296	0.07270832	-1.1384159	7.2	-5.847	-36.147	0.0185	0.01817708			stream	Main Tanllwyth stream channel above borehole T5 upstream of footbridge	0	7.2	-5.847	-36.147
70794	TAN	Tanllwyth Bridge	2005.06.07 12:36	2005.06.07 12:36	2005	6	7	12:36	2005.06.07	2005.431575	2005.431575	0.12969596	-0.8870736	7.1	-5.836	-35.916	0.033	0.03242399			stream	Main Tanllwyth stream channel above borehole T5 upstream of footbridge	0	7.1	-5.836	-35.916
70806	TAN	Tanllwyth Bridge	2005.06.14 09:40	2005.06.14 09:40	2005	6	14	09:40	2005.06.14	2005.450419	2005.450419	0.06327592	-1.1987615	7.4	-5.669	-35.731	0.0161	0.01581898			stream	Main Tanllwyth stream channel above borehole T5 upstream of footbridge	0	7.4	-5.669	-35.731
70816	TAN	Tanllwyth Bridge	2005.06.21 10:58	2005.06.21 10:58	2005	6	21	10:58	2005.06.21	2005.469745	2005.469745	0.07074324	-1.1503151	7.1			0.018	0.01768581			stream	Main Tanllwyth stream channel above borehole T5 upstream of footbridge	0	7.1	-4.599	-32.6
70828	TAN	Tanllwyth Bridge	2005.06.28 09:18	2005.06.28 09:18	2005	6	28	09:18	2005.06.28	2005.488733	2005.488733	0.05777364	-1.2382703	7.6	-5.451	-34.785	0.0147	0.01444341			stream	Main Tanllwyth stream channel above borehole T5 upstream of footbridge	0	7.6	-5.451	-34.785
70840	TAN	Tanllwyth Bridge	2005.07.05 08:11	2005.07.05 08:11	2005	7	5	08:11	2005.07.05	2005.507784	2005.507784	0.07663852	-1.1155529	6.8			0.0195	0.01915963			stream	Main Tanllwyth stream channel above borehole T5 upstream of footbridge	0	6.8	-4.773	-32.654
70852	TAN	Tanllwyth Bridge	2005.07.12 09:58	2005.07.12 09:58	2005	7	12	09:58	2005.07.12	2005.527165	2005.527165	0.06327592	-1.1987615	7.1	-5.393	-34.189	0.0161	0.01581898			stream	Main Tanllwyth stream channel above borehole T5 upstream of footbridge	0	7.1	-5.393	-34.189
70864	TAN	Tanllwyth Bridge	2005.07.19 10:18	2005.07.19 10:18	2005	7	19	10:18	2005.07.19	2005.546381	2005.546381	0.05620156	-1.2502516	7.5	-5.349	-34.011	0.0143	0.01405039			stream	Main Tanllwyth stream channel above borehole T5 upstream of footbridge	0	7.5	-5.349	-34.011
70876	TAN	Tanllwyth Bridge	2005.07.26 09:55	2005.07.26 09:55	2005	7	26	09:55	2005.07.26	2005.565516	2005.565516	0.07074324	-1.1503151	7.9	-5.782	-36.014	0.018	0.01768581			stream	Main Tanllwyth stream channel above borehole T5 upstream of footbridge	0	7.9	-5.782	-36.014
70888	TAN	Tanllwyth Bridge	2005.08.02 12:00	2005.08.02 12:00	2005	8	2	12:00	2005.08.02	2005.584932	2005.584932	0.07663852	-1.1155529	7	-5.663	-35.775	0.0195	0.01915963			stream	Main Tanllwyth stream channel above borehole T5 upstream of footbridge	0	7	-5.663	-35.775
70900	TAN	Tanllwyth Bridge	2005.08.09 12:15	2005.08.09 12:15	2005	8	9	12:15	2005.08.09	2005.604138	2005.604138	0.07467344	-1.1268338	7.2	-5.604	-35.31	0.019	0.01866836			stream	Main Tanllwyth stream channel above borehole T5 upstream of footbridge	0	7.2	-5.604	-35.31
70912	TAN	Tanllwyth Bridge	2005.08.16 13:18	2005.08.16 13:18	2005	8	16	13:18	2005.08.16	2005.623436	2005.623436	0.06917116	-1.1600749	7.3	-5.685	-35.616	0.0176	0.01729279			stream	Main Tanllwyth stream channel above borehole T5 upstream of footbridge	0	7.3	-5.685	-35.616
70924	TAN	Tanllwyth Bridge	2005.08.23 10:20	2005.08.23 10:20	2005	8	23	10:20	2005.08.23	2005.642276	2005.642276	0.05620156	-1.2502516	7.9	-5.765	-35.826	0.0143	0.01405039			stream	Main Tanllwyth stream channel above borehole T5 upstream of footbridge	0	7.9	-5.765	-35.826
70936	TAN	Tanllwyth Bridge	2005.08.30 12:10	2005.08.30 12:10	2005	8	30	12:10	2005.08.30	2005.661663	2005.661663	0.06327592	-1.1987615	7.8	-5.7	-34.801	0.0161	0.01581898			stream	Main Tanllwyth stream channel above borehole T5 upstream of footbridge	0	7.8	-5.7	-34.801
70948	TAN	Tanllwyth Bridge	2005.09.06 11:42	2005.09.06 11:42	2005	9	6	11:42	2005.09.06	2005.680788	2005.680788	0.05462952	-1.2625726	7.3	-5.717	-35.076	0.0139	0.01365738			stream	Main Tanllwyth stream channel above borehole T5 upstream of footbridge	0	7.3	-5.717	-35.076
70960	TAN	Tanllwyth Bridge	2005.09.13 11:12	2005.09.13 11:12	2005	9	13	11:12	2005.09.13	2005.699909	2005.699909	0.05777364	-1.2382703	7.1	-5.6	-34.716	0.0147	0.01444341			stream	Main Tanllwyth stream channel above borehole T5 upstream of footbridge	0	7.1	-5.6	-34.716
70972	TAN	Tanllwyth Bridge	2005.09.20 11:30	2005.09.20 11:30	2005	9	20	11:30	2005.09.20	2005.719121	2005.719121	0.07663852	-1.1155529	7	-5.521	-33.899	0.0195	0.01915963			stream	Main Tanllwyth stream channel above borehole T5 upstream of footbridge	0	7	-5.521	-33.899
70984	TAN	Tanllwyth Bridge	2005.09.27 11:39	2005.09.27 11:39	2005	9	27	11:39	2005.09.27	2005.738316	2005.738316	0.22323424	-0.6512392	6.8	-4.874	-28.88	0.0568	0.05580856			stream	Main Tanllwyth stream channel above borehole T5 upstream of footbridge	0	6.8	-4.874	-28.88
70996	TAN	Tanllwyth Bridge	2005.10.04 10:10	2005.10.04 10:10	2005	10	4	10:10	2005.10.04	2005.757325	2005.757325	0.15170496	-0.8190002	7	-5.275	-31.22	0.0386	0.03792624			stream	Main Tanllwyth stream channel above borehole T5 upstream of footbridge	0	7	-5.275	-31.22
71008	TAN	Tanllwyth Bridge	2005.10.11 09:55	2005.10.11 09:55	2005	10	11	09:55	2005.10.11	2005.776475	2005.776475	0.0786036	-1.1045576	7.2			0.02	0.0196509			stream	Main Tanllwyth stream channel above borehole T5 upstream of footbridge	0	7.2	-4.589	-30.33
71020	TAN	Tanllwyth Bridge	2005.10.18 09:58	2005.10.18 09:58	2005	10	18	09:58	2005.10.18	2005.795658	2005.795658	0.07270832	-1.1384159	7.5	-5.163	-31.84	0.0185	0.01817708			stream	Main Tanllwyth stream channel above borehole T5 upstream of footbridge	0	7.5	-5.163	-31.84
71032	TAN	Tanllwyth Bridge	2005.10.25 10:42	2005.10.25 10:42	2005	10	25	10:42	2005.10.25	2005.81492	2005.81492	0.97468464	-0.0111359	5.3	-6.119	-37.134	0.248	0.24367116			stream	Main Tanllwyth stream channel above borehole T5 upstream of footbridge	0	5.3	-6.119	-37.134
71044	TAN	Tanllwyth Bridge	2005.11.01 11:15	2005.11.01 11:15	2005	11	1	11:15	2005.11.01	2005.834161	2005.834161	0.26555895	-0.5758391	6.7	-5.606	-35.113	0.06757	0.06638974			stream	Main Tanllwyth stream channel above borehole T5 upstream of footbridge	0	6.7	-5.606	-35.113
71056	TAN	Tanllwyth Bridge	2005.11.08 11:35	2005.11.08 11:35	2005	11	8	11:35	2005.11.08	2005.853377	2005.853377	1.85229384	0.26770988	5.4			0.4713	0.46307346			stream	Main Tanllwyth stream channel above borehole T5 upstream of footbridge	0	5.4	-4.877	-33.182
71068	TAN	Tanllwyth Bridge	2005.11.15 16:20	2005.11.15 16:20	2005	11	15	16:20	2005.11.15	2005.873097	2005.873097	0.17528604	-0.7562527	6.7			0.0446	0.04382151			stream	Main Tanllwyth stream channel above borehole T5 upstream of footbridge	0	6.7	-5.013	-32.117
71080	TAN	Tanllwyth Bridge	2005.11.22 10:58	2005.11.22 10:58	2005	11	22	10:58	2005.11.22	2005.891663	2005.891663	0.065241	-1.1854794	7.3	-5.249	-33.543	0.0166	0.01631025			stream	Main Tanllwyth stream channel above borehole T5 upstream of footbridge	0	7.3	-5.249	-33.543
71091	TAN	Tanllwyth Bridge	2005.11.29 10:40	2005.11.29 10:40	2005	11	29	10:40	2005.11.29	2005.910807	2005.910807	0.05777364	-1.2382703	7.2	-5.505	-33.571	0.0147	0.01444341			stream	Main Tanllwyth stream channel above borehole T5 upstream of footbridge	0	7.2	-5.505	-33.571
71102	TAN	Tanllwyth Bridge	2005.12.05 13:45	2005.12.05 13:45	2005	12	5	13:45	2005.12.05	2005.927597	2005.927597	0.47515876	-0.3231613	6.9			0.1209	0.11878969			stream	Main Tanllwyth stream channel above borehole T5 upstream of footbridge	0.125	6.9	-3.323	-30.335
71114	TAN	Tanllwyth Bridge	2005.12.12 10:50	2005.12.12 10:50	2005	12	12	10:50	2005.12.12	2005.946442	2005.946442	0.10847296	-0.9646785	7.1	-5.843	-35.889	0.0276	0.02711824			stream	Main Tanllwyth stream channel above borehole T5 upstream of footbridge	0	7.1	-5.843	-35.889
71126	TAN	Tanllwyth Bridge	2005.12.20 11:24	2005.12.20 11:24	2005	12	20	11:24	2005.12.20	2005.968425	2005.968425	0.15170496	-0.8190002	7			0.0386	0.03792624			stream	Main Tanllwyth stream channel above borehole T5 upstream of footbridge	0	7	-4.484	-32.225
71138	TAN	Tanllwyth Bridge	2006.01.03 13:13	2006.01.03 13:13	2006	1	3	13:13	2006.01.03	2006.006988	2006.006988	0.33406532	-0.4761686	6.6			0.085	0.08351633			stream	Main Tanllwyth stream channel above borehole T5 upstream of footbridge	0	6.6	-5.065	-33.542
71150	TAN	Tanllwyth Bridge	2006.01.10 10:50	2006.01.10 10:50	2006	1	10	10:50	2006.01.10	2006.025894	2006.025894	1.17984004	0.07182313	6	-6.014	-36.637	0.3002	0.29496001			stream	Main Tanllwyth stream channel above borehole T5 upstream of footbridge	0	6	-6.014	-36.637
71162	TAN	Tanllwyth Bridge	2006.01.17 11:38	2006.01.17 11:38	2006	1	17	11:38	2006.01.17	2006.045164	2006.045164	0.30380292	-0.5174081	5.8			0.0773	0.07595073			stream	Main Tanllwyth stream channel above borehole T5 upstream of footbridge	0	5.8	-4.953	-33.238
71174	TAN	Tanllwyth Bridge	2006.01.24 10:35	2006.01.24 10:35	2006	1	24	10:35	2006.01.24	2006.064222	2006.064222	0.11554728	-0.9372403	6.6	-5.918	-35.338	0.0294	0.02888682			stream	Main Tanllwyth stream channel above borehole T5 upstream of footbridge	0	6.6	-5.918	-35.338
71186	TAN	Tanllwyth Bridge	2006.01.31 11:58	2006.01.31 11:58	2006	1	31	11:58	2006.01.31	2006.083558	2006.083558	0.05973872	-1.2237441	6.7			0.0152	0.01493468			stream	Main Tanllwyth stream channel above borehole T5 upstream of footbridge	0.125	6.7	-2.397	-26.157
71196	TAN	Tanllwyth Bridge	2006.02.07 11:15	2006.02.07 11:15	2006	2	7	11:15	2006.02.07	2006.102654	2006.102654	0.05109236	-1.291644	7.2	-5.769	-35.779	0.013	0.01277309			stream	Main Tanllwyth stream channel above borehole T5 upstream of footbridge	0	7.2	-5.769	-35.779
71207	TAN	Tanllwyth Bridge	2006.02.14 13:57	2006.02.14 13:57	2006	2	14	13:57	2006.02.14	2006.12214	2006.12214	0.31716552	-0.498714	6.1	-5.66	-34.468	0.0807	0.07929138			stream	Main Tanllwyth stream channel above borehole T5 upstream of footbridge	0	6.1	-5.66	-34.468
71219	TAN	Tanllwyth Bridge	2006.02.21 09:58	2006.02.21 09:58	2006	2	21	09:58	2006.02.21	2006.140864	2006.140864	0.10179168	-0.9922877	7	-5.796	-35.971	0.0259	0.02544792			stream	Main Tanllwyth stream channel above borehole T5 upstream of footbridge	0	7	-5.796	-35.971
71231	TAN	Tanllwyth Bridge	2006.02.28 10:52	2006.02.28 10:52	2006	2	28	10:52	2006.02.28	2006.160145	2006.160145	0.07270832	-1.1384159	6.5			0.0185	0.01817708			stream	Main Tanllwyth stream channel above borehole T5 upstream of footbridge	0.125	6.5	-2.498	-27.543
71243	TAN	Tanllwyth Bridge	2006.03.07 10:42	2006.03.07 10:42	2006	3	7	10:42	2006.03.07	2006.179304	2006.179304	0.36813537	-0.4339925	6.7			0.09367	0.09203384			stream	Main Tanllwyth stream channel above borehole T5 upstream of footbridge		6.7
71255	TAN	Tanllwyth Bridge	2006.03.14 11:01	2006.03.14 11:01	2006	3	14	11:01	2006.03.14	2006.198518	2006.198518	0.90629952	-0.0427283	7.3	-5.801	-34.935	0.2306	0.22657488			stream	Main Tanllwyth stream channel above borehole T5 upstream of footbridge	0	7.3	-5.801	-34.935
71266	TAN	Tanllwyth Bridge	2006.03.21 10:25	2006.03.21 10:25	2006	3	21	10:25	2006.03.21	2006.217628	2006.217628	0.08096172	-1.0917203	7.3			0.0206	0.02024043			stream	Main Tanllwyth stream channel above borehole T5 upstream of footbridge	0.16666	7.3	-0.679	-22.624
71278	TAN	Tanllwyth Bridge	2006.03.27 10:31	2006.03.27 10:31	2006	3	27	10:31	2006.03.27	2006.234077	2006.234077	2.3624312	0.37335917	5.6			0.6011	0.5906078			stream	Main Tanllwyth stream channel above borehole T5 upstream of footbridge	0	5.6	-5.102	-35.183
71290	TAN	Tanllwyth Bridge	2006.04.04 09:10	2006.04.04 09:10	2006	4	4	09:10	2006.04.04	2006.255841	2006.255841	0.22912948	-0.639919	6.5	-5.563	-35.504	0.0583	0.05728237			stream	Main Tanllwyth stream channel above borehole T5 upstream of footbridge	0	6.5	-5.563	-35.504
71302	TAN	Tanllwyth Bridge	2006.04.11 10:32	2006.04.11 10:32	2006	4	11	10:32	2006.04.11	2006.275175	2006.275175	0.94520828	-0.0244725	6.8			0.2405	0.23630207			stream	Main Tanllwyth stream channel above borehole T5 upstream of footbridge	0.33333	6.8	3.58	-11.082
71314	TAN	Tanllwyth Bridge	2006.04.18 10:40	2006.04.18 10:40	2006	4	18	10:40	2006.04.18	2006.294368	2006.294368	0.09982656	-1.0007539	6.9	-5.809	-35.295	0.0254	0.02495664			stream	Main Tanllwyth stream channel above borehole T5 upstream of footbridge	0	6.9	-5.809	-35.295
71326	TAN	Tanllwyth Bridge	2006.04.25 10:04	2006.04.25 10:04	2006	4	25	10:04	2006.04.25	2006.313478	2006.313478	0.16231644	-0.7896375	6.5			0.0413	0.04057911			stream	Main Tanllwyth stream channel above borehole T5 upstream of footbridge	0	6.5	-5.03	-33.066
71338	TAN	Tanllwyth Bridge	2006.05.02 09:50	2006.05.02 09:50	2006	5	2	09:50	2006.05.02	2006.332629	2006.332629	0.09314528	-1.0308391	7.1			0.0237	0.02328632			stream	Main Tanllwyth stream channel above borehole T5 upstream of footbridge	0	7.1	-4.728	-32.657
71350	TAN	Tanllwyth Bridge	2006.05.09 10:31	2006.05.09 10:31	2006	5	9	10:31	2006.05.09	2006.351886	2006.351886	0.16742568	-0.7761779	6.3			0.0426	0.04185642			stream	Main Tanllwyth stream channel above borehole T5 upstream of footbridge	0.25	6.3	1.386	-17.84
71362	TAN	Tanllwyth Bridge	2006.05.16 09:56	2006.05.16 09:56	2006	5	16	09:56	2006.05.16	2006.370997	2006.370997	0.06917116	-1.1600749	6.8	-5.635	-34.921	0.0176	0.01729279			stream	Main Tanllwyth stream channel above borehole T5 upstream of footbridge	0	6.8	-5.635	-34.921
71374	TAN	Tanllwyth Bridge	2006.05.23 10:15	2006.05.23 10:15	2006	5	23	10:15	2006.05.23	2006.390211	2006.390211	0.415027	-0.3819236	6.1			0.1056	0.10375675			stream	Main Tanllwyth stream channel above borehole T5 upstream of footbridge	0.33333	6.1	4.177	-10.838
71386	TAN	Tanllwyth Bridge	2006.05.30 08:55	2006.05.30 08:55	2006	5	30	08:55	2006.05.30	2006.409237	2006.409237	0.15170496	-0.8190002	6.1	-5.541	-35.376	0.0386	0.03792624			stream	Main Tanllwyth stream channel above borehole T5 upstream of footbridge	0	6.1	-5.541	-35.376
71397	TAN	Tanllwyth Bridge	2006.06.06 10:16	2006.06.06 10:16	2006	6	6	10:16	2006.06.06	2006.428569	2006.428569	0.05777364	-1.2382703	6.3			0.0147	0.01444341			stream	Main Tanllwyth stream channel above borehole T5 upstream of footbridge	0.125	6.3	-2.507	-27.602
71407	TAN	Tanllwyth Bridge	2006.06.13 10:37	2006.06.13 10:37	2006	6	13	10:37	2006.06.13	2006.447787	2006.447787	0.05777364	-1.2382703	6.5	-5.864	-35.918	0.0147	0.01444341			stream	Main Tanllwyth stream channel above borehole T5 upstream of footbridge	0	6.5	-5.864	-35.918
71419	TAN	Tanllwyth Bridge	2006.06.20 09:44	2006.06.20 09:44	2006	6	20	09:44	2006.06.20	2006.466865	2006.466865	0.04952028	-1.3052169	6.8			0.0126	0.01238007			stream	Main Tanllwyth stream channel above borehole T5 upstream of footbridge	0.125	6.8	-2.568	-27.319
71431	TAN	Tanllwyth Bridge	2006.06.27 09:20	2006.06.27 09:20	2006	6	27	09:20	2006.06.27	2006.485997	2006.485997	0.05777364	-1.2382703	7	-5.541	-35.178	0.0147	0.01444341			stream	Main Tanllwyth stream channel above borehole T5 upstream of footbridge	0	7	-5.541	-35.178
71443	TAN	Tanllwyth Bridge	2006.07.04 10:24	2006.07.04 10:24	2006	7	4	10:24	2006.07.04	2006.505297	2006.505297	0.04676916	-1.3300404	6.8			0.0119	0.01169229			stream	Main Tanllwyth stream channel above borehole T5 upstream of footbridge	0.16666	6.8	-0.397	-21.689
71454	TAN	Tanllwyth Bridge	2006.07.11 10:40	2006.07.11 10:40	2006	7	11	10:40	2006.07.11	2006.524505	2006.524505	0.043625	-1.3602646	7.2	-5.386	-34.192	0.0111	0.01090625			stream	Main Tanllwyth stream channel above borehole T5 upstream of footbridge	0	7.2	-5.386	-34.192
71466	TAN	Tanllwyth Bridge	2006.07.18 10:08	2006.07.18 10:08	2006	7	18	10:08	2006.07.18	2006.543623	2006.543623	0.0393018	-1.4055876	7.1			0.01	0.00982545			stream	Main Tanllwyth stream channel above borehole T5 upstream of footbridge	0.16666	7.1	-0.967	-23.078
71476	TAN	Tanllwyth Bridge	2006.07.25 09:53	2006.07.25 09:53	2006	7	25	09:53	2006.07.25	2006.562772	2006.562772	0.03537164	-1.4513448	7.4	-5.615	-34.73	0.009	0.00884291			stream	Main Tanllwyth stream channel above borehole T5 upstream of footbridge	0	7.4	-5.615	-34.73
71486	TAN	Tanllwyth Bridge	2006.08.01 11:04	2006.08.01 11:04	2006	8	1	11:04	2006.08.01	2006.582085	2006.582085	0.03419256	-1.4660684	8.2	-5.629	-34.992	0.0087	0.00854814			stream	Main Tanllwyth stream channel above borehole T5 upstream of footbridge	0	8.2	-5.629	-34.992
71498	TAN	Tanllwyth Bridge	2006.08.08 09:55	2006.08.08 09:55	2006	8	8	09:55	2006.08.08	2006.601132	2006.601132	0.0349786	-1.4561976	7.7	-5.574	-35.409	0.0089	0.00874465			stream	Main Tanllwyth stream channel above borehole T5 upstream of footbridge	0	7.7	-5.574	-35.409
71509	TAN	Tanllwyth Bridge	2006.08.15 11:03	2006.08.15 11:03	2006	8	15	11:03	2006.08.15	2006.62044	2006.62044	0.02318808	-1.6347352	7.4	-5.764	-36.002	0.0059	0.00579702			stream	Main Tanllwyth stream channel above borehole T5 upstream of footbridge	0	7.4	-5.764	-36.002
71518	TAN	Tanllwyth Bridge	2006.08.22 09:23	2006.08.22 09:23	2006	8	22	09:23	2006.08.22	2006.639427	2006.639427	0.14187952	-0.8480803	6.9	-6.16	-39.627	0.0361	0.03546988			stream	Main Tanllwyth stream channel above borehole T5 upstream of footbridge	0	6.9	-6.16	-39.627
71529	TAN	Tanllwyth Bridge	2006.08.29 12:56	2006.08.29 12:56	2006	8	29	12:56	2006.08.29	2006.659011	2006.659011	0.08096172	-1.0917203	6.7	-6.117	-38.461	0.0206	0.02024043			stream	Main Tanllwyth stream channel above borehole T5 upstream of footbridge	0	6.7	-6.117	-38.461
71538	TAN	Tanllwyth Bridge	2006.09.05 09:47	2006.09.05 09:47	2006	9	5	09:47	2006.09.05	2006.677829	2006.677829	0.21144368	-0.6748053	6.5	-5.701	-36.956	0.0538	0.05286092			stream	Main Tanllwyth stream channel above borehole T5 upstream of footbridge	0	6.5	-5.701	-36.956
71549	TAN	Tanllwyth Bridge	2006.09.12 11:16	2006.09.12 11:16	2006	9	12	11:16	2006.09.12	2006.697177	2006.697177	0.05973872	-1.2237441	6.7	-5.966	-37.74	0.0152	0.01493468			stream	Main Tanllwyth stream channel above borehole T5 upstream of footbridge	0	6.7	-5.966	-37.74
71558	TAN	Tanllwyth Bridge	2006.09.19 09:50	2006.09.19 09:50	2006	9	19	09:50	2006.09.19	2006.716191	2006.716191	0.05620156	-1.2502516	7.1	-5.925	-36.494	0.0143	0.01405039			stream	Main Tanllwyth stream channel above borehole T5 upstream of footbridge	0	7.1	-5.925	-36.494
71569	TAN	Tanllwyth Bridge	2006.09.26 13:08	2006.09.26 13:08	2006	9	26	13:08	2006.09.26	2006.735746	2006.735746	0.065241	-1.1854794	7	-6.016	-37.307	0.0166	0.01631025			stream	Main Tanllwyth stream channel above borehole T5 upstream of footbridge	0	7	-6.016	-37.307
71578	TAN	Tanllwyth Bridge	2006.10.03 10:00	2006.10.03 10:00	2006	10	3	10:00	2006.10.03	2006.754566	2006.754566	0.33720944	-0.4721003	6.5	-5.699	-35.363	0.0858	0.08430236			stream	Main Tanllwyth stream channel above borehole T5 upstream of footbridge	0	6.5	-5.699	-35.363
71589	TAN	Tanllwyth Bridge	2006.10.10 12:20	2006.10.10 12:20	2006	10	10	12:20	2006.10.10	2006.774011	2006.774011	0.12969596	-0.8870736	6.4	-5.689	-35.084	0.033	0.03242399			stream	Main Tanllwyth stream channel above borehole T5 upstream of footbridge	0	6.4	-5.689	-35.084
71598	TAN	Tanllwyth Bridge	2006.10.17 09:40	2006.10.17 09:40	2006	10	17	09:40	2006.10.17	2006.792884	2006.792884	0.065241	-1.1854794	6.8	-5.847	-35.762	0.0166	0.01631025			stream	Main Tanllwyth stream channel above borehole T5 upstream of footbridge	0	6.8	-5.847	-35.762
71609	TAN	Tanllwyth Bridge	2006.10.24 09:35	2006.10.24 09:35	2006	10	24	09:35	2006.10.24	2006.812053	2006.812053	0.24720832	-0.6069369	6.5	-5.737	-34.77	0.0629	0.06180208			stream	Main Tanllwyth stream channel above borehole T5 upstream of footbridge	0	6.5	-5.737	-34.77
71618	TAN	Tanllwyth Bridge	2006.10.31 10:40	2006.10.31 10:40	2006	10	31	10:40	2006.10.31	2006.831355	2006.831355	0.27196844	-0.5654815	7.3	-5.656	-33.521	0.0692	0.06799211			stream	Main Tanllwyth stream channel above borehole T5 upstream of footbridge	0	7.3	-5.656	-33.521
71629	TAN	Tanllwyth Bridge	2006.11.08 14:31	2006.11.08 14:31	2006	11	8	14:31	2006.11.08	2006.853712	2006.853712	0.12026352	-0.9198661	7	-5.683	-34.091	0.0306	0.03006588			stream	Main Tanllwyth stream channel above borehole T5 upstream of footbridge	0	7	-5.683	-34.091
71638	TAN	Tanllwyth Bridge	2006.11.14 10:46	2006.11.14 10:46	2006	11	14	10:46	2006.11.14	2006.869722	2006.869722	0.56240876	-0.2499479	6.9	-5.325	-32.109	0.1431	0.14060219			stream	Main Tanllwyth stream channel above borehole T5 upstream of footbridge	0	6.9	-5.325	-32.109
71649	TAN	Tanllwyth Bridge	2006.11.21 10:49	2006.11.21 10:49	2006	11	21	10:49	2006.11.21	2006.888906	2006.888906	0.38633668	-0.4130341	6.8	-5.579	-32.139	0.0983	0.09658417			stream	Main Tanllwyth stream channel above borehole T5 upstream of footbridge	0	6.8	-5.579	-32.139
71658	TAN	Tanllwyth Bridge	2006.11.28 10:43	2006.11.28 10:43	2006	11	28	10:43	2006.11.28	2006.908073	2006.908073	0.4712286	-0.3267684	7.9	-6.158	-34.744	0.1199	0.11780715			stream	Main Tanllwyth stream channel above borehole T5 upstream of footbridge	0	7.9	-6.158	-34.744
71669	TAN	Tanllwyth Bridge	2006.12.05 14:20	2006.12.05 14:20	2006	12	5	14:20	2006.12.05	2006.927664	2006.927664	1.29813844	0.11332101	10.8	-5.798	-33.825	0.3303	0.32453461			stream	Main Tanllwyth stream channel above borehole T5 upstream of footbridge	0	10.8	-5.798	-33.825
71678	TAN	Tanllwyth Bridge	2006.12.12 10:45	2006.12.12 10:45	2006	12	12	10:45	2006.12.12	2006.946433	2006.946433	0.47908896	-0.3195838	13.1	-5.813	-32.503	0.1219	0.11977224			stream	Main Tanllwyth stream channel above borehole T5 upstream of footbridge	0	13.1	-5.813	-32.503
71689	TAN	Tanllwyth Bridge	2006.12.19 10:52	2006.12.19 10:52	2006	12	19	10:52	2006.12.19	2006.965624	2006.965624	0.21733896	-0.6628624	9.3	-5.521	-31.328	0.0553	0.05433474			stream	Main Tanllwyth stream channel above borehole T5 upstream of footbridge	0	9.3	-5.521	-31.328
71698	TAN	Tanllwyth Bridge	2007.01.02 11:20	2007.01.02 11:20	2007	1	2	11:20	2007.01.02	2007.004034	2007.004034	0.3757252	-0.4251297	9.9	-5.532	-31.147	0.0956	0.0939313			stream	Main Tanllwyth stream channel above borehole T5 upstream of footbridge	0	9.9	-5.532	-31.147
71709	TAN	Tanllwyth Bridge	2007.01.09 11:05	2007.01.09 11:05	2007	1	9	11:05	2007.01.09	2007.023183	2007.023183	2.02836592	0.30714631	9.3	-5.215	-29.458	0.5161	0.50709148			stream	Main Tanllwyth stream channel above borehole T5 upstream of footbridge	0	9.3	-5.215	-29.458
71720	TAN	Tanllwyth Bridge	2007.01.16 13:35	2007.01.16 13:35	2007	1	16	13:35	2007.01.16	2007.042647	2007.042647	0.22912948	-0.639919	9.4	-5.353	-29.763	0.0583	0.05728237			stream	Main Tanllwyth stream channel above borehole T5 upstream of footbridge	0	9.4	-5.353	-29.763
71729	TAN	Tanllwyth Bridge	2007.01.23 13:37	2007.01.23 13:37	2007	1	23	13:37	2007.01.23	2007.061828	2007.061828	0.2440642	-0.6124959	10.4	-5.325	-29.98	0.0621	0.06101605			stream	Main Tanllwyth stream channel above borehole T5 upstream of footbridge	0	10.4	-5.325	-29.98
71740	TAN	Tanllwyth Bridge	2007.01.31 11:15	2007.01.31 11:15	2007	1	31	11:15	2007.01.31	2007.083476	2007.083476	0.07270832	-1.1384159	9.8	-5.179	-30.764	0.0185	0.01817708			stream	Main Tanllwyth stream channel above borehole T5 upstream of footbridge	0	9.8	-5.179	-30.764
71749	TAN	Tanllwyth Bridge	2007.02.06 11:00	2007.02.06 11:00	2007	2	6	11:00	2007.02.06	2007.099886	2007.099886	0.05620156	-1.2502516		-5.416	-31.488	0.0143	0.01405039			stream	Main Tanllwyth stream channel above borehole T5 upstream of footbridge	0		-5.416	-31.488
71760	TAN	Tanllwyth Bridge	2007.02.13 14:06	2007.02.13 14:06	2007	2	13	14:06	2007.02.13	2007.119418	2007.119418	0.57891552	-0.2373848	9.8	-6.382	-37.635	0.1473	0.14472888			stream	Main Tanllwyth stream channel above borehole T5 upstream of footbridge	0	9.8	-6.382	-37.635
71769	TAN	Tanllwyth Bridge	2007.02.21 11:02	2007.02.21 11:02	2007	2	21	11:02	2007.02.21	2007.140986	2007.140986	0.13205404	-0.8792483	9.3	-6.109	-36.011	0.0336	0.03301351			stream	Main Tanllwyth stream channel above borehole T5 upstream of footbridge	0	9.3	-6.109	-36.011
71780	TAN	Tanllwyth Bridge	2007.02.27 14:00	2007.02.27 14:00	2007	2	27	14:00	2007.02.27	2007.157763	2007.157763	1.29813844	0.11332101	7.5	-6.427	-39.544	0.3303	0.32453461			stream	Main Tanllwyth stream channel above borehole T5 upstream of footbridge	0	7.5	-6.427	-39.544
71789	TAN	Tanllwyth Bridge	2007.03.06 12:50	2007.03.06 12:50	2007	3	6	12:50	2007.03.06	2007.176808	2007.176808	0.99472856	-0.0022954	11.3	-6.926	-43.632	0.2531	0.24868214			stream	Main Tanllwyth stream channel above borehole T5 upstream of footbridge	0	11.3	-6.926	-43.632
71800	TAN	Tanllwyth Bridge	2007.03.13 12:55	2007.03.13 12:55	2007	3	13	12:55	2007.03.13	2007.195995	2007.195995	0.10414976	-0.9823417	9.6	-6.265	-38.298	0.0265	0.02603744			stream	Main Tanllwyth stream channel above borehole T5 upstream of footbridge	0	9.6	-6.265	-38.298
71809	TAN	Tanllwyth Bridge	2007.03.20 10:59	2007.03.20 10:59	2007	3	20	10:59	2007.03.20	2007.214952	2007.214952	0.1835394	-0.7362707	10.6	-6.217	-38.079	0.0467	0.04588485			stream	Main Tanllwyth stream channel above borehole T5 upstream of footbridge	0	10.6	-6.217	-38.079
71820	TAN	Tanllwyth Bridge	2007.03.27 13:08	2007.03.27 13:08	2007	3	27	13:08	2007.03.27	2007.234376	2007.234376	0.0786036	-1.1045576	9	-6.103	-37.038	0.02	0.0196509			stream	Main Tanllwyth stream channel above borehole T5 upstream of footbridge	0	9	-6.103	-37.038
71829	TAN	Tanllwyth Bridge	2007.04.03 09:43	2007.04.03 09:43	2007	4	3	09:43	2007.04.03	2007.253164	2007.253164	0.05777364	-1.2382703	9.1	-6.056	-36.578	0.0147	0.01444341			stream	Main Tanllwyth stream channel above borehole T5 upstream of footbridge	0	9.1	-6.056	-36.578
71840	TAN	Tanllwyth Bridge	2007.04.10 13:50	2007.04.10 13:50	2007	4	10	13:50	2007.04.10	2007.272812	2007.272812	0.05462952	-1.2625726	8.5	-6.004	-36.047	0.0139	0.01365738			stream	Main Tanllwyth stream channel above borehole T5 upstream of footbridge	0	8.5	-6.004	-36.047
71849	TAN	Tanllwyth Bridge	2007.04.17 09:52	2007.04.17 09:52	2007	4	17	09:52	2007.04.17	2007.291537	2007.291537	0.05109236	-1.291644	8.8	-5.911	-35.442	0.013	0.01277309			stream	Main Tanllwyth stream channel above borehole T5 upstream of footbridge	0	8.8	-5.911	-35.442
71860	TAN	Tanllwyth Bridge	2007.04.24 12:37	2007.04.24 12:37	2007	4	24	12:37	2007.04.24	2007.311029	2007.311029	0.2531036	-0.5967017	11.2	-6.241	-38.826	0.0644	0.0632759			stream	Main Tanllwyth stream channel above borehole T5 upstream of footbridge	0	11.2	-6.241	-38.826
71869	TAN	Tanllwyth Bridge	2007.05.01 09:40	2007.05.01 09:40	2007	5	1	09:40	2007.05.01	2007.329871	2007.329871	0.0562012	-1.2502544	9.2	-5.904	-35.902	0.0143	0.0140503			stream	Main Tanllwyth stream channel above borehole T5 upstream of footbridge	0	9.2	-5.904	-35.902
71880	TAN	Tanllwyth Bridge	2007.05.08 11:45	2007.05.08 11:45	2007	5	8	11:45	2007.05.08	2007.349287	2007.349287	0.1226216	-0.911433	8.7	-5.705	-34.62	0.0312	0.0306554			stream	Main Tanllwyth stream channel above borehole T5 upstream of footbridge	0	8.7	-5.705	-34.62
71889	TAN	Tanllwyth Bridge	2007.05.15 15:40	2007.05.15 15:40	2007	5	15	15:40	2007.05.15	2007.368912	2007.368912	0.34428376	-0.4630835	9.2	-6.427	-40.382	0.0876	0.08607094			stream	Main Tanllwyth stream channel above borehole T5 upstream of footbridge	0	9.2	-6.427	-40.382
71900	TAN	Tanllwyth Bridge	2007.05.22 11:35	2007.05.22 11:35	2007	5	22	11:35	2007.05.22	2007.387624	2007.387624	0.11554728	-0.9372403	8.8	-6.115	-38.194	0.0294	0.02888682			stream	Main Tanllwyth stream channel above borehole T5 upstream of footbridge	0	8.8	-6.115	-38.194
71909	TAN	Tanllwyth Bridge	2007.05.29 09:50	2007.05.29 09:50	2007	5	29	09:50	2007.05.29	2007.406602	2007.406602	0.0613108	-1.212463	9.1	-6.098	-37.397	0.0156	0.0153277			stream	Main Tanllwyth stream channel above borehole T5 upstream of footbridge	0	9.1	-6.098	-37.397
71920	TAN	Tanllwyth Bridge	2007.06.05 12:28	2007.06.05 12:28	2007	6	5	12:28	2007.06.05	2007.426081	2007.426081	0.05777364	-1.2382703	8.5	-6.004	-37.023	0.0147	0.01444341			stream	Main Tanllwyth stream channel above borehole T5 upstream of footbridge	0	8.5	-6.004	-37.023
71929	TAN	Tanllwyth Bridge	2007.06.12 10:36	2007.06.12 10:36	2007	6	12	10:36	2007.06.12	2007.445046	2007.445046	0.05109236	-1.291644	8.9	-5.968	-36.426	0.013	0.01277309			stream	Main Tanllwyth stream channel above borehole T5 upstream of footbridge	0	8.9	-5.968	-36.426
71940	TAN	Tanllwyth Bridge	2007.06.19 11:00	2007.06.19 11:00	2007	6	19	11:00	2007.06.19	2007.464269	2007.464269	0.06720608	-1.1725914	8.6	-6.15	-38.168	0.0171	0.01680152			stream	Main Tanllwyth stream channel above borehole T5 upstream of footbridge	0	8.6	-6.15	-38.168
71949	TAN	Tanllwyth Bridge	2007.06.26 09:53	2007.06.26 09:53	2007	6	26	09:53	2007.06.26	2007.48332	2007.48332	0.33406532	-0.4761686	8.6	-6.577	-42.845	0.085	0.08351633			stream	Main Tanllwyth stream channel above borehole T5 upstream of footbridge	0	8.6	-6.577	-42.845
71960	TAN	Tanllwyth Bridge	2007.07.03 10:05	2007.07.03 10:05	2007	7	3	10:05	2007.07.03	2007.502521	2007.502521	0.502277	-0.2990567	7.7	-6.473	-41.467	0.1278	0.12556925			stream	Main Tanllwyth stream channel above borehole T5 upstream of footbridge	0	7.7	-6.473	-41.467
71969	TAN	Tanllwyth Bridge	2007.07.10 09:52	2007.07.10 09:52	2007	7	10	09:52	2007.07.10	2007.521674	2007.521674	0.43349884	-0.3630121	7.6	-6.175	-40.377	0.1103	0.10837471			stream	Main Tanllwyth stream channel above borehole T5 upstream of footbridge	0	7.6	-6.175	-40.377
71980	TAN	Tanllwyth Bridge	2007.07.17 12:50	2007.07.17 12:50	2007	7	17	12:50	2007.07.17	2007.541191	2007.541191	0.15956532	-0.7970615	7.31	-6.431	-41.004	0.0406	0.03989133			stream	Main Tanllwyth stream channel above borehole T5 upstream of footbridge	0	7.31	-6.431	-41.004
71989	TAN	Tanllwyth Bridge	2007.07.24 10:01	2007.07.24 10:01	2007	7	24	10:01	2007.07.24	2007.560048	2007.560048	0.23502476	-0.6288864	6.82	-6.631	-43.388	0.0598	0.05875619			stream	Main Tanllwyth stream channel above borehole T5 upstream of footbridge	0	6.82	-6.631	-43.388
72000	TAN	Tanllwyth Bridge	2007.07.31 10:25	2007.07.31 10:25	2007	7	31	10:25	2007.07.31	2007.579271	2007.579271	0.11554728	-0.9372403	6.73	-6.539	-41.891	0.0294	0.02888682			stream	Main Tanllwyth stream channel above borehole T5 upstream of footbridge	0	6.73	-6.539	-41.891
72009	TAN	Tanllwyth Bridge	2007.08.07 09:49	2007.08.07 09:49	2007	8	7	09:49	2007.08.07	2007.598381	2007.598381	0.0613108	-1.212463	7.71	-6.479	-43.05	0.0156	0.0153277			stream	Main Tanllwyth stream channel above borehole T5 upstream of footbridge	0	7.71	-6.479	-43.05
72020	TAN	Tanllwyth Bridge	2007.08.14 10:00	2007.08.14 10:00	2007	8	14	10:00	2007.08.14	2007.61758	2007.61758	0.11083108	-0.9553384	6.93	-6.624	-43.751	0.0282	0.02770777			stream	Main Tanllwyth stream channel above borehole T5 upstream of footbridge	0	6.93	-6.624	-43.751
72029	TAN	Tanllwyth Bridge	2007.08.21 12:05	2007.08.21 12:05	2007	8	21	12:05	2007.08.21	2007.636996	2007.636996	0.08096172	-1.0917203	6.71	-6.553	-42.704	0.0206	0.02024043			stream	Main Tanllwyth stream channel above borehole T5 upstream of footbridge	0	6.71	-6.553	-42.704
72040	TAN	Tanllwyth Bridge	2007.08.28 10:52	2007.08.28 10:52	2007	8	28	10:52	2007.08.28	2007.656035	2007.656035	0.0526644	-1.2784829	7.42	-6.328	-40.798	0.0134	0.0131661			stream	Main Tanllwyth stream channel above borehole T5 upstream of footbridge	0	7.42	-6.328	-40.798
72049	TAN	Tanllwyth Bridge	2007.09.04 09:45	2007.09.04 09:45	2007	9	4	09:45	2007.09.04	2007.675086	2007.675086	0.05777364	-1.2382703	7.85	-6.361	-39.821	0.0147	0.01444341			stream	Main Tanllwyth stream channel above borehole T5 upstream of footbridge	0	7.85	-6.361	-39.821
72060	TAN	Tanllwyth Bridge	2007.09.11 15:54	2007.09.11 15:54	2007	9	11	15:54	2007.09.11	2007.694966	2007.694966	0.05109236	-1.291644	7.54	-6.153	-39.336	0.013	0.01277309			stream	Main Tanllwyth stream channel above borehole T5 upstream of footbridge	0	7.54	-6.153	-39.336
72069	TAN	Tanllwyth Bridge	2007.09.18 10:54	2007.09.18 10:54	2007	9	18	10:54	2007.09.18	2007.713573	2007.713573	0.0526644	-1.2784829	8.11	-6.061	-38.464	0.0134	0.0131661			stream	Main Tanllwyth stream channel above borehole T5 upstream of footbridge	0	8.11	-6.061	-38.464
72080	TAN	Tanllwyth Bridge	2007.09.25 12:50	2007.09.25 12:50	2007	9	25	12:50	2007.09.25	2007.732972	2007.732972	1.48285692	0.17109925	6.68	-5.27	-32.287	0.3773	0.37071423			stream	Main Tanllwyth stream channel above borehole T5 upstream of footbridge	0	6.68	-5.27	-32.287
72089	TAN	Tanllwyth Bridge	2007.10.02 09:57	2007.10.02 09:57	2007	10	2	09:57	2007.10.02	2007.751821	2007.751821	0.0786036	-1.1045576	7.34	-5.881	-36.124	0.02	0.0196509			stream	Main Tanllwyth stream channel above borehole T5 upstream of footbridge	0	7.34	-5.881	-36.124
72100	TAN	Tanllwyth Bridge	2007.10.09 09:38	2007.10.09 09:38	2007	10	9	09:38	2007.10.09	2007.770963	2007.770963	0.3140214	-0.5030408	7.49	-5.301	-31.806	0.0799	0.07850535			stream	Main Tanllwyth stream channel above borehole T5 upstream of footbridge	0	7.49	-5.301	-31.806
72109	TAN	Tanllwyth Bridge	2007.10.16 09:49	2007.10.16 09:49	2007	10	16	09:49	2007.10.16	2007.790162	2007.790162	0.20004616	-0.6988698	7.66	-5.529	-32.923	0.0509	0.05001154			stream	Main Tanllwyth stream channel above borehole T5 upstream of footbridge	0	7.66	-5.529	-32.923
72120	TAN	Tanllwyth Bridge	2007.10.23 09:44	2007.10.23 09:44	2007	10	23	09:44	2007.10.23	2007.80933	2007.80933	0.0829268	-1.0813051	7.75	-5.815	-35.746	0.0211	0.0207317			stream	Main Tanllwyth stream channel above borehole T5 upstream of footbridge	0	7.75	-5.815	-35.746
72129	TAN	Tanllwyth Bridge	2007.10.30 11:10	2007.10.30 11:10	2007	10	30	11:10	2007.10.30	2007.828672	2007.828672	0.23188064	-0.6347355	7.09	-5.427	-32.7	0.059	0.05797016			stream	Main Tanllwyth stream channel above borehole T5 upstream of footbridge	0	7.09	-5.427	-32.7
72140	TAN	Tanllwyth Bridge	2007.11.06 14:30	2007.11.06 14:30	2007	11	6	14:30	2007.11.06	2007.848231	2007.848231	0.08096172	-1.0917203	7.4	-5.634	-34.223	0.0206	0.02024043			stream	Main Tanllwyth stream channel above borehole T5 upstream of footbridge	0	7.4	-5.634	-34.223
72149	TAN	Tanllwyth Bridge	2007.11.13 11:02	2007.11.13 11:02	2007	11	13	11:02	2007.11.13	2007.867013	2007.867013	0.15445608	-0.811195	8.66	-5.337	-31.512	0.0393	0.03861402			stream	Main Tanllwyth stream channel above borehole T5 upstream of footbridge	0	8.66	-5.337	-31.512
72160	TAN	Tanllwyth Bridge	2007.11.20 10:50	2007.11.20 10:50	2007	11	20	10:50	2007.11.20	2007.886168	2007.886168	0.18629052	-0.7298092	8.8	-5.473	-32.388	0.0474	0.04657263			stream	Main Tanllwyth stream channel above borehole T5 upstream of footbridge	0	8.8	-5.473	-32.388
72169	TAN	Tanllwyth Bridge	2007.11.27 11:00	2007.11.27 11:00	2007	11	27	11:00	2007.11.27	2007.905365	2007.905365	0.1917928	-0.7171677	8.92	-5.543	-33.025	0.0488	0.0479482			stream	Main Tanllwyth stream channel above borehole T5 upstream of footbridge	0	8.92	-5.543	-33.025
72180	TAN	Tanllwyth Bridge	2007.12.04 13:24	2007.12.04 13:24	2007	12	4	13:24	2007.12.04	2007.924817	2007.924817	0.502277	-0.2990567	9.36	-5.796	-32.759	0.1278	0.12556925			stream	Main Tanllwyth stream channel above borehole T5 upstream of footbridge	0	9.36	-5.796	-32.759
72189	TAN	Tanllwyth Bridge	2007.12.11 11:20	2007.12.11 11:20	2007	12	11	11:20	2007.12.11	2007.94376	2007.94376	0.26882432	-0.5705314	8.78	-5.57	-33.299	0.0684	0.06720608			stream	Main Tanllwyth stream channel above borehole T5 upstream of footbridge	0	8.78	-5.57	-33.299
72200	TAN	Tanllwyth Bridge	2007.12.18 11:30	2007.12.18 11:30	2007	12	18	11:30	2007.12.18	2007.962957	2007.962957	0.07074324	-1.1503151	8.38	-5.705	-34.146	0.018	0.01768581			stream	Main Tanllwyth stream channel above borehole T5 upstream of footbridge	0	8.38	-5.705	-34.146
72209	TAN	Tanllwyth Bridge	2008.01.02 12:33	2008.01.02 12:33	2008	1	2	12:33	2008.01.02	2008.004161	2008.004161	0.12497972	-0.9031605	8.48	-5.716	-34.186	0.0318	0.03124493			stream	Main Tanllwyth stream channel above borehole T5 upstream of footbridge	0	8.48	-5.716	-34.186
72218	TAN	Tanllwyth Bridge	2008.01.08 11:05	2008.01.08 11:05	2008	1	8	11:05	2008.01.08	2008.020387	2008.020387	0.7117556	-0.1476691	17.8	-5.932	-33.003	0.1811	0.1779389			stream	Main Tanllwyth stream channel above borehole T5 upstream of footbridge	0	17.8	-5.932	-33.003
72229	TAN	Tanllwyth Bridge	2008.01.15 15:12	2008.01.15 15:12	2008	1	15	15:12	2008.01.15	2008.039982	2008.039982	1.18494928	0.07369976		-6.589	-39.888	0.3015	0.29623732			stream	Main Tanllwyth stream channel above borehole T5 upstream of footbridge	0		-6.589	-39.888
72238	TAN	Tanllwyth Bridge	2008.01.22 10:40	2008.01.22 10:40	2008	1	22	10:40	2008.01.22	2008.058591	2008.058591	0.54236484	-0.2657085	7.11	-4.91	-29.635	0.138	0.13559121			stream	Main Tanllwyth stream channel above borehole T5 upstream of footbridge	0	7.11	-4.91	-29.635
72249	TAN	Tanllwyth Bridge	2008.01.29 13:19	2008.01.29 13:19	2008	1	29	13:19	2008.01.29	2008.078019	2008.078019	0.10414976	-0.9823417	9.67	-5.251	-31.39	0.0265	0.02603744			stream	Main Tanllwyth stream channel above borehole T5 upstream of footbridge	0	9.67	-5.251	-31.39
72258	TAN	Tanllwyth Bridge	2008.02.05 10:59	2008.02.05 10:59	2008	2	5	10:59	2008.02.05	2008.096879	2008.096879	0.39341104	-0.4051535	9.76	-5.231	-29.967	0.1001	0.09835276			stream	Main Tanllwyth stream channel above borehole T5 upstream of footbridge	0	9.76	-5.231	-29.967
72269	TAN	Tanllwyth Bridge	2008.02.12 13:10	2008.02.12 13:10	2008	2	12	13:10	2008.02.12	2008.116253	2008.116253	0.07663852	-1.1155529	8.57	-5.527	-32.108	0.0195	0.01915963			stream	Main Tanllwyth stream channel above borehole T5 upstream of footbridge	0	8.57	-5.527	-32.108
72278	TAN	Tanllwyth Bridge	2008.02.19 10:26	2008.02.19 10:26	2008	2	19	10:26	2008.02.19	2008.135068	2008.135068	0.0526644	-1.2784829	8.98	-5.574	-32.987	0.0134	0.0131661			stream	Main Tanllwyth stream channel above borehole T5 upstream of footbridge	0	8.98	-5.574	-32.987
72289	TAN	Tanllwyth Bridge	2008.02.26 13:15	2008.02.26 13:15	2008	2	26	13:15	2008.02.26	2008.154514	2008.154514	0.53018128	-0.2755756	10.5	-5.146	-29.49	0.1349	0.13254532			stream	Main Tanllwyth stream channel above borehole T5 upstream of footbridge	0	10.5	-5.146	-29.49
72298	TAN	Tanllwyth Bridge	2008.03.04 11:31	2008.03.04 11:31	2008	3	4	11:31	2008.03.04	2008.173442	2008.173442	0.19729504	-0.7048838	9.15	-5.375	-30.976	0.0502	0.04932376			stream	Main Tanllwyth stream channel above borehole T5 upstream of footbridge	0	9.15	-5.375	-30.976
72309	TAN	Tanllwyth Bridge	2008.03.11 14:03	2008.03.11 14:03	2008	3	11	14:03	2008.03.11	2008.192856	2008.192856	0.75655964	-0.1211568	9.66	-5.7	-32.786	0.1925	0.18913991			stream	Main Tanllwyth stream channel above borehole T5 upstream of footbridge	0	9.66	-5.7	-32.786
72318	TAN	Tanllwyth Bridge	2008.03.18 11:25	2008.03.18 11:25	2008	3	18	11:25	2008.03.18	2008.211682	2008.211682	0.18078828	-0.7428297	10.4	-5.496	-31.959	0.046	0.04519707			stream	Main Tanllwyth stream channel above borehole T5 upstream of footbridge	0	10.4	-5.496	-31.959
72329	TAN	Tanllwyth Bridge	2008.03.25 14:10	2008.03.25 14:10	2008	3	25	14:10	2008.03.25	2008.231121	2008.231121	0.16467456	-0.7833735	10.4	-5.537	-32.045	0.0419	0.04116864			stream	Main Tanllwyth stream channel above borehole T5 upstream of footbridge	0	10.4	-5.537	-32.045
72338	TAN	Tanllwyth Bridge	2008.04.01 10:14	2008.04.01 10:14	2008	4	1	10:14	2008.04.01	2008.249799	2008.249799	0.38633668	-0.4130341	10.1	-5.517	-32.753	0.0983	0.09658417			stream	Main Tanllwyth stream channel above borehole T5 upstream of footbridge	0	10.1	-5.517	-32.753
72349	TAN	Tanllwyth Bridge	2008.04.08 12:40	2008.04.08 12:40	2008	4	8	12:40	2008.04.08	2008.269202	2008.269202	0.09550336	-1.0199813	9.63	-5.488	-32.72	0.0243	0.02387584			stream	Main Tanllwyth stream channel above borehole T5 upstream of footbridge	0	9.63	-5.488	-32.72
72358	TAN	Tanllwyth Bridge	2008.04.15 10:10	2008.04.15 10:10	2008	4	15	10:10	2008.04.15	2008.288043	2008.288043	0.16467456	-0.7833735	9.85	-5.778	-34.114	0.0419	0.04116864			stream	Main Tanllwyth stream channel above borehole T5 upstream of footbridge	0	9.85	-5.778	-34.114
72369	TAN	Tanllwyth Bridge	2008.04.22 10:14	2008.04.22 10:14	2008	4	22	10:14	2008.04.22	2008.307176	2008.307176	0.0829268	-1.0813051	9.86	-5.71	-33.909	0.0211	0.0207317			stream	Main Tanllwyth stream channel above borehole T5 upstream of footbridge	0	9.86	-5.71	-33.909
72378	TAN	Tanllwyth Bridge	2008.04.29 09:30	2008.04.29 09:30	2008	4	29	09:30	2008.04.29	2008.326218	2008.326218	0.24720832	-0.6069369	9.48	-5.826	-34.034	0.0629	0.06180208			stream	Main Tanllwyth stream channel above borehole T5 upstream of footbridge	0	9.48	-5.826	-34.034
72389	TAN	Tanllwyth Bridge	2008.05.06 15:00	2008.05.06 15:00	2008	5	6	15:00	2008.05.06	2008.34597	2008.34597	0.086857	-1.0611952	9.31	-5.755	-33.983	0.0221	0.02171425			stream	Main Tanllwyth stream channel above borehole T5 upstream of footbridge	0	9.31	-5.755	-33.983
72398	TAN	Tanllwyth Bridge	2008.05.13 10:23	2008.05.13 10:23	2008	5	13	10:23	2008.05.13	2008.36457	2008.36457	0.05973872	-1.2237441	8.78	-5.612	-33.502	0.0152	0.01493468			stream	Main Tanllwyth stream channel above borehole T5 upstream of footbridge	0	8.78	-5.612	-33.502
72409	TAN	Tanllwyth Bridge	2008.05.20 12:25	2008.05.20 12:25	2008	5	20	12:25	2008.05.20	2008.383927	2008.383927	0.04519708	-1.3448896	9.3	-5.648	-33.621	0.0115	0.01129927			stream	Main Tanllwyth stream channel above borehole T5 upstream of footbridge	0	9.3	-5.648	-33.621
72418	TAN	Tanllwyth Bridge	2008.05.27 12:48	2008.05.27 12:48	2008	5	27	12:48	2008.05.27	2008.403097	2008.403097	0.04519708	-1.3448896	8.45	-6.096	-35.073	0.0115	0.01129927			stream	Main Tanllwyth stream channel above borehole T5 upstream of footbridge	0	8.45	-6.096	-35.073
72429	TAN	Tanllwyth Bridge	2008.06.03 12:45	2008.06.03 12:45	2008	6	3	12:45	2008.06.03	2008.422217	2008.422217	0.04519708	-1.3448896	9.12	-5.97	-34.685	0.0115	0.01129927			stream	Main Tanllwyth stream channel above borehole T5 upstream of footbridge	0	9.12	-5.97	-34.685
72438	TAN	Tanllwyth Bridge	2008.06.10 09:55	2008.06.10 09:55	2008	6	10	09:55	2008.06.10	2008.44102	2008.44102	0.0393018	-1.4055876	9.03	-5.709	-33.995	0.01	0.00982545			stream	Main Tanllwyth stream channel above borehole T5 upstream of footbridge	0	9.03	-5.709	-33.995
72449	TAN	Tanllwyth Bridge	2008.06.17 12:44	2008.06.17 12:44	2008	6	17	12:44	2008.06.17	2008.460466	2008.460466	0.03537164	-1.4513448	8.73	-5.919	-34.291	0.009	0.00884291			stream	Main Tanllwyth stream channel above borehole T5 upstream of footbridge	0	8.73	-5.919	-34.291
72458	TAN	Tanllwyth Bridge	2008.06.24 09:45	2008.06.24 09:45	2008	6	24	09:45	2008.06.24	2008.479252	2008.479252	0.0526644	-1.2784829	8.49	-5.674	-33.728	0.0134	0.0131661			stream	Main Tanllwyth stream channel above borehole T5 upstream of footbridge	0	8.49	-5.674	-33.728
72469	TAN	Tanllwyth Bridge	2008.07.01 13:00	2008.07.01 13:00	2008	7	1	13:00	2008.07.01	2008.498748	2008.498748	0.12026352	-0.9198661	9.02	-5.649	-33.399	0.0306	0.03006588			stream	Main Tanllwyth stream channel above borehole T5 upstream of footbridge	0	9.02	-5.649	-33.399
72478	TAN	Tanllwyth Bridge	2008.07.08 09:40	2008.07.08 09:40	2008	7	8	09:40	2008.07.08	2008.517494	2008.517494	0.22009008	-0.6573995	7.92	-5.916	-34.226	0.056	0.05502252			stream	Main Tanllwyth stream channel above borehole T5 upstream of footbridge	0	7.92	-5.916	-34.226
72489	TAN	Tanllwyth Bridge	2008.07.15 12:40	2008.07.15 12:40	2008	7	15	12:40	2008.07.15	2008.536961	2008.536961	0.10650788	-0.9726183	7.84	-5.731	-34.647	0.0271	0.02662697			stream	Main Tanllwyth stream channel above borehole T5 upstream of footbridge	0	7.84	-5.731	-34.647
72498	TAN	Tanllwyth Bridge	2008.07.22 15:30	2008.07.22 15:30	2008	7	22	15:30	2008.07.22	2008.556409	2008.556409	0.09982656	-1.0007539	7.9	-5.743	-34.158	0.0254	0.02495664			stream	Main Tanllwyth stream channel above borehole T5 upstream of footbridge	0	7.9	-5.743	-34.158
72509	TAN	Tanllwyth Bridge	2008.07.29 12:30	2008.07.29 12:30	2008	7	29	12:30	2008.07.29	2008.575194	2008.575194	0.05620156	-1.2502516	9.09	-5.685	-34.319	0.0143	0.01405039			stream	Main Tanllwyth stream channel above borehole T5 upstream of footbridge	0	9.09	-5.685	-34.319
72518	TAN	Tanllwyth Bridge	2008.08.05 10:16	2008.08.05 10:16	2008	8	5	10:16	2008.08.05	2008.594065	2008.594065	0.58284568	-0.2344464	6.23	-5.57	-33.251	0.1483	0.14571142			stream	Main Tanllwyth stream channel above borehole T5 upstream of footbridge	0	6.23	-5.57	-33.251
72529	TAN	Tanllwyth Bridge	2008.08.12 11:10	2008.08.12 11:10	2008	8	12	11:10	2008.08.12	2008.613293	2008.613293	0.8210146	-0.0856491	6.15	-5.455	-32.276	0.2089	0.20525365			stream	Main Tanllwyth stream channel above borehole T5 upstream of footbridge	0	6.15	-5.455	-32.276
72538	TAN	Tanllwyth Bridge	2008.08.19 10:20	2008.08.19 10:20	2008	8	19	10:20	2008.08.19	2008.632324	2008.632324	1.09101796	0.0378319	5.67	-5.72	-35.355	0.2776	0.27275449			stream	Main Tanllwyth stream channel above borehole T5 upstream of footbridge	0	5.67	-5.72	-35.355
72549	TAN	Tanllwyth Bridge	2008.08.26 13:16	2008.08.26 13:16	2008	8	26	13:16	2008.08.26	2008.651784	2008.651784	0.16467456	-0.7833735	7.43	-5.635	-33.737	0.0419	0.04116864			stream	Main Tanllwyth stream channel above borehole T5 upstream of footbridge	0	7.43	-5.635	-33.737
72558	TAN	Tanllwyth Bridge	2008.09.02 10:05	2008.09.02 10:05	2008	9	2	10:05	2008.09.02	2008.670547	2008.670547	0.08921508	-1.0495617	7.35	-5.575	-33.431	0.0227	0.02230377			stream	Main Tanllwyth stream channel above borehole T5 upstream of footbridge	0	7.35	-5.575	-33.431
72569	TAN	Tanllwyth Bridge	2008.09.09 13:25	2008.09.09 13:25	2008	9	9	13:25	2008.09.09	2008.690052	2008.690052	0.23188064	-0.6347355	6.75	-5.853	-35.848	0.059	0.05797016			stream	Main Tanllwyth stream channel above borehole T5 upstream of footbridge	0	6.75	-5.853	-35.848
72578	TAN	Tanllwyth Bridge	2008.09.16 10:01	2008.09.16 10:01	2008	9	16	10:01	2008.09.16	2008.708791	2008.708791	0.10650788	-0.9726183	6.75	-5.999	-36.747	0.0271	0.02662697			stream	Main Tanllwyth stream channel above borehole T5 upstream of footbridge	0	6.75	-5.999	-36.747
72589	TAN	Tanllwyth Bridge	2008.09.23 13:37	2008.09.23 13:37	2008	9	23	13:37	2008.09.23	2008.728326	2008.728326	0.0613108	-1.212463	7.42	-6.268	-39.052	0.0156	0.0153277			stream	Main Tanllwyth stream channel above borehole T5 upstream of footbridge	0	7.42	-6.268	-39.052
72598	TAN	Tanllwyth Bridge	2008.09.30 09:04	2008.09.30 09:04	2008	9	30	09:04	2008.09.30	2008.746934	2008.746934	1.87901908	0.27393119	5.69	-6.532	-41.434	0.4781	0.46975477			stream	Main Tanllwyth stream channel above borehole T5 upstream of footbridge	0	5.69	-6.532	-41.434
72609	TAN	Tanllwyth Bridge	2008.10.07 11:02	2008.10.07 11:02	2008	10	7	11:02	2008.10.07	2008.766283	2008.766283	0.52625112	-0.278807	5.62	-6.603	-41.26	0.1339	0.13156278			stream	Main Tanllwyth stream channel above borehole T5 upstream of footbridge	0	5.62	-6.603	-41.26
72618	TAN	Tanllwyth Bridge	2008.10.14 09:53	2008.10.14 09:53	2008	10	14	09:53	2008.10.14	2008.785278	2008.785278	0.26253604	-0.5808111	5.96	-6.094	-37.804	0.0668	0.06563401			stream	Main Tanllwyth stream channel above borehole T5 upstream of footbridge	0	5.96	-6.094	-37.804
72629	TAN	Tanllwyth Bridge	2008.10.21 10:00	2008.10.21 10:00	2008	10	21	10:00	2008.10.21	2008.804417	2008.804417	0.5502252	-0.2594595	5.54	-5.629	-33.666	0.14	0.1375563			stream	Main Tanllwyth stream channel above borehole T5 upstream of footbridge	0	5.54	-5.629	-33.666
72638	TAN	Tanllwyth Bridge	2008.10.28 11:45	2008.10.28 11:45	2008	10	28	11:45	2008.10.28	2008.823742	2008.823742	0.33406532	-0.4761686	5.43	-5.646	-33.248	0.085	0.08351633			stream	Main Tanllwyth stream channel above borehole T5 upstream of footbridge	0	5.43	-5.646	-33.248
72649	TAN	Tanllwyth Bridge	2008.11.04 11:43	2008.11.04 11:43	2008	11	4	11:43	2008.11.04	2008.842864	2008.842864	0.10179168	-0.9922877	6.23	-5.71	-34.263	0.0259	0.02544792			stream	Main Tanllwyth stream channel above borehole T5 upstream of footbridge	0	6.23	-5.71	-34.263
72658	TAN	Tanllwyth Bridge	2008.11.11 11:04	2008.11.11 11:04	2008	11	11	11:04	2008.11.11	2008.861916	2008.861916	0.84420268	-0.0735533	6.97	-6.278	-36.978	0.2148	0.21105067			stream	Main Tanllwyth stream channel above borehole T5 upstream of footbridge	0	6.97	-6.278	-36.978
72669	TAN	Tanllwyth Bridge	2008.11.18 13:40	2008.11.18 13:40	2008	11	18	13:40	2008.11.18	2008.881337	2008.881337	0.59542228	-0.2251749	5.75	-5.572	-32.312	0.1515	0.14885557			stream	Main Tanllwyth stream channel above borehole T5 upstream of footbridge	0	5.75	-5.572	-32.312
72678	TAN	Tanllwyth Bridge	2008.11.25 10:28	2008.11.25 10:28	2008	11	25	10:28	2008.11.25	2008.900099	2008.900099	0.30734008	-0.5123808		-5.579	-32.35	0.0782	0.07683502			stream	Main Tanllwyth stream channel above borehole T5 upstream of footbridge	0	23.2	-5.579	-32.35
72689	TAN	Tanllwyth Bridge	2008.12.09 11:47	2008.12.09 11:47	2008	12	9	11:47	2008.12.09	2008.9385	2008.9385	0.23188064	-0.6347355	6.69	-6.157	-35.964	0.059	0.05797016			stream	Main Tanllwyth stream channel above borehole T5 upstream of footbridge	0	6.69	-6.157	-35.964
72700	TAN	Tanllwyth Bridge	2008.12.16 11:20	2008.12.16 11:20	2008	12	16	11:20	2008.12.16	2008.957574	2008.957574	0.15445608	-0.811195	6.75	-6.311	-37.425	0.0393	0.03861402			stream	Main Tanllwyth stream channel above borehole T5 upstream of footbridge	0	6.75	-6.311	-37.425
72709	TAN	Tanllwyth Bridge	2008.12.23 10:35	2008.12.23 10:35	2008	12	23	10:35	2008.12.23	2008.976615	2008.976615	0.32384684	-0.4896603	7.47	-6.023	-35.612	0.0824	0.08096171			stream	Main Tanllwyth stream channel above borehole T5 upstream of footbridge	0	7.47	-6.023	-35.612
72720	TAN	Tanllwyth Bridge	2009.01.06 11:10	2009.01.06 11:10	2009	1	6	11:10	2009.01.06	2009.014973	2009.014973	0.0479482	-1.3192277	7.75	-6.007	-35.68	0.0122	0.01198705			stream	Main Tanllwyth stream channel above borehole T5 upstream of footbridge	0	7.75	-6.007	-35.68
72731	TAN	Tanllwyth Bridge	2009.01.13 11:30	2009.01.13 11:30	2009	1	13	11:30	2009.01.13	2009.03419	2009.03419	1.40896952	0.1489016	5.38	-5.863	-34.14	0.3585	0.35224238			stream	Main Tanllwyth stream channel above borehole T5 upstream of footbridge	0	5.38	-5.863	-34.14
72740	TAN	Tanllwyth Bridge	2009.01.20 11:00	2009.01.20 11:00	2009	1	20	11:00	2009.01.20	2009.053311	2009.053311	0.327384	-0.4849425	6.8	-5.868	-34.186	0.0833	0.081846			stream	Main Tanllwyth stream channel above borehole T5 upstream of footbridge	0	6.8	-5.868	-34.186
72751	TAN	Tanllwyth Bridge	2009.01.27 13:50	2009.01.27 13:50	2009	1	27	13:50	2009.01.27	2009.072812	2009.072812	0.16231644	-0.7896375	7.03	-6.287	-37.168	0.0413	0.04057911			stream	Main Tanllwyth stream channel above borehole T5 upstream of footbridge	0	7.03	-6.287	-37.168
72760	TAN	Tanllwyth Bridge	2009.02.03 11:37	2009.02.03 11:37	2009	2	3	11:37	2009.02.03	2009.091737	2009.091737	0.07663852	-1.1155529	7.16	-6.219	-37.156	0.0195	0.01915963			stream	Main Tanllwyth stream channel above borehole T5 upstream of footbridge	0	7.16	-6.219	-37.156
72771	TAN	Tanllwyth Bridge	2009.02.10 14:58	2009.02.10 14:58	2009	2	10	14:58	2009.02.10	2009.111298	2009.111298	0.0479482	-1.3192277	7.67	-6.306	-37.814	0.0122	0.01198705			stream	Main Tanllwyth stream channel above borehole T5 upstream of footbridge	0	7.67	-6.306	-37.814
72780	TAN	Tanllwyth Bridge	2009.02.17 11:30	2009.02.17 11:30	2009	2	17	11:30	2009.02.17	2009.13008	2009.13008	0.07663852	-1.1155529	6.98	-6.406	-38.466	0.0195	0.01915963			stream	Main Tanllwyth stream channel above borehole T5 upstream of footbridge	0	6.98	-6.406	-38.466
72791	TAN	Tanllwyth Bridge	2009.02.24 15:55	2009.02.24 15:55	2009	2	24	15:55	2009.02.24	2009.149762	2009.149762	0.04008784	-1.3969873	7.71	-6.292	-37.211	0.0102	0.01002196			stream	Main Tanllwyth stream channel above borehole T5 upstream of footbridge	0	7.71	-6.292	-37.211
72800	TAN	Tanllwyth Bridge	2009.03.03 10:37	2009.03.03 10:37	2009	3	3	10:37	2009.03.03	2009.168335	2009.168335	0.065241	-1.1854794	7.74	-6.313	-37.082	0.0166	0.01631025			stream	Main Tanllwyth stream channel above borehole T5 upstream of footbridge	0	7.74	-6.313	-37.082
72811	TAN	Tanllwyth Bridge	2009.03.10 10:50	2009.03.10 10:50	2009	3	10	10:50	2009.03.10	2009.187538	2009.187538	0.81158216	-0.0906675	7.92	-6.965	-43.478	0.2065	0.20289554			stream	Main Tanllwyth stream channel above borehole T5 upstream of footbridge	0	7.92	-6.965	-43.478
72820	TAN	Tanllwyth Bridge	2009.03.17 10:31	2009.03.17 10:31	2009	3	17	10:31	2009.03.17	2009.20668	2009.20668	0.11083108	-0.9553384	7.18	-6.451	-38.815	0.0282	0.02770777			stream	Main Tanllwyth stream channel above borehole T5 upstream of footbridge	0	7.18	-6.451	-38.815
